# Supplementary material for: Bacterial N4-methylcytosine as an epigenetic mark in eukaryotic DNA
Source: Research Square preprint supplement (doi:10.21203/rs.3.rs-360382/v1), 2021-08-16
Supplement: Supplementary file 1 [file 3c4ec03a58cd0ef8a2568ae4.xlsx]

## Sheet: Data_S1
Supplementary Data File 1. Amino acid sequences of bdelloid N4CMT and Type II subtype β bacterial methyltransferases, with accession numbers from Genbank or REBASE (.fasta format)
>A_vaga_ref_GSADVT00006927001
MKKSNKKIEVIDLTKDENDEEKCATNQQCNGPTCRYTCRIVIENAVSSATVQQPIRPPNVHRESSLSNSDSFQKKKLKSFTNKYVVLDSLEGLRSLPDNSVQCVVTSPPYNKLGLREGRPYLGQIIYDTYDDNMNEDDYQKWQLQILNEINRILKPGGSAFYNHKDRRFCKRDHPPEKFLSDSDLELYQTIIWDRGSTVNQNARYFRPYVEKIFWFTKSISGESTTPKFHRDRLPEYFKGVIWRIPPDKRNKHPAPFPAILAEICILTTTEEGDLVLDPFAGSGTTLVAAASLKRSYLGFDISSKYQKMFHQRLATSKSKVHLWEEMYTVENIVDHRVRNGRMEYLLKWKGYDAKQNTWEYEENLNCPNLLEEFKASLKKRTKQKRSSFKKKPVIFASS…
>A_vaga_L1_WJQV01000250.1
MRMIEFYEFLIFNSMYIEICIKYLSAIFATELPLTKPSTIATPVEKSICPSNRDDLNKKKHKLLKNEYVLIDCLEGLKRLPDNSINCVITSPPYNKLGLREGRSYTGQIIYDTYDDNMKEDEYKQWQIQILNEINRVLVPGGSAFYNHKNRRLNKRDYPPEEFILGSDLNLYQSLFWYQGSTVNQNPAFFRPDMERVFWFCKSISKVPCTPKYYRNRLPERFKGSLWKIKPDKRNKHPAPFPSLLAEICVLSTTDEGDLVLDPFAGSGSTLVAAANFKRSYLGFDISKTYKNMFRRRLTQSNSKIALWEETYTVERIVDCRIRNGSVEYLLKWKGYSEKQNTWEDEDNLNCPGLLEEFKASLRKRKKQQRMLLSKKSVTLTSSIPLCKRKRTIPSVNPI…
>A_ricciae_OEQJ01000005.1
MAVRQTASLDTTVTSERTSQLHALQPDEHRTKSSLDKKEIIKRKSKSLRNKYVVVDSLEGLKKLPNNSVQCIVTSPPYNKLGLREGRPYLGQIIYDTYDDNMKEEEYQQWQLKILNEINRVLKPNGSAFYNHKDRRYCRQDYRPEDFVSKSDLKMYQTLIWDRGSTVNQNTAYFRPNVEKIFWLTKASSGTPKFYRDRLPECFKGSVWRIPPEKKNKHPAPFPLILSEICILATTDEGDLVLDPFAGSGTTLLAAANLKRSYLGFDLSHNYKMMFRQRIAASKKIHLWEQMYIVEKIVDHRIRNGCMEYLLKWKGYSEKENTWELEENLHCPGLLQQFKASLSNQKKAKSKSSNKRPVKLIHSNSSCDRKRSISSISSSSSDQSDESEMKRRCRGKASA…
>A_ricciae_OEQJ01000002.1
MAVRQTASLDTTITSERTSQLPASQPDEHRTKPSLDKQRIIKKKSKSWRNRYIVVDSLEGLKKLPNNSVQCIVTSPPYNKLGLREGRPYLGQIIYDTYDDNMNEEEYQQWQLKILNEINRVLKPNGSAFYNHKDRRYCGQDYRPEDFVSKSDLKMYQTIIWDRGSTVNQNTAYFRPNVEKIFWLTKASSGTPKFYRNRLPECFKSSVWRIPPEKKNKHPAPFPLILSEICILATTDEGDLVLDPFAGSGTTLLAAANLKRSYLGFDLSHNYKKMFRQRIAASKKIHLWEQMYTVEKIVDHRIRNGRVEYLLKWKGYSEKENTWELEENLHCPGLLQQFKASLSNRKKAKIKSSNKKPVKLIHSNSSCDRKRSISSISSSSSDQSDESETKRQCRGKASA…
>A_steineri_CAF3973545.1
MDKAAQFNENIEIIDLTNDYDFKEEPAINDYHEFSTCRFNCKVVIENKISLSRIPRPPTVHTSITHQKSSLSNNNGIKRKNIKSLMNKYIIVDCLEGLKMLPSNSIQCIVTSPPYNKLGLRNGRSYALQIVYDTYDDNMNENEYQKWQCDLLNEINRVLTPNGSLFYNHKDRRFCKRDYPPEQFILKSKLKLYQTIIWDRGSTPNQNNNYFRPNVEKIFWLTKSSADPSYTPKFYRNRLPECFKNSIWRIPPERRNKHPAPFPQLLAEICILATTDEGDAVLDIFAGSGTTLVAAANLHRQFIGFDISKKYQKMFHDRLAGADSINLWEEMYTVEEILDRRTKNGHTEYLLKWKGYDKSQSTWEQKNNLNCPDLLERFETSFKQKKRKKSIELNDNDST…
>R_magnacalcarata_OENM01001930.1
MHSPQKSSEKAELINPSMSANNQERSTTNNQCHSSAYQYSFRIVIKNEVICLFIFQSIVNKYMIVDCLKGLKILPSDSIQCIVTSPPYNKLGLREGRSYRGQIVYDTYDDDMDEHEYKRWQIDLLNEINRVLKPNGSLFYNHKDRRYRHRDYPPEEFIIRSDLNLYQTIIWDRSCTANQNAAYFRPNSEKIFWLTKASGSTVTAPKFYRDRLPECFKSSIWRIPPDRKNKHPAPFPALLAEICILATTDKGDLVLDPFAGSGTTLVAAANLKRSFLGFDISKKYQAMFEHRLATSNSDINMQKEFYVVENIIDKRFRNGSSEYLLKWKGFDHNHNTWENEKNLHCPDLLKQFETSLKNNNRKKYTPSNEKSSTMLHLNKVSNSFIII
>R_socialis_CAF3475215.1
MHSVTKSNEKAESINSTMPANNKERSMMSNQCHSSTYQYSFRIVIKNEISSSTTTASKPDGIEKKKLKSIVNKYLIVDCLKGLKVLPSNSIQCIVTSPPYNKLGLREGSSYSGQIVYDTYDDDMDEHEYKRWQIDLLNEINRILKPNGSLFYNHKDRRYRHRDYPPEEFIIRSDLNLYQTIIWDRSCTANQNAAYFRPNSEKIFWLTKSSRSTVTAPTFYRDRLPECFKSSIWRIPPDRKNKHPAPFPALLAEICILATTDKGDLVLDPFAGSGTTLIAAANLKRSFLGFDISKKYQAMFKHRLATSNSDINMWKEFYVVEKIIDKRLRNGHVEYLLKWKGFDHNQNTWENERNLDCSDLLKQFETSSKKNKRNTCTSSNERFSTRLHLNKSRVHKMKK…
>R_macrura_OENT01003821.1
MNNDSSSRMQSHVFLSKFQSMKNNYVIIDCLEGLKRLPNNSVQCVVTSPPYNKLGLRQGRSYLGQIIYDTYNDNMDEHEYKQWQCDLLNEINRVLTLDGSLFYNHKDRRYCNRDYPPEEFLLRSNLRLYQTIIWDRGSTVNQNPAYFRPNLEKIFWLTKSSSTTSPVPKFYRDRLPESFKSSIWRIPPEKHNKHPAPFPAIIAEICILATTDDGDIVLDPFAGSGTTLLAAANLKRFFIGFDISKNYQGMFKQRMINSNRQVQLWNEMFLVENILDRRIRNGCVEYLLKWKGFTDTENTWENENNLNCPDLLERFEMTLKKKKKNKQFVSLNQNYSATALENQVSQFYERILLDKTEKNGTGEFSFTL
>Rotaria_sp_Silwood2_c411
MRLALSSKINFPISIIERIFYSTIKSIFSLILYRVSKNFISTSRYLFFTSDSMINKYVIIDCLKGLKMLPSNSIHCIMTSPPYNKLGLQQGRPYRGQIIYDTYDDDMNEDEYKQWQCDLLNEINRVLTPDGSLFYNHKDRRYCKRDHPPEEFILRSNLNLYQTIVWDRGCTANQNSAYFRPNLEKIFWLTKSLSDTSIAPKFNRDRLPECFKSSIWRIPPDRRNNHPAPFPALLAEICILATTDEGDLVLDPFAGSGTTLLAAANLRRSFLGFDISKKYQAMFKHRLNTSNRHVHLWEEMFVVEKILDRRIRNGGVEYLLKWKGFDDDQNTWENEQNLDCPDLLEQFETSLKKHKTKKHTSSNKKSSTIMTSSKVSHYYHYNSLDKTCCEFFKISSVKF…
>Rotaria_sp_Silwood1
MHRMTTSKKNIELIDLTKDENIQEKSIMNNQCQYTFRILVKNEISSTTNVPKVTHTSINHQQSLKSNIHDDKTKKFKLFINKYMIIDCLKGLQMLPNNSVQCIVTSPPYNKLGLREGRQYKGQIIYDTYDDNMNEDEYQQWQCNLLNEINRVLTPNGSLFYNHKDRRYCKRDYPPENFILQSNLKLYQTIIWDRGYTANQNSGYFRPNLEKIFWLTKSSIDCLSLPKFYRNKLPECFKSSIWRIAPDRKNSHPAPFPQLLAEICILATTDQGDLVLDPFAGSGTTLVAAANLKRSFLGFDISKKYQRMFQKRLTNSNAQVNLWEQMFVVEKILDQRIRNGCVEYLLKWKGFDHDQNTWEDKNNLHCPDLLKQFESSLKKYKRKKYASSTKVSSHVHKRK…
>R_sordida_CAF1159781.1
MIRRNTKSNRTVEIIDLSKDNDDAKQEFFIHNHRQSSTFHYNYNIRIDIKIPSKTTRTTNINKELSLSNDHYINKKKLNLMINKYLIIDCIKGLKMLPNDSIQCIITSPPYNKLGLRQGRPYNGQIIYDTYDDNMNEIEYQKWQCKLLNEINRVLTPSGSLFYNHKDRRYSHCDYPPEQFILQSKLKLYQTIIWDRGSTPNQNNSYFRPNHEKIFWLTKSSSSLSSSPKYYRDRLPEYFKNSIWKIKPDRTNKHPAPFPSIIPEICILSTTDENDIVLDPFAGSGSTLIAANNLKRSFIGFDISKKYQNMFKQRLTNSNDKIHLWEEMFTVEKILDRRIKNGSIEYLLKWKGFNNDQNTWETENNLDCPDLLEQFKTSLKKYKKKKYSSSNKKSLVKMS…
>Habrotrochid_N4CMT_bioreactor
MNSYMLIDCLAGLKLLPDNSVQCVITSPPYNKRGLHNGLLFPGQIVYDEYDDNMNEDEYEKWQIEILIEINRILKPDGSLFYNHKDRRFRKKDYPPEVFLSKSPLTLYQTIIWDKGVTACQNPMFFRPTAEKIFWLIKSSPTNSRTIKFYRHRLPVSFQGCTWKISPEKNVKHPAPFPLILPELCILATTDENDLILDPFAGSGTTLIAAHNLKRNYLGFDLSRQYQKLFNQRLIQLNNNIQLWKQDFTVEKILNKRIRNGSIEYLLKWKGFDETENTWINEENLNCSDLIADYERQHRKRRKTISHEKNSLLKKKK
>Habrotrocha_rosa_PCR
NSPHRSPTILHNQSKKNENLKSLINSYVLIDCLHGLKLLPNDSVQCVVTSPPYNKRGLHEGRIFLGQIVYDTYDDNMEERQYQYWQCQILNEI
>AOV61092.1_DNA_methylase_Synechococcus_phage_SCAM22
MIINKDCIEGMKEMEDNSIDCIVTSPPYNKKGLLGKVKQGNQIWGKFQIDYNTYGDDMPEDQYQAWMIEFLNQCHRIIKPDGSIFFNHKPRRFKNRCYLPTDFIIHSDVQLYQLIIWDRRNSPNIRNDVLVPCTEHIYWFCKKKPKVFRDAVSPEYRGEVWVIPPDRQKQHPAPFPPQLVKNCIALSTEVGDTVLDPFMGSGTTAMVATECNRKWIGFDIDEKYVSITNERTNAGLTSLF
>AOO15326.1_DNA_modification_methylase_Cyanophage_SRIM12
MKEMEDNSINCIVTSPPYNKKGLLGKVKQGNQIWGKFQIDYNTYGDDMPEDQYQAWMVEFLNQCHRVIKPDGSIFFNHKPRRHKNRCYLPTDFISQSDAQLYQLIIWDRRNSPNIRNDVLVPCTEHIYWFCKKKPKVFRDAVDPAYRSEVWVINPERQKQHPAPFPPQLVKNCIQLTTEKGDVVLDPFMGSGTTALIATECNRNWIGFDIDEKYAILTKERTNQTNLNHILK
>BCSF01001084.1_Uncult_marine_virus
MIIEKDCIEGMKELEPNSVDCIITSPPYNKKGLLGNVKRGNQIWGKFNIDYSTYGDDMPEEEYQAWMVAFLNECHRVIKDDGSIFFNHKPRRHKNRCYLPTDFIAHSDAQLYQLIIWDRRNSPNIRNDVLVPCTEHIYWFCKKKPKVFRDAVDQQYRSEVWVISPDRQKQHPAPFPEQLVRNCIQLTTQAGDLVLDPFMGSGTTAMVAQSLQRKWMGYEIDKEYIKISTERLNSSVLSFT
>YP_009213669.1_DNA_methylase_Prochlorococcus_phage_PTIM68
MSMIDLRLGDCIQLSKELEDDSIDCTVTSPPYNKCGVGGGLFRKIEYAAFDDTLPEDEYQNQQIELLNILFDKTKQGGSLFYNHKVRYFKGDAISPWQWLTKTKWNIREEIVWNRGSGPEISGYRFIQIDERIYWLCKGEKHPRLPRRSANYGSVWKFGPEMSNPHPAPYPIKLPLRCIQGVMQEKGVVLDPYSGSGTTGLAAQLLGHDYIGFDLSDEYHDMARERLANPSKNDLKKFTEECGVEVKSDTDVFNLAGA
>M.TbaTF1ORF1101P_N4N6_TCGA_273_aa
MDEIIFNLKNKIICGDVLEVLREIPDDTFDLGITSPPYNKKEKYSGWLVDKVKYDGISDIKNEEDYQKWQIEVLNELYRVVKPGGSFFYNHKIRYENGKLIHPIEWISKTRWTLWQEIIWNRKIAGNIRGWRFWQIDERIYWLVKGKPDELKPEHAKLTSIWEIRPESGHKDHPAPFPIELPVRIIYSILEDRPGFIIDPFCGTGTTCVAAKLLEKDYLGIDISEKYVEYALKRLENAESERIRVIKEINQHFVGLTFQERKLLGLAKDRRKQ
>M.Tru12173ORF8030P_N4N6_TCGA_270_aa
MEGLEKFINQVICGDALEVLRKMPDESIDLGITSPPYNKKEKHGGWLVDKVRYKGYRDVMPEEEYQSWQVEVLNELYRVIKEGGSFFYNHKVRYEDGKMIHPLQWLLKTKWNIWQEIIWNRKIAGNIRGWRFWQVEERIYWLVKGKPKELKPKHAKLTSIWEIRPEQGHKEHPAVFPIELPTRIIASLLEEEDGIVIDPFCGTGTTLVAAKLLGKKYIGIDISEEYVEYAKRRLEKAEKEKARVLKELSLHSIELTFKERKERGFWNKRA
>M.Hwi430ORFCP_N4N6_TCGA_277_aa
MLVCGDALKELQKLQSNSVDIGVTSPPYNKQENKKGWLVKNVIYDATSDKLDEEYYQKSQIAVLDEVYRVTKEGGSFFYNHKIRWEKGRLIHPLEWIVKTQWNLRQEIIWDRGIAANIRGWRFWQVEERIYWLQKPKGKNLIGEELQSRHALLSSIWRIRPESNNAHPAPFPLALPLRCIFSILNEKSGVVLDPYCGSGTSGIAAKILNCEFIGIDNSQNYLEFAKHRIANYRDYIQEAQNELQLHKVRESFKEKKQKGKTKNRFLPTTSLFNTDIN
>M.HciORF741P_N4N6_TCGA_274_aa
MLICGDTLSELQKLENDSIDMGVTSPPYNKQENKRGWLVKNVLYDNTCDKLDEKAYQENQIAVLNELYRITKEGGSFFYNHKIRWEKGKLLHPLQWISQTKWNLRQEIIWDRGIAGNIRGWRFWQIEERIYWLIKPKGKNLIGEELQSRHALLSSIWRIRPESNNAHPAPFPLALPLRCIFSILNENGGVVIDPYCGSGTTGIAAKILNCDFIGIDNAKTYLTLAESRITNYQHFLKEAQLELNLHEVKETFSEKKAKGKSKDRFALRGQGVLL
>M.PmaEXORF210P_N4N6_TCGA_294_aa
MVSEFIDKVICGDTLETLKKIPDNSIDLGITSPPYNKREDKKGWLVDKITYKGATDNLPEEVYQETQIKVLNELYRIIKPGGSFFYNHKIRWEKGIMFHPMDWLRKTKWIIRQEIIWDRMIAANLRGWRFWQVEERIYWLYKPIGNNKIGKELKSRHALLTSIWRLLPENNNPHPAPFPIALPVRIIYSIFDEERGKLVIDPYCGSGTTLVAAKILGHHYLGIDISQEYTDYALKRLENYQFEIPKAQEEISKHVVKKTFKERKEKGEFVGKYRKKTQQKNPSLFDILEKVEDK
>M.NciI_4mC_CCSGG_513_aa
MKINKFNLEKILNKFICGDSLQKMKKLPSKSIDLIFTSPPYNLKNSTGNGMKDGRGGKWSNARLIEGYDNHDDCMPHDEYVKWQRKCLKEMLRLIKDDGAIFYNHKWRVQNGLLQDRADIVKGFPVRQIIIWKRKGGINFNPGYFLPTYEVIYLICKKPFKLAKGANSFGDIWEFTQDMNNEHPAPFPLELAKRVVQSTNAQIVLDPFMGSGTTAIAAALLDRKFIGIELSSEYVKISKKRYNNIFGNLFGVD
>M.Pag7805ORF570P_N4N6_CCSGG_249_aa
MNQNELLDKFICGDCISIMSRMPDNCLDLVVTSPPYNLKNSTGNGMKDGRGGKWKNAELVHGYSDYDDNMPHEKYVEWQRECLSQMMRLLKDDGAIFYNHKWRVQDGLLQDRQDIVSGFPVRQIIIWRRKGGINFNPGYFLPTYEVIYLITKPKFKLTPKANAHGDVWEFTQEMNNSHPAPFPIALARRCIESTNAEIILDPFMGSGTTAVAAKRLGRSFIGIDLSAEYCQKAEHRLRTDTPQLELSFS
>M.MspMx1ORF4475P_N4N6_CCSGG_301_aa
MKFFHQNIIHRRNISYKYIDLNHQNDMMPLDQELMLSKADYIDKIIHGDCLEIMKRMPDESVDIILTSPPYNLKNSTGNGMKDGRCGKWANAALQNGYESHSDDLPHEEYVAWQKDCLREMMRLIPDNGAIFYNHKWRVQGGLLQDRSDIVSQFPVRQIIIWKRSGGINFNSGYFLPTYEVIYLIAKKNFKLAPKANAYGDVWDIKQEFHNKHPAPFPLELAKRVISSTTAEIVLDPFMGSGTTALAAKTLDRHYVGIELSKEYCKMAEDRLTQSVDFYALSSHCGNENSGCEYNDTILKR
>M.Bgw2011ORF13P_N4N6_CCSGG_254_aa
MKKLKYPTDFLNKIICGDAVEVMKQIPDGSVDLIVTSPPYNLKNSTGNGMKDGRGGKWANAALQNGYTHHDDCMPHDEYVKWQRDCLAQMLRIIPEEGAIFYNHKWRVQDGLLQDRQDIVSGFPVRQIIIWKRKGGLNFNAGYFLPTYEVIYLIAKSKFKLADKANAQGDVWEFTQEMGNDHPAAFPVTLINRIISSTNAKMILDPFMGSGTTAISAINYNRNYIGIDLSPEYCKMAERRIELRKKQVKLLIEV
>M.VvuBAA87ORF24400P_N4N6_CCSGG_249_aa
MYSLDSIKNKILCGDVLEEMKKIPEQSVDLIVTSPPYNLKNSSGNGMKDGRGGKWANAQLINGYANHGDNMPHDEYVSWQRSCLTEMMRVLKDDGAIFYNHKWRVQKGLIQDRQDIVEGFPVRQIIIWQRKGGFNFNPGYFVPTYEVIYMIAKPGFKLAKGANGHGDVWQIGQAKGIDHPAPFPVELVERVISSTNAQVVLDPFMGSGTTAIAATNLKRDYIGIEIAEEYCKYAEQRILEETGQQQLAL
>M.XfaTORF1649P_N4N6_PB_CCSGG_273_aa
MPPEMALLELDFDEAVRRVIKAAKKLPKGDNSARNLRGTIHSGDCIKVMQTLPAESFRVIVTSPPYNLKNSTGNGMKDGRGGKVSNGALIEGFDNHEDVMPHDEYVRWQRDCLTEMMRLLRNDGAIFYNHKWRVQAGLLQDRTDIVTGFPVRQIIIWQRNGGINFNSGYFLPTYEVIYLIAKPDFKLKPKANAIGDVWTIPQESKNPHPAPFPVELAQRCIESVGAEPVLDPFMGSGTIAVAAEILGYDWVGIEKSPKYVEMSLDRLKSLKGK
>M.SphSyn19ORF154P_N4N6_GTAC_270_aa_Synechococcus_phage_Syn19
MAHQVFQRMIYLKDCLEGMKELEDGSIDAIITSPPYNLNIKYGRYSDNKPRQEYLSWLVDIFREAKRILADDGHLFVNMGYSNIDPWIGMEVGLALREDWILQNHINWVKSIHVNGKTSGHFKPINSKRFVCPTWEHLFHFTKDGNVEIDRLSVGVQYEYYEANIRGNNTAETKPNLRDKGNCWFVPYETINSKELRGKHPATFPVKLAEDCLKLTGKDTGIALDPFMGTGTTAVAAQILGWDCIGYDIDEDYIKFANNRLNQGLTSFLS
>M.AspSLV7II_4mC_GTAC_285aa
MKAAKGNGASRANTTHTKPPRARRYKIGQQEIVMGDCLRALKRVPAESVDVVVTSPPYNIGLSYRSYPDRREEEDYLDWMLEVAQQLQRILKDDGSFFLNISGSSAQPWLPFELAVRLRDLFVLQNHISWVKSISVGEDSFGHFKPMNSQRFLHRGHEHVFHFTLHGDVRLDRLRAGVPYKDKSNIARRGHRQDRRCRGDTWFIPYETVRGRAEKFDHPGTFPVALPEQCILLHGREGARVLDPFMGTGTTLLAAQRLGCYGLGMELDPEYVAIARARLKDDLAS
>M.KnaRZS01I_4mC_GTAC_296aa
MTGRPRAGQVSASTPRLPRTVRYTEGPHLLVRGDCLRALRRMEADSVDVVVTSPPYNIGLKYRTYRDRLEEDGYLDWMLEIAREVRRVMRPDGSFFLNVAGSSAQPWLPFELMVRLREVFVLQNHIAWVKSISVGTDTHGHFKPVNSHRYLNRNHEHLFHLTRGGDVGLNRLDIGVPYKDKSNIVRRGHRQDRRCRGDTWFVPYETVQGKAQKFHHPGTFPVLLPQMCIRLHGKNAPVVLDPFMGTGTTLVAAVREGGRGIGIDLDTIYVNVARQRVRQAMAAADAGADGVDDRNY
>M.MjaV_4mC_GTAC_PB_292_aa
MEINKIYCMDCLEGMKQLKDKTVDVVVTSPPYNIGIKYNKYSDNLSREDYLNWIEEVVKEIKRVLKDDGSFFINVGYTAKDPWIAFDVANVIRKHFKLQNTIHWVKSIAIQKEDVGNYPNIIGDIAVGHYKPINSDRFLSIMHEYIFHFTKNGNVKLDKLAIGVPYQDKSNIKRFNRKGDLRDRGNTWFIPYETIQSKEKERPHPATFPPKLPEMCIKLHGVKKTNLVLDPFMGIGSTAIACIRLGIDYIGFEIDEYYCRVAEERIKKELLKTDGKFDNVKNKNIITLDAFI
>M.MlaZII_4mC_GTAC_262_aa
MDCVEGMSTLTPGMVDVIVTSPPYNIGKAYTTYDDTIPRNTYLKWMRTVAEESYRVLSDHGSFYLNIGGSLKDPWIPIDVAQAFREQGFVLQNMIHWIKSIALPDEGVAAGHYKPINSKRYHNDCHEFIFHFTKNGTVQIDRLATGVPYQDKSNVNRWGGEKRDLRDRGNTWFIPYETIRESRPHPATFPIQLPVMCIKDHGLDKCRLVMDPFMGIGNTAIAAIRLGVPFIGFEIDEGYRKVANERVSAELRRESNNQEDCI
>M.SmaI_4mC_CCCGGG_292_aa_sp|P14230.1|MTSM_SERMA
MKKHSNNLDLFDQTEECLESNLRSCKIIVGDAREAVQGLDSEIFDCVVTSPPYWGLRDYGNGGQIGAEDNINDYIKDLVDLFRDVRRTLKDDGTLWLNIGDSYTSGGRTWRDKDDKNKGRAMSYRPPTPEGLKPKDLIGVPWRLAFALQNDGWYLRTDIIWNKPNCQPESVRDRPTRSHEYIFLLSKGKKYYYDWESIKEPASDPKMDKKNRRTVWNINTEPYPGSHFAVFPRAMARLCVLAGSRPGGKVLDPFFGSGTTGVVCQELDRECVGIELNEEYASLAKERILRRR
>M.Xca85III_4mC_CCCGGG_313_aa
MHGNLCTAVFRRTSMLLIVNENEPDTSTHTDEPIQEPARGRLVVGDARKVLAGMADKSFQCCITSPPYWGLRDYGVDGQIGAEPTLEAYIEDLVALFREVRRTLRDDGTLWLNIGDGFTSGGRTWRAPDKKNKGRAMEYRAPTPDGLKPKDLIGVPWRLAIALQADGWYLRADIIWQKPNCQPESVKDRPTRSHEYVFLLTKSERYYYNSDAVKELTADGKHTKNRRSVWAINTEPYGGNHFAVFPTELVRLCMEAGSKKEEVVLDPFFGSGTVGQVARDNGRKFVGIELSPDYAELARKRLASKSNSRKLQR
>M.Cfr9I_4mC_CCCGGG_300_aa_fragment_sp|P14243.2|MTC9_CITFR
MPSKKSSSPLSVEKLHRSEPLELNGATLFEGDALSVLRRLPSGSVRCIVTSPPYWGLRDYGIDEQIGLESSMTQFLNRLVTIFSEAKRVLTDDGTLWVNIGDGYTSGNRGYRAPDKKNPARAMAVRPDTPEGLKPKDLIGIPWRLAFALQEDGWYLRSDIVWNKPNAMPESVKDRPTRSHEFLFMLTKSEKYYYDWEAVREEKDSGGFRNRRTVWNVNTKPFAGAHFATFPTELIRPCILASTKPGDYVLDPFFGSGTVGVVCQQEDRQYVGIELNPEYVDIAVNRLQGEDTNVIRIAAA
>M.XmaI_4mC_CCCGGG_300_aa
MPKANTAPPSGVERILRPEPLILRGSTLFEGDALTVLRRLPSGSVRCVVTSPPYWGLRDYGIEEQIGLEVTMPQFLHRLVAIFAEVKRVLTDDGTLWLNIGDGYTSGNRGYRAPDKKNPARAMDVRPDTPVGLKPKDLMGIPWRLAFALQDDGWYLRSDIVWNKPNAMPESVKDRPARSHEFLFMFTKSEKYFYDWQAAREPADGGGLRNRRSVWNVNTKPFAGAHFATFPPELIRPCIHASTEPGDYVLDPFFGSGTVGLVCQDENRQYVGIELNPEYVTLAADRLQGQNSNVIRIAAA
>M.TmaI_4mC_CGCG_329_aa
MWVRVPPPAPFSIFLSPGDDIVKRRKSTRTSSFGVKGRESHDSSPFYSRAIYSNFSLPKPSEEDLIENPLPENLLDKVIEGDAREVLKKIPDCSIHLMVTSPPYNVGKEYDEDMTLDEYLEFIEEIMKEVYRVLVWGGRACFNVANLGRKPYIPLHAYLIHLFEKIGFLIRGEIIWDKGEAVSGSSTAWGSWMSPVNPVLRDQHEYIIVMSKGDLKRRKPSDREAKSTITREEFLEFTRSVWKFPPESAKRVGHPAPFPEELPYRCIQLYTFKGDVVLDPFAGVGTTCVAAVKTGRHFVGIEINPEYVKKAEERVKDILSKPTLFEDHC
>M.ThaI_4mC_CGCG_PB_309_aa
MKDSHKRNGTETSSFGSPSRANHDSSKFYNSRLYEAFPKAENNIDFTENKVPEIALDRIFCKSSEKMDEIPDNSIHLMVTSPPYNVGKLYDKDMSLAEYRDFLSSVWKEVYRVLVPGGRACINIANLGRKPYIPLHAFIIEDMIKLGFLMRGEVIWDKGATASSSVAWGTYLSAKNPVLRDSHEYILIFSKQTFTRGIKENMRSTMSKEEFIEYTKSVWSFGAESATRIGHPAPFPVELPKRCIKLYTFEEEVVLDPFIGSGTTAISALMLNRHFVGYDVDPEYVKLANKRINMILSKRKQQVLRESET
>M.Dac11109ORF2470P_4mC_CGCG_PB_298_aa
MKKGSRTSRFGTNVRINHDSSDYYGSRMYSELPPHNGEDSISDNDFPVPYENQIIAHSSENMVEIPDNSLHLMITSPPYNVTKEYDENLSLEEYLQLLRMVFSETYRVLVNGGRACVNIANLGRRPYLPLSDFISTMMIDIGFRMRGEIIWNKGAGAGVSMAWGSWQSASNPVLRDVHEYIMVFSKGAFMRQKPENRENTISREQFMEWTKSVWTMNPESAKKVEHPAPFPVELPYRLIQLYTFKGDVILDPFMGSGTTGIAALKADRKYIGYENNPKYVKLAEERIAPYKLQMKLGI
>M.FisAW1I_4mC_CGCG_304_aa
MASRKIGTVTSAFGAPSRINHDSSPFYSRNLYSNLPKEQNLSYVETPLPDEVINKIILKSSENMEELPDNSIHLMVTSPPYNVGKEYDEDLTLNEYRDFLKRVWREVYRVLVPGGRACINLANLGRKPYIPLHVYVIEDMLEVGFLMRGEVVWNKGATASSSTAWGSWMSASNPSLRDVHEYILIFSKGTFTRKNPKGRKSTISKEEFLEFTKSIWTFPAESAKKIGHPAPFPVELPYRCIQLYTFEGEVVLDPFMGSGQTAIAALMTGRNYVGYEINEEYLNLANRRIYDFLQKKNTKTLFDI
>M.Tph12270II_4mC_cGCg_306_aa
MATKTASFGSPKREGHDASHFYSRSLYKVDFASLHRFLIDTCTAQLAGRERSVPPRPLMDWGDRIYCHTSEDMHQIPDNSVALAFTSPPYNSGKEYDEDLDLQMYFGLIARVGAEVFRVLKPGGRYVINIANLGRKPYLPLHAYFYLVHIGLGFLPAGEVIWQKGRGASGSCAWGSWLSARSPRLRDIHEYLLVFVKEHFKRPEKGESDISKDEFMSSTLSIWEVPPESAKRVGHPAPFPVELASRVIRLYSYVDDVVLDPFCGSGSTCVAAKRLNRHWVGYDIVEEYCALAEERLTKEGLGKCRA
>M.HpyFV_4mC_CCGG_255_aa
MKPYFSLEKLDLYHGDVSVLETFEKGFYDLCVTSPPYNLSIEYQGSNDFRVYDDYLNWCKNWLKNCYFWGKEQARLCLNVPLDTNKHGKQSLGADIIAIAKECGWKYQNTIIWNESNISRRTAWGSWLQASAPYAIAPVELIVIFYKNEYKRQKQTSTISKEEFLLYTNGLWSFSGESKKRLKHPAPFPRELPRRCIKLFSFLEDTIFDPFSGSGTTILEANALGRFSVGLEIEKEYCELSKKRILESLSLVRAF
>M.HpyAORF263P_4mC_CCGG_252_aa
MKPYFSLEKLDLYHGDVSVLETFEKGFYDLCITSLPYNLSIEYQGSDDFRAYDDYLNWCKNWLKNCYFWGKEQARLCLNVPLDTNKHGKQSLGADIIAIAKECGWKYQNTIIWNESNISRRTAWGSWLQASAPYAIAPVELIVVFYKNEYKRQKQTSTISKEEFLLYTNGLWNFSGESKKRLKHPAPFPRELPRRCIQLFSFLEDTIFDPFSGSGTTILEANALGRFSVGLKIEKEYCELSKKRILESLSLV
>M.AspAR10ORF1329P_N4N6_CCGG_267_aa
MNKNYFSHDNIRIINDDAISTDAIENKSIDLIITSPPYNVDIKYNSHNDKISYSDYLDFSKKWLSRCFNWLKDDGRFCLNIPLDKNKDGQQSVGADLTNIAKSVGFKYHSTIIWNEGNISRRTAWGSWMSARAPYVIAPVELIVILYKNEWRKTTGSGISDIKKDEFMGWTNGVWTFSGESKKKIGHPTPFPLELPQRCIKLFSFVDDVVLDPFLGSGSTLIAAYLNKRKGIGIEIDKTYCELAKKRLKNEAIEQQKLVLENTKSAH
>M.TmeBII_4mC_CCGG_255aa
MRNWEAIQGIKLINEDFLKTRIPENSIDLIVTSPPYNVGIPYNSHNDKITYKDYLIWTEKWLTKAFQLSKPDGRMCLNIPLDKNKGGQQSVYADIVYLAKKIGWKYHSTIIWNEGNISRRTAWGSWLSASAPYVIAPVETIVILYKETWKKQKRGKSDILREEFIEWTNGLWTFSGESKKKIGHPAPFPFELPKRCIKLFSYVGDVILDPFLGSGTTAIAAFRLKRKVIGVEIDKKYFELAIKRISKQCFRLEGF
>M2.MboII_4mC_GAAgA_IIS_273_aa_ss
MNTIFFKDSRNMQEVPNNSVHLIITSPPYFNIKDYAKDGYQLNSHSNKHSQQIGDIDSYEYYLSEMLKVWQECERVLKPTGKLVINTPLMPMLKKEMNTHYTRHIFDLNSDIQQTILKNTKLFLMDTYLWNRTNSSKKLMFGSYPYPRNFYAQNTTEFITIYVKDGKPDKVSDEIKEKSKLSKQEWVEYTKQIWDIPIPSKNDLAFGVHSAIMPEEIPRRLIKLYSFYDDTVLDPFAGSGTTLKVAKELGRRYIGYELMEQYSEVICKKLESI
>M2.NcuI_4mC_GAAGA_IIS_278_aa
MNTVFFKDSRNMKEVPNNSVHPIITSPPYFNIKDYAKDGYQQNSHSNKHTSQIGDIDDYENYLIEMLQVWRECERVLTPNGKLVINTPLMPMLKKDMNTHYTRHIFDLNSDIQQTILKNTNLFLMDTYLWNRTNSSKKLMFGSYPYPRNFYAQNTTEFVTIYVKDGKPNKVSDEIKEKSKLTQQEWVEFTKQIWDIPIPNKNDLAFGVHSAIMPEEIPRRLIKLYSFYGDTVLDPFAGSGTTLKVAKELGRKYIGFELMEKYSEIIDLKLRDADLRLW
>M2.HpyAII_4mC_GAAGA_IIS_287aa
MNINKVFYHSSTNMNEVPDNSVDLIITSPPYFNIKDYAKNGTQDLQHSAQHVEDLGALEKYEDYLLGLLKVWLECYRALKPNGKLCINVPLMPMLKKVLNTHYNRHIFDLHADIQHSILHDLNNMLKNKPKMFLLDVYIWKRANPTKRLMFGSYPYPRNFYAQNTIEFIGVFVKDGKPKQPTEEQKEQSQLTQEEWVEFTKQIWEIPIPNKNDIAFGKHAALMPAELARRLIRLYSCVGDVVLDPFSGSGTTLREAKLLKRNFIGYELYENYKPLIEQKLGNLFDFE
>M1.Hpy32II_6mA_GRRGA_IIS_287_aa
MNINKVFYHSSTNMNEVPDNSVDLIITSPPYFNIKDYAKNGTQDLQHSAQHVEDLGALEKYEDYLLGLLKVWLECYRALKPNGKLCINVPLMPMLKKVLNTHYNRHIFDLHADIQHSILHDLNNTLENKPKMFLLDVYIWKRANPTKRLMFGSYPYPRNFYAQNTIEFIGVFVKDGKPKQPTEEQKEQSQLTQEEWVEFTKQIWEIPIPNKNDIAFGKHAALMPAELARRLIRLYSCVGDVVLDPFSGSGTTLREAKLLKRNFIGYELYENYKPLIEQKLGNLFDFE
>2ZIG_M.TthHB8ORF409P_N4N6_CTCGAG_297aa
MRSFPKAKEAFSEGEKVSFGVHRLHVGDAREVLASFPEASVHLVVTSPPYWTLKRYEDTPGQLGHIEDYEAFLDELDRVWREVFRLLVPGGRLVIVVGDVAVARRRFGRHLVFPLHADIQVRCRKLGFDNLNPIIWHKHTNASLEVEGRGVFLGKPYEPGAIIKTEIEYILMQRKPGGYRKPTQEQREKSRLPKEDFHRFFRQIWDDIPGESTKDHPAPFPLELAERLVRMFSFVGDVVLDPFAGTGTTLIAAARWGRRALGVELVPRYAQLAKERFAREVPGFSLEVLDGATHPRR
>M.TpaRLII_4mC_CTCGAG_297aa
MRSFPKAKEAFSEGEEVSFGVHRLHVGDAREVLASLPEASVHLVVTSPPYWTLKRYEDTPGQLGHIEDYEAFLDELDRVWREVFRLLVPGGRLVIVVGDVAVARRRFGRHLVFPLHADIQVRCRKLGFDNLNPIIWHKHTNASLEVEGRGVFLGKPYEPGAIIKTEIEYILMQRKPGGYRKPTQEQREKSRLPKEDFHRFFRQIWDDIPGESTKDHPAPFPLELAERLVRMFSFVGDVVLDPFAGTGTTLIAAARWGRRALGVELVPRYAQLAKERFAREVPGFSLEVLDGAVHPRR
>M.TbrGE1II_4mC_CTCGAG_293aa
MNAFQALPAAGVGTSKGHTLYVGDAREVLSRLPEASVHLVITSPPYWTLKRYEDVPGQLGHVEDYEAFLDELDRVWREVYRLLVPGGRLIVVVGDVAVARKRFGRHLVFPLHADIQVRCRKMGFDNLNPILWHKHTNAALEADRPGFFLGKPYEPGAIIKTEVEYILMQRKPGGYRKPTPEQREASRIPKDLFARWFRQIWDDIPGESTKAHPAPFPLELAERLVRMFSFVGDVVLDPFAGTGTTLIAAARWGRRALGVELVPKYAELAQKRFAQELPEARLEPLEVWRWSET
>M.Tam77409II_4mC_CTCGAG_297aa
MSPNPLRTLDQEPPGVLGEGSSPFPTTHRLLVGDAREVLRTLPEASVHLVLTSPPYWTLKRYEDAPGQLGHVEDYEAFLDELDRVWQEVFRVLVPGGRLIVVVGDVAVARRRFGRHLVFPLHADIQVRCRRIGFDNLNPILWHKHTNAALEADRPGFFLGKPYEPGAIIKTEVEYILMQRKPGGYRRPTPEQRELSRIPKELFALWFRQIWDDIPGESTKAHPAPFPLELAERLVRMFSFVGDVVLDPFAGTGTTLVAAARHGRSSLGVELVPRYAELARKRFGREAKGHSLVVEGV
>M.PhoI_4mC_GGCC_sp|O58333_PYRHO
MWVWNMVEIKIVFGSSENMEEIPDNSVHLVVTSPPYYNAPFDFPGLFSSYEEYLNLLRKVGKELMRVLQPGRYACFVTQDVRIEGKLYPIVSDLIHIMVHELGFEYQDKIIWRKPEGYIRISRRSGVLIQHPYPMYYYPDNIYEEVVIFKKPGKFDRSAVPPEIREKSKISISKFQAEKWYLSVWDIKNVLPHEKWSKYTAPFPEELAERLIRLYSYVGETVLDPFLGSGTTCVVSRKLHRNCIGYEIDLELREIIEERLGLTTKSLTNFIKTGEEDRVEILVRPDAKTLRRKLREEINRKLENKGRKS
>M.Tsp1633ORF686P_4mC_GGCC_308_aa
MVFVKVVFGDARNMGELQDGSVHLVVTSPPYYNAPFDFPGLFPSYGDYLDLLRGVGREIYRVLAPGRVACFVTQDVRVEGRLYPIVSDLIHIMVYEVGFEYQEKIVWRKPEGYIRISRRSGVLIQHPYPMYYYPDNIYEEIVVFRKPGEFDRTKVPEHVRERSRIDVRRFQVEKWYLSVWDIKNVLPSEKWSKYTAAFPEELVQRLVRLYSYVGETVLDPFLGTGTTCAVARRLERNCVGYEIDLELREVIEERLGIGKPSLTEYTRGADVKEVVVRNDARRLRTTLRERIERRLNEKNERSMRDNHS
>M.SuaI_4mC_GGCC_286_aa
MIKVIFGDSRNMSEVEDKSIGLVLTSPPYYNAPFDFPDLFPSYEEYLNLLRDVGKELYRVLDDGRVAVFVTSDVRIEGVLYPIVADLIRIMTDLGFKYQERIIWKKPEGYIRISRRSGVLIQHPYPLYYYPDNVYEDIVVFKKPGKFHTTNQEKSKIDVNKFQKEKWYLNVWEITNVLPNNKYSKFTAPFPEELANRIVTLYSYVGDTVLDPFAGTGTTLYVARILSRNAVGYEIDLELKEVIRERVGHPTLFDNHEVVFVERSDAKRLRTKLREKINEKLEKKSQ
>M.HsaR1I_4mC_CTAG_348_aa
MDETTHRVAVGDARDLPLAADAVDLVVTSPPYPMIEMWDAVFTDLDPEIGAALDAGAGERAHDRMHAVLADAWREVKRVLRPGGIAVVNVGDATRSVDRFRVYDNHARVTNAFADLGFDPLPGVLWRKPTNSAAKFMGSGMVPPNAYVTLEHEHLLVFRNGERRGFEPGADRRYEAAYFWEERNDWFSDVWTDLNGARQDLAEPGLRERSAAFPFALPYRLINMYSVYGDTVLDPFWGTGTTSVAAAVAGRNSVGVDADPEVVAAFADRITATPELSRAVAADRLAAHRAFVAETDDDALGYDAVNYDVPVRTNQERDLQLYTVADVEATTAGWRATHEPFVPTDDEA
>M.HtuI_4mC_CTAG_370_aa
METTHRVFVGDSRDLAAIDDDSVELVVTSPPYPMIEMWDDLFTRLDPAVGDALEAGDGRRAFDAMHAQLDRVWDELERVLVDGGIACINVGDATRSVDDSFRVYANHARVLEAFESRGFDPLPDILWRKPANSAAKFMGSGMIPPNAYVTLEHEYVLVFRKGGESRSFEPGADRRYEAAYFWEERNRWFSDVWTDVRGELQALSDEHDDLRDRSAAYPLEIPYRLICMYSAYGDTVLDPFWGTGTTTLAAMYAGRNSVGSELESSFLEVFDDRLGDVPALSRSVGRRRLERHREFVARRREEGKSFEYRAANYETPVVTKMERNLQLREVTAVDVLADADMSEGPADDETAADADAVHRYRAEHVPLTLE
>M.MjaI_4mC_CTAG_303_aa
MMSIDITTNHKIIFGDARKMDEIEDESVHLVVTSPPYPMIEMWDELFKMLNLEINKRWMEMENEEDEEKKEKLIMQIYNLMHQTLYPVWEEVYRVLVPGGIACINIGDATRKINGVFRLFPNHSKIIENFEKIGFVTLPYILWKKPSNKPNAFLGSGFLPPNAYVTLDVEYILIFRKGKPRKFKPKDPLRYASAYTKEERDRWFSQIWEIVGDKQTHPKIERRTASFPEEIPRRLIRMFSIIGDTVLDPFLGTGTTVKAAIELKRNSIGYEIDKSLKPIIEEKIGIKQKRIGMDFNVEFINRG
>M.Hka19301III_4mC_CTAG_352aa
METTHRVVTGDARELALPDDSVDLVVTSPPYPMIEMWDDIFAALDPAVEDALADEDGERAFRLMHDVLDTVWAEVVRVLRPGGIACINVGDATRSIGDGFRSFSNHAEITTRLTDRGLRALPDILWRKPSNRATKFMGSGMLPPNAYPTLEHEHVLVFRNGQRRTFPPGDDDRYESAYFWEERNVWFSDLWELTGERQAVEDGLRERSGAFPLELPYRLVSMFSTYGDTVLDPFLGTGTTTMAALVAGRDSVGYDRDDDLLAALDDRVEDASERSREIAERRLADHREWVQRRRAEGNEPGYEAEHYDTAVNTKQERRIRFYGVDGVERTDEGYRATHSPIEACPDGESEQA
>M.Dco13527I_4mC_CTAG_404aa
MYNLYKESQALLATTHKIYFQNSQDQSAVDSETVDLVVTSPPYPMIEMWDDIFSKQDQRIEDALNNKDGNLAFELMHQAMDSMWKETFRVLKDGGFACINIGDATRTINGNFALYPNHARIISSMTSLGFTPLPDIIWRKQTNAPNKFMGSGMLPAGAYVTFEHEYILIFRKGSKRDFSDVADKERRRESAYFWEERNLFFSDVWFDIKGTVQSMKKTEARSRSAAFPFELAYRLIAMYSAKGDTVLDPFMGTGTTMQAAVASARNSIGFEIDENLRDEIFGIKDYAVDFSNKYINDRLERHVGFVEDRLKNGKEIKHINSFYDFPVMTNQEKNLLLNELKDIRLVDEDLLEVSYSEEPGRKFTEDLAVDGSEAKTDPVEKPKKDKKQKNGKDKAGKGQ…
>M.Djo10085I_4mC_CTAG_372aa
MKDLPGNSVDLIVTSPPYPMIEMWDPVFTDQDPKIGQNLKKGEGQKAFEAMHRILDPVWEKCFRVLRPGGFACINIGDATRTIKERFSLYTNHARILSAALDIGFSALPCIIWRKQTNAPNKFMGSGMLPSGAYVTLEHEYILILRKGGKRIFRSGREKEIRHESALFWEERNTWFSDVWMDLKGTTQSLGDKAERKRSGAFPFALAYRLINMYSVKKDRVLDPFLGTGTTMAAAMAAGRNSLGYEKDPSLDTVLKRSLEDLPALAREIIRDRLIRHLQFVARRVEEKGPMKHINTPYGFPVMTSQERELILNTPLHMTLSDDGRYTLEYDPRPQEEFCRDWAALFAPASEARIKIPRHSEPAKGIKQGSLF
>M.BglII_4mC_AgATcT_PB_360_aa
MSEDQYKQIKLHLGMEDDNEDLPNHIPSSFPKQHLNKIYNGDTMNMLLDIPDNSVDLVVTSPPYNINKFKNDRRPLEEYLKWQTEIIEQCHRVLKPSGSIFWQVGTYVNDSGAHIPLDIRFFPIFESLGMFPRNRIVWVRPHGLHANKKFAGRHETILWFTKTPEYKFFLDPIRVPQKYANKKHYKGDKKGELSGDPLGKNPGDVWAFRNVRHNHEEDTIHPTQYPEDMIERIVLSTTEPNDIVLDPFIGMGTTASVAKNLNRYFYGAEIEKEYVDIAYQILSGEPDENNNFPNLKTLRQYCEKNGIIDPSQYTFTRQRKGSKPSLDSKAHPEEHHKKEIVERIEFEAENSVYKKVQNEQ
>M.Mru1279V_4mC_RGATCY_313_aa
MISRAMTELSIKNRFDSEAYVVIYPGDCTELLKQIPDASISLVITSPPYNIGKPYESRKALDAYLAWQEGVVKESVRVLKPTGSLVWQVGNYVDNGEILPLDMLLFPIFTNLGLKLRNRIVWAFEHGLHAKRRFSGRYEVALWFTKTDEYTFNLDSVRVPQKYPNKKHFKGPKKGELSGNPLGKNPGDVWVFPNVKANHVEKTGHPAQYPVELVERFVLALTEEDDWVLDPFGGSGTTLIAALMHRRRGAMAEIIPDYVEIAQQRLREAWEGRLRVRPMEREVYDPSGKGAYIPPRAVDLQAIWNPPLLVEPK
>M.BstYI_4mC_RGATCY_318_aa
MNFLSLFEYRIDDVYKEDSEIVFHNGDALEFLKTLPDNLVKLAITSPPYNVGKSYEVKTSVEEYLATQEAVIEELIRVVDDHGSICWQVGNYVNKGEIFPLDIFYYQIFKKHGLKLRNRIIWHFGHGLHAKKRFSGRYETLLWFTKSDDYTFNLDPVRVPAKYPGKRHYKGDKKGELSGNPKGKNPSDVWEFVVQEWDKELWEIPNVKANHPEKTIHPCQYPIELVERCVLALTNENDFVLDPYAGVGSSLIGALKHGRKAIGVDKEKEYVEIGKQRIKDFYDGKLKIRPLGKPVYQPTGREKVAQIPEEWKELLEQK
>M.CagIII_4mC_RGATCY_329aa
MRDVPLFRSIKPIETGFKPDAEIVLFSGDVSELLTQVPDNSVALIVTSPPYNLGKEYEDRVSIEQYLKTQAQVIAQLHRVLREDGSICWQVGNFVENGEVYPLDVLYYPIFKELGMRLRNRIIWKFGHGLHASRRFSGRYETILWFTKSDRYVFNLDAVRVPAKYPGKRHFKGPNKGKPSGNPLGKNPSDVWEILVQDWEELVWDIPNVKSNHPEKTVHPCQFPIELVERCVLALTNEGDWVFDPYMGVGSALIAALMHDRRAMGCEKEAAYVEIARQRIVDYFNGTLRYRPMGKPVYQPTGKEKVSQIPEEWKEPSQVRLLEEQGEYE
>M.Mpa1757V_4mC_RGATCY_317aa
MNQLPLFSQSKSVRDFYQPDAEIILYQGDSNNFIKTIPDNSVSLIITSPPYNLGKDYEKKISLDTYLETQTKIMREFSRILQDNGSICWQVGNFVQEGEVYPLDIFYYQLFKQMGFFLRNRIVWHFGHGLHTSKRFSGRYETILWLTKTDKYTFNLDPVRIPAKYPGKRHFKGKNIGKPSGNPLGKNPSDVWEFLAQEWDELLWDIPNVKSNHPEKTIHPCQYPIELVERCVLALTNEGDWVFDPFAGVGTSLIASIMHNRRVMGSEKEAEYVKIARERITDYWQGNLKIRPLGKPIHQPNGKEKVAQIPEEWHNNI
>M.RsaIII_4mC_RGATCY_293aa
MRKLPRSSVQLVVSSPPYNIGKIYERDQKLSLEAYLSWQAEIISEVADLLVDGGSVCWQTGNYVSNGELFPLDVHFYSIFKEKSFKLRNRIIWKFNFGLNADKRFSGRYETLLWLTKGDNYKFNLDPVRVPQIYPGKRHSLNKGAKAGLPSGNPLGKNPADVWEFSAEKDFVVNPVWDIPNVKNNHPEKTSHPCQYPVELAERCVLALTDKGDTVLDPFVGVGSTLLAAAKHGRVGIGIDREPEYIEIAEDRLRKFRSGELITRPLGKPVRRPRESESVARVPDEWLKQGGDA
>M.ScaI_4mC_AGTACT_304_aa_sp|O52692.1|MTS1_STRCS
MSGRDFGYVIQSSAALWNRLSTFSQRGKALDTRLADIKKALGKPYYETSDVLLYHGDSLELLKSMPQQIFDLTVTSPPYNIGKEYEGVLSIEEYISWCETWMSRVHRATSAGGAFWLNVGYVPVPNQGKAVPIPYLLWDKSPFYMIQEVVWNYGAGVASRKSFSPRNEKFLWYVRDPLNYYFDLDSVRDPNVKYPNQKKNGKLKCNPLGKNPTDVWQFPKVTSGAKRSSVERTAHPAQFPSAVIERVIKACSPSDGVILDPFLGSGTTSLTARKQGRCSVGIEIREDYLDIAVGRLEAEAQSLF
>M.NmeSI_4mC_AGTACT_283aa
MNTISSIMSLENFQLIKTQLGVPSYENDRVAIYQGDCIQLMDKISKGSFQMTITSPPYNIGKEYESILDLEHYLEWCERWMQSIHHLTEDSGCFWLNLGYLHVEKKGLAVPIPYLLWDKTNFFLLQEVVWNYAAGVACRNRFSPRNEKLLWYVKNPAKYTFNLDAVRDPNVKYPNQKKNGKLKCNPLGKNPTDVWQIAKVTSGRNRSSRERTAHPAQFPLELIERIIRASSNQNDVILDPFIGSGTTALAGLKNNRFVIGFEINDEYIDIIKERFKEYDLQNT
>M.AspWA102ORF11190P_N4N6_AGTACT_283_aa
MNLTDISKLLGKPYFQASNCLIYNLDCLEAMTILPDESINLTVTSPPYNIGKEYENLLPLDDYINWCEQWIKEVYRLTLCDGAFWLNLGYLSIKNRAKAIPISYLLWDKIPFYLIQEIVWNYGAGVAGSKFFSPRNEKFLWYVKNSEAYTFNLDDIRDPNVKYPNQKKNGKIRVNPLGKNPTDVWEFPKVTSGQNRSSKERTPHPAQFPSAVIQRIIQASSNQNQIILDPFLGSGTTAMVALDLNRLVIGFEIRQDYCDIAANRIETFLKEQSCQVEQMSLFL
>M.BamLL3ORF2262P_N4N6_CAGCTG_278_aa
MKINELKFNEIYKIDCLDGLKELKNESIDLIVTSPPYADRREGEYKSIKTSEYVNWFIPIAKELYRVLKPSGSFFINIKSHCSKGERELYVYELVIALKKELGWRFVDEFTWTKNGVPGRFKGRFKNGFEPIFHFAKSSEIVFNPYAVGVPMKEESLKRANRKATGLTKNGSGFAGMRRNETMVNRSLALPSNHLHIPQKSNQYTLQSKHPAVFPVELPEFFIKAFTNEGQVVLDPFMGSGTTAIASEMLGRKWIGFETEAKYIEIANERLRGYANSK
>M.CagORF3337P_N4N6_CAGCTG_345_aa
MTRINTTSPFRALPAPVYTTRYGACYLGDSLDLLKRLPDDCVDLVVTSPPFALLRQKAYGNTDQSEYVEWLCRFGAEVRRVLRETGSFVLDLGGAYQRGVPVRSLYQYRVLLKMCDEVGFYLAEEFFWYNPAKLPSPIEWVNKRKIRVKDSVNTVWWFSKSEWPKADVRQVLAPYSERMKTLLKNPDAFYKPKNRPSGHDISKGFGSDNGGAIPSNLLQIPNTESNSSYLRLSKLVGIEAHPARFPAALPEFFIKLLTTEGDLVLDIFAGSNTTGKVAEQFGRRWIAMEIDAGYVAGSALRFMEHLPQSEVAACFARLSVSSRSAPVDLSGPATLFDEAKVERGT
>M.Mre10914ORFJP_N4N6_CAGCTG_359_aa
MGNYSGFYVLHSFRSYSIQLKLAIDKQSLETLKGCLVVADDIQTQIRRPPISEALELLTQEHLTPQKTLNFTPYYLQKNGAAYLGDSLKLLTFIKDNNINLILTSPPFALTRKKEYGNESAEKYIEWFLPFAYEFKRVLAENGSFILDLGGAYLPGHPVRSIYQYDLLLRLCKEVGFFLAQEFYHYNPARLPTPAEWVTIRRIRVKDSVNVVWWLSKTPHPKADNRKVLKPYSQSMKQLLKNGYKAKIRPSGHDISEKFQKDNQGAIPPNLLELANTESNSAYLRRCKAAGIQPHPARFPQSFAEFFIKFLTDEGDIVLDPFAGSNTTGFVAEILQRKWISFEMNEDYIIGSRYRFEDS
>1BOO_M.PvuII_4mC_CAgcTG
MLNFGKKPAYTTSNGSMYIGDSLELLESFPEESISLVMTSPPFALQRKKEYGNLEQHEYVDWFLSFAKVVNKKLKPDGSFVVDFGGAYMKGVPARSIYNFRVLIRMIDEVGFFLAEDFYWFNPSKLPSPIEWVNKRKIRVKDAVNTVWWFSKTEWPKSDITKVLAPYSDRMKKLIEDPDKFYTPKTRPSGHDIGKSFSKDNGGSIPPNLLQISNSESNGQYLANCKLMGIKAHPARFPAKLPEFFIRMLTEPDDLVVDIFGGSNTTGLVAERESRKWISFEMKPEYVAASAFRFLDNNISEEKITDIYNRILNGESLDLNSII
>M.AspJHL3I_4mC_GAGCTC_322_aa
MSTVTQEQEDLFAASLKPPTELVKGSKPFFKSKKGLVYHNDSLEILKKIPDNSVNLVFTSPPYALHFKKEYGNADQADYVDWFLTFAQEIKRILTDDGSFVLNIGGTWQKGQPTRSIYHYKLVVAMVETLGFHLAQECFWYNPAKMPVPAEWVTVRRIRVKDAVEYVWWFSKTPWPKADNKKVLRPYSKDMLRLAAKGVKTTVRPSGHNIDKWDKLHSGGSIAPNVIDDEIPTEMLKMGNNSANDVYTKKCKEAGIKIHPARFPAQLPEFFIKFLTNEGDIVLDPFGGSMTTGSVSETLNRRWIGIDNVEEYLDGAKFRFG
>M2.Psp32OWII_4mC_IIS_GAGCTC_PB_293_aa
MLESINRFITGKCEDVLAHFPDNCIDFIITSPPYADRRFYGTDESKIPPDEFVEWFLPKAAEMKRVLKETGSFVLNISDKVVNGVQHLYVYELVIRMSKELGYNLVRDYIWYNPSTPPNVFSSGRFGRTKKSHEYCFWFSKSDTWTFNMDPIRKPYSKDMQKYLNGNGKGNRNYNTRPSTHNFNCEKVWSDKGGSDPGSVIEIGNTSSNDSFIKMCKEKGIAHPARFPEKLVEFFILSGTNEGDIVLDPFSGSGTTAVSAHRNKRHWIGIDANKDYCDLAYERMKLEFPEDFE
>M.Nca01I_4mC_AGCT_281aa
MIYCLISLLTNEIINLETIFNLKMKKVEINKIYNENCIDGMKLIPKNKINLVITDPPFAINFKAKKANYNRTASRVLSGYNEIKPEDYYDFTFSWMSEVFRILKDSGSMYVFSGWNNLKDILRALDDVGFITINHIIWKYQFGVVTKKKFVTSHYHCLYVCKDDKQRKFFPFSRFKKDDKSEDGRSLHYRDKEDVWDIKREYWSGDEKTPTKLPSEIIKKLLEYSSEKKDIVFDPFLGSGQTAVVSKSLNRRYLGFEIVPDYYKFAKKRLDKNLYRIKQSK
>M.NoxHCE1I_agct_258aa
MKKIEINKIYNQNCIEGMKLIPKNKIDLVITDPPFAINFKAKKANYNRTSSRVLSGYNEIKPEDYYDFTFAWMSEVFRILKDSGSMYIFSGWNNLKDILCALDDVGFTTVNHVVWKYQFGVVTKRKFVTSHYHCLYVCKDDKKRKFFPFSRFKKDEKTKDGRSLHYRDKEDVWDIKREYWTGDEKTPTKLPSEIIEKLLEYSSEKNDLVFDPFLGSGQVAVVSKSLKRKFLGFEIVPDYYKFAKKRLDTNTYRIKKSK
>M.Mma5219II_4mC_AGCT_336_aa
MKPVDIYGNVFYNEDCITGAATHIPDESVDLIITDPPYGIKGDKLHQHYNRDENFVVDGYVEIPEAKYADFSLAWIKEAERILKPGGSIYIVSGYTNLYHILHALYQTNLEEINHIIWKYNFGVYTKTKYVSSHYHILYYQKAGKSRTFNLESRYGTCEKTEDGRSLNYRDREDVWIINREYKPGKVKNKNELPHKLLKKIIQYSSNEGDLVCDMFLGGFSTPTVAIGLNRRCTGFEISETMFRAKTREIDQSNVIKPGFMVPELREPVIKNLENQGRPWTSKEEDYLLTRYRELRQSGQNKKDTIEIIGEELGRGRWSIEKAIKKISKKDDNRQS
>M.MhuIV_4mC_AGCT_329_aa
MRSFTTSHGIFYNGDCIKGAALIPDNTVDLIITDPPYGIEGDKLHRHYNRDESFVTDGYVEIPAEEYESFTRDWILQAERILRPGGSLYIVSGYTHLRHILNALYETSLEEVNHIIWRYNFGVFTSLKYVSSHYHILFYAKPGGKRTFNTECRFSLSEKDENGGSLNYQDREDVWIINREYKPGKVKNKNELPTALLSKIIQYSSNEGDLVCDLFLGGFSTAKTAIGLLRRATGFEISPVMYDAKIDEMMAVVPGFLLDTAQTPKEPSRKRTRKAWNPEETEQLRKRYNELNQTSLSQKEVNQQLQEEFDRGYWSIEKALKQTGIKPGR
>M.HciORF1543P_N4N6_GATC_276aa
MEWNKIYNDDTLKILKSLPNECLDMIWSDPDYNVGINYNGSKYTQKWEDYISWYCELATQCLRVLKPSGNLFLMNYPKQNAYLRVKCLDSLAYDVSEYVWVYNTNVGHSKRRLTTAHRSIIHATKSKNNHFYKDNIALPYQNPTDKRILQRLADGHKGRMPYSWFYFDLVKNVSKDKTFHSCQIPAPLVEMFIKSCTNEGDSVFVLFGGSGGEILLSENLKRKWISCEVHKPYFEMINDRLQSNGTIKNEFRLPNFARKNNENSANKEQSLFENAL
>M.SliSI_4mC_gATc_264_aa
MPVLSGYLDKVFLMDTMDLLRELPDSSVDMVFGDPDYNVGVKYRGKSYKRSFDEYIEWYVELARESLRVLKETGNLFFINYPKQNAYLRVKYLDEACYEVHDYAWVYNSNVGHSPKRFTTAHRSILHARKTKNNDFYKENVAQPYKNPTDRRIRSNLANGSRGRMPYDWFYFDLVKNVSREKTYHACQIPQKLSELLIKSCTRPGDVVLILFGGSGSELEVCKRLDRRYISAEVDPDYHRMILHRLENGVTEEYRLINRGKKSN
>M2.HmuST1ORF8940P_N4N6_GATC_266aa
MQFNKLYNSDVLGILKSLPNECLDMVYGDPDYNVGTNYNGSKYTQKWEDYIAWYCELARESMRVLKPSGNLFMMNYPKQNAYLRVRCLDSIAYDVQEYYRCYNTNVGHSKRRLTTAHRSILHATKTKDNHFYKDNIALPYQNPNDKRIRQRLAQGEKGRIPYSWFYFDLVKNVSKDKTFHSCQIPLGLVEMLIKSCTNEGDCVFILFGGSGGEIVLCEKLKRKWLSCELHKPYYEMILDRLANKGEIKDEFRLQKFQNLNNQRSLW
>M.Msc457ORF667P_4mC_GATC_269_aa
MINFNTLYLEDTLKILKQIPDNSLDMVYGDPDYNVGINYNGNKYTKSWDKYIEWYCELASESIRVLKPTGNLFLINYPKQNAYLRVKCLDNICYKVYDYVWIYNSNVGHSPSHLTTAHRSILHATKTKNNNFYKENIAVPYQNPTDKRIMQRIQNGSTGRMPYSWFYYDLVKNVSKDKTFHACQIPQKLVEMLILSCTQKNDTVFILFGGSGGEIIQCEQLSRKWISCELNQEYYQMILDRLENNGDIKIEYKLQNKRNKYTSLDYINQ
>M.BamHI_4mC_GgATcC_423_aa
MTKVELELKLGRIPAGLEDVFLNNTKEIAKILENKNSVKLNEFNSIQEIKPYFYTDLGKLYNGDCLELFKQVPDENVDTIFADPPFNLDKEYDEGVTDKNSFSGYLDWYYKWIDECIRVLKPGGSLFIYNIPKWNTYLSEYLNRKLNFRNWITVDMKFGLPIQNRLYPANYSLLYYVKGDKPKTFNVQRIPLQTCPHCGREIKDYGGYKNKMNPKGVTLSDVWSDIYPVRHSSSKNRKFNELSVKLLDRIITMSTNEGDVVLDPFGGSGTTFAVSEMLGRKWIGFELGNCEIIKERLKNKDKDKKLLGKVYEEKNKLFPNRVKELRKKNGLWIDDDFRQDHEGNSKGDKKNENNDQISLSLE
>M.Bsp98I_4mC_GGATCC_388_aa
MNSIERQLPEPDFATPLGRLFNADCIQTMRNMNDNTIDLIFADPPFNLDKKYESGMNDKISKTEYLNWTEEWVTECVRILKPGGALFIWNLPQWNTYTAEILNRNLNLRHWIAADVKYSLPIANKLYPAHYALLYYVKGDKPNTFNREGLPLEICRHCAGDIKDYGGYKNKLNIEGMSLTDIWHDISPVRHKKYKNRDSNELPLNLLERIISMCSIEGDLIFDPFGGSGTTYIVSEILNRHWIGTEIGPIIGIEERFNQIEFAKLKINDIQSKKNQLFTDEMKNFRRKNGHWLPETL
>M.DdsI_N4N6_GGATCC_285_aa
MNNNDLTDDLFLTSPTITPHFQTKYGIMLEGDCINILKNIKSNSVDTFFADPPFNLNKKYGVKSNDNKYDKEYIEWCYSWISEGIRILKPGGAFFIYNLPKWNMILGSYLTSAGLLFRHWIAVSMKLSLPIPKRLYPAHYSLLYFTKGAPKTFNKIRTPIELCRHCGKEIKDYGGHRKSMNPNGVNLSDVWNDIAPVRHHKFKHNKRTENQLSTKLLERIILMTTNEGDIVVDPFGGGGTTFAVCEAKLRRWIGIEIEDITPIKERIELKYDLHYNSDYVEESSK
>M.Sen1853II_4mC_GGATCC_418_aa
MPSGKDLSILCEEFNISPVYFQLMMGHMDMHTLELIQENASFIYEKILSPNITVTGESSFEKDFELVLQTKNGELYNGDCLKVSKNIDADSVDMIFADPPFNLDKLYPSKMNDNLKEEEYIKWTHDWLNECIRILKPGGSLFLWNLPVWNSKIANFLHGRLNFKHWIAVDMKNNMPIQGRLYPSHYSLLYFIKGEKANVFEPDRLAAQTCPKCFGDLKDYGGYKSKMNPLGINLTDVWYDIPPVRHKKYKKRNGANELSIKVLDRVIEMATKEGDLIFDPFGGSGTTYVIAEIKNRRWIGSEIDDCEIIKERFSNLSEDKEHLVEVRGKLNSLFPSTIKRERERRGLWTVESVRMKDDEKKTANEHFGLLQNEEK
>M.NspKEnV_6mA_TCCGGA_339aa
MSELNFIILRYTYNNKYYYDIRNISLMVQYMYGYIRVAEQQSSEEELQPLTQGFQLQYTHPHGQLYQGNSIDWLASLDSESVDLVFADPPYNIKKADWDNFENQEKYIEWSIQWISQASRILKSTGSFYICGFSEILADLKHPASKYFKNCRWLIWHYKNKANLGSDWGRSHESIIHFRKSDAVKLNIDDVRIPYGAHTLKYPSHPQAETSAYGKGAIKKHKNWTPNPKGAKPKDVIEIPTTCNGMGETTPHPTQKPEELLRKFVLASSKEGDLVVDPFSGSGTTLVVAEQLNRRWMGCDLNIEYNCWATRRLENVRRMTKEEWIAFDRKNAERRESIR
>M.AccIII_6mA_TCCGGA_359_aa
MDDYLSIKEAAKLLDVNSETLRRWDNSGKFKSLRHPINNYRVYTQQQIDSFVNEIAFDNYSYIPKLKLYSEIELKPFFISKNGSLFNVDAIDFLRKLESNSVDLIFADPPYNIKKAEWDIFSSQNEYLEWSKEWIMEAHRVLKDNGSLYVCGFSEILADIKFITSKYFHSCKWLIWFYRNKANLGKDWGRSHESILLLRKSKNFIFNIDEARIPYNEHTVKYPQRTQAESSQYSNSKKQYIWEPNPLGAKPKDVLEIPTISNGSWERSIHPTQKPVELLKKIILSSSNKDSLILDPFGGSGTTYAVAEAFGRKWIGTELDKNYCLEIQKRLKDESMINRIFSGDDDSNSQNRRKKLRGE
>M.CagVI_6mA_TCCGGA_304aa
MLKGTMFDSNESQIDPNTPTLFYSHPHGEIWVGDAIAWLRSLETESVDMIFADPPYNIKKAEWDTFESQEEYVEWSLLWIREAARVLKPSGTLYICGFSEIIADLKLPASRLFKGCRWLIWHYKNKANLGSDWGRSHESILHFRKSKNFTFNIDDVRIPYGNHTLKYPEHPQAETSQYGKGNGRKNTIWQPHPRGAKPRDVIEIPTTCNGMHEKTPHPTQKPEELLRKLVLASSNVGDLIVDPFLGSGTTAVVAEQLRRNWKGCDISLEYCRWAVRRIELVEDWPIEKWIQYDFENAERRKSIR
>M.Apa101655II_6mA_GANTC_367_aa
MSGAKSASMELPLDQILRGECVETMRSLPSGSVDCVFADPPYNLQLRGELRRPDDTLVDGVDDDWDKFSDLEEYDRFTRAWLAEARRVLHKDGTIWVIGSYHNIYRIGAILQDLGFWILNDIVWRKSNPMPNFRGRRFTNAHETLIWAARGQDSRYRFNYQAMKALNDDVQMRSDWYLPLCTGNERLRNEHGLKLHPTQKPESLLHRVLLASTTVNDVILDPFSGTGTTAAMARRLRRHFIGIERHPDYVEAAMARVAAETPLEADAVQTTQDKREAPRIPFGSLVEQGVIAAGTVVCDKKRRVHATVSPDGTLVNGTKRGSIHKLGAQLTNAPSCNGWTFWHFERAGELLQLDVLRQETLQKTAQA
>M.OanORF605P_6mA_GANTC_377_aa
MSLVRLAHELPIEAPRTAWLDSIIKGDCVAALERLPDHSVDVIFADPPYNLQLGGDLHRPDQSMVSAVDDHWDQFESFQAYDAFTRAWLMACRRVLKPNGTIWVIGSYHNIFRVGSQLQDLGFWLLNDVIWRKTNPMPNFRGRRFQNAHETLIWASRDQKGKGYTFNYEAMKAANDDVQMRSDWLFPICTGSERLKDENGDKVHPTQKPEALLARIMMASSKPGDVILDPFFGSGTTGAVAKRLGRHFVGIEREQSYIDAATARIDAVEPLGKAELTVMTGKRAEPRVAFTSVLEAGLLRPGTVLCDERRRFAAIVRADGTLAANGEAGSIHRIGAKVQGFDACNGWTFWHYEENGALKPIDALRKVIRDQMAVAGA
>M.ZmoIII_6mA_GANTC_382_aa
MRLAECVSRMSEEDIGGDTELSDSPTLPLNSILAGNCIEILKTLPDNSVDLIFADPPYNLQLSGELFRPEGSRVDAVNNAWDKFDTFAAYDHFTRLWLKEAHRVLKEDGTIWVIGSYHNIFRVGTALQDQGFWILNDIIWRKSNPMPNFKGRRFTNAHETLIWASKSDKSRYVFNYASLKTFNDDLQMRSDWLLPICSGNERLKGENGQKIHPTQKPEALLYRIILASSRPDDVILDPFFGTGTTGVIARHLRRHWIGIEQDPTYIKAAQARIDKAEVFDEALMGQASNKRKQPRVTFGCLMENGFIRPGHILYDSRRRFKAVVNVDGALQSADGRSGSIHKLGAQLQQAVSCNGWIFWHFEENNILLPLDILRQRYLAENP
>M.HpaI_6mA_GTTAAC_sp|P29538.1|MTH1_HAEPA
MDQRLICSNAIKALKNLEENSIDLIITDPPYNLGKDYGTTDDNLNFNKYLEFSHEWLEECYRVLKPHGTIYIFMGMKYISYIYKILEQDLGMYFNSWITWYYTQGIGKTRGYSPRHDDILMFTKHPKKFTFNLDRIRVPQKYYRSVNNMRGANPSNVWEFSHVHYCNKNRKPHPTQKPEALYERMILASSNEGDIVLDPFVGSGTLNFVCKHLNRSGIGIDINKEYIEMAKERLDSEFNGFDSIDERMKRCPNDLSDPVIRKQYIINHINWFLKNHENAREEFLNEVKTKYYKKMTQEEKRLLDKENNLSFDFS
>M.PbaD3I_6mA_GTTAAC_303aa
MSNTRLITGDAVKQMQEIDSSSIDLIIADPPYNLGKNYGNNYDAKKFDEYLSFTNSWLQQAHRLLKYNGTVYVFMGFRFISYLFNILERDLKMYFRNWIVWHYTQGIGKTKGFSPRHDDILMFTKSDEFKFNLDAVRVPQKYYRERNNMRGANPGDVWEFSHVHYCNGNRQNHPTQKPEGLIERMVLASSCKGDRVLDPFSGSGTTLRVCQQLKRDCIGIEINSDYVKMTQKRLSEPFKGFDSVDPRMERVPLDLRRPDIRDEYLENHKKWFLSNHENAMKKFVQSVESVYGDQSSKQLSLFE
>M.Mwh3033I_6mA_GTTAAC_308_aa
MTDLKLIAGDAVQQMQDIRSESVDLIIADPPYNLGKNYQNNIDKKTFDEYLVFSKEWLTEASRVLKPHGTIYVFMGFRFISYLYDILERDLKLHFHAWIVWHYTQGMGKTKGFSPRHDDILMFTKSSSFTFNLDDIRVPQKYYRQRNNMRGANPGDVWEFSHVHYSNPNRQDHPTQKPEGLIERMVLASSNEGDLILDPFSGSGTTVRVCQQTNRNAIGIEINPEYVEMTKRRLSEPFYGFDSVDPRMERVPNDLRDPIIRDEYLINHVNWFLRNHKNAISDFQKAVKEKYGIKIDERGNVEPQESLF
>1G60_M1.MboII_6mA_GAAGa_260_aa
MLEINKIHQMNCFDFLDQVENKSVQLAVIDPPYNLSKADWDSFDSHNEFLAFTYRWIDKVLDKLDKDGSLYIFNTPFNCAFICQYLVSKGMIFQNWITWDKRDGMGSAKRRFSTGQETILFFSKSKNHTFNYDEVRVPYESTDRIKHASEKGILKNGKRWFPNPNGRLCGEVWHFSSQRHKEKVNGKTVKLTHITPKPRDLIERIIRASSNPNDLVLDCFMGSGTTAIVAKKLGRNFIGCDMNAEYVNQANFVLNQLEIN
>M1.HpyAII_6mA_GAAGA_260aa
MILNKIYIEDVFTFLDKLEDKSVDLAIIDPPYNLKIASWDSFKNDEEFLTFSYAWIDKMLPKLKDTGSFYIFNTPFNCALFLAYLHHKKVHFLNFITWVKKDGFANAKKRYNHAQESILFYSMHKKNYTFNADEIRIAYESAERIKHAQSKGILKNNKRWFPNPKGKLCLDVWEITSQRHVEKEKGKILKPKHPSIKPKALIERMIKASSHKNDLILDLFSGSGMTSLVAKSLERNFIGCESHAEYVHGSLEMFRYNECE
>M1.HpyG272II_N4N6_GAAGA_260aa
MILNKIYIEDVFTFLDKLEDKSVDLAIIDPPYNLKIASWDSFKNDEEFLTFSYAWIDKMLPKLKDTGSFYIFNTPFNCALFLAYLRHKKVHFLNFITWVKKDGFANAKKRYNHAQESILFYSMHKKNYTFNADEVRTTYESTERIKHAQSKGILKNNKRWFPNPKGKLCLDVWEITSQRHVEKENGKILKPKHPSIKPKALIERMIKASSHKNDLILDLFSGSGMTSLVARSLGRNFIGCETHAEYVHESLEMFRYNEYR
>1NW6_RsrI_6mA_GAatTC
MANRSHHNAGHRAMNALRKSGQKHSSESQLGSSEIGTTRHVYDVCDCLDTLAKLPDDSVQLIICDPPYNIMLADWDDHMDYIGWAKRWLAEAERVLSPTGSIAIFGGLQYQGEAGSGDLISIISHMRQNSKMLLANLIIWNYPNGMSAQRFFANRHEEIAWFAKTKKYFFDLDAVREPYDEETKAAYMKDKRLNPESVEKGRNPTNVWRMSRLNGNSLERVGHPTQKPAAVIERLVRALSHPGSTVLDFFAGSGVTARVAIQEGRNSICTDAAPVFKEYYQKQLTFLQDDGLIDKARSYEIVEGAANFGAALQRGDVAS
>M.Ssp6312ORF849P_N4N6_GAATTC_327aa
MANKSHFNSGHMAINQLKKNGALHSSTITGISTPHTVHGVFIQDAVDFLKALPDSSVQLILIDPPYNLDLDNWDSFHNYLDWAKGWLDQICRVLSDSGNCVIFGGFQYQDLKKGDLLEVLHYTRHKTALRFVNLIIWYYKNGMSAHRFFANRHEEAVWLSKTKKYYFDLDSVRVPFDDATKEMYKKDKRLNPESIDKGKNPTNVWEIGRLNGNSTERVGHLTQKPVELIRRFVKALSFEGSIVLDFFAGSGTTGRVCIEERRHSLLVDSDNKLYGYLDKHISQIQPNLFLPEYRLMKDTNINTVLEEISWVNQQLPQNILDKDYLNE
>M1.Pdi8503IV_6mA_GAATTC_315aa
MPNKSHFNNGLRTLVQQARDGIEHSSAVHVRNFDKTFHAVYIQDAVKFLKTVPDSSVQLVLIDPPYNLELDYWDSFPNYLDWAKQWIDEIYRIMSDNGNCVIFGGFQFQDLKQGDLLEILYYIRHNTNLRLINLIIWYYKNGMSAHRYFANRHEEAIWLSKTKKYYFDLDSVRVPYSEEAKKAALKDKRLRPENIEKGKNPTNVWEIGRLNGNSTERVGHPTQKPTEIIRRLVKALSYEGSLVLDFFAGSGTTGRVCIEENRHSIMVDSDNSLKRYFEMHRKKMSGTSFKPYEICENIEIEKFLEKVNKEETYTK

## Sheet: Data_S2
Supplementary Data File 2. Amino acid sequence alignment of SETDB1 proteins from the phylum Rotifera and three representative protostome phyla, with accession numbers from Genbank (.fasta format).
>Av_s314
MMTTLENLQDGNLSSSVFDSPCPSVASDKQDVVIVVDEDESDIEIDEESTIHINEKYQQCAAKYLINKLDLHAEIIIVKPNLPVRVCRTAIPYTNLRDVQIITIDNPQTSKPEHVTKRQIYMNEPCSSTTIPIRSRVFHRATSLLGFVLELPCITTNNNRYLVLYDDFTACYHSYGELHLCLCQDFRRHLLNIDYKDLRDYYQQAFKNLNKSMQITYSLDSIIRVKKFGAQYHNVRVIEVDYSLLKTCFFERKSKKEIWIYCNSSIIERTQPIIELPIVTVSENPPTPTDETIEPCADLPRLRKRQNDDNNNNSNKKDRKKLRDRSNTKQPILSSNDDLSSATRHNIVTAYYTNVLFPKFRVLNTLPSTVHKCGRQCVISAEETFCPSKIRTNPFLLPF…
>AvL1_314
MSSSVFDSPCPSVASDKQDVIIVLDDDDENDIEIDEESSISINETQQRQQYLTTHQIDKLDIHAEVLVVKPNLPVRICRTAIPYKNLQDIHIMTVQNLQTSTIEHVTKRQVYTTKPCSSSDIPIRSRVFHRITSLLGFILETPCLTTNNNRYLVLYDNFTACYHSYSELHPCLCQDFRRHMLNIDHKDLRNHYQQAFDSLKKSTQTIHPLNSIIHVRKFGSQYHNVRVTDIDYFLIKICFFERKSSKEMWIHCNSSIIEPSQPSIQSPTEIIPMNIPTPTDESTDSCSDLPRLRKRKKDENNKKGGKRLRDRSNIKQVSIPTNDDLSSASRHVIVTTYYTNILLPKFRVLNALSSTVHKCSRQCVLTAEETFCSNKIQTNPFLSPFECQWSIVDSKPRG…
>Ar_s16
MVICLHLFLTVHDKQDVIIVLDDDDSDIEIDEISSTNVNEKQRQSQYAVKMKMNKLNLHEQIIVVKANLPVRVCQTAIPYPDLEDIHILTVNLTPHSAIPEHVTKRQVYMNEPCLLSDIPSRSRVFHRATSLLGFVLEAACATTNNYRCLVLYDDFTACYHSSSDLHLCLCQDFRRHLLNIDFKELRNHYQKVFNDSQNATETSHVMNSVIRVRKFGGQYHNVRVIDIDQLLIKICFFERKSKKEMWIHCNSSIIEQSQPNTQSLIELIPVDPPTPTDDSLDSDLPRLRKRKTDENNKNRKGGKKLRDRSNTRQLLLSINDDVSLEAHQNILTTYYTNILLPKFRALNALPSAVHKCGQQCVQSAEENFCPSRIRYNPFLLPFECQWSVVDSKPRGYRT…
>A_steineri_CAF1051589.1
MITNLDNLKKIDDGNMSSSVFDSPCSSVTSDKHDVVIIVNDDSDIEIEEELNITTLNGNFMIKNLIGKLAINTELIVIKPNLPIRKCRTAVDYPKLQDIHIITVHNPQMLTPEYITKRQLYLIETYSSLDLPIRTRIFHHATSLLGFILETPCARKNNNRYLVLYDNFTAYYHTHSELHLCLCQDYRRHLSNIDYKELQLHYQNAFENINKSTSSIYKLNSIIRVRKFGSQYHNARIIDIDCSLIKICFFERKSNPEIWIHAKSSIIDQSQPVLQQEQEQEQPSIFSILSIPETPPEEIVPTYSDLSRLRKRKNDDFDINNGNKKLHDRSNTRLAASSSLIQQEQTSLSSNEKNSSKSRNKMVTTYYTNILLPKFRVLNALPSTMHTCCQQCVLSSEEK…
>Rmag01878
MTYRHHLFSIRLAQDKPDIVIVLDDDNAENDIKLDKHSITDIIEKYDNSIANSLIEKLEINTELIVVKPNLPIRICATAKAYSNLQDTHIIMVLNPRLSTPECITKRQAYIHEPCSSFNVPIRTRVFHRSLSLLGFVFEMPCPIKNQNRYLVLYDNLTANYHSHSEFHLCLCQDFRRHLLNIDYKELRAHYQDAFQNSNQIKQSNYTIGDIIRVRKFGNQYHNVRIVDIDCSIIKICFFERKSKKEIWIHTNSSIIEQSQQISQSTTPSIPSSPQTPTEELNNSYSDLSRLRKRKSQSSNANEGTKKLRDRSNTKQLSIQHQQSSSTSNEQVSIATSRTNILTTYYTNILLPKFRMLNALPSISHKCSRQCVLLAEENFSPRKIQTNPFLLPFECDWSI…
>Rmac01043
MTLDHHLFLIHLVQDKQDIIILDDDYDDETENENSINEQSNTDLDEKDQNLIFKTLIGKIEINVELIIVKPNLPVRICTTTEAYSNLDDIHILKVHNPRVSTSECVTKRQVFKNELCSSLHVPVRTRIFNSSAALLGFVFEMPCPIKNKNRYLILYDNFTAFYHSHSEFHLCLCQDFGRHISNIDYKELRLHYLHAFENLNQSKQSNYTIGTIIRVRKFSAQYHNARIIDIDCSIIKICFFERKSKKEIWIHSNSSIIEQPKQISQSKTLNIPSPSETPTNETDNSYSDLTRLRKRKNNSSHVNEGNKKLRDRSNTKQILIKSQQHSLSSKEKTPVPSRNNIVTAYYTNILLPKFRLLNALPSTSHKCSHQCVLLAEEKFSPKKIQTNPFLLPFECNWS…
>Rotaria_socialis_CAF4524368.1
MVTSLKNITDDLSSSSVFDTPCSSVSSDKQDVVIVLDDDENDIKIDKHSITDIIEKYDNLIVNSLIEKLEINTELIIVKPNLPIRICATAKAYSNLQDTHIIMVLNPRLSTSECVTKRQAYIHEPCPSFDVPIRTRVFHRSLSLLGFVFEMPCPIKNQNRYLVLYDNFTANYHSHLEFHLCLCQDFRRHLLNIDYKELRAHYQDAFQNSNKIKQSNYMIGNIIRVRKFGNQYHNVRIIDIDCSIIKICFFERKSKKEIWIHANSSIIEPSQQISQSATLSIPSSPQTPTEELNNSYSDLSRLRKRKDQNSNANKGAKKLRDRSNTKQLSMTSNEQLSITTRTNILTPYYTNILLPKFRMLNALPSISHKCSRQCVLSAEEHFSPRKIQTNPFLLPFECN…
>Rotaria_sp_Silwood1_CAF1475125.1
DDNKSSSIFDSPCSSVSSDKQDVVIILDDGENDTTIDEQSSIDTDEKNDSLIFKNLIGKLELNSELIVIKPNLPIRICTTAVAYSNLQDTHIIMVHNPRMSTSECITKRQAYMKESCSSFLVPIRTRIFHRSLSLLGFIYEIPCPIKNNNRYLVLFDNFTASYHSHSEFHLCLCQDFRRHISNIDYKDLQLYYQHAFQNLNLSIRSNYTIDDIIRVRKFGAQYHNVRIIDIDCSLIKICFFERKSKKEIWIHSNSSIIEQSQQISQITTLMIPPSPQTPTEDISCSYSDLTRLRKRKDHNDNTNEGSKKFRDKSNTKQLSIQSKEQISTISRNNIVTTYYTNILLPKFRILNALPSITHKCSRQCVLIAEENFSPKKIQTNPFLLPFECNWSIVDSKPR…
>Rotaria_sp_Silwood2_CAF2817500.1
VNDDNKSSSVFDTPCSSVSSDKQDVVIILDDDENDITIDEQSSTDKDENDDNLILKDLIGKLELNSELIVVKPNLPIRICTTAVAYSNLQDTHIIMVHNPRMSTSECVTKRQTYINELCSSLNVPIRTRVFHRSLSILGFIYEMPCPIKNNNRYLVLYDNFTASYHSHSEFHLCLCQDFRRHILNIDYKDLQLHYQHAFQNTNLSIQSNYTIGNVIRVRKFGAQYHNARIIDIDCSIIKICFFERKSKKEIWIHSNSSIIEQSQPTSQLTTLTIRSSPETPTEEISNSYSDLSRLRKRKNHGSNANEGSKKLRDESNTKQPISSSNEHTSTVSRTNIVTTYYTNILLPKFRVLNALPSTSHKCSRQCVLIGEQNFSPKKIQTNPFLLPFECNWSIVDSK…
>Rotaria_sordida_CAF3953972.1
VNDDNKSSSIFDTPCSSVSSDKPDVVIILDDDDDDDENDITIDEQSSTDTDEKDENLILKDLIGKLETNTKLIVVKPNLPIRICTTAVTYSNLQDTHIVMVHNPRMSTSECITKRQAYMNEPCSSLNVPIQTRVLHRSLSMLGFIYEMPCSIKNKNRYLVLYDNFTASYHSHSEFHLCLCQDFRRHILNIDYKDLRSHYQHAFQNSNLSRQSNYTIGNIIRVRKFGAQYHNVRIIDIDYSIIKICFFERKSKKEIWIHSNSSIIEQSQQILQLTRLTIPPSPQTPTEEISNSYSDLSRLRKRKSHSSNTNKGGKKLRDESNTKQTSIQHQSSISSSSISNEKTSTISRNNIVTTYYTNILLPKFRILNTLPSTSHKCSRQCVLIAEENFSPKKIQTNPF…
>Av_s19b
MFNIRRSTSSFVLSEKQSDTLIVIDDDNDTDSDIEIDGAITDFNQHDKEDLGLLKRFIPKLDIETELIHITPNQSLRICTAALFYSNLPETHIIVINHTLNSSPECAPKRHLYINNTNPILSIPSRARIYSRCSSLLGFIYEKPCSMKNANRYLVLYDNFTASYQLSTTFHLCLCQDFDKHLLNIDYSDLQTYYRNAFRYRHLSKQLNFSIGMIIRVKKFDGQYHNARIIEKDYSLIKICFYERKSQTQIWIHCNASIIDDSQELSLSKKLRISSSLSSSQSQHSITDLIISNTDLSRLRKRKTNVNHIDEGKKKLRDRLNTKQLSIPQRQSSSSSDETHSASRANMLTAYYTDILLPKFRLLNNIPYVPHKCDSQCVLVAEESFHPNQLHINPFLLPF…
>AvL1_19b
MFNLRHSSSSFVLPVSEKRSNTSDTFIIIDDDDDDNVSDIEIDEIISNSNQNEKEHQILLKTFIPKLDIETELIHVSSNLSLRICTAALFYSNLPETHIIVVNYTLNSSPECVLKRYLYINNMNPLISIPIRARIYYRCSSLLGFIYEKPCPIKNGNRYLILYDNYSASYQTAMTFQLCLCQDFDKHLLNFDYNGLQTYYRNAFRYNHRLKQSNFNIGMIIRVRKFDGQYHNARIIDKDYSLLKICFYERKSQTEMWIYCQSSIIEVSQELSLSKKLRISSPLSSSQSEHSITDLIISNSDLSRLRKRKTNVTHIDEGKKKLRDRSNTKQLSIPQHQSSSSSSSSSDETHSASRANMLTVYYTDILLPKFRILNHIPYVQHKCDSQCVLLAETIFQSNR…
>Ar_215b
MLFFYTLTSSVNDSKQAVIVSILANFNNEKRSASMFNLRHPNSSFLSTEKQTNVSDAIIILDDDDSDSDIEIDQSTSDSTDQENQDQTLLKTFIPKLDMETELIHVTSNLTLRICTAALFYSNLPETHIIVVNHILNSSPECVPKRHLFIGNTNPLLSIPIRARVFYRCSSLLGFVYEKPCPIKNGNRYLILYDNYSASYQNATTFHLCLCQDFNKHLLNFDYNALQTYYRGVFRHCHQTTQSHFSIGMIIRVRKFDGRYHNARIIEKDYSLVKICFYERKSQSEMWIYCHSSIIEASQDLSLSEKLRISSPLSSSQSQHSITDLIISNSDISRLRKRKTNVTHIDEGKKKLRDRSNTKQLAIPERQLSSSSDETHTTSRANMLTAYYTDILLPKFRLL…
>A_steineri_CAF0959126.1
MVENVIANLKSSSIFDHHHSNISSNVLRDKQSNASDNLIVLDDDDDDDDTELHENEEHTTLKTLIPKLDIDTELIHVQPNLPMRICTAGLFYSNLPQTHVIIVNHSLVVSPKCIIKRQLYLSKPNPLLSLPIRTRIYNRYLSLSGFILEKPCAIKNSNRYLIIYDNFTAYYHSQTEFHLCLCQDFEKHLTNIDYLELRTYYRDAFRYSNQSKQSNLTVGTIIRVRKFGTQYHNARIVDKDCSIIKICFFERKSQTEMWIHLNSSIIEPTLTKELNISSSSTCQNSIKDLIISSNSDLLCLRKRKTNANDINEGTKKLRDRSNTQRLTMPQRLYSSSSDDTQPPVASSRANMLTVYYTSILLPKFRILNNIPYIVHNCSQQCILSVEKNFLPNKIHINPY…
>Rmag00775b
MGKQQVSQDIEVIVLDDDSDVESIGISNRTTHEANNSDVLKTLMSTLDINTELIYVKPNSSTQICTAALAYSKLVETSIILVNHYPIASTECIIKRYLYLSKPCQSLSIPTRIRIYNRSLSLLGFIIEKPCSIKNLNRYLIIYDNYTANYHSPMDFHLCLCQNFEKHMLNFDYCELRSYYQHAFQNFNTSKRSNSSIGTIVRVRKFGSQYHNARIIDKDCSLIKICFFERKSQTEMWIHSNSSLIDSTQDLLLSTKLAISSFESHNLTQEIIITDLDLSRLRKRKANGNNINEGRKKLRDRSNTKQTQVSQRQSSSSSDEIPSASRANMLTAYYTDILLPKFRMLNNLPLIPHKCNRQCVLLAEEKFHINKIHTNPFLLPFECRWSLIDGKPRGYRTPC…
>Rmac00081b
MFNNRCSTVSSISVDKQEANQSIEVVIDDETDDEIEIQEISNRNIFEHEDNRLLKNLIVKLDMNTELIHVRCNSSIELCTTALSYSNLSDIHIVLVNALSLTKMECVIKRQLYISKSDLSLSIPTRARIYNRSLSLFGFILERPCSIKNLNRYLIVYDDYTAYYNLQTDFHLCLCQDFQKHVSNVDHGELRSYYQHIFQNSSISQQTNFPIDTIIRVKKFGTQYHNARIIDKDCSLIKICFFERKSQTQMWIHSNSPTIDSSQELLLSQEFKSSSLLSLSSLKSHVSTNDMMIDDLDLSSTRKRKPNVNNINEGTKKLRDRSNIKQVELQQRRSSSSDNEIQIASRANSFTTYYTDTLLPKFRVLNSLPYTAHKCSHECVLLAEENFHTNTIITNPFLL…
>Rotaria_socialis_CAF4236627.1
MYVIPIIVNTSSTSIFNSIGPIIPPGKQPVSQDIEVIVLDDDSDVEPIGISNITTHETNNSDVLKTLISTLDTNTELIHVKPNSSTQICTAALNYSKLVETSIILVNHYPIASTECIIKRYLYLSKPCQSLSIPTRIRIYNRSLSLLGFIIEEPSSIENLNRYLIIYDNYTANYHSPMDFHLCLCQNFEKHMLNFDNCELRSYYQRAFQNFNTSKRSSTSIGTIIRVRKFGSQYHNARIIDKDCSLIKICFFERKSQTEMWIHSNSSLIDSTQNLLKLAISSFESHNLTQEIIITDLDLDLSRLRKRKTSGNNINEGRKKLRDRSNTKQTQISQRDEIPSASRANMLTAYYTNILLPKFRMLNNLPSIPHKCNRQCVFLAEEKFHINKIHTNPFLLPFE…
>Rotaria_sp_Silwood1_CAF0750720.1
MTRNPRPYSTILDKQQTNQNVVVILDDDDNDSEINEISNINIHENEDSQILKNLISKLDIGTELIHVKPNLSMQICTAALAYSNLSQTHFIIVNYTSILSMDCVIKRQLYTSTSNSSLSIPIRTRVYNRSLSLLGFILEKPCSIKNLNRYLIIYDNYTAQYHLQTDFHLCLCQDFHKHLSNIDYTDLRSYYKHAFKNSNRIQQSNFSIGTIIRVRKFGSQYHNSRIIDKDCSLIKICFYERKSQTQIWIHSKSSMIDSSQELSLSTKLKISLSSTNDMMIADLDLSRLRKRKTHVNNINEGKKKLRDRSNTKQIQISQRDEVPLVSRANMLTAYYTDVLLPKFRILNSLPYIGHKCSQRCVSLVEENFHADKIHTNPFLLPFEYQWSIVDGKPRGYRTP…
>Rotaria_sp_Silwood2_CAF3942393.1
LIKTVKDFNNDKKCSSTFNSTASSIPSDKQKTILDDDDDNNDIEISEISNINTHENEDNKILKNLISKLDIDTELIRVKSNSSIQICTAALAYSKLSETHIIIVNHSPLSSMECIIKRQLYISISNSSLSIPTQTRVYHRSLSLLGFILEKPCSIKNLDRYLILYDNYTANYHLQTDFHLCLCQDFQKHLSNIDYNELHSYYKHAFKYSNGFQQSNYSLGTIIRVRKFGTQYHNARIIDKDCSLIKICFYERKSQTQIWIHSNSSMIDSSQELSSSSSLSSSFKSPDSTNDMIITDFDLSSLRKRKTNVNNINEGKKKLRDRSNTKQVQISQRDEVPSASRANMLTAYYTDILLPKFRILNSLPFIGHKCSRQCVSLVEENFHVNKIHTNPFLLPFEYQ…
>Rotaria_sordida_CAF1154657.1
MSLANFNNDKKSSSIFNNPVSSVPSDKQETILDDDDDDNDIEITEISNGNLNENEDNQILKNLISKLDIGTEIIHVKPNLSTQICTASLAYSNLSGTHIIIVSHSSASSMECIVKRQLYISKPNLSLPIPIRTRVYHRSLSLLGFIFEKPCSIKNLNRYLIIYDNFTAKYHSQTDFHLCLCQDFEKHLSNIDYIELRSYYKYAFRNLNKFHQSNFSIGTIIRVRRFDTQYHNARIIDKDCSLIKICFYERKSQTQIWIHSNSSMIDSSQELSLTTSSVRSLDSTNDMMITDLDLSRLRKRKTNVNNINEGRKKLRDRSNTKQIQISQGDEIPLASRANMLTAYYTDILLPKFRILNTLPYIGHKCSRQCVLLVEENFHINTIHTNPFLLPFEYQWSIID…
>Av_s19a
MPSTRTTYESNKKNKENFTNLSKDAIIIDDDNESSHSDCLIIESNTSTSTLSDTNTSLSLLGILPNTLEKQTNLLLIYENRIMDVHLIASVFNLEQQQNITISHLNYFYSIPKRHLYLSIHCNIEHVSMPHQCRVMYTSFMKTKFSLGFIDESPSIYNHSRHLILLDDGTAVYTTNNDRIHLCLCQDFERNSRSIESKSIRKDLEEILFHQKLNKKRYQLHDYVRVKKFDENYHHAQIIEIDCSIMKLKFYERQAQTEIWMHQQSILIDDIIMSPVELASPMILQPKQTSNEIVSCKRENFVKTEIILASLSSTSLIQSFCSNVYQPHQCSPYCVLTIEENFNPNQILQNPYTLPFSYGWRYLYIDRYAKGYYSKKPSTHKTVSRVNYLYRSPCGRSLL…
>AvL1_19a
MFPTIVSIQSVQQNKENFTNISKNPITIDDDDDNESSYSDCLIIEPDVSIPTIPDSNSHLLTLGILPNTLSKQTNLLLVYENQIMDVHLVTSILDLEQQQHVTISHLNHFYSIPKRHLYLATSCNIEHSSIPLQYRIMCTSTSKTKFSLGFICETSSMYNHLRHLILFDDGTATYTTKNDQIHLCLSQDFERNSRSIEPKSVRKDLEEILFRKNLDKKQYQMYHYVRVQKFGENYHNAQIIDIDCSIMKLKFYERQAQTEIWMHQQSMLIDDINMSPVEIASPMILQNKRRQDEIRLCSASSSIQSFRTNSYQPHQCSSYCISAAEENFNPNHITQNPHTLPFSCGWRYLQIDRYAKGHFTKKPSTHKTLSRVNYLYRSPCGRSLLNLDEVEDYLFETN…
>Ar_s97a
MDLLLIFPLCRYVLLNNQQNIPILVFHSKKSKEYFTDMSEKPIVIDDDDDDGDSESSHSDCLIIEPASSSFDTRIDLSSLGILPNSLAKQTNLILLYENRIMDVHLAASISNLEQQQHLTISHLNYFYSIPKRHLYLSTPSAIEHVSIPRQYRIMCATKSEKKFSLGFIGESPSMVNNLRHLILFDDGTATYTTADDRIHLCLCQDFQRNSRSIELKFVQKDLEEILFHDNVNKKPYGLYHYVRVKKFDGNYHNAQITKIDCSIMKLKFYERQAQTEIWMHRRSILIDDVVMSPVEIASPMILQNKQEYDERDSVSPSTNHSFHSNTYHSHQCSPCCVLTVEEKFNPNLITQNPYTLPLLYGWKYLYIDRYAKGCFTKKRSTHKTLSRVNYLYRSPCGR…
>A_steineri_CAF3631310.1
MFPILTTFQHNEENKENYDFSSKKSVDEDIEIIHDDCLIIEPDIPIPIFHDTNSHISLVGILPNDLSKQTKLFLIYENRIMNVHVVTSVNNLERHHHITISHVNHFYSIPKRHLYLSNICDIQHISIPQQYRIMYISPLKKQFSLGFICENPSVYNNLRHLILFDDGSVAYTTMNDHIHVCLCQDFERNFRSIESKLVRKDFQELFFDKNLNKKQYQLHNYVRVKKFDDKYHNAQIIDIDCSIIKLKFYERQAQTEIWMHRQSSLIDDIFLSPIEIASPIILQNKRKHDEISTFSPLPSIHTFHSNSYQLHQCSSYCVLGKEENFNPNCFTENPYTLPFSCGWKYFHINRYAKGRFTKKPSTHKTTTSRSNYLYRSPCGRSFLTLDEVETYLFETNSKL…
>Rmag00775a
MLSTITEFEYERQNKENNQYIPLQVIVDDEENSSDDCFIIESSDPITPSLSCNDSNFQLLSTNVLPYTLPKRANLLLIYENRTLDVQIVDPVVNLEKRERLTISHSSYIYSIPKRHLYLPMCFNIEHIVIPKQTRIMYKSSSTSKTFSLGFICETPSLYNYQRYLILFDDGTATYTTNNNTIHLCLCQDFERNLRSIESGTLEQNLDKLIYNKNSNKRKFQLQDEVRVKKFDDKYHNARMVDADCSIVKLKFYERQAQTEIWMHSDSLLIDDAAIASVDIASPVILQNKQKSEEIFPSKTENSHLIFILVSLPPLRASIRTSLSNLYQSHRCSRYCVLTAEENFTPHYITKNPYTLPLSCGWTYFHIDRHGEGQFKKKPSTRKKLPSHSTYLYRSPCGR…
>Rmac00081a
MIKYNTYNKENLNFVPRNQTYDDDDDDDYDAESSHSDCLIIESKMPKSPCKNVRLMKLSNFHLSFMNTLPNHFPKHTNLFLIYENQTMDVQLISAINDLGNQERITISHLNNFYSIPKRHLYLSNPCNIQTMSIAQQSRIMLMSSPEKISLGYICETPSVYNNYRHLILFDDGIACYTLSHDQIYLCLSQDFERNSRSIESKLHRQNFQKLLFENNLNEQKFKIHNHVRVKKFDDKYHNARIIDIDCSIVKLKFFERKAQTEMWMHQHSLLIDDSIITPIDIASPTILRNKRKYDETSTSKLRNIINSKSSNFYEIHRCSSHCVLTSEQNFFPNCILENPYTLPFTCGWNYLHIDRCGKGPFKKKPSTHKIGCSKSNYLYRSPCGRSLLSLNEIEEYLL…
>Rotaria_socialis_CAF3308047.1
MLPTIMKFEYERQNKENYQYIPLQVIVDDEENSSDDCFIIESSDPTTPSLSRNDPNFHLLLTNALPHTLSRRTNLLLIYENRTLDVQIVDPVVNLEKQERLTISHLNYLYSIPKRHLYLSICLNIEHVAIPEQTRIMYKPSSTSKTFSLGFICEIPSLHNYQRYLILFDDGTATYTTNNNTIYVCLCQDFERNLRSIESTMLRQNLEKLIYNKNSNKRKFQLQDEVRVKKFDDKYHNARMIDTDCSIVKLKFYERQAQTEIWMHLDSLLIDDAEIASVDIASPVILQNKRKCEEILPISQPPPPPLRVSTRTSLSNLYQSHQCSRYCVLTAEENFAPHNITENPYTLPLSCGWTYFHIDRHGEGQFTKKPSTRKKLPFSSTYLYRSPCGRSFLTLDEIE…
>Rotaria_sordida_CAF3512415.1
MLPTMTIMEYNGQNKENLKFVSKKQSDDDDDDDDDDAESSHSDCLIIESNISTSQYNDSNFHLTLTNTLPNSLPKQTNLFLIYENRTMDVHLVTPIVDLEKQERITISHLNYLYSIPKRHLYLSIPCNIQRTHIPRQSRIMYISTTSSSSSSTTKKFSLGFICEVSSIHNHLRHLILFDDGTAKYTMENDLIYLCLCQDFERNSRSIESKLMRQNFEKLLSNKCLNKQKFHIHNYVRVKKFDDKYHNARIIDVDCSIIKLKFYERQAQTEIWMHQHSLLIDDTIIPPIDIASPVILQNKRKYDEISTISRSSSPVSIRSFPSNVYQSHQCSPHCVLTAEENFIPNCIIQNPYTLPFSCGWKYFHIDRYAKDRFKKKPSTRKTISSRSNYLYRSPCGRSF…
>Rotaria_sp_Silwood1_CAF0750703.1
MLPTITTIEYNGQNKENLKFVSKKPIDDDDDAESSHSDCLIIESKISTPQYNDSNFHFTSTNILPRSLSKQTNLLLIYENRTMNVHLVAPVVDIEKQERITISHLNYLYSIPKRHLYLSVPCNIQCTSIPRQSRIMYISSSAAATQKISLGFICEVPSLHNRLRHLILFDDGTAKYTGDDDLIYLCLCQDFERNSRLVESKLIRQNFEKLLSNKYLHKQKFHIHNYVRVKKFDDKYHNARIIDVDCSLIKLKFYERQAQTEIWMHQYSLLINDTIIAPIDIASPIILQNKRKYDEISTTSRSSSPVSIRPLPSKFYQPHQCSSHCVLIAEENFMPYCIIQNPYTLPFLCGWKYFHVDRYAKGGFKKKPYTRKTTSSRANYLYRSPCGRSFLTLDEVEQY…
>Rotaria_sp_Silwood2_CAF2506037.1
MLPTISIIEYNGQNKENLKFVSKKQIDDDDDTESSHSDCLIIETKMSTSPCKDFNFHLQLTNTLPNSLPKQTNLLLVYENRTMDVHLAAPIIDLEKQERITISHLNYLYSIPKRHLYLSIPCNMQCTTIPRQSRIMYISSLTTTKKISLGFICEVPSLNNHLRHLILFDDGTAKYTVENDLIYLCLCQDFERNSRSIESKLIRENFEKLLLNKYLNKQKFHIHNYVRVKKFDDKYHNARTIDVDCSIIKLKFYERQAQTEIWMHQHSLLIDDTIIAPIEIASPVILQNKRKYDEISTISRSSSPISIRPLPSNFYQPHQCSPHCVLIAEKSFIPNCIIQNPYTLPFSCGWKYFHVDRHAKGGFKKKPSTRKTISSRSNYLYRSPCGRSLLTLDEIEQYL…
>Dcar_s08656
METVIVRQTTGLLKHLKQNDTLWLRFDVNKTGIYSLSESKSLLQVKLGEDVDDVQTRDKVAIIHNEKLYHIETKYLFFVDPCDDETVIPVKTRVLIRTLDNRQKIVLSFGFIGESPANYNHYRHLIIFDNLSATYHENMGEIHLSLARDFSCHLPHLNLSSRIFFRQYFDYILSSTKVIPTINFPINTIIRVKHAGNYHNARIIEKDCSMIKVKFFERKSQLEIWIYSGAIVIEQIDQQFYSNHKHEVSKESSIKTTTSAVANHCSLIPVVSLLNHQQLNSSSMTGVLPPCQNVTTITFSTSSSPLATLCHLSDLTDRKRKLYESIEKRKYSHPVLVRINNSYFFPVFKQPLFKIDNQRKSSTRKKFILDQKSNDTLITTRSTIITASLPLFSRHICSN…
>Dcar_s01069
MSKCLKQSDTLWLRFDVNQSGIYSLSPTKSLLQVKLGENVDDVQTRNTIAIVHNEKLYHVETKYFFLSKPCDDDTIIPLKTRVLVRTIDEQQKIDLSFGFICEIPTQYNHYRHLIIFDNLSAKYHQNMHEIYLSLSGDFSCHSPHLNFCSRIFFEQYFNYLSSFPKISPTINLPINTNIRVKHAGNYHNARIIERDCSMIRVKFIERKSQSEIWIYSGSISIEQIQQRFYSNYQQDVFKQSSSQTTTLVTKKLAVANHCISSPVTSSLIRQQIGLSSTTSILSYSKNRPSTIHSINSNLSTALCPKSSLSNRKRKLNETIEKRCKYFIGTFLVLAKLQSAVFFNSCVRTTTTSSSLSLFTRHVCSNLCVANAEKHFDPSNLHSFTLPIQCGWKFLKIII…
>Av_s90
MDVDSVLKPLDDEQKYLQQLRQSSTVEPILLHLFNLLEIEDYRVLFYSINLRTVDCQWLQTFGKLCLKRYFELDDMSFFKTSQFTSFNKNDTKSILENYTNFLIENLKQRFTINYFRAIMFEIEELNRFKFDQVSKQLNENNHIINELFLLFNHEIDEKDDSIIHLSSTPAPPIHRPIYINYKPIHMVYLRENLLIKNDLDTRLPLKGITNAFVADLINTKHINILDEVTGKTHDIPTKWLYFSKPCENNVILPLKLRVLIIDSQTGRRRYGLIGEEPGKNNDYRCLVFFTDDSTNMSANYHPSSHIHICLDQTFSIHTQECKNEFLDRYFASYPERMMLRAKEGSIVKVRNIFTNFHNNSFVPALVIQIDGSMMQIELSHSKQRKWLYRGSPLLDQMH…
>AvL1_90
MDVDRVLKPLDDEQKYLQKLRESPTVEPILLHLFDLLEIEDYRILFYSINLQTVDCQWLQTFSKVCLKRYFELDDILFSDTSQINSLNKNDMKSIMENYTNFLIENLKQRFTINYFRAIMFEIEQLNRFKFDQISKQLNENNRIINELFLLFNHDNDDKDDSIIHLSSTPAPPIHRPMYINYKPIHMVYLRESLLIKNDLDSRLPLKGITNTFVADLINTKHINILDEITGKNHDIPTKWLYYAKACENNVILPLKLRVLIIDSQNGRRRYGLIGEEPGKNNDYRCLVFFTDDTTNMSANYHPSSHIHICLDQTFSTHTQECNNDFLDRYFASYPERMMLRAKEGSTVKVRNVFTNFHNNSFVPALVIQIDGSMMQIELSHNKQRKWLYRGSPLLDQMH…
>Ar_s56
MDVDSVLKPLDDEQKYLQKLRQSSTVEPILLHLFNLLEIEDYRELFYSTNLHTIDCQWLESFSKLCLKRYFELDGVSFSQTSHFNSSNRTDTKSIMENYTNFLIETLKQRFTINYFRAITWEIEQLNRFKFDHIFKQLNENNRLINELYLLFNYDNDEKDDCIIHLSSTPAPPITRPTYINYKPIHMVYLRESLLIKNDLDARLPLKGITNTFVADLINAKHINILDEVTGKTYDIPTKWLYIAKPCENNVILPLKLRVLIIDSQTGRRRYGFIGEEPGKNNDYRCLVFFTDDATSMSATYHSSSHIHVCLDQTFSTHTQECRNDFLDRYFASYPERMMLRAKEGSTVKVRNVFANVHSTSFVPALVIQIDGSMMQIELIHSKQRKWLYRGSPLLDQMH…
>A_steineri_CAF0997141.1
MDVDSVLKPFNDEQKYLQKLRRSTTIEPILLHLFNLLEIEDYRLLFSSINLQTVDLKWLQNFSKLCLKRYFELDDIFFSQTFQINSQNKHDTKSSIENYTNFLIENIKKRFAMKYFCAIVFEIEQLNRFKFDEISKQLNENNRIINELFLLCNTHDNNDDKDDSIIHLSSTPAQLINRPIYINYKPIHMVYLRENLCIKNDLDQRLPLKGITNTFVADLINTKQINILDEITGKTYDIPTKWLYFSKPCETNVILPLKLRVLIIDSQTGRRRYGLIGEEPGKNNDYRCLVLFTDDQTNISANYHPSSHIHICLDQTFSTHLHESKNDFLEKYFALYPERMMLRVKEGSIVKVRNVSANLQNNNSFVPALVVQIDGSMMQIELSHSKQRKWLYRGSPLLD…
>Rmag01625
LDVDNTLKPFDDERKYLQKLRQSTTVESILVHLFDLLQIEDYRVLFSSINFQTIDLAWLETFSKLCMKRYLEFDDICFYTKTSEINLKNKYYTKSIIENYTNFLIENLKRRFTMKYFCAIISELEHLSYFKSETLSKQLHENNRIIQEIFLLFNSDNEDKDDSIIHISSTPAQPINRPVYINYKPIHMVYLRENLLIKNDLDARLPFKGITNAFIADLIHTKIINILDETTSKVHDIPTKWLYFAKPCESNIILPLKLRVLLLDSQKGTRRYGLIGEEPGKNNDYRCLVFFTDDKQNMSASYHPSSHIHICLDQTFSMHQHECQNEFLDRYFASYPERMMLRAKEGSLVKVRNVFTNFNPNSFVPALVIQIDGSMMQIELSHSKQRKWLYRGSPLLDQM…
>Rmac00226
MDIDSLLKPFDDEREYLRKLRQSTTSESILLHLFDLLDIEDYRLLFSTINFQTIDLKWLETFSQICMKRYLEFDDICFSSESSKLNFENKTDSKSIIENYTNFLIENLKARFTLKYFCAILLEIEKLNHFKYEQILKQLNETNHTIDELFLLFNSDNDDKDDSIIHISSTPAQPINRPIYINYKPMHMVYLRESLLIKNDLDLRLPIKGITNTFVADLIHTKIINVLDETNGKTYDIPTKWLYFSKPCEANVLLPLKLRVLIIDALTNVRRYGFIGEEPGKNNDFRCLVFFTDDKTNMSANYHPSSHIHVCLDQTFSTHTHECQNDYLDRYFSSYPERMMLRAKEGTLVKVRNVFTNFNPNLFIHALVLQIDGSMMQIELSHSKQLIWLYRGSPLLDQM…
>Rotaria_socialis_CAF3033654.1
LDVDNTLKPFDDERKYLQKLRQSTTVESILVHLFDLLQIEDYRVLFSSINFQTIDLAWLETFSKLCMKRYLEFDDICFYSKTSEINLKNKNDTKSIIENYTNFLIENLKRRFTMKYFCAIISELEHLSHFKSEKLSKQLNENNRIVHEIFLLFNSENEDKDDSIIHIGSTPAQPINRPVYINYKPIHMVYLRENLLIKNDLDARLPFKGITNTFIADLIHTKIINVLDETTSKVHDIPTKWLYFAKPCESNIILPLKLRVLLLDSQKGTRRYGLIGEEPGKNNDYRCLVFFTDDTKNMSASYHPSSHIHICLDQTFSMHQHECQNEFLDRYFASYPERMMLRAKEGSLVKVRNVFTNFNPNSFVPALVIQIDGSMMQIELSHSKQRKWLYRGSPLLDQM…
>Rotaria_sordida_CAF1210061.1
MDVDNLLKPFDDERKYLEQLRQSTTVESILLHLFDLLQIEDYHLLFSTINFQTIDLQWLESFSRICMKRYLEFDDICFTSKTLEINFENKNDTKSIIENYTNFLIENLKQRFTLKYFCAIIIELEELNHFKFEQISKQLNENNHIIHDIFLSFNNDNDDKDDSIIHISSTPAQTINRPVYINYKPMHMVYLRENLLIKNDLDLRLPLKGITNTFIADLIHTKIINILDETTGKTYDIPTKWLYFSKPCESNVILPLKLRVLIIDSQTGIRRYGFISEEPGKNNDYRCLIFFTDDKTNMSANYHPSSHIYICLDQTFSIHTHECQNDYLDRYFSSYPERMMLRAKEGSFVKVRNIFTNYNHNLFIHALVIQIDGSMMQIELTHSKQRIWLYRGSPLLDQM…
>Rotaria_sp_Silwood1_CAF1351781.1
MDIDSVLKPFDDERKYLEKLRQSTTVESILLHLFDLLQIEDYHLLFSTINFQTIDIKWLETFSRICMQRYLEFDDICFSSKTLQINLENKNDTKSIIENYTNFLIENLKRRFTLKYFCAIIIELEQLSYFKFEQISKQLNENNHIIHDIFLLFNTDNDDKDDSIIHISSTPAQTINRPKYINYKPLHMVYLHENLLIKNDLDLRLPLKGITNTFIADLIHTKTINILDEITGKTYDIPTKWLYFAKPCESNVILPLKLRVLIFDSQTGCRRYGLIGEEPGKNNDYRCLIFFTDDKTNMSANYHPSSHIHICLDQTFLTHTHECQNDFLERYFASYPERMMLRAKEGSLVKVRNIFTNFNHNLFIHALVIQIDGSMMQIELSHSKQRIWLYRGSPLLDQM…
>Rotaria_sp_Silwood2_CAF2611965.1
MDVDSVLKPFDDEQKYLQKLRQSTTVESILLHLFDLLQIEDYHLLFSTINFQTIDLKWLENFSRICMQRYLEFDDICFSSKTSQINLENKNDTKSIIENYTNFLIENLKRRFTLKYFCAIIIELEQLNHFKFEQISKQLNENNHIIHDIFLLFNTDNDDKDDSIIHISSTPAQIINRPIYTNYKPMHMVYLRENLLIKNDLDLRLPLKGITNTFIADLIHTKIINILDETTSKTYDIPTKWLYFSKPCESNIILPLKLRVLIIDSQTNCRRYGFIGEEPGKNNDYRCLIFFTDDKTNMSANYHPSSHIHICLDQTFSIHTHECQNDFLDRYFASYPERMMLRAKEGSLVKVRNIFTNFNHNLFIHALVVQIDGSMMQIELSHSKQRIWLYRGSPLLDQM…
>Rmag00125
MDIESVLKPFDDEQQYLRKLRNSSAIEPILRRLLDLLNDGDYRLLFSSINRQKLDYKWLETFSKLCMKRYLEVDDIFFTDHNLTNKIKSESSSKSIFDSFINYLKENFQNGFSVHYFHAIIYELEQLNQFKVDEISKQLKKNNEVIQKLFLLFDNSPNIVDDSIIHISSTPAQPIYINYKPIHMVYVRTEVIIKNNHNLQLPAKGIVNKFVADLIHTNTINILEEKTNKTYDILTKYLYFAQSCEKNIILPLKLRVLIIDGQTKKHHFGLIGEEPGKNNQYRCLIFFTDDMTHISAGYYSSSDIHICLDQKFEYENDFLNSYFKSYPERMMLRAKEGTIVKIRNPLLITKNVFLQAIVILIDCSMMLIELSNTRQRFWIYRGSTLIEQMNNYYTTQNSN…
>Rmac00047
MDIESVLRPFDDERQYLQQLRKSFAIQPILLHLFDLLNADDYRLLFSLINRKKFDCKCLETFSQLCMQRYLEIDDVFFSENTLHSKFKIESNKKSIFDTYMNYLKENFKKHFSIHYFHAIIYELEQLNRYKIEQISGQLKKNNEIIQKIFLLFNKNVPYYDDSIIHLSSTPAQPIYLNYKPIHMIYLHTNVLIKNDHNLQLPLQGITNVFVSDLINVKMINILDERTNKVYDIPTKWLFFSKSCDRNVILPLKLRVLIIDSFTGKRHYGLIGEEPAKSNNYRCLVFFTDDKTNISAHYYSSSDIHVCLDQTYEYDNKLLNCYFKSYPERMMLRAKEGTMVKIRNIFSTNKTLFLQAIVMEIDCSMMLIELSQTKQRMWIYRGSTLIEQMNNYYSTQNRI…
>Ar_s11
MDIESVLRPFDEEREYLRKLRQSSTVEPILLRLFDLLKPDDYRLLFSTINRQKLDYKWLETFSKLCMQRYLDLDDIFFSEETLSNPIRSESHSNSILENYTNYLIENFKNFFTIQHFHAIIYELEQLNHFKTEQISKQLNENNHIIQKLFLLFNNNPQFYDDSIIHLSSTPAQPIYVNYKATHMIFLRTSILVQNEHDSHLPSKGITKAFVADLTNTKKIEIFDESTNKTCEIPTKWLYFGKACEKNIILPLKLRVMIIDCRTNRRRYGLIGEEPGKQNHYRCLIFFTDESANVSAGYYLSSEVHICLDQMFECDNEFLNSYFKSYPERLMLRAKEGTTVKVRNGNRNSFVQAIVIQIDCSMMLIELNNTKQRMWLYRGSTLIEQMNTYYVTQNRVDRN…
>Av_s135
MDIENVLRPFDDERLYLRKLRQSSTVEPILLRLFDLLKPDDYRLLFSTINRQKLDYKWLETFSKLCMQRYLEMDDVFFSDKLLSNSIRSESHSKSILENYTNYLIENFKNCFTIQYFRAIIYELEQLNHFKIEQISKQLNENNDIIQKLFLLFNNNPQFSDDSIIHLSSTPAQPIHVNYKAIHMIFLSTPVCIQNHHDLRLPAIGITNTFIADLVNTKKVDILDELTKKTYEIPTNYLYFGKACEKNIILPLKLRVMIVDHQTKQRRYGIIGEEPGKNNNYRCLIFFTEDNENISASYHLSSEIHICLDQIFECENNFLNSYFKSYPERLMLRAKEGTTVKIRNFNSNNRNAFLQATVIQIDCSMMLIEVNNTKQRSWIYRGSTLIEQMNNYYITQNKV…
>AvL1_135
MDVESVLRPFDDERQYLRKLRQSSTIEPILLRLFDLLKPDDYRLLFSTINRQKLDYKWLETFSKLCMQRYLDLDDAFFSDKISSNKIRSESYSKSILENYTNYLIENFKNFFTIEYFHTIIYEIEQLNHFKIEQISKQLNENNDIIQKLFLLFNNNPQFYDDSIIHLSSTPAQPIHINYKATHMIFLRTLVFIQNEYDLRLPTKGITNTFIADLINTKKVDILDEKTNKTYEIPTKRLYFGKPCEKNIILPLKLRVMIIDCQTNQRRYGIIGEESGKNNNYRCLIFFTEDNENISSSYHISSEIYICLDQTFECENNFLNCYFKSYPERLMLRAKEGTTVKIRHLNRNCFLQAIVIQIDCSMMLIELNNTKQRMWIYRGSTLIEQMNNYYKTQNKLDTN…
>A_steineri_CAF1123894.1
MDIKSVLRPFDDERQYLQKLRQSSTIEPILLRLFDLLKPEDYRLLFSTINRQKLDSKWLETFSKLCMQRYLDIDDIFFSDKILTNQLKPESNSKSILENYTNYLIENFKNFFTVHYFHAIIHELEELNHFKTEQITKQINKNNDIIQKLFLLFNNNPQFNDDSIIHLSSTPAQPIYLNYKVIHMVFLRTSVLIKNDGDLRLPLKGITTAFVADLKTTKIINILDETNNKSYDIPSKWLYFAKECDKNIILPLKLRVLIIDSQTGQYRFGLIGEEPGKNNNYRCLIFFTDDKTNISASYHDSSDIHVCLDQTFECENDFLNCYFKSYPERMMLRAKEDTIVKIRNINSTNKNSFIPATVIQIDCSMMLIELSNTKQRIWIYRGSTLIEQMNNYYLTQNKA…
>Rotaria_socialis_CAF3630345.1
MDIESVLKPFDDEQQYLRKLRNSSAIEPILLRLLDLLNDDDYRLLFSSINRQKLDSKWLETFSKLCMKRYLEVDDIFFADHNLTNKIKSESSSKSIFDSFINYLKENFQNGFSVHYFHAIIYELEQLNQFKIDEISKQLKKNNEIIQKLFLLFENSPNIVDDSIIHISSTPAQPIYINYKPVHMVYIRTEVIIKNDHNLQLPTKGIVNKFVADLIHTNVINILEEKTNKTYDIPTKYLYFAQSCEKNIILPLKLRVLIIDGQTKRHRFGLIGEEPGKNNQYRCLIFFTDDTANISASYHSSSDIHICLDQKFEYENDFLNSYFKSYPERMMLRAKEGTIVKIRNPLFITRNVFLQAMVIQIDCSMMLIELSNTRQRFWIYRGSTLIEQMNNYYTTQNSN…
>Rotaria_sordida_CAF0924710.1
MDIESVLKPFDDERQYLKKLRKSSAIEPILFRLFDLLNAEDYRLLFSSINRQKLDYKCLEIFSKLCMKRYLELDDIFFSENNFPNKIKSELNRKIIFQTYINYLKDNFKNFFSIHYFHAIIYEFEQLNNFKIEQISKQLNKNNEIIQKIFLSFNNNNHHYHQFNDDSIIHISSTPAQPIHLNYKPIHMIYIHTPVLIKNDHNLQLPSKGLINTFVSDLMNTKIVNILNETTNKTYDIPTKYLFFAQSCEKNIILPLKLRVLIIDSQTGQYRYGLISEEPGKNNNYRCLIFFIDDKINISANYYLSSDIHICLDQTFEYENDFLNCYFKSYPERMMLRAKEGTIVKIRNIFSTNKNLFIQAIVIQIDCSMMLIELSHTKQRIWIYRGSTLIEQMNNYYST…
>Rotaria_sp_Silwood1_CAF0915495.1
MDIESVLKPFDDERQYLEKLRKSSTIEPILLRLFDLLNVDDYRLLFSLINRQKLDYKCLETFSKLCMKRYLEIDDIFFSENNFSNKIKTEFNTKSTFQNYIDYLKENFKKFFSIHDFHAIIHEFKELNHFKIEQISKQLNKNNEIIQKLFLLFNNNHHLTDDSIIHLSSTPAQPIYLNYKPIHMIHLNTSVLINNEHNIQLPLKGITNNFVSDLINTKIINILDETTNKTYDISTKYLFFSQSCEINIILPLKLRVLIIDSQTGQYRCGLIGEEPGKNNNYRCLIFFIDDKINISANYYSSSDIHICLDQKFEYENDFLNCYFKSYPERMMLRAKEGTIVKIRNISSTNKNSFVQAIVIQIDCSMMFIELSHTKQRIWIYRGSTLIEQMNNYYSTQNNK…
>Rotaria_sp_Silwood2_CAF2769591.1
MDIKSVLKPFDDERQYLEKLRKSSSIESILLRLFDLLNAEDYRLLFSSINRQKLDYKCLETFSKLCMKRYLELDDIFFSENNFPNKIKFELNTKSIFQTYINYLKENFKNFFSIHYFHAIIHEFVELNHFKIEQISKQLNKNNDVIQKLFLSFNNNHHFIDDSIIHLSSTPAQPIYINYKPIHMIYLHTSVLIKTDYNLQLPSKGITNIFVSDLINTKIINILDETTNKTYDIPTKYLFFAQSCEKNIILPLKLRVLTIDSQTEQYHFGLIGEEPGKNNNYRCLIFFIDDKTNISANYYSSSDIHICLDQKFEYENDFLNCYFKSYPERMMLRAKEGTIVKIRNTFSSTNKNLFVQAIVIQIDCSMMLIELSQTKQRFWIYRGSTLIEQMNNYYSTQNN…
>Dcar_s01445
MYFVLIFRVRRELLKPFREEQQYLEKLRQSDSVEQILICLFNLLNVNDYRSLFYDTNNENGSGTNKTVQWIIEFARLCSRRYFEFDDLLCQENQKSIHTIALSQQQHHSFIIENKLNQLIEDLKKRFELRYFLKIIQELEFIVQKKIEKILDILNEYDKIDNINYLTANEDVVHVVSTTPESNRTAYASYKHPFMLYVDSELHIRKSIKQDLLQQIPEFGLVNKFVGDLPNAQTISVKDPKTNLVYDILTKYLYFAKPCNANAILPPKSRVCVLDKTSSVAIRRYGFIAESPSTSNGFRCLVFYDDLNISSKYHLSQEIYLCLNQNLAQHLQDCKQYLPKIAYDFLERYFQSYPERTMLRTKIGQIIKVKNILISTSSTLAEKQSYQTAKIDHIDSSMM…
>Dcar_s07209
MNNFFNYLRDVPPLFLTLHIYSHQIDNEKLRQSNSVEQILLCLFNLLNVDDYRSLFYASVSENSGCGSKTVQWIIQFAQLCSRRYFEFDDLLSQQYQKSIHATAISQQQHHSFIIENKLNQLIEDLKQCFELRYFSKIIQELEFIVKGKIEKILEILNEYDKMDNTNYSPVNEDVVHVPSTTLKSNRSTYAPYKHPFMLHVNSELHIRKHVSQDSTQQQYSERGIVNKFVGDLPNAQTISIKDPDTNLVYDIPTKYLYFAKPCDANAIIPPKYRACVLDKTLSVPIHRYGFIAEPPSTSNGFRCLVFYDDSNISSKYHLSQEIYLCLDQNLSQHLQECKQHLSKLAYDFLERYFQSYPERTMLRTKIGQTIKVKNILTPGLSTPAKKQSYQTAKVDHID…
>Av_s150
MPLAIDVGQRVLVYNPSHGWTMAYFVRAQQTNDNKLQILTCRLSNCHHKPTSQDHYRYPPERVALNDSINEQVNVGTRVLCMPSGDADTSRYIDKPLRGIIAEQPANDNDQRYLIFADSDSPFYLRSTAIRLLLEPLSNYLSKVDLGTKQYIENYVLTYPKRRLVNISVKDHINIELNGQWIDAIVSKVDASLMRVFLPVLNKHEWLYRGSLRLQPLFNSLSTYEPPCKRFASEKSLTINHNNKCHFLLIPLNYGWKRQIRNDLGTIVYISPCGQMFTDGERLHAFLYQTESLLSIRQFTFDMNCRVTQKFISPNTAFVNLEDYTSGKDNVPLMLVNEIDSTLPKSFEYITERIPYTSDISIDKDNIKGCSCTDGCIDTTKCACWQKTYDGIIRSHYYE…
>AvL1_150
MPLAIDVGQRVLVYNPSHGWTMAYFVRAQQTNDNKLQILTCRLSNCHHKPTSQDHYRYPPERVALNDSINDQVSVGTRVLCMPSGDADTSRYIDKPLRGIIAEQPSNDNDQRYLIFADSDSPFYLRSTAIRLLLEPLSNYLSKVDLGTKQYIENYVLTYPKRRLVNVSAKDHINIELNGQWIDAIVSKVDASLMRVFLPVLNKHEWLYRGSLRLQPLFNSLASYEPPCKRFASDKPLIATNINNKCHFLLIPLNYGWKRQIRNDLGTIVYVSPCGQMFTDGERLHAYLYQTESSLSIRQFTFDMNCRVTQKFISPNTAFVNLEDYTSGKDHVPIMLVNEIDSTVPKSFEYVTERISFTSDIIIDKDNIHGCSCTDGCIDTTKCACWQKTYDGIIQSHYY…
>Ar_s00019
MPLAIDVGQRVLVYNPSHGWTMAYFVRAQQTNDNKLQILTCRLANCHHKPTSQDHYRYPPERVALNDSINDQVSVGTRVLCMPSGDADTSRYIDKPLRGIIAEQPSNDNDQRYLIFADSDSPFYLXXXXXXXLLEPLSNYLSKVDLGTKQYIENYVLTYPKRRLVNASVKDHINIELNGQWIDAIVSKVDASLMRVFLPVLNKHEWLYRGSLRLQPLFNSLSSYEPPCKRLATEKPLTLTNNKCHFLLVPLNYGWKRQIRNDLGTIVYVSPCGQMFTDGERLHAFLYQTQSLLSIRQFTFDMNCRVTQKFISPNTAFVNLEDYTSGKDNVPIMLVNEIDSTLPKPFDYVTERIPLTSDIVMEKESIKGCSCLDGCIDTTKCACWQKTYDGIIQSHYYED…
>A_steineri_CAF1447804.1
MPLAIDVGQRVLVYNPSHGWTMAYFVRAQQTHDNKLQILTCRLSNCHHKPTSQDHYRYPPERVALNDQINDQINVGTRVLCMPSGDADTSRYIDKPLRGIIAEQPSIENDQRFLIFADSDSPFYLRSNAIRLLLEPLSNYLSKVDLGTKQYIENYVLTYPKRRLVNVSVKDHINIELNGQWINAIVSKVDASLMRVFLPVLNKHEWLYRGSLRLQPLFNSLSSYEPPCKRFASDKQSIVNNNNKCHFLLIPLNYGWKRQIRNDLGTIVYVSPCGQMFTDGERLHGYLYQIDSPLSIRQFTFDMNCRVIQKFISPNTAFVNLEDYALGKEKVPLMLVNEIDSTLPKQFEYITERIPYTSDITIDKDNTKGCSCLDGCIDTTKCACWQKTYDSIIQSHYYE…
>Rmac00024
MPVAIDVGQRVLVYNPSHGWTTAYFVRAQETNDNKLQILTCRLSNCHHKPTSQDHYRYPPERVSLSDNINDNVNVGTRVLCLPSGDADTSRYIDKPLRGIIAELPSINNNQRYLIFADNDAPFYLRSNAIRLLLESLSNYLSKVDLGTRQYIENYVLTYPKRRLVNITAKDHINVELNGQWIDAIVSKVDASLMRVFLPMSNKHEWLYRGSLRLQPLFNSPSSYEPPCKRFASDKQLTVNDSRCHFLLIPLNHGWKRQIRNDLGTIVYASPCGQIFTDGERLHAYLYQINSPLSIRQFTFDMNCRVTQKFISPNTAYVNLEDYTLGKEKVPLMLVNEIDSSLPEPFEYITDRIPLTSDIIIDQNNIHGCTCTDGCLDTTKCACWQKTYDAIIQSHYYED…
>Rmag00556
MPLAIDVGQRVLVYNPSHGWTVAYFVRAQQTNDNKLQILTCRLSNCHHKPTSQDHYRYPPERVALNDSIGENVNVGTRVLCMPSGDADTSRYIDKPLRGIIAEQPSNINNQRYLIFADSDAPFYLRSTAIRLLLEPLSNYLSKVDSGTKQYIENYVLTYPKRRLVNIAVKDHINIELNGQWVDAIVSKVDASLMRVFLPVINKHEWLYRGSLRLQPLFNSPSTYEPPCKRFASDKQSTTNDSKCCHFLLIPLNHGWKRQIRNDLGTIVYASPCGQMFTDGERLHAYLYQTNSSLSIRQFTFDMNCRVTQKFLSSTTVYVNLDDYALGKDKVPLMLINEIDSSLPKPFEYTTERIPLTSDIVIDQLNTHGCTCIDGCLDTTKCVCWQKTYDGIIQSHYYD…
>Rotaria_socialis_CAF3298732.1
MPLAIDVGQRVLVYNPSHGWTVAYFVRAQQTNDNKLQILTCRLSNCHHKPTSQDHYRYPPERVALNDSIGENVNVGTRVLCMPSGDADTSRYIDKPLRGIIAEQPSNNNNQRYLIFADSDAPFYLRSTAIRLLLEPLSNYLSKVDSGTKQYIENYVLTYPKRRLVNVAVKDHINIELNGQWVDAIVSKVDASLMRVFLPVINKHEWLYRGSLRLQPLFNSPSTYEPPCKRFASDKQPTTNDSKCCHFLLIPLNHGWKRQIRNDLGTIVYASPCGQMFTDGERLHAYLYQTNSSLSIRQFTFDMNCRVTQKFLSSTTVYVNLDDYALGKDKVPLMLINEIDSSLPKPFEYTTERIPLTSDIVIDQTNTHGCTCTDGCLDTTKCACWQKIYDGIIQSHYYE…
>Rotaria_sordida_CAF0735426.1
MPVAIDVGQRVLVYNPSHGWTTAYFVRAQQANDNKLQILTCRLSNCHHKPTSQDHYRYPPERVALNDNINDNINVGTRVLYMPSGDADTSRYIDKPLRGIIAEQPSLNNNQHYLIFADNDAPFYVRSNAIRLLLESLSNYLSKVDLGTRQYIENYVLTYPKRRLVNISAKDHINIESNGQWIDAIVSKVDASLMRVFIPILNKHEWFYRGSLRLQPLFNSLSSYEPPCKRFASDKQLTINDNKCHFLLIPLNYGWKRQIRNDLGTIVYVSPCGQMFTDGERLHTYLYQINSPLTIRQFTFDMNCRVIQKFISPNTAFVNLEDYALGKEKVPLMLVNEIDSSLPKPFEYIIDRIPLTSDIIIDKNNINGCTCTDGCLDITKCACWQKTYDAIIQSHYYED…
>Rotaria_sp_Silwood1_CAF1175429.1
MPLAIDVGQRVLVYNPSHGWTTAYFVRAQQANDNKLQILTCRLSNCHHKPTSQDHYRYPPERVALNDNINDNVNVGTRVLCMPSGDADTSRYIDKPLRGIIAEQPSIINNQRYLIFADNDAPFYLRSNAIRLLLEPLSNYLSKVDLGTRQYIENYVLTYPKRRMVNISVKDHINIELNGQWIDAIVSKVDASLMRVFIPILNKHEWLYRGSLRLQPLFNSVSSYEPPCKRFASDKQMTINDNKCHFLLIPLNHGWKRQIRNDLGTIVYASPCGQMFTDGERLHTYLYQINSPLTIRQFTFDMNCRVTQKFISPNTAYVNLEDYAFGKEKVPLMLVNEIDSSLPKPFEYITKRIPLTSDIIIDQNNIHGCTCTDGCLDTTKCACWQKTYDAIIQSHYYED…
>Rotaria_sp_Silwood2_CAF3855216.1
MPLAIDVGQRVLVYNPSHGWTTAYFVRAQQANDNKLQILTCRLSNCHHKPTSQDHYRYPPERVALNDNINDNVNVGTRVLCMPSGDADTSRYIDKPLRGIIAEQPSSNNNQRYLIFADNDAPFYLRSNAIRLLLEPLSNYLSKVDLGTRQYIENYVLTYPKRRLVDISVKDHINIELNGQWIDAIVSKVDASLMRVFMPILNKHEWLYRGSLRLQPLFNSLSTYEPPCKRFASDKQIIVNDNKCHFLLMPLNHGWKRQIRNDLGTIVYASPCGQMFTDGERLHTYLYQINSSLTIRQFTFDMNCRVTQKFLSPNTAYVNLEDYALGKEKVPLMLVNEIDSSLPKPFEYIAERIPLTSDIIIDQNNIHGCTCTDGCLDTTKCACWQKTYDAIIKSHYYED…
>Rmag00606
MPVAIDVGQRVLVYNPSHGWTLAYFVTAQQNNDNKLQILTCRLSNCHHKATSQDHYRYPPERVALNDTIGNNLNVGTRVLCMPSGDADTSRYIDKPLRGIIAEQPSSINNQRYLIFADNDSPFYLRSIAIHLLLESLSNYLSKVDLGTKHYIENYVLTYPKRRLVNISAKDHINIELNGQWIDAIVSKVEGSLMRVFLPILDKHEWLYRGSLRLQPLFNSVSSYEPPCKRFAVNKETTIDNKCHFLLIPLNQGWKRQIRNDLGTIVYISPCGQMFTDAERLYSYLFQIDSLLNIKQFSFDMNCRVTQKFISLKQPIVQIEDYSNERENVPLMLVNEYDSTLPKIFEYITDRIPLTSDIVIDKSTIQGCSCTDGCLDTTKCACWKKTYDAIIESHYYEDL…
>Rmac00671
MPVAIDVGQRVLVYNPSHGWTLAYFVTAQQTNDNKLQILTCRLSNCHHKATSQDHYRYPPERVALNDTIGNNLNVGTRVLCMPSGDADTSRYIDKPLRGIIAEQPSSINNQRYLIFADNDSPFYLRSIAIHLLLESLSNYLSKVDLGTKHYIENYVLTYPKRRLVNVTVKDHINVELNGQWIDAIISKVEGSLIRIFLPMLNKHEWLYRGSLRLQPLFNSLASYEPPCKRLALDKDIRIDNKCHFLLIPLNQGWKRQIRNDLGTIVYISPCGQMLTDAERLQSYLFQIDSKLNIKQFSFDMNCRVTQKFISPKKAFIQIEDYSYEHEKVPLMLVNEYDSTLPKTFEYINDRVPFTSDVVIDKTTIQGCSCLDGCLDTTRCACWRKTYDAIIESHYYEDL…
>Ar_s16a
MPVAIDVGQRVLVYNPSHGWTLAYFVTAQRTSENKLQILTCRLSNCHHKATSQDHYRYPPERVALNDTVADNLNVGTRVLCMPSGDADTSRYIDKPLRGIIAEQPSSANSQRYLIFADNDSPFYLRSIAIHLLLESLSNYLAKVDLGTKHYIENYVLTYPKRRLVNVSAKDHINIELNGQWVDALVSKVEGSLIRVFIPFLNKHEWLYRGSLRLQPLFNSLSSYEPPCKRLAVEKETKIDNKCHFLLAPLNQGWKRQIRNDLGTIVYIAPCGQMFTDADRLQNYLFQMDSILNIRHFSFDMSCRVTQKFMVSEKPLVQIDDYSYEREKVPLMLVNEMDSSLPKTFEYVADRIPLTNDIVIDTSTLQGCSCTDGCLDPTKCACWKKTYDAIIDSHYYEDV…
>Av_s8
MPVAIDVGQRVLVYNPSHGWTLAYFVTAQQTNDNKLQILTCRLSNCHHKATSQDHYRYPPERVALNDTVANNLNIGIRVLCMPSGDADTSRYIDKPLRGIVAEQPSSINNQRYLIFADNDSPFYLRSIAIHLLLESLSNYLSKVDLGTKHYIENYVLTYPKRRLVNVSAKDHINIELNGQWVDAIISKVEGSLIRVFIPFLNKHEWLYRGSLRLQPLFNSLSSYEPPCKRLAIEKDIKIDNKCHFLLIPLNQGWKRQIRNDLGTIVYISPCGQMFTDADRLQSHLFQMNSILNIRQFSFDMNCRVTQKFILSKPSLIQIDDYSSEREKVPLMLVNELDSTLPKTFEYITDRIPLTADITIDTSTIQGCSCTDGCLDPTKCACWKRTYDALIESHYYEDV…
>AvL1_8
MPVAVDVGQRVLVYNPSHGWTLAYFVTAQQTNDNKLQILTCRLSNCHHKATSQDHYRYPPERVALNDTVNNNLNVGTRVLCMPSGDADTSRYIDKPLRGIIAEQPLSMNNQRYLIFADNDSPFYLRSTAIHLLLESLSNYLAKVDLGTKHYIENYVLTYPKRRLVNVSAKDHINIELNGQWVDAIISKVEASLIRVFIPALNKHEWLYRGSLRLQPLFNSLSSYEPPCKRLAIDKEMKIDNKCHFLLVPLNQGWKRQIRNDLGTIVYISPCGQMLTDADRLQIYLFQMDSILNIRQFSFDMNCHVTQKFLLSQTPLIQIDDYSSEREKVPLMLVNELDSSLPKTFEYVTDRIPLTTDINIDTSTIQGCSCTDGCLDPTKCACWKKTYDAIIDSHYYEDV…
>Adineta_steineri_CAF1503371.1
MPVAIDVGQRVLVYNPSHGWTLAYFVTAQQTNDNKLQILTCRLSNCHHKATSQDHYRYPPERVALNDTIGNNLNVGTRVLCMPSGDADTSRYIDKPLRGIIAEQPSLSNSQRYLIFADNDAPFYLRSIAIHLLLESLSNYLSKVDLGTKHYIENYVLTYPKRRLVNVTAKDHINIELNGQWIDAIISKVEGSLIRVFIPVLNKHEWHYRGSLRLQPLFNSLSSYEPPCKRLAIDKDTTIDNKCHFLLIPLNQGWKRQIRNDLGTIVYISPCGQMFTDAERLQSYLFQINSILNIKQFSFDMNCRVTQKFISPKTAFIQIDDYSYQLEKVPLILVNEYDSSLPKKFEYITDRIPLTSDIIIDKTNIEGCSCIDGCLDTTKCACWIKTYDGIIQSHYYEDL…
>Rotaria_socialis_CAF3277097.1
MPVAIDVGQRVLVYNPSHGWTLAYFVTAQQNNDNKLQILTCRLSNCHHKATSQDHYRYPPERVALNDTIGNNLNVGTRVLCMPSGDADTSRYIDKPLRGIITEQPSSINNQRYLIFADNDSPFYLRSIAIHLLLESLSNYLSKVDLGTKHYIENYVLTYPKRRLVNISAKDHINIELNGQWVDAIVSKVEGSLMRVFLPILNKHEWLYRGSLRLQPLFNSVSSYEPPCKRFAVNKETTIDNKCHFLLIPLNQGWKRQIRNDLGTIVYISPCGQMFTDAERLYSYLFQIDSLLNIKQFSFDMNCRVTQKFISLKQSIVQMEDYANERENVPLMLVNEYDSTLPKIFEYITDRIPLTSDIVIDKSTIQGCSCTDGCLDTTKCACWKKTYDGIIESHYYEDL…
>Rotaria_sordida_CAF1396166.1
MPVAIDVGQRVLVYNPSHGWTLAYFVTAQQTNDNKLQILTCRLSNCHHKATSQDHYRYPPERVALHDTITNNLNVGTRVLCMPSGDADTSRYIDKPLRGIIAEQPSFNNNQRYLIFADNDSPFYLRSIAIHLLLESLSNYLSKVDLGTKHYIENYVLAYPKRRLVNISSKDHINIELNGQWIDAIVSKVECSLIRVFLPLLNKHEWLYRGSLRLQPLFNTLSSYEPPCKRLAINKDIKIDNKCHFLLIPLNQGWKRQIRNDLGTIVYISPCGQMFTDAERLQTYLFQIDSLLNIKQFSFDMNCRVTQKFISPKKSFIQIDDYSYEHEKVPLILVNEYDTTLPKTFEYITDRIPLTSDIIIDKTTIQGCSCLDGCLDTLKCACWKKTYDAIIDSHYYEDL…
>Rotaria_sp_Silwood1_CAF0970338.1
MPVAIDVGQRVLVYNPSHGWTLAYFVTAQTTNDNKLQILTCRLSNCHHKATSQDHYRYPPERVALHDTVNNNLNVGTRVLCMPSGDADTSRYIDKPLRGIIAEQPSSINNQRYLIFADNDSPVYLRSIAIHLLLESLSNYLSKVDAGTKHYIENYVLTYPKRRLVNVSVKDHINIELNGQWIDAIISKIEGSLIRVFLPLLNKHEWHYRGSLRLQPLFNSLSSYEPPCKRIAIDKNIKIDNKSHFLLIPLNQGWKRQIRNDLGTIVYISPCGQMFTDAERLQIYLFQNDSLLNIKQFSFDMNCRVTQKFISPKKSFIQIEDYSYEREKVPLILVNEYDTTLPKTFEYITDRIPLTSDIIIDKNTIQGCSCLDGCLDTLKCACWKKTYDGIIQSHYYEDL…
>Rotaria_sp_Silwood2_CAF2541019.1
MPVAIDVGQRVLVYNPSHGWTLAYFVTAQQTNDNKLQILTCRLSNCHHKATSQDHYRYPPERVALNDTVNNNLNVGTRVLCMPSGDADTSRYIDKPLRGIIAEQPSLINNQRYLIFSDNDAPFYLRSIAIHLLLESLSNYLSKVDTGTKHYIENYVLTYPKRRLVNISAKDHINIELNGQWIDAIVSKVEGSLIRVFLPLLNKHEWHYRGSLRLQPLFNSLSSYEPPCKRLAISKDIKIDNKCHFLLIPLNQGWKRQIRNDLGTIVYISPCGQMFTDAERLQTYLFQIDSLLNIKQFSFDMNCRVTQKFISPKKSFIQLEDYSYEREKVPLMLVNEYDTTLPKTFEYITDRIPLTSDIIIDKNTIQGCSCLDGCLDTLKCACWKKTYDGIIQSHYYEDL…
>Dcar_s00048
MPVAVDVGQRLFVYSPHRLWTVAYFVKVIITETNLQIVTCRLAHCSHSQTSGEHLRYSPHNVAIADRIAEHQLNVGSRILCIPSNSSHIGLSCKKIEKPQRGMIAELATESNSNRFLIFVDIGEPYYIQCHSIRLLLEPLSNYLSKVDQGTKQYIENYVLTYPKRRLIDIGVKSHITIEHNGQWLEAIVSKCDCTLIRVYIPSLNELEWLYRGSLRLQPLFNLLTTSVNDDEPTSKRFAIDLEQQQEHRCTNSCEKGLSITRKCNFLMIPLNYGWKRQVRNDLGTIVYISPCGQPFTDRERLHLYLIQINSCLTMNLFSFEMDCRATQKYNLLNPPIIDIMDYSNELEKLPLSLVNEINNELPTKFDYICTRISSKDEIPINELKDYIEGCTCTDGCLE…
>Dcar_s00106
MPVAVDIGQRLFVYSPHRSWTVAYFVKVIVKDTNLQIVTCRLARCPHSPTFGEHIRYSPHNVAIADRITDQQLNVGSRILCIPSNSLNTDVSCKQIEKPQRGMIAELATESNSNRFLIFADIGEPYYIQCNSIRLLLESLSNYLLKVDQGTKQFIENYVLTYPKRRLIDVGVKSRITIEYNGQWLEGIVSKCNCTLIRVYIPSLNKQEWLYRGSLRLQPLFNSLTTNVTTYDDEPTSKRLAIDLQQHQEHRCTNACEKSLPLARKCNFLMIPLNYGWRRQVRNDLGTIVYISPCGQAFTDRERLHLYLRQINSCLTMNLFSFEMDCRATQKYNLINPPIIDIADYSNNLELLPLSLVNEINNELPTKFDYICTRVPSRDEIPINELKDSIQGCTCTDGC…
>P_laevis_1
MSPANLENAMKRLNGTDGNPPTTLLYDNITEDFVLNFCIRLYKRVFRNAVHLLSNFTKEIYMDIANSHNDSHECMLFRIIELCKNMCTEPSSVANLEVSDFQSVKNLVDLINESKYASYLERTQTCLKNDMIYFYKLLNEQRKKLQYATSNRSSTELECKSCISLMNDNVWHQAVLITNIDEYDVIVQVVDTHSKTVTSISKTKVALVDMDANIGDIVLTRVSKTGRFEIGKVAETPCIRNSYRYLIFFDHDFIEYCASDVYRILNQNCESTAGTDEYKHFVKQYFRNYPDRPMIRLRSGENIHFLRNYLENSNHEWVETKIIRIDCSMMLLKYQDEMEWVFRGSPRLQPMHRLYAKRIRANEIPDVAIANNKNSLTNQQTNDNISLPLAKKSGSQRRT…
>P_laevis_2
MSLTNLEKAMNGDEDTNDGEMSTLSSLVTKQFVTDICTGLYKQMSVNTIQMLNNFKRDICADKLDREGKHDLLSRIIEQCKNMRIETSSGNPQKEKHTHTLLLRRLFNLINQSQYANYLERTQTCIKNDMMEFYRFLEKELEKLQYAISNRSSTELECKSCIALMNDNVWHQAVLITNIDEYDVIVQVVDTHSKTVTSMSKTKVALVAMDANIGDIVLSRVSKTGRFEIGKVAETPCIRNSYRYLIFFDHDFIEYCASDVYRILNQNCESTAGTDEYKHFVKQYFRNYPDRPMIRLRSGENIHFLRNYLENSNHEWVETKIIRIDCSMMLLKYQDEMEWVFRGSPRLQPMHRLYAKQIRANEIPDVAIANNKNNLTNQQTNDNISLPLAKKSGSQRRMN…
>B_caly_NTPY01000915
MLGELNMNTNKSININIDEEKIKAINEDFTKSLEEYVFDAINVVRNQISFLLKEPVNDSIRLSDSIRDLGPDRINLIVSTIVKMNRRKLNEKFKEKLQKITQVVNSLNQKLRLDELINFDSFYQKTQQLMEKFDQHLPILSRTIRNKYKKKLKKKIKSCGETDFFSDTEILSRSHKCSKNKIDRLLHKFKNLDFDEDDNQSDSSSLSSEDESDFKILSKKYSYSDTLLYQDNAEMEISFLAESARSDISSDEDIDGNYADQSSDSYSNSNSFSSNILTEDMEQEVDNLYRILEHPDSDQERPEIENLPNDKINEDEDCVIICENDYPSSSKTSKKLNKCLELIDKLISSNKEINRPRPPITLGMKCLALKDRQRFKWKLGHITRITDNKLLEIDPSSTG…
>B_pli_RNA32532
MLEEINQTLNKNMSVKSSLFEEKSKGLIEELYKTLEEYFEDALKTVQNQVSLLIREPINESLQMSHSIKNLCPERLSLLASEIAQINRQKLDVKIKSKMESLKKVAGDLAKNSNCEFRLDEIVNFDLFYSKVEDLMKKFDDILPNVYADLKQNLAIRVTKKSHRLKETDFFSDTEVLEQSRKISKKKIKRLLANLKNSHLASNSDRSSFSDDDESNKKNFKQLFYSYSDSLLYQDNLEMDVGCFNDNDHSLSSDTSSVSSNYCLDQEPFNSLSNSFSSCSINDDYDRDLFRNFQINSDSDEELASLEAQNLNQDEDCIIICENQNDYQTKARKSKKLNKCLQIIEKFVSTNKELKVPRQQISLGMRCLALKDRNRFKWKLARITRITDNNLLSHQVTSS…
>B_Tis_VANL01000993
MFEDISKNQNINNSTNSSNFKDKSRFLIEELYNSIEEYFEDALNAVKNQVALLIRDPLNESFMISNSIKNLCPERLNFLTSKIGEVNRKKLDVKIKSKIESLKRVGDDLTKNYNCKLSIDELINFDIFNDKVGMLMKKFDKILSTIFTDLKSSSILKKKEKKRQKETDFFSDTELIELSRKISKKKKKKLMKKFKDLNFDSETSFISDDESNFKNLNQYFSSYSDTLLYQENLELNTMSFGESYSMRSNNSLISNCSFYHEQLDSLSNSNSYSISSFSIINEDFQRKYQSSSDSENELINIETEALNQDQDCVIICENDFQIKNKKSKKLNKYLEIIDKLIISNKEMKSPRQQISLGMRCLALKDRNRFKWRLARITRITDSNLLNHQANQNNSSQIYK…
>B_kor_QDF21443
MFEEICKNQNINNSTNSSLFEDKSKFLIEELCKSIEEYFEDALNAVKNQVSLLIRDPLNESFMISNSIKNLCPERLNFLTSKIGEINRQKLDVKIRSKIESLKRVGDDLTTKYNCKLRIDELINFDMFNDKVGMLMNKFDKIMSTIFTDLKSNSILKKEKKTKRQKETDFFSDTEVLEQSRKVSKKKIKKLMTKFKDLNFDSETSFISDDESNLKNINQCFSSYSDSLLYQESLELNAVSFGESCTMRSNYSSTSNCSFYQEQLDSLSSSNSNSNSSFSIINEDFQEDILRKYQSSSDSETELINIETETLKQDEDCVIICENDFQIKNKKSKKLNKYLEIIEKLIKTNKEMKSPRQQISLGMRCLALKDRNRFKWKLARITRITDSNLLNQQSSLNQN…
>B_rotun_VATC01000035
MFEQINQNLNNNVSLNQDLFKEKTKSLIEEVYNSLEEYFEDALKAIESQVSLLIREPLNESVQISKSIKKLCPDRLCLLTSKIAAINREKLDSKIKSKIESFKKSADELTRKYNCELQIVDQINFDTFYYKVENLMIKFDKILPTIYYNLKYNSAIGTTNKSFIRKETDFYSDTELIERSSVSDMSSLTDEEQNIQNLNHFFFSYSDSLLYQDNLEMNMENSSNSESKNDYQKKIKKSKKINKCLEIIEQFVNSNKELNVPRQQISLGMRCLALKDRNRFKWKLARITRITDSNLLNKKANLNENNLSQIYKMICNCKYTVKFDQIEHELENESDTEELLITSNSSDNDVVDHDCEKNNLKERRFIKKRTISTNIGLVELDAKSIAFLDNYEFIPNIYS…
>Lottia_gigantea_XP_009047854
MAEESTIKLNDLNSLISDIFEEVITSDDVRSQWKSDVDPINGQVRSAENESNKMSYLRRSVMIYQSLTECAKGYMYKELNNKAKNAARSAAEAQRKVDMTIDDDDDDDVKIVASSFDPMVIARRKAASKTESSPVSQTPLHPNNHSPKHRKSILAIHAPWMVRPLAKLLFHQFLSLAHLVKQGSLIYAKKYNDIWYPAIVTELHNPNTSAVQYRIRFESKGHKMLSGKHIAYRDPIHIVLRVGSRVIAFYRDDEAPGGNSYYAGIVAEAPSLKNQRRFLIFFDDGYAQYTKASEIHKVVSQSDNVWEDVYPESQDFIRDYLSQYPERPMVRLQKGQGVQTEWNGRWWTAKVMEVDASLVKMYFQADKRTEWIYRGSTRLEPLFKALANLEAHKGSSKGR…
>Pomacea_canaliculata_XP_025086877
MAEKAVEQLIYELSLSKVELDELISSIVDNMGQEVENISTTTEYQDTNALINKAERRAKDINKSFLQLEAKADAYMEEMKTEEKELEEQVRQREAEVAASCQIIDDDSDDDVTIIDSTFEPRKRGAPSPVGGRRASVPPLKQKPLPPPPPLLTKEQMSSSAPKVEMLGASPPPLTMNIGGTVVPTADDGVPNMEHLRAALTNALNRQVAPSAAPQQLADSKLPSEIYVYPPPKVKILNFGNKEQTSKEGELAPKLLKLNVTTSASTSSASQSVLGTMPTVWKEITTGSKVLAKKFNDIWYSGVVTDVQKPENTKHPGEKPENTKNPGEWKYRVKFDGKGLKVLSGHHIAYREPISCFLKVGTRVAALYRDDETSSGSSFYAGIVAEAPSIKNNKRFLVF…
>Octopus_vulgaris_XP_029638579
MTSFATFSESDEVGKDQVDEEEMEVEKDADANGNSKSDQDTQETSREEKPPKLSEKSGSDSVISNIKKDDDRDVTSSETEIAEKKVTIKVEERSENTSSHGDTDICSSADITKKADINGKKQMQEAVKDFEGKKRRENILKSGDEICEQKRPRILDAQKVEHSNTSDNEEGKEDMAAAAESPKADDTEMKMEDVEKGSNKKVKTESDDNENSMEVDEPSVAGIIKEEDESGCRGLDQKITVKQEVRNVKEEITASKEEVGTMKEGKNGIKEEIDMSSFKKQLKEEDVKDIKLVNGIKKPETIYKLSFDAEKFISNQISKMDLDQTNLQKLNGMNCQVKATERKQREISKIFSDCTNLLAKFRATLEATEAIESEEKVGGNVETVEISDDDEVEFIETTF…
>Octopus_bimaculoides_XP_014776504
MTSLATFSDSDEVGKDQVDEEEMEVEKDADADANDNSKPDQDTQETSKEEKPSKLSEKSGSDSVISNIKKDDDRDVTSSETEIAEKKVTIKVEAKSEDTGSDGDNDICSSADTTKKADTNGNKQMQEAVKDFEGKKRRENTLKSLDDRDISDQKKPRILDTKKVEHSNTSDNEEEEEEDMAAAESPKADDKEMMKMEDVEKGSKKKLKTESDDNENSMEVDEPSVVGTIKEEDESGCRGLDKKITVKQEVRNVKEEVTASKEEVGAMKEGKNGIKEELDVSSFKKQLKEEDVKDIKLVNGIKKPETIYKLSFDAEKFISNQISKMDLDQANLTKLNGMNCQLKATERKQREISKIFSDCTNLLAKFRATLEATEAIESEEKVGGNVETVEISDDDEVEF…
>Crassostrea_gigas_XP_019924614
MSECCKMETASTPSEMPPPQTKDVIKNGKAVVEILDSDSESDDPIYKFKFDIEDLITSTLNEFGGPERDEESPQMTETLNDLNGQIKGIERKQKEIEKIFSNCEERLRVYQQELEEADKEEINEESRLRLKEVTAELEAKEAAEANAKAEETDSDDDVQIIASSFDAEVAAKNQRLQVLKIPPIAQAGSTSPTLANLRQALAGAINNSINQQQGTSPQPSSSSSSKTSTVLSSAQTKQAYLQMALEIKIGSKILGKKHNDIWYRGTVVDMSNDMQVAERTYTVKFDGKGRKTLPALNCAFKDSLTKPVSVGTRVVALYKDEESMASFYAGIVAETPNQRNAYRYLIFFDDGYAQYSRSDDIHKVLDQSTNVWDDIHQDSQEFIKDYLKQYPERPMVRLN…
>Crassostrea_virginica_XP_022334791
MASFYAGIVAETPNQRNAYRYLIFFDDGYAQYSKSEEIHKVLAQSVNVWEDIHQDSQEFIKDYLKQYPERPMVRLTKGQTVRTEWNGKWWTAKVEEVDSSLAKMYFLADKRIEWIYRGSTRLEPLFTALSNANKANNKMRRTHMPSSKKHVVEYTRGNSEDGNSQDSPSTSAGPKPVRYQKPVSTPPAVKNTSSPVVPGKKRSVARKSTTGSNQSNQSPLPSQGGPGGDTAQASKWEAPWLKKRLSSAGSSAGAKKSREMYSASSISSNKTGTDMASVLQERLSKAVKDEVPGKRIGIDKDEESLGERLDLVIPVNDQVRKIFTEHLCGPNCLLEDDPVKYKGTNPLLIPLLCGWERHVCKIKPAYKRSVLYRAPCARRLRNMYEVEHFLALADSNLTI…
>Mizuhopecten_yessoensis_XP_021368073
MLKVHLQDDLFDTRLRVCSVHFRDGKPTEDSPYPELNLDFNVNSHSDLLARGLDYNKHHQKNLQLFCRLCGDNECVVTKACKVHPKHRFEKDIFSSMAIDVNQDSCTVHPRNICYVCRAKLSAWKSAMQKGRPIDLQIKPAKFVPHDEPSKCLVCLNQSLRNYRPPQMSSNADSSNLGLDKPLAAMEGGKNKDEEDKLYVFDFKIDMDDLISSTLKDLEDHEDASSYQSDFTKFSQQLRSIERKTKEVRKIYTECSEKLRIYREELEEADREEELKEAAAEIDAKEAAEANAKVDEESDEDDVQFVATSYDPSVMEKRQVIATQNKNLVSALSSSPKMEPLTIPPGAVLVKLPPISQSQSGTTPSLQSLRNALAGAINKQIPSVSQSTTTVINTAPAGS…
>Pecten_maximus_XP_033752010
MQKVHLAEELLTSRLRVCSVHFRDGKPTDENPHPELKLDADENSHSKLGANDPQFNKLHQKNLQLFCRLCGDNEGVSMKVCRAYTKYRFQVDIFSSMAIDVNQDSCFVHPRNICYVCRAKLSAWKAAVQKGKPADIQIQPAKFLPHDESSKCLVCLNYSFRTGRPPQKAPATNSSNSCLDKPSTTMDVCKEKDDENKLYLLDFKLDMDDIISSTLKEFCEPNDEDTLAFHSDLSKFSQQLRSIDRKTKEVRKIYTECSEKLRIYREELEEADREEELKEAAAEIDAKEAAEANAKVDDESDEDDVQFVAATYDPSVMEKRQVLAHQNKNIVSALSAPAVGKMEPLALPPGAVLVRLPPNSQQVQRNSSPSLQSLRNVLQATINKQIPAVAQLQPTTTTV…
>Macrostomum_lignano_PAA83414
VRRGLPAAALFLSPIVASMSNGATNVCSERLAQVKSAWVSAIIHCCRQAVAPLDQNQQDCQQPLPLSTQAEIQTAFEARFYAVVPRDELQSMARKHVLDSDADSQSNNNSSFSDPIDAIVNRFLFQYLRVDEGLNRELTKCTFYQDVIRRLKVAGEKFGEVNSSVQAMDAELRARTIKFNELEAGLRAQVTVIELSDSDKDSDDDVVIIDDPTKSAVHQRCREGQGDGLVGDTLTLDIDSDDSDADVLIVDGPPAPAPIPPPPPPTSVADDSATTRAEPTAAGASIPPASKVRRLDNGEAASSTVASGGAAGVGRRVVLTAPVKLLTAENLKNLITTDLLEKPYKVHVGESVFALRDQDEWCRAVVTHELPRDAYVVRFLGAPTLAANQQPTQPQPQLS…
>Macrostomum_lignano_PAA93144
SQMHAWKTLPAMPPGWESRIDAIRRLSVSVLVSCLAEILRANHSVTGRLGTRRLWDMHMAALEEYVPRQMLARTALEYLRLTEPLVYRAVLPEFEINGKVVEVLVHKFLFQIVNIETAFHNALGSDANWSEVVNRIGSLEKTKQKLEETVRHQEKVLDRLEKRSRDQQIAWYGRVVYPASALACSSQDTDADEPNESDNRNDTQTAAAADGSSAMARKSLIMEAATAPPQSQQQQAASVLVLPSAAGQPGSQQAAANVGKYRLVHPEELVSVAVVAQQNQPVFALFDRELWRQAVIADVLEPAAGTGGTVLYRVSFAKTTKQLKPSQVALSETAETRLEQYPVGARVVSSYTDDRGLVFYYSAIVAEPPGERNSRRYLLFFDDGYAQYVPPSDVRRVLQ…
>Clonorchis_sinensis_RJW66250
MMNKSSEAKQLLDELTDAVYKSFDVNQVFEFVMGFIAQKYKTELDDVTDIALKQHIIEQRIPSALEECGLMEIVHDKLADVGLRGRLEALENEKEELQKGVQKMKESLDALVADMKNLQLNSFGRVVRLFDDRVIDLAKEDEDLQVIESPIDGTVGSAAELASKGGWRTLQPSELLIGLSLTAAQPVLCRKGRDTWFPGRIISCLAPATSNDPNSTRAVGPNSAIYRVLLDSAPGAKDEICHSSLASLALAVSAADLKQKYPVGARVVSIYRDESGGIGYYSGLIAEPPSERNNHRYLLFFDDGYTQYSPPNEIYRICHQSKENWREATEGSQDFIKRYLAQYPQRPMVRLKPGQMIETELDGDWIQATVDKVDASLVLIRFSETHSEWIYRGSTRLEP…
>Opisthorchis_felineus_TGZ72464
MMNKSSEAKQLLDELTDVVYKSFDVNQVFEFVMGFIAQKYKTELDDVTDIALKQHIIEQRIPSALEECGLMEIVHDKLADVGLRGRLEALESEKEELQKGVQKMKENLDALVADMKNLQLNSFGRVVRLFDDRVIDLAKEDEDLQVIESPIDGAVGCAAGLASKGGWRTLQPSELLIGLSLTVAQPVLCRKGRDTWFPGRIISCLAPATSNDPNSTRAVGPNSAIYRVLLDSAPGAKDEVCHSSLASLALAVSAADLKQKYPVGARVVSIYRDESGGIGYYSGLIAEPPSERNNHRYLLFFDDGYTQYSPPNEIYRICHQSKENWREATEGSQDFIKRYLAQYPQRPMVRLKPGQMIETELDGDWIQATVDKVDASLVLIRFSETHSEWIYRGSTRLEP…
>Opisthorchis_viverrini_XP_009172188
MPLLRTLKPHHSYSYLLFFDDGYTQYSPPNEIYRICHQSKENWREATEGSQDFIKRYLAQYPQRPMVRLKPGQMIETELDGDWIQATVDKVDASLVLIRFSETHSEWIYRGSTRLEPLFNDLNSAPGQAALGRSQRLEVEYGNVDASLTDKSSACKLRKARKSATGNRDSSLAENNSTVVKTASERRGSNLRRTASGRLEMADLECAGTIVPYLDGLIDQFVRKEYVPHKCTHSCLIALKKSSMSPASEDPYFYKGLNPLEIPFRAGWLRYLLVGHPNDFGRQFIVYNAPCGRQLRSMHEVQRFLDRTDSKLTTDLFSFDPNLCINSEFRAEKTFTHIADISYGKENVPVPCVNSIDNEVPGYIDYIPSRLPIGDVPLIDDDSFVVCCDCTDNCRDRTK…
>Schistosoma_mansoni_XP_018652007
MNVLKHEHRVLIDELTESIYDALDSDDIFDVIFAFVESKYQAELKDVNNPKLRLHIIQQRFSLALEECGLIDEIIESFPELNLNARLDKLKKEQSTLQSNILELNGKIDTIVDEMTRLQINSFGRVLRLFDNRVIDLAKDEEEIVVIERPNNRIPESTINHSTAPVWRTLQPAELLLGLQLTPSQPVLYRKTQHTWFPGRVLSCHLPNSDPSTPKSDKDRAKENENAQYTIALDTSSKSKSEICFAVTSSLALAFSASELRQKYPVGARVVSIYRDDTGGIGYYSGLIAEPPSERNNQRYLLFFDDGYTQYSPPNEVYRICHQSKENWKEATESSQEFIKRYLAQYPQRPMVRLKPGQTVETELDGDWMKATVEKVDASLALMKFSRTHSEWIYRGSTR…
>Schistosoma_bovis_RTG90069
MRIRMYVALNVSRRNLKRMCDVPPDDVSHHSMCDTMNSLKHEHRLLIDELTEAIYDALDSDDIFNIVFAFVESKYQAELKDVNNPKLRLHIIQQRFSLALEECGLIDEIIESFPELNLNARLDELKKEQSTLQSNILELNGKIDAIVDEMTRLQINSFGRVLRLFDNRVIDLAKDEEEIVVIEKPNNRVLESTINHSSAPVWRTLQPSELLLGLQLTPSQPVLYRKTQHTWFPGRVLSCHLPSSDPSTPKSDKDRAKENENAQYTIALDTSSKSKSEICFAVTSSLALAFSASELKQKYPVGARVVSIYRDDTGGIGYYSGLIAEPPSERNNQRYLLFFDDGYTQYSPPNEIYRICHQSKENWKEATESSQEFIKRYLAQYPQRPMVRLKPGQIVETEL…
>Schistosoma_haematobium_KAF1313906
MRIRMYVALNVARRNLKRMRDVPPDDVSHRSMCDTMNSLKHEHRLLIDELTEAIYDALDSDDIFDIIFAFVESKYQAELKDVNNPKLRLHIIQQRFSLALEECGLIDEIIESFPELNLNARLDELKKEQSTLQSNILELNGKIDAIVDEMTRLQINSFGRVLRLFDNRVIDLAKDEEEIVVIEKPNNRILESTINHSSAPVWRTLQPSELLLGLQLTPSQPVLYRKTQHTWFPGRVLSCHLPSSDPSTPKSDKDRAKENENAQYTIALDTSSKSKSEICFAVTSLLALAFSASELKQKYPVGARVVSIYRDDTGGIGYYSGLIAEPPSERNNQRYLLFFDDGYTQYSPPNEIYRICHQSKENWKEATESSQEFIKRYLAQYPQRPMVRLKPGQIVETEL…
>Sparganum_proliferum_VZI30349
MMGDCGVSPLSTNDTSDRLVEEALRIYDELVSDLAIKENILAQRLSCVLEKDGFIEDIVQSLKNTRLSDELNKLDDAKHALKIEQEDIGRKIEELTKNLIDLQISYDLLLYYFFRAFGRIEIKLDNQITTEKPDEDKDLEIVEPEGDISLYSTKADVNSWRAVQPSELVVGIRGIPGQAVLAKLSDGSWFPGKIAQICQQEDPDGGSPLTLSRSRQTPRTENTVRFLVNIDISPDQPSLTNEINQKKAIVDSSAIALALSAEQLRQKYPVGSRVVSLYRDEVGGIGYYSGLVAEPPSERNSYRYLVFFDDGYAHYSQASEVFRIFRQTKDNWRETAAGSQDFIKRYLAQYPQRPMVRMKLNQTIKTELEGEWLQATVEKIDASLVLMRFSADHVEWIYR…
>Mesocestoides_corti_VDD75615
MAVADITKKIVKSSFDALDDAKVYDHILSYILKKHEFELSCISDPDVRYNIVSQRASAAVEDFGIIEELVNFLNGFGLSDCLKRLEEEKFRLIKKQHELFDQITTLSKDLVSLQLSAFGHEEFKIEIPRRSLPCLPKETLAVGSKMIELNSSRAAQVKSWRSVQPNELTLGLRGSVGQIVLVRLPDGTWCPGTICQILYREEPLSLIDLNQHLNAGGTTLSNERHRSETKSDCNVRFLVNVDISPHRQYRDTVDPTKVAVSFSAENLLQKYPVGARAVALYQDDNGGTAYYSGIIAEPPNERNSYRYLIFFDDGYAYYAQPKCIFRVFAQSKDNWKSFLPDTQDFIKHYLAQYPQTSDSGNNTSCQPVEVDYASVEASLASAHAPRQKKRKSATGRGIS…
>Rodentolepis_nana_VDO04131
MIVPDLSKKIAQVALDTLEQDNVYENVISYVLQKYSIELSMVTDHETRYNIVNDRVGTVLEEIGLIKDLSDIIKNLGLGDRLKELQEEKVTLLEKQTALTVKLNSLTNQLIDLQTSIFGRIEFKVDNLADEEPIKIEAPENLLKEEHGVNPATYVSKSWRQIRPNELLLGIRGYIRQPVFIITDNNVWIKGVVENVIERDEPLSLIDLNRHSSANGPMRISPTERQYSDLRSVSSPLRYLVSNDNDFRETVDSSRLALGLSSEELTQRYPVGARVVARYIDPHGVSDYYSGTIGEPPKLDNEYRYLIFFDDGYAYYAQPGCVFRMFNQSKENWQFVNRNFQEFMKIYLHNFPKRQLLKLNVDQVIRAQLNGNWLQAKVVKVDSSLVMLEYPSGNLEWIY…
>Hymenolepis_microstoma_CDS26933
MIVPDLAKKISQVALDTLEQDNVYENVISYVLHKYSIELSMVTDHETRYNIVNDRVGAVLEEIGLVKDLSDIIKNLGLGDRLKELQEEKATLLEKQTALTVKLNSLTNQLIDLQTSIFGRIEFKVDNLADVEPIKIETPDKLLKEDHVVNPAPYISKSWRQIRPTELLLGIRGYNRQPVFIITDNNVWIKGVVENVIERDEPLSLIDLNRHSSTNGAMRISPTERQHSDSRPASSSLRYLVSTDNDFRETVDSSRLALGLSSEELTQRYPVGARVVARYIDPHGVSDYYSGTIGEPPKLDNEYRYLIFFDDGYAYYAQPSCVFRMFNQSKENWQSVNRNFQEFMKIYLHNFPKRQLLKLNVDQVIRAQLNGNWLQAKVVKVDSSLVMLEYPSGNLEWIY…
>Hymenolepis_diminuta_VDL61258
MIVPDAAKKITQVALDTLEQDNVYENVISYVLQKYSVELSMVTDHETRFNIVNDRVGTVLEEIGLIRELSDIVKNLGLGDRLKQLHEEKVALLEKQTALTNQLNSLTNQLIDLQTSIFGRIEFKVENLVDVEPIEIETPESLLEEELVTNPSSLISKFWRQIRPTELLLGIRGYNGEPVFILTDNNIWIKGVVESVIERDEPLSLIDLNRHASTNGGVRIPSTERQRSDSRPVSSSLRYLVSADNDFRETVDPSRLALGLSSEDLTQRYPVGARVVARYIDPHGVSDYYSGTIGEPPKLDNEYRYLIFFDDGYAYYAQPDCVFRMFNQSKENWQAVNRDFQEFMKKYLHDFPKRQMLKLNVDQVIRTQLNGNWLQAKVVKVDSSLVMLEYPSGNLEWIY…
>Taenia_asiatica_VDK38171
MSVADATKKIIQASLAAFDEANVYDDIISYVIQKHALELSFISDPDVRYNVMNQRAATALEELGVVDDLVNIMKGVGLSDLLSNLQDEKDKLQQKQVELSEQLNALTKDLIDLQISAFGQLEFKVDPSPSNFPLSLKRPVDVALDPFPEPPIAAVIKSWRSVQPNELTLGIRGSVGQVVLVRLSEGVWSLGVITQLLYREEPLSLIDLNQHVNNGGSKISSERYRSDVKSDGNIRYLVNVEHPSQRQFCDVVDQSKVALSLSSEALMQKYPVGARVVALYQDANGVSAYYSGIVGEPPNSYNNYRYLIFFDDGYAYYAQSDCIFRVFAQSKENWRSVNPEIQEFIKRYLAQFPQRPMVKLSMDQTIQAELNGNWLQATVVQVDYSLVLLRFPSGNVEWI…
>Echinococcus_granulosus_XP_024350202
MEFKVDSLQNNFSLPLKRPEDVVPDTSPEPPIAAIIKSWRSVQPNELTLGIRGSVGQVVLVRLSEGVWSLGVITQLLYREEPLSLIDLNQHVNNGGSKISSERYRSDAKSDGNIRYLVNVEYPSQRQFCDVVDQSKLALSLSSEALMQKYPVGARVVALYQDANGVSAYYSGIVGEPPNSYNNYRYLIFFDDGYAYYAQSDCIFRVFAQSKENWKLVNPEIQEFIKRYLAQFPQRPMVKLSVDQTIQAELNGNWLQATVVQVDYSLVLLRFPSGNVEWIYRGSRRLGPLSNKPLFAFWGQPPQTWAIRSPNHLVGEHGSHQKTRKSATGRGAGRKPLVSVASVAHDTDGTVATTIPPSLQEAEETGRVQPYLDSFIQSIRVKPYVDHKCVAGCLKSAIV…
>Echinococcus_multilocularis_CDS35754
MVQQCHYIPCWWSSIHCRGMSTNGGQSVEVDYASVQTHLVGEHGSNQKTRKSATGRGASRKPLPSVASVAHDADGTVTTTIPPSLQEAEETGRVQPYLDSFIQSIRVKPYVDHKCVAGCLKSAIVLDDPSSGHRSESPFDYRGLNPLEIPLRAGWLRMYIKATPAAEGRDVIAYVAPCGRHIRSFSELDHFLHQTGSQLTSDLFCFDKEIKINEEFRCEKAFIRIADLSYGKENVPVPCVNSVDNESPCFIDYIPNRKPVGKVNINEDPDFLVCCDCTDNCRDRTKCACQQLTIEASAFSSTKGMVDTSVGYRYRRLSQFTMGGIYECNSRCKCDRRCQNRVVQQGVWVRTQVFKTNRKGWGIRALNAIPKGAFICTYAGAIYDDTKAIEEGYDNGDEY…
>Dendronephthya_gigantea_XP_028404794
MVSRSVGIKLTEVKNIIDIEFEKARSGDKLNLLTSTFVNRVEDISAKQQELKGFLESLEVQIKNLGIPQTERRSTDVSILSVHERFPASRNPPCDYEKTPSNTAKNNDVNIQIGAGKDTPIVIDDEDDPKQIVDEPEEPVTPIKDTVEPVEILEEPGQEISQQEPSSSPIIHEESPTIEPKNDTSAVCEETPDISTETGPELSSETTPGEVVLTGPSSSSVPAASVPESDVSTETASSPCTDGSQSSVAEDSQKSEAENVHSQEKSSQEPSTSTNESQLRELERKLEVPVSKDKDVKPTARPHSPSDFTIGTRVLGKRSSDIWFPGQIIKTLKDRTGQVKYSVKYDKGPKGVLSLNHICPEEPGAMCDISVGSRVVALYGNLNIWYAGIIAEMACHGNK…
>Nematostella_vectensis_XP_032231029
MGEIGTMMAGLEEEGLDLESLIDQEFQTAGFVELCARPVSSLDRKAESIAESQGQIKTLLQNLEKQLKQLQEEDACDLSIIEAPDDNEIGDDKEVILIEDDDSEDLKPPNSNARGTPVSPPNPTPPISSSLSSLPSERQQSQDPSRGDSPSTSVKQMVPNTQASRLCLQTTSASSNLPVTTQQSFRMTFTPPSMIPKPITTPNDPTVIQTISTTLTNLSGTTASDKSTAISTHPLFAVNEVKTPGQTTGPAQATTEESRVRSHPAPAPSQTSASASAPLLPPPSPPPPAVTSQEPRRSPSPPKFVEGTRIIGKRSDDLWYPGEIMKVVTDRHQQVKFKVKFDKGTRGLLTSKHIALVAHPHASILCVGSRIVGPYGKLDVLYAGIVAEIACQENKNRFL…
>Orbicella_faveolata_XP_020605038
MGEIGIMVSRLQHEGFDLEDMIDEELRAAGFLELCERTTRTLLQRAVAVEESHSSLRRLLDSIDTQLKELQGTLQTPRVLEKDVGDTPRVGQDQQEKQQQQQQPQPQPQPATVIVIDDDEAEFVNVADMSCQATFEDIESETRDREKEKTLNRNQNSSSTPKQQTEQSDILKSYVPIRPAPVKESINNSVVLQTPTSSVLQQTISKQSEVVVSPVTSAGKTPPVIYRTLKSPVESGLPLLPQRVALNSSPPSLPVQQEISSLKSSSAAASSLVSPGDNKSSTTPSVTQPSPVQTPTTQAGPSSADRKDTIEKEKSPPAGPPKFEVGTRVIGQRADELWYPGVIEKILTDKNSHKTKFKVKFEKGTRGLLSSNHISLESNPNPAVLNVGSRVVGIYGKLD…
>Actinia_tenebrosa_XP_031550964
MVFLKTNQWVKTEWRGKWLKAKVMQVDCSLVKMLFQVDNRSEWIYRGSTRLEPLYKALVDGKISNSKKNKRQRKAPQNSDEPYVDMRLTSPHFGFSLYSKTDPKGKKQEESERNRNQTVKQVVQGAQGSTRSSSGGQSLSQTSSQVEQNTSRESDTTANKASRTSTNNTTLSTRDTTRPSREPGIKLSTSKHTIGTNTSSITPSITPLSNTTTHKTIGTNTNRSTAPRTILPSNQGIHMPTDTKRMAILRNILPSNQGMTNMTGKATMSLTRANNSCSVPDSTVSIGWSNSPXINHTLDDSTASIIQASTMRKRTXAGLITKNNFNHVGANVVTFGADSTGVMTSKMVNNGAVSVMSPVMNKLKWEAPWKQRLSNVNIIKESLHKAVLSNSKHDAAALI…
>Exaiptasia_pallida_XP_028514626
MRMIHVEMKEIIHSINNYCIIFHCHVPILSNNRASNNTAPKFDEGTRIIGKRSDDLWYPGQIIKVITDRYNQNKFRVKFDQGNRGLLRSNHVALETSAPRDVLNIGSRVVALRPRETGDESASWRQAQEGPYGKLDVLYAGIVAEKCCPETRNRFLIFFDDGFAQYLPLQKLHHVCNTGDKVWNEVAEHSQEFIQEYLEEFPNRPMVVLKVNQWVKTEWRGKWLKAKVLQVDCSLVKMLFQVDNRTEWIYRGSTRLEPLFKALIDGKISKKKSSKRPKKQSQAPDEPYVDFSVTNPAFGYSPYSKTDSKGPQQQPQQKDTTSAGQPSSSTQTETSQPSSSKTQEKPTSTATTSTTTTTQTTTTQIPLXPTSKSSTQQPSNSVSSNQTSATSTTPSLAPS…
>Hydra_vulgaris_XP_012556979
MDPNIESELLNAISDDFLIKQYKDIVDQQIEAQGFPKLCKRAITKEVKEAVQKINNDHIEIKKLIQDVSQRYQLYSSNKKTRKKEDNVQVKSSSNCSNNIVIVIDDDDDDESNYVPKTSTTTSSILLLNNNSSTLSVTTTSTCFVIQPPTHTLPQLTSDAPTYISLLSPPPLAVNEELSKTENYSEECLNNGPSLEHINCAETPSTNISKNIAENIVTTLCNSTACSYAEIAKDTENNNKHCTNEQNKIENQIIDKEFELIKSSECSQAKDANLNNNKTDLHINEHENNFLDKEENQDSSVVSRELLEEEKNVSNKTLIVSNGEKASKNSFSFQFHKKTDFESVPSSPLSSSTSSEFGKSTISADSPASNALCVDIENYSSERSAPSSQDMHSSPDSQS…
>Acropora_millepora_XP_029210696
MGEIGIMVSRLQHEGYGLEDLIDEELRAAGFLELCERNTRSLFQRAVAIEESQSSLRRLLDSIDQQIKHYQESQIRKDDRDTGKQDPKKTPVIVIEDDEVEYVDVADMSCQATSKDIENETGLQAAKEKETLQNASERGNTSTQPQHSFQSNTSKGTVSVPLTSSASVSMPRKNTTPALTISKTLSSVTKPSESVSKSLPTRLDTVPKPKQTTSKPADVAHSFVTTSTTTPPVIYRTLKSPVISGAPLLPQRVALKSSPPSLPVQQSFTAAVKSSLGNGIPVVSPTDVRASAESFTVSQSSKLPQAECSSSDKHITDQEKSFIAEPPNFEVGTRVIGQRADELWYPGVIEKIMTDKTLQKKTKYKVKFDKGSRGLLSSNHIALESYPHPSVLNVGSRVV…
>Pocillopora_damicornis_XP_027037868
MGEIGIMVSRLQQEGLDLEDMIDEELRAAGFLELCERTTRTLLQRAVAVEESHSTLRRLLDSIDAQLKEYQGTLPTVRTSEKEAPRTTLGSKDQQDQQQQQQQQQQQQKSATVIVIDDDETEYVDVADMSCQATDEDIKNETREREKEREKEREKEKEREKEKETKKEKEKEKEKEKEKDKAETVNLNQNLSVPPWQQTAQTNILQNYVPIRPAPPKEVVNTFTSSQTGTMSLTVQRTKQSDVSISPLSPIKSPPPIYKTLKPPVGSGEPFLPERVAVMSSPPSLPVQQTLPNLELQTGTPPLTSPVNSRPSTTPSVPQLPLRQASLPQPGPSSLGKKESIDKEVKSPPAGPPKFEVGTRVIGQRADELWYPGIIERILTDKHNQIKYKVKFDKGTRGV…
>Stylophora_pistillata_PFX23682
MGEIGIMVSRLQQEGLDLEDMIDEELRAAGFLELCERTTRTLLQRAVAVEESHSTLRRLLDSIDVQLKEYEGTLPTIRTSEKEAPRTPLGNKDQQDQQQQKSATVIVIDDDETEYVDVADISCQATDEDIQNETGEREKEREREREKEREKEREKEREKEREMEREKEREKEREKEREKEKEKEKEKEKEKEKGKDKAETANQNQNVSVPPRQQTAATKFLPNYVPIRPAPPKEIVHTFTSTQTGTLSLTLQRTKQPDVTISPVASIGKSPPPIYKTLKPPVGSGEPYLPERVTVMSSPPSLPVQQPVPSLELETQTPHVMSPVNSRPSTTPTVPQLPPRQTSLPQPGPSSLGEKESIKKEIKSSPTGPPKFEVGTRVIGQRADELWYPGVIEKILTDK…

## Sheet: Data_S3
Supplementary Data File 3. MBD- and SET-domain containing proteins in A. vaga Av-ref, with scaffold numbers from Genbank and protein IDs from Genoscope (.fasta format).
#SETDB1_7_allelic_pairs
>Av_s314_GSADVT00048405001
MMTTLENLQDGNLSSSVFDSPCPSVASDKQDVVIVVDEDESDIEIDEESTIHINEKYQQCAAKYLINKLDLHAEIIIVKPNLPVRVCRTAIPYTNLRDVQIITIDNPQTSKPEHVTKRQIYMNEPCSSTTIPIRSRVFHRATSLLGFVLELPCITTNNNRYLVLYDDFTACYHSYGELHLCLCQDFRRHLLNIDYKDLRDYYQQAFKNLNKSMQITYSLDSIIRVKKFGAQYHNVRVIEVDYSLLKTCFFERKSKKEIWIYCNSSIIERTQPIIELPIVTVSENPPTPTDETIEPCADLPRLRKRQNDDNNNNSNKKDRKKLRDRSNTKQPILSSNDDLSSATRHNIVTAYYTNVLFPKFRVLNTLPSTVHKCGRQCVISAEETFCPSKIRTNPFLLPF…
>Av_s472_GSADVT00056990001
MMTTLENLQDGNLSSSVFDSPCPSVASDKQDVVIVVDEDESDIEIDEESTIHINEKYQQCAAKYLINKLDLHAEIIIVKPNLPVRVCRTAIPYTNLRDVQIITIDNPQTSKPEHVTKRQIYMNEPCSSTTIPIRSRVFHRATSLLGFVLELPCITTNNNRYLVLYDDFTACYHSYGELHLCLCQDFRRHLLNIDYKDLRDYYQQAFKNLNKSMQITYSLDSIIRVKKFGAQYHNVRVIEVDYSLLKTCFFERKSKKEIWIYCNSSIIERTQPIIELPIVTVSENPPTPTDETIEPCADLPRLRKRQNDDNNNNNNKKDRKKLRDRSNTKQSNLSPNDDLSSATRHNIVTAYYTNVLFPKFRVLNTLPSTVHKCGRRCVISAEETFCPSKIRTNPFLLPF…
>Av_s283b_GSADVT00045851001
MFNIRRSTSSFVLSEKQSDTLIVIDDDNDTDSDIEIDGAIADFNQHDKEDLVLLKTFIPKLDIETELIHITPNQSLRICTAALFYSNLPETHIIVINHTLNSSPECAPKRHLYINNTNPILSIPSRARIYSRCSSLLGFIYEKPCSMKNANRYLVLYDNFTASYQLSTTFHLCLCQDFDKHLLNIDYSDLQTYYRNAFRYRHLSKQLNFSIGMIIRVKKFDGQYHNARIIEKDYSLIKICFYERKSQTEIWIHCNASIIDDSQELSLSKKLRISSSLSSSQSQHSITDLIISNTDLSRLRKRKTNVNHIDEGKKKLRDRLNTKQLSIPQRQSSSSSDETHSASRANMLTVYYTDILLPKFRLLNNIPYVPHKCDSQCVLVAEESFHPNQLHINPFLLPF…
>Av_s19b_GSADVT00005938001
MFNIRRSTSSFVLSEKQSDTLIVIDDDNDTDSDIEIDGAITDFNQHDKEDLGLLKRFIPKLDIETELIHITPNQSLRICTAALFYSNLPETHIIVINHTLNSSPECAPKRHLYINNTNPILSIPSRARIYSRCSSLLGFIYEKPCSMKNANRYLVLYDNFTASYQLSTTFHLCLCQDFDKHLLNIDYSDLQTYYRNAFRYRHLSKQLNFSIGMIIRVKKFDGQYHNARIIEKDYSLIKICFYERKSQTQIWIHCNASIIDDSQELSLSKKLRISSSLSSSQSQHSITDLIISNTDLSRLRKRKTNVNHIDEGKKKLRDRLNTKQLSIPQRQSSSSSDETHSASRANMLTAYYTDILLPKFRLLNNIPYVPHKCDSQCVLVAEESFHPNQLHINPFLLPF…
>Av_s19a_SNAPT00006996001
MPSTRTTYESNKKNKENFTNLSKDAIIIDDDNESSHSDCLIIESNTSTSTLSDTNTSLSLLGILPNTLEKQTNLLLIYENRIMDVHLIASVFNLEQQQNITISHLNYFYSIPKRHLYLSIHCNIEHVSMPHQCRVMYTSFMKTKFSLGFIDESPSIYNHSRHLILLDDGTAVYTTNNDRIHLCLCQDFERNSRSIESKSIRKDLEEILFHQKLNKKRYQLHDYVRVKKFDENYHHAQIIEIDCSIMKLKFYERQAQTEIWMHQQSILIDDIIMSPVELASPMILQPKQTSNEIVSCKRENFVKTEIILASLSSTSLIQSFCSNVYQPHQCSPYCVLTIEENFNPNQILQNPYTLPFSYGWRYLYIDRYAKGYYSKKPSTHKTVSRVNYLYRSPCGRSLL…
>Av_s1054_s283a_GSADVT00045850001
MPSTRTTYESNKKNKDNFTNLSKDAIIIDDDNESSHSDCLIIESNTPTSTLSDTNTSLSLLGILPNTLEKQTNLLLIYENRIMDVHLIASVFNLEQQQNITISHLNYFYSIPKRHLYLSIHCNIEHVSMPHQCRVMYTSFMKTKFSLGFIDESPSIYNHSRHLILLDDGTAVYTTNNDRIHLCLCQDFERNSRSIESKSIRKDLEEILFHQKLNKKRYQLHDYVRVKKFDENYHHAQIIEIDCSIMKLKFYERQAQTEIWMHQQSILIDDIIMSPVELASPMILQHKQTSNEIISCKRENFVKTEIILASLSSTSLIQSFYSNVYQPHQCSPYCVLTIEENFNPNQIIQNPYTLPFSYGWRYLYIDRYAKGYYSKKPSTHKTISRVNYLYRSPCGRSLL…
>Av_s90_GSADVT00019850001
MDVDSVLKPLDDEQKYLQQLRQSSTVEPILLHLFNLLEIEDYRVLFYSINLRTVDCQWLQTFGKLCLKRYFELDDMSFFKTSQFTSFNKNDTKSILENYTNFLIENLKQRFTINYFRAIMFEIEELNRFKFDQVSKQLNENNHIINELFLLFNHEIDEKDDSIIHLSSTPAPPIHRPIYINYKPIHMVYLRENLLIKNDLDTRLPLKGITNAFVADLINTKHINILDEVTGKTHDIPTKWLYFSKPCENNVILPLKLRVLIIDSQTGRRRYGLIGEEPGKNNDYRCLVFFTDDSTNMSANYHPSSHIHICLDQTFSIHTQECKNEFLDRYFASYPERMMLRAKEGSIVKVRNIFTNFHNNSFVPALVIQIDGSMMQIELSHSKQRKWLYRGSPLLDQMH…
>Av_s95_GSADVT00020652001
MDVDSVLKPLDDEQKYLQQLRQSSTVEPILLHLFNLLEIEDYRVLFYSINLRTVDCQWLQTFGKLCLKRYFELDDMSFFKTSHFTSFNKNDTKSILENYTNFLIENLKQRFTINYFRAIMFEIEELNRFKFDQVSKQLNENNHIINELFLLFNHEIDEKDDSIIHLSSTPAPPIHRPIYINYKPIHMVYLRENLLIKNDLDTRLPLKGITNAFVADLINTKHINILDEVTGKTHDIPTKWLYFSKPCENNVILPLKLRVLIIDSQTGRRRYGLIGEEPGKNNDYRCLVFFTDDSTNMSANYHPSSHIHICLDQTFSIHTQECKNEFLDRYFASYPERMMLRAKEGSIVKVRNIFTNFHNNSFVPALVIQIDGSMMQIELSHSKQRKWLYRGSPLLDQMH…
>Av_s135_SNAPT00031670001
MDIENVLRPFDDERLYLRKLRQSSTVEPILLRLFDLLKPDDYRLLFSTINRQKLDYKWLETFSKLCMQRYLEMDDVFFSDKLLSNSIRSESHSKSILENYTNYLIENFKNCFTIQYFRAIIYELEQLNHFKIEQISKQLNENNDIIQKLFLLFNNNPQFSDDSIIHLSSTPAQPIHVNYKAIHMIFLSTPVCIQNHHDLRLPAIGITNTFIADLVNTKKVDILDELTKKTYEIPTNYLYFGKACEKNIILPLKLRVMIVDHQTKQRRYGIIGEEPGKNNNYRCLIFFTEDNENISASYHLSSEIHICLDQIFECENNFLNSYFKSYPERLMLRAKEGTTVKIRNFNSNNRNAFLQATVIQIDCSMMLIEVNNTKQRSWIYRGSTLIEQMNNYYITQNKV…
>Av_s293_GSADVT00046546001
MDIENVLRPFDDERLYLRKLRQSSTVEPILLRLFDLLKPDDYRLLFSTINRQKLDYKWLETFSKLCMQRYLEMDDVFFSDKLLSNSIRSESHSKSILENYTNYLIENFKNCFTIQYFRAIIYELEQLNHFKIEQISKQLNENNDIIQKLFLLFNNNPQFSDDSIIHLSSTPAQPIHVNYKAIHMIFLSTPVCIQNHHDLRLPAIGITNTFIADLMNTKKVDILDELTKKTYEIPTNCLYFGKACEKNIILPLKLRVMIVDHQTKQRRYGIIGEEPGKNNNYRCLIFFTEDNENISASYHLSSEIHICLDQTFECENNFLNSYFKSYPERLMLRAKEGTTVKIRNFNSNNRNAFLQATVIQIDCSMMLIEVNNTKQRLWIYRGSTLIEQMNNYYITQNKV…
>Av_s150_GSADVT00032172001
MPLAIDVGQRVLVYNPSHGWTMAYFVRAQQTNDNKLQILTCRLSNCHHKPTSQDHYRYPPERVALNDSINEQVNVGTRVLCMPSGDADTSRYIDKPLRGIIAEQPANDNDQRYLIFADSDSPFYLRSTAIRLLLEPLSNYLSKVDLGTKQYIENYVLTYPKRRLVNISVKDHINIELNGQWIDAIVSKVDASLMRVFLPVLNKHEWLYRGSLRLQPLFNSLSTYEPPCKRFASEKSLTINHNNKCHFLLIPLNYGWKRQIRNDLGTIVYISPCGQMFTDGERLHAFLYQTESLLSIRQFTFDMNCRVTQKFISPNTAFVNLEDYTSGKDNVPLMLVNEIDSTLPKSFEYITERIPYTSDISIDKDNIKGCSCTDGCIDTTKCACWQKTYDGIIRSHYYE…
>Av_s127_GSADVT00029417001
MPLAIDVGQRVLVYNPSHGWTMAYFVRAQQTNDDKLQILTCRLSNCHHKPTSQDHYRYPPERVALNDSINEQVNVGTRVLCMPSGDADTSRYIDKPLRGIIAEQPANDNDQRYLIFADSDSPFYLRSTAIRLLLEPLSNYLSKVDLGTKQYIENYVLTYPKRRLVNISVKDHINIELNGQWIDAIVSKVDASLMRVFLPVLNKHEWLYRGSLRLQPLFNSLSTYEPPCKRFASEKSLTINHNNKCHFLLIPLNYGWKRQIRNDLGTIVYISPCGQMFTDGERLHAFLYQTESLLSIRQFTFDMNCRVTQKFISPNTAFVNLEDYTSGKDNVPLMLVNEIDSTLPKSFEYITERIPYTSDIIIDKDNIKGCSCTDGCIDTTKCACWQKTYDGIIRSHYYE…
>Av_s8_GSADVT00002741001
MPVAIDVGQRVLVYNPSHGWTLAYFVTAQQTNDNKLQILTCRLSNCHHKATSQDHYRYPPERVALNDTVANNLNIGIRVLCMPSGDADTSRYIDKPLRGIVAEQPSSINNQRYLIFADNDSPFYLRSIAIHLLLESLSNYLSKVDLGTKHYIENYVLTYPKRRLVNVSAKDHINIELNGQWVDAIISKVEGSLIRVFIPFLNKHEWLYRGSLRLQPLFNSLSSYEPPCKRLAIEKDIKIDNKCHFLLIPLNQGWKRQIRNDLGTIVYISPCGQMFTDADRLQSHLFQMNSILNIRQFSFDMNCRVTQKFILSKPSLIQIDDYSSEREKVPLMLVNELDSTLPKTFEYITDRIPLTADITIDTSTIQGCSCTDGCLDPTKCACWKRTYDALIESHYYEDV…
>Av_s176_GSADVT00035214001
MPVAIDVGQRVLVYNPSHGWTLAYFVTAQQTNDNKLQILTCRLSNCHHKATSQDHYRYPPERVALNDTVANNLNIGIRVLCMPSGDADTSRYIDKPLRGIVAEQPSSINNQRYLIFADNDSPFYLRSIAIHLLLESLSNYLSKVDLGTKHYIENYVLTYPKRRLVNVSAKDHINIELNGQWVDAIISKVEGSLIRVFIPFLNKHEWLYRGSLRLQPLFNSLSSYEPPCKRLAIEKDMKIDNKCHFLLIPLNQGWKRQIRNDLGTIVYISPCGQMFTDADRLQSHLFQMNSILNIRQFSFDMNCRVTQKFILSKPSLIQIDDYSSEREKVPLMLVNELDSTLPKTFEYITDRIPLTADITIDTSTIQGCSCTDGCLDPTKCACWKRTYDALIESHYYEDV…
>Didymodactylos_carnosus_Dcar706_s11330_s314-like
YQRKRLLNPISSGLYECNSKCSCHHDFCSNRLVQQGLFVQLQLFKDKSKG*GLRTLHDLPCGTLIYEYIIKLLTSDQGHERAQTMDDKYQTSLDLVKQVRYEINNEDGNEVDGVDEPYVIDGSLYSNLGKYFNHSCDPNIFIQNVFIESHDLHFPNLA*FTRTHVKANQG
#BAZ2A_2_allelic_pairs
>Av_s8_GSADVT00002651001
MSNTSKEPMTKKQQDDLNSSFNNLPWGLPLGFPSLSPFGAFPGYGMPTPNFPSLNSFASSTTTAFPPSLLSNDSTTNPSTASTDVWTNGLSSANNAMDYNEYIKQLGFLMNAFTEQQKPPETDKSKASPSTKHSKPKSSHTPSASSSPDVHNSKKHDDSRRSSSSNKSSSRSKSSSKQQPSLSSTPTHVSSTKTSTNNDSSMLDPVAFAAAMAGGGLSFPYFLPSLLSQTPSTATTGTNNNPSTYPFSALSSSLANPTAGLYPFLSPDWFTSPAALGNITPDSKQSKKRSKSIRTLTEEQDKNASSLLHSALSDPTNTNGLRLSRRSSTNETPIDDSRSNDDDDSDPNPKRKKTEEVNEALVRIPLNRGWKRITIVRAITRTGVRGDVSYYAPCGRKLR…
>Av_s413_GSADVT00054273001
MVNIFLNIFDSLEKSLYVLDDSDPNPKRKKTEEVNEALVRIPLNRGWKRITIVRAITRTGVRGDVSYYAPCGRKLRSFQEIDRYLSKKNITDLDRSHFTFSSKVHIGFFHEPKEGPDGKTIFEESTEDEIVNRILEINPKFRRIETSSSPCMTPKLSKRAAEIKNKRDPMRYMRNVTSESPKTSDTQYQHNEFIKAIIEQQKFAQQQELEHQQKIQQEQQKNLYNSNNVKQKRMHNVKRKSYVLLNLMMILSSHVDFFLIFQQEKYMEIVLAKEAKRIAEDMQLRDLKSFPTLKSVENRRLSIEGFANCLMIIEFLNNYKHILNIPDNLIPTLNSLQQSLISSSSSRDLNSLFQILLRIALEDPGIPNPKKALTDLGQKLSEIDITEHTFGEILRIYIR…
>Av_s76_GSADVT00017686001
MKSSDVIGSSSLTSIDSLFKPILFDQQQSDLWTFKPIKDTKIDDVRFHCRLYSIACDCYDSDPNPKRKKTDEVNEALVRIPLSRGWKRVTIVRAITRTGVRGDVSYYAPCGRKLRSFQEIDRYLSKKNITDLDRSHFTFSSKVHIGHFHEPKEGPDGKTIFHESTEDEIVNRILEINPKFRRIKFDYEGDTPTRTSTVSSPSVTPSQNNGTNDHHQQKHEDNRKFRLEQEEVAKRATEIKSKRETMRLLQNITGDSSKISEHLTNNHYQHADFLKVFMEQQKLLQQQELEHKQRLQQEQQEQERKRQELAYLKQLELKKRQEEKLLQIEQRKAEKNAEREKKIQEKYIEIVQAKEMKRIAEDMQLRNLKTLPILKPVDTMRLSIEAFANSLMIIQFLNN…
>Av_s245_GSADVT00042866001
MYNLYVFSSHRDSYLLYYRWKRVTIVRAITRTGVRGDVSYYAPCGRKLRSFQEIDRYLSKKNITDLDRSHFTFSSKVHIGHFHEPKEGPDGKTIFHESTEDEIVNRILEINPKFRRIKFDYEGDTPTRTSTVSSPSVTPSQHNGTNDHHQQKHEENRKFRLEQEEMAKRATEIKSKRETMRLLQNITGDSSKISEHLTNSHYQHADFLKVFMEQQKLLQQQELEHKQRLQQEQQEQERKRQELAYLKQLELKKRQEEKLLQIEQRKAEKNAEREQKIVNIQEKYIEIVQAKEMKRIAEDMQLRNLKTLPILKPVDTMRLSIEAFANSLMIIQFLNNFKHILQIPENLIPTLNTFQQSLSSRDINSLCQILLNIALEDPGIPNPKKSLTILGQKLSEIDI…
#EZH/E(z)_4_allelic_pairs
>Av_s184_GSADVT00036040001
MTTDPVKNKSSVDPIWRDRIERALKHICRTVDIRQRRDAVPLFSTIAEQYKDLRRPMIISEPKSVEKRFTLYTNCSYDELTGEKSTCPLSILPQIDKIPHMFTYVPLQRNFLCDTMTNLSDLVLEEEDEDIKNLLSSVESDSSILPSTKDARSSSSSSTSKRIRRCSKTAAINDKDNEYVFDEEHLLELLKRLKQQPGHASVPMTADDDSNLMETLLKLYPLSADLIRDRFGTIFISKRLPPKEFTPNIDNSSLALDTTVDNTLHSYFMLFCRRCHRYDCFLHKDKQATPDLTIEPKNSNAVYCPCSHHCYRMNSVSSRRTKLELKRSFSDIVDHKTFKPPLNDSNGFTNGFHFKPSLKRKLTDEVSEWSPSDKSLFRVFHTIYGNNICMIANLLDKPC…
>Av_s41_GSADVT00011089001
MTTDAVKNKSSVDPIWRDRIERALKHICRTVDIRQRRDAVPLFSTIAEQYKDLRRPMIISEPKSVEKRFTLYTNCAYDEITGEKSTCPLSILPQIDKIPHMFTYVPLQRNFLCDTMTNLSDLVLEEEDEDIKNLLSSVESDSSILPSTKDARSSSSSSTSKRIRRCSKTAAINDKDNEYVFDEEHLLELLKRLKQQPGHASVPMTADDDSNLMETLLKLYPLSADLIRDRFGTIFVSKRLPPKEFTPNIDNSSLALDTTVDNTLHSYFMLFCRRCHRYDCFLHKDKQATPDLTIEPKNSNAVYCPCSHHCYRMNSVSLRRTKLELKRSFSDIVDHKTFKPPLNGFHSKRPKLNTVKTEPFSPDSNGFTNGFHLKPSLKRKLTDEVSEWSPSDKSLFRVF…
>Av_s13_GSADVT00004344001
MSTAVVDYDSIVDSIWKDRIERALKYVCRAIDLRQRCDAVPLLAKIADHYNHIRRPRILSEFNSDQNKTSLYTNCSFNELTGDKMICSLSILPQIDQLPNLFTYVSLQSNFLYDTITNLSDLVFDENDEDVKNLLISIQSDSFTEQQQSIRLFSSMKRTNRSSKISFLNDRNHEFIFDEEHLLELLKRLKQQSEHTSSPITSEDESNLFDTLIKFYPSSADLIRDRFGTVFESKRLPPKEFTPNIDNKSLALDTTIENTLHSYFMLFCRRCHRYDCFLHKDKPVTPNLNQLTKNSNNNSRPCNPQCYQRNSKSSYQQRRTKLELKRSYSELFDNTISKSSTNGFHSKRPKSNMIKTEEISSTYDFNFSPNASDKSLFRIFYKIFGNNICMIADLIDKPC…
>Av_s38_GSADVT00010460001
MKRTNRSSKISFLNDRNHEFIFDEEHLLELLKRLKQQSEHTSSPITSEDESNLFDTLIKFYPSSADLIRDRFGTVFESKRLPPKEFTPNIDNKSLALDTTIENTLHSYFMLFCRRCHRYDCFLHKDKPVTPNLNQLTKNSNNNSRPCNPQCYQRNYKSSYQQRRTKLELKRSYKISSTYDFNFSPNGLLFKPSLKRKFTDELSNWFASDKSLFRIFYKIFGNNICMIADLIDKPCSQVYTFYLNEIETKEKKLFLQKQLLSIGPLLDMAPSDSIEMKINGTLIGESIEDEIKMCNGNDNEQSPNGIRPTGNHCSTSRRSHSSLFRRQRSHQHILLTHHNNQLQEQKRHTYYPCDHDRSLPCNEDCYCVRSGNFCEKFCCCASTKCDNRFPGCRCRSSCT…
>Av_s64_GSADVT00015606001
MREKKRSQEYVQRSLSVDKEEEENVLRQAVEHEYTTLYRQVHKGAQETARHILRHVIQPPAPQALTISIPTSTNELNNDKDDNNTTISVTVADGCNKNPHKNSTIPTIMPTLPIVRELISYVPTMRNVATRGHLIGIPYLGDKFDAEDQRLINSISIEPTKQQKLIRKKKLDEQSLETVYKSLRSNHLWTNYSNEQIIDAILHYHRDSTPRANLLKLANQNDCPLVEKQRYHTNIDEYIALDVDIDELIIKPWCSRFCPRCYTYNCLLHKEGPSYLPLPKKFSLSLDNQSEPCSATCYKHQREQLKRPLSPSSACSNESITSIDNNNKKRQRRNSNIMLIISDENLTHEHPLDVNVRQIDVQKRLSTQCLTRIENQMNCQTMPLMPLDNNWTLTDRSIF…
>Av_s2893_SNAPT00084028001
SLRSNHLWTNYSNEQIIDAILHYHRDLTPRANLLKLANQNDCPLVEKQRYHTNIDEYIALDVDIDELIIKPWCSRFCPRCYTYNCLLHKEGPSYLPLPKKFSLSLDNQSEPCSATCYKHQREQLKRPLSPSSACSNESITSIDNNNKKRQRRNSNIMLIISDENLIHEHPLDLNVRQIDVQKRLSTQCLTRIENQMDCQTMPLMPLDNNWTLTDRSIFRLFYFXXXXXXXXXXXXXXXXXXXXXXXXXXXXXXXXXXXXXXXXXXXXXXXXXXXXXXXXXXXXXXXLLYIKRTLNRPNENHHQKNTATTLKPSYQPCSHDGPCTIDNPQCCCMKMGTFCEKFCNCSIDCPHRFPGCACRGSCLFNSCLCSAEGRECDPDLCHNCGASLFFDELNASIKL…
>Av_s1_SNAPT00000394001
MRELRKSTNLSQQLLLNDKKSDVLQQVVNHEYNKLFRQTKKTSDEIVQHILQRVATYPPPSPLIIPNPKSTKVFDTNDDDDDHDNTIQQISVMITDGADKKLQKSSINVTVMPTVSSVRELIAYVPTMKNIATRGDLIGIPYLGDKFDAEDQKLINSISGESENKTKRPMRRKKLDEQSLEILYHTIRSNETWHSYSNVQIIDAILHHHRDSTSRSRLLTIASQKECPTNSNDSYSVNIDTCDTVDLDIDDLCIKPWCSRFCTRCYTYNCLLHKDIPCYLPLSNQYCLSVNDQSSPCSSTCYKHEREKLKRSLSPSYTNEEQNQSYHSTQPERTENVRKRPRKSAPVRRILSSNKLNHFHNENFRIDHYHLHVLDIQKKVTSQQLLTRIENHMIQQSNL…
>Av_s769_GSADVT00065579001
MRELRKSTNLSQQLLLNDKKSDVLQQVVNHEYNKLFRQTQKTSDETVQHILQRVATYPPPSPLIIPIPKSTKVFDTNDDDNDHDNTIQQISVMITDGADKKLQKSSINVTVMPTVSSVRELIAYVPTMKNIATRGDLIGIPYLGDKFDAEDQKLINSISGESENKTKRPMRRKKLDEQSLEILYHTIRSNETWHSYSNEQIIDAILHHHRDSTSRSRLLTIASQKECPTNSNDSYSVNIDTCDTVDLDIDDLCIKPWCSRFCTRCYTYNCLLHKDIPCYLPLPNQYCLSVNNQSSPCSSTCYKHEREKLKRSLSPSYTNEEQNQSYHATQPERTENVRKRPRKSAPVRRILSSNKLNHFHNENFRIDHYHLHVLDIQKKVTSQQLLTRIENHMIQQSNL…
#MLL/Trx_2_allelic_pairs
>Av_s140_GSADVT00031097001
MNDSVSSVPPPPPTKLDIKTDNVYTIDGSTTQHMRSVTAIGNNVTIINTPRTPTDARLYHSPMIRTTSVDNSNNPSKSMTIVVQNPFDDPVRHIEDPSNDPSGANKYLLHSPSPSKQHSITNVQSPRTISRTPTPGTPHQLSDDVSMSSPSMPGNLQRHSSQQVRLPQAPNNGTMTNMPTARNIVPQQPLQQQQQQQQQQSQPQQQQPQQIQAGPHHVRFNQDLLNNYGINVPMTRQPSQPGANETPQSPPNSTSITSLIPLPSPLPNNLGVNMHHMNQASITPTILGGYSIHQSSPQANNTNNNFISPQQMNVQNKLDNPHIIASHGSHHQLSSTPHHPPTGIYVNTRPMISSPVTTVTGIGKVKQQTSLQPQQSIRPGMPTNGIPSGPSAVVLRYPH…
>Av_s449_GSADVT00055959001
MLTPLEPSIDINNELSLSLPIDLSEKKYQYQGDFGHVFIENINDYYRPQRRPPPKPVSLTIPTNPLSALERRYRICSTLLDHPPSLPSPPLAMDSNDKLSKLLVKEENNDIRDDESIISTSTLADDDNILNNIETENSQLLKTLSSTHDYRSLSPVLISNEISTTKNRTSTYKSGRETSVSIQSLIEMQPKHCRNCTQRLTSDNLFKKRLTELPSSVRELIPNSEPFIYFCNEQCFNTCLSNTHNQQQALTVNTSINSSPTIKNESMDTTSPPCTPNDLNGSPNGRPRRLSLKRRHETLNKSNGDKRWKDIRWKRWDPSMTLKTVIRPSNTNEIDQLITEMKIPLSANAQQDKRICAFCSGVGDLTTNGPGRLLNLDVGQWCHLNCALWSTEVYETVSG…
>Av_s106_GSADVT00026654001
MKRWKRWSPNLLPETIVQPSNDTDIEQLIAVTKIPLASNAAQDKRVCVFCNGIGDMLSNGPGRLLNLNVGQWCHLNCAFWSSEVYETLSGSLMSVEQAYTRSRNTECVVCKQKGSSLNCFYQRCSNTYHLYCATDNGCVFYKDKTMMCPTHASKTVSIDQILEDKAILRRIWIERDEIKQIQNYMTDEHEDKSYILRIGSLILHNVGQLLPHQIQASAFYNRSYIYPVGYTATRFHWSLHHPNRRCAYLCSIIDIDNKPMFRITVHEDDQIEEFLDSSAKRVWHKIIREIDLLRRKHNLVKMFPVFVSGEDLFGLTEPHITRLIESLPGVEMLPNYAFKYGRLQLFDMPLTVNPTGCARSEPKLQTHFRRHAQTLTSSHAARIVLPRSLLGTETSQVPY…
>Av_s264_GSADVT00044454001
MTSTGIHSNNPRFVLGKVNPYNGTIPNHLRYPATIQPQQYRHPMMKQRMTSANTYGTMIPPPAPPPSQQQPQQQPPIIYDPNTLYRTNGQQQQPHDHLPPDNNILKSLLQPSETEVKAHPSVNGHNLSFPPIPKPRKKRKGNDPNTLCEDDIPAKLQKRKKKGAKEAEKFVEYSLQQLRNLPMLTPVEPLIDLSKELPLSMNFSNIKKHQYQGEFGDIFIDDMNDYYRSYRRAPPKPIINPLSSLERRYRLCSNLLDRPPCLPSPPLQIDSSDKLSELMKQNSNFQDDESIISTSTMAENEDLINDIQTENLQLLKSLSTSDDHDYRPLSPILMSNESLSTIISPKLSSENDQPLVDGTEKVSVTLTLTTEAANNVQSVIAAVTDLLKMAYPTTIDVHQ…
#ASH1_allelic_pair
>Av_s450_GSADVT00056000001
MFYQLVYLNKVLLKMVFDQIIIRKVRMKRFEFRQKTTTCDLPFYLFSSKTHQRRSRQSSGSLPQFYTGIYESDDDNNTAPHIDYRLPYDIYWHGQQESKQASVINSTLPLSSSSITANFHQTKKKSNKPKQKQPSPYKKLFRNVYSDQLKQSLLTSYSTENAPVCDCKPPGTCEDGVCVNKMIFTECLTNCACGTKCSNQKIRKNQWFKHLEVFDTGKYGQGLRTATPISKGTFLCEYVGEIITDEKFQDRMINLYSKDEHHYTMKLTQNLVIDAYRMGSIARFANHSCSPNCEFEKWTVDGLPRMCMFSLRSIKAGEELTYDYNFKCFNLQAQQPCYCESSKCRGKIGAKQGRTSSSNVTSNTDNHSLSTTMQKLTQREKRMVFQSSIFLLRNLRKIQ…
>Av_s335_GSADVT00049675001
MKSQNPSSKEFRQKTTKCNLTFYLFSSKTHQRRSRQSSGSLPQFYTGIYESDDDNNTTPHIDYHLPYDIYWHGQQESKQASVINSTLPLSSSSITANIHQTKKKSNKPKQKQPSPYKKLFRNVYSDQLKQSLLTSYSTENAPVCDCKPPGTCEDDVCVNKMIFTECLTSCACGTKCSNQKIRKNQWFKHLEVFDTGKYGQGLRTATPISKGTFLCEYVGEIITDEKFQDRMINLYSKDEHHYTMKLTQNLVIDAYRMGSMARFANHSCSPNCEFEKWTVDGLPRMCMFSLRSIKAGEELTYDYNFKCFNLQAQQPCYCESSKCRGKIGAKQRRTSSSNVTNNTDNHSLSTTMQKLTQREKRMVFQSSIFLLRNLRKIQTKQQSIKMNGNKSPIQTDKQS…
#SETD2_allelic_pair
>Av_s458_GSADVT00056330001
MIAQDHRREQKDEINNNHHHKSSRHHSSATSNNRRRSPSQDTNSKDRKSSRSITSRREESLSKKSNSSPHDRHSKSNHSSSHRRGSSIILSPSPPSRSRHSATVTTTDRLTTKNTLSPKKDDRTSKSSRQTTESITNSKSTNSISSSDSQNNKKHQPTSSETNTDKIRTNDTNVTKSSKPEENSPKPQSSNKQEKSKPTHEHDYQRRKSSSSARPDRHCSKSHDTKSDRKIIEPSNSNDSSLNKTKTNHETNNHDKKSSRGSSIPSTHDDHHGRRRRRSSDYHRHDSPLRHDRRSDHYRRHRSPHYSNTHYVHHHHHHHYRSTSSRYRHHRRRSSSPRSHQHRSRYSSSTSSSSLSFSPRRRSRSRTSYSSTRSSSSYSSISRTSSSTSRSSSRNNHYY…
>Av_s228_GSADVT00041407001
MIAQDHRREQKDEINNNYHKSSRHHSSATSNNRRRSPSQDTNSKDRKSSRSVTSRKEESLSKKSNSSPHDRHSKSNHNSSHRRGLSIILSPSPSRSRHSATVTTTDRLTTKNTLSPKKDDRTSKSSRQTTESITNSKSTNSISSSDSQNNKNHQPASSETNNDKTRTNDTNITKSSKPEENSPKPQSSNKQEKSKSTNEHDSQRRKSSSSARPDRHCSKSHETKSDRKIIEPSSSNDSSLNKTKTNHETNNHDKKSSRGSSIPSTHDDHHGRRRRRRSSDYHRHDSPLRHDRRSDHYRRHRSPHYSNTHYVHHHHHHHYRSTSSRYRHHRRRSSSPRSHQHRSRYSSSTSSSSLSFSPRRRSRSRTSYSSTRSSSSYSSISRTSSSTSRSSSRNNHYYH…
#SET-only_SET2-like_allelic_pair_short
>Av_s26_SNAPT00009192001
MTTTIEQQTITTAAALNEKTPFVYIDSCLIQTTNEEDEQYEGCLCSSEDTCTNCSCATRFGLNYDSNCCLNSNKLGPILECNSECNCLLETCQNRVSQQEDQSKNVQIISTSNKGNGVIVNKPIHRSGTYIGEYVGEVLSEEEAHRRIAQTETFEHNYLLLYNEHHSQSIIKTFIDARYYGNWTRFINHSCNPNLHIVPIRIDQPTPPRLAFFTLREIQEHEELSYSYGTIVDDKFSKPCHCSSSSCIGFMPYQQTD
>Av_s333_SNAPT00053914001
MKNTICGRKWFSFSYIDSCLIQTTNEEDEQYEGCLCSSEDTCTNCSCATRFGLNYDSNCCLNSNKLGPVLECNSECDCLLETCQNRVSQQEDQSKNVQIISTSNKGNGVIINKPIQRSGTYIGEYVGEVLSEEEAHRRIAQTKTFEHNYLLLYNEHHSQSIIKTFIDARYYGNWTRFINHSCNPNLHIVPIRIDQPTPPRLAFFTLREIQEHEELSYSYGTIVDDKFSKPCHCSSSSCIGFMPYQQTD
#SET-only_PRDM-like_3_allelic_pairs_short
>Av_s47_SNAPT00014802001
MVLKMIKSEKSNCDTCQKYNTSLCPQGCQTYEANRYADHAKDTVPNGIEIAKSIISSAGLGAFARKFFSKNTFFGPYTGDRHRSAERANQSGYAWTIDDAKGNIYNYIDATNPHRSNWLRYVNCSLRQNQENLTAIQFNGEIYYRTIRDIKAGEELFVHYGEEYARALGIDPFEYFIGKLQG
>Av_s16_SNAPT00005982001
MVLKMIKSEKSISIKLDCDTCQKYNTSLCPQGCQTYEANRYADHAKDTVPNGIEIAKSIISSAGLGAFARKFFSKNTFLGPYTGDRHRSAERANQSGYAWAIDDAKGNIYNYIDASNPHRSNWLRYVNCSLRQNQENLTAIQFNGEIYYRTIRDIKAGEELFVHYGEEYARALGIDPFEYFIGKLQG
>Av_s30_SNAPT00010322001
MYEQEHSNRRNLTSIHSGEKKRKDSSDFKINESKKKFSSKHSSHDKSKYRRTSSKSEFDDVRLFCDDCNQYYDNICPYHKQTYIPDRKISKLSLKHSQLKSDFTCPDGLILKLSTISNAGKGVFTTKRLEKNTFFGPYLGIRHSNFKNAQESGYAWSIVDKHGKMIYIIDGSDPNTSPNTYEQQNLQAIQYDRNMFYKTIRTIQPGEELFVYYGDDYARFLGIQPFSTHSIEKTENNNSDDGNE
>Av_s199_SNAPT000405620013001
MYEQEHSNRRNLTSIHSGEKKRKDSSDFKINESKKKFSSKHSSHDKSKYRRASSKPEFDDVRLFCDDCNQYYDNICPYHKQIYIPDRKISKLSLKHSQLKSDFTCPDGLILKLSTISNAGKGVFTTKRLEKNTFFGPYLGIRHSNFKNAQESGYAWSIVDKHGKMIYIIDGNDPNTSPNTYEQQNLQAIQYDRNMFYKTIRTIQPGEELFVYYGDDYARFLGIQPFSTDSIEKTENNNSDDGNE
>Av_s367_SNAPT00056564001
MFYRIFLMVHYIFFFLDTPPTLCYGVVNNNKLFPLNKQLLSKFTHIRDAQVIYPLLVNVDNYALATIPSDTVHIGLSSIPNAGQGAFAARPIARLTYFGPYCCDKHNDSHYAAMSSYTWEVLDESGQIMHYVDAAKFNKSNWLRYINCANTLAQQNLIAFITNGDVFYLAVRNISVGEELLVYYGNNYARKLGIDPDKFYS
>Av_s5_SNAPT00001703001
MFYRIFLMIHYIFFFLDTPPTLCYGVVNNNKLFPLNKQLLSKFTHIRDAQVIYPLLVNVDNYVLATIPSDTVYIGLSSIPNAGQGAFAARPIARLSYFGPYCCDKHNDSHYAAMSSYTWEVLDESGQIMHYVDAAKFNKSNWLRYINCANTLAQQNLIAFITNGDVFYLVVRNISVGEELLVYYGNNYARKLGIDPDKFYS
#SETD8/SET1-like_2_allelic pairs
>Av_s55_GSADVT00013834001
MIPVRPAKRFQSSANIKSDRLRKGGLLKGQFLFAPDICIPEDEILSSIPHPAPVPLSTDSPKPPVTLTKTVIHVDTSESISTLRRSKRQLSKQLGITKYKSATSFDSFIETQCEDGLQARHTGTVKGRGVYTTKKFFRNDYIVEYAGKLLTQAEAKHRENIYGRNHNIGCYMYYFKWGEKVYCVDATEETNRLGRLINHSRKNSNCQPKVFTVRDQPRLILVALRDIEIGEELFYDYGERRKDIVEAFPWLNE
>Av_s75_SNAPT00021200001
MIPARPAKRFQSSANIKSDRLRKGGLLKGQFLFAPDICIPEDEILSSIPHPAPVPLSTDSPKPPVTLTKTVIHVDTSESISTLRRSKRQLSKQLGITKYKSATSFDSFIETQCEDGLQARHTGTVKGRGVYTTKKFFRNDYIVEYAGKLLTQAEAKHRENIYGRNHNIGCYMYYFKWGEKVYCVDATEETNRLGRLINHSRKNSNCQPKVFTVRDQPRLILVALRDIEIDEELFYDYGERRKDIVEAFPWLNE
>Av_s266_SNAPT00047944001
MFLCVKKKAFYFYYELRLPNHAELKSFYMIPVRPAKRFQSAANVKPDRLRKGVLKGQFLFAPDISIPENDILPSTTTTTTTDNEKSLILAKKLLNEEILSSLRRSQRIGITKYKSATSFDSFIESQSEDGIEARDTGTIKGRGVFTMRKFYRNDYIVEYAGELLTQNEAKHRENLYGRNHKIGCYMYYFKWGEKVFCVDATEETNRLGRLINHSRKNSNCQPKVFVIRDQPRLVLVALRDIEVDEELFYDYGERRKDIIDAFPWLNE
>Av_s3969_SNAPT00084897001
MIPVRPAKRFQSAANVKPDRLRKGVLXGPISFCLPDIINNLKNDILPSTTTTTTTTTTDNEKSLILAKKLLNEEILSSLRRSQRIGITKYKSATSFDSFIESQSEDGIEARDTGTIKGRGVFTMRKFYRNDYIVEYAGELLTQNEAKHRENLYGRNHKIGCYMYYFKWGEKVFCVDATEETNRLGXXXXXXXXXXXXXXXXXXXXXXXXXXXXXXXXXXXXXXXXXXXXGERRKDIIDAFPWLNE

## Sheet: Data_S4
Supplementary Data File 4. Contigs with residual bacterial sequence joined to AvL1 DNA (.gff format).
##gff3 format
##Contigs with residual bacterial sequence contamination; formed by a large eukaryotic sequence stretch plus a small bacterial segment
Contig1072	Pbjelly	Contig	1	45855	.	+	.	Name=Contig-Artifact
Contig13344	Pbjelly	Contig	1	83930	.	+	.	Name=Contig-Artifact
Contig1579	Pbjelly	Contig	1	47016	.	+	.	Name=Contig-Artifact
Contig16910	Pbjelly	Contig	1	8487	.	+	.	Name=Contig-Artifact
Contig17250	Pbjelly	Contig	1	57209	.	+	.	Name=Contig-Artifact
Contig1944	Pbjelly	Contig	1	240132	.	+	.	Name=Contig-Artifact
Contig1982	Pbjelly	Contig	1	34225	.	+	.	Name=Contig-Artifact
Contig2466	Pbjelly	Contig	1	3431	.	+	.	Name=Contig-Artifact
Contig3098	Pbjelly	Contig	1	44105	.	+	.	Name=Contig-Artifact
Contig365	Pbjelly	Contig	1	25727	.	+	.	Name=Contig-Artifact
Contig7706	Pbjelly	Contig	1	8469	.	+	.	Name=Contig-Artifact
Contig7872	Pbjelly	Contig	1	21105	.	+	.	Name=Contig-Artifact
Contig900	Pbjelly	Contig	1	98856	.	+	.	Name=Contig-Artifact
