# Supplementary material for: Bacterial N4-methylcytosine as an epigenetic mark in eukaryotic DNA
Source: Research Square preprint supplement (doi:10.21203/rs.3.rs-360382/v1), 2021-08-16
Supplement: Supplementary file 3 [file a2e48e0f1db62aeee0462b92.docx]

The ChIP1472 seq, MeDIP-seq and RNA-seq datasets were deposited in GEO under accession GSE140052.

To access the GEO data for review anonymously:
Go to https://www.ncbi.nlm.nih.gov/geo/query/acc.cgi?acc=GSE140052
Enter token gjivsccelfkllkb into the box

Sequences obtained in this study were deposited under BioProject 1470 PRJNA558051 (SRA accession Nos. SRR9886612, SRR9900832-45 for individual SMRT cells).

The 1471 Avaga_MBL_L1 genome assembly was deposited under accession No. JAGENE000000000.
