# Supplementary material for: Bacterial N4-methylcytosine as an epigenetic mark in eukaryotic DNA
Source: Research Square preprint supplement (doi:10.21203/rs.3.rs-360382/v1), 2021-08-16
Supplement: Supplementary file 4 [file 4763805e0975dda2977aebb3.xlsx]

## Sheet: Av
GSADVT00000020001	6mA	GO:0003674,GO:0003824,GO:0006508,GO:0008150,GO:0008152,GO:0008233,GO:0008234,GO:0016787,GO:0019538,GO:0043170,GO:0044238,GO:0070011,GO:0071704
GSADVT00040495001	6mA	GO:0000003,GO:0000165,GO:0000166,GO:0000185,GO:0001882,GO:0001883,GO:0001932,GO:0001934,GO:0002119,GO:0002164,GO:0003674,GO:0003824,GO:0004672,GO:0004674,GO:0004702,GO:0004871,GO:0005057,GO:0005488,GO:0005524,GO:0005575,GO:0005737,GO:0006464,GO:0006468,GO:0006793,GO:0006796,GO:0006928,GO:0006950,GO:0007165,GO:0007346,GO:0007411,GO:0008150,GO:0008152,GO:0008349,GO:0009653,GO:0009791,GO:0009893,GO:…
GSADVT00000228001	6mA	GO:0000012,GO:0000122,GO:0000166,GO:0000183,GO:0000302,GO:0000720,GO:0000731,GO:0000785,GO:0000790,GO:0000791,GO:0000792,GO:0000975,GO:0000976,GO:0000988,GO:0000989,GO:0001046,GO:0001047,GO:0001067,GO:0001525,GO:0001542,GO:0001558,GO:0001666,GO:0001678,GO:0001932,GO:0001933,GO:0001934,GO:0001936,GO:0001938,GO:0002039,GO:0002682,GO:0002684,GO:0002819,GO:0002821,GO:0003674,GO:0003676,GO:0003677,GO:…
GSADVT00027213001	6mA	GO:0000014,GO:0000075,GO:0000077,GO:0000280,GO:0000724,GO:0000725,GO:0003674,GO:0003676,GO:0003677,GO:0003824,GO:0004518,GO:0004519,GO:0004520,GO:0004536,GO:0005488,GO:0005575,GO:0005634,GO:0006139,GO:0006259,GO:0006281,GO:0006302,GO:0006310,GO:0006725,GO:0006807,GO:0006950,GO:0006974,GO:0006996,GO:0007049,GO:0007067,GO:0008150,GO:0008152,GO:0009987,GO:0016043,GO:0016787,GO:0016788,GO:0022402,GO:…
GSADVT00066403001	6mA	GO:0000014,GO:0000075,GO:0000726,GO:0000729,GO:0000737,GO:0000738,GO:0003674,GO:0003676,GO:0003677,GO:0003690,GO:0003697,GO:0003824,GO:0004518,GO:0004519,GO:0004520,GO:0004536,GO:0005488,GO:0005515,GO:0005575,GO:0005634,GO:0006139,GO:0006259,GO:0006281,GO:0006282,GO:0006302,GO:0006303,GO:0006308,GO:0006325,GO:0006464,GO:0006479,GO:0006725,GO:0006807,GO:0006950,GO:0006974,GO:0006996,GO:0007093,GO:…
GSADVT00011884001	6mA	GO:0000018,GO:0000019,GO:0000122,GO:0000166,GO:0000183,GO:0000785,GO:0000790,GO:0000792,GO:0001300,GO:0003674,GO:0003824,GO:0004407,GO:0005488,GO:0005575,GO:0005720,GO:0005721,GO:0005829,GO:0006139,GO:0006325,GO:0006342,GO:0006351,GO:0006355,GO:0006357,GO:0006464,GO:0006476,GO:0006725,GO:0006807,GO:0006996,GO:0007568,GO:0007569,GO:0008150,GO:0008152,GO:0008270,GO:0009058,GO:0009059,GO:0009889,GO:…
GSADVT00008641001	6mA	GO:0000022,GO:0000226,GO:0000463,GO:0000470,GO:0002181,GO:0003674,GO:0003676,GO:0003723,GO:0003735,GO:0005198,GO:0005488,GO:0005575,GO:0005840,GO:0006139,GO:0006364,GO:0006412,GO:0006725,GO:0006807,GO:0006996,GO:0007010,GO:0007017,GO:0007051,GO:0007052,GO:0008150,GO:0008152,GO:0009058,GO:0009059,GO:0009987,GO:0015934,GO:0016043,GO:0016070,GO:0016072,GO:0019538,GO:0022402,GO:0022625,GO:0030529,GO:…
GSADVT00064957001	6mA	GO:0000022,GO:0000910,GO:0000922,GO:0003674,GO:0005488,GO:0005515,GO:0005575,GO:0005634,GO:0005654,GO:0005737,GO:0005819,GO:0005829,GO:0005856,GO:0005874,GO:0005876,GO:0005886,GO:0007017,GO:0007165,GO:0007264,GO:0008092,GO:0008150,GO:0008284,GO:0009987,GO:0015630,GO:0016020,GO:0019894,GO:0019899,GO:0019900,GO:0019901,GO:0022402,GO:0030496,GO:0032991,GO:0035556,GO:0042127,GO:0042802,GO:0043226,GO:…
GSADVT00007201001	6mA	GO:0000028,GO:0000184,GO:0000956,GO:0003674,GO:0003676,GO:0003723,GO:0003729,GO:0003735,GO:0005198,GO:0005488,GO:0005575,GO:0005829,GO:0005912,GO:0005924,GO:0005925,GO:0006139,GO:0006401,GO:0006402,GO:0006412,GO:0006413,GO:0006414,GO:0006415,GO:0006417,GO:0006448,GO:0006450,GO:0006605,GO:0006612,GO:0006613,GO:0006614,GO:0006725,GO:0006807,GO:0006810,GO:0006886,GO:0008104,GO:0008150,GO:0008152,GO:…
GSADVT00004678001	6mA	GO:0000030,GO:0003674,GO:0003824,GO:0005575,GO:0005783,GO:0005789,GO:0005794,GO:0005975,GO:0006629,GO:0006643,GO:0006644,GO:0006664,GO:0006665,GO:0006673,GO:0006675,GO:0006687,GO:0006688,GO:0006793,GO:0006796,GO:0006807,GO:0006810,GO:0006886,GO:0006897,GO:0007034,GO:0007038,GO:0008104,GO:0008150,GO:0008152,GO:0008610,GO:0008654,GO:0009058,GO:0009247,GO:0009987,GO:0015031,GO:0016020,GO:0016021,GO:…
GSADVT00041777001	6mA	GO:0000041,GO:0000166,GO:0001568,GO:0001701,GO:0001775,GO:0001836,GO:0001882,GO:0001883,GO:0001974,GO:0002082,GO:0002252,GO:0002263,GO:0002285,GO:0002286,GO:0002287,GO:0002292,GO:0002293,GO:0002294,GO:0002366,GO:0002376,GO:0002521,GO:0003674,GO:0003824,GO:0004008,GO:0005215,GO:0005375,GO:0005488,GO:0005507,GO:0005524,GO:0005575,GO:0005768,GO:0005770,GO:0005794,GO:0005798,GO:0005802,GO:0005887,GO:…
GSADVT00006903001	6mA	GO:0000041,GO:0000166,GO:0001882,GO:0001883,GO:0003674,GO:0003824,GO:0003924,GO:0005215,GO:0005381,GO:0005488,GO:0005525,GO:0005575,GO:0005634,GO:0005737,GO:0005783,GO:0005829,GO:0006810,GO:0006811,GO:0006812,GO:0006826,GO:0006913,GO:0008104,GO:0008150,GO:0008324,GO:0015030,GO:0015031,GO:0015075,GO:0015093,GO:0015684,GO:0016020,GO:0016021,GO:0016462,GO:0016482,GO:0016604,GO:0016787,GO:0016817,GO:…
GSADVT00002954001	6mA	GO:0000041,GO:0000302,GO:0001666,GO:0001932,GO:0001934,GO:0003674,GO:0005215,GO:0005216,GO:0005261,GO:0005262,GO:0005488,GO:0005575,GO:0005737,GO:0005829,GO:0005886,GO:0005887,GO:0005911,GO:0006521,GO:0006810,GO:0006811,GO:0006812,GO:0006828,GO:0006873,GO:0006874,GO:0006875,GO:0006950,GO:0006979,GO:0007204,GO:0007338,GO:0007568,GO:0008150,GO:0008324,GO:0009566,GO:0009628,GO:0009893,GO:0009987,GO:…
GSADVT00033519001	6mA	GO:0000041,GO:0003674,GO:0005215,GO:0005385,GO:0005575,GO:0005634,GO:0005737,GO:0005794,GO:0005886,GO:0006810,GO:0006811,GO:0006812,GO:0006829,GO:0008150,GO:0008324,GO:0009987,GO:0015075,GO:0016020,GO:0016021,GO:0022857,GO:0022890,GO:0022891,GO:0022892,GO:0030001,GO:0031224,GO:0034220,GO:0043226,GO:0043227,GO:0043229,GO:0043231,GO:0044424,GO:0044425,GO:0044444,GO:0044464,GO:0044699,GO:0044763,GO:…
GSADVT00003778001	6mA	GO:0000041,GO:0003674,GO:0005215,GO:0005385,GO:0005575,GO:0005886,GO:0006810,GO:0006811,GO:0006812,GO:0006828,GO:0006829,GO:0008150,GO:0008324,GO:0009987,GO:0010035,GO:0010038,GO:0010043,GO:0015075,GO:0016020,GO:0016021,GO:0022857,GO:0022890,GO:0022891,GO:0022892,GO:0030001,GO:0031224,GO:0032844,GO:0032879,GO:0034220,GO:0042221,GO:0044425,GO:0044464,GO:0044699,GO:0044763,GO:0044765,GO:0046873,GO:…
GSADVT00041164001	6mA	GO:0000041,GO:0003674,GO:0005215,GO:0005575,GO:0005886,GO:0006810,GO:0006811,GO:0006812,GO:0006829,GO:0008150,GO:0008324,GO:0009987,GO:0015075,GO:0016020,GO:0016021,GO:0022857,GO:0022890,GO:0022891,GO:0022892,GO:0030001,GO:0031224,GO:0034220,GO:0044425,GO:0044464,GO:0044699,GO:0044763,GO:0044765,GO:0046873,GO:0051179,GO:0051234,GO:0055085,GO:0071577,GO:0098655,GO:0098660,GO:0098662,GO:1902578
GSADVT00004731001	6mA	GO:0000045,GO:0000422,GO:0003674,GO:0005488,GO:0005515,GO:0005543,GO:0005575,GO:0005829,GO:0006464,GO:0006497,GO:0006914,GO:0006996,GO:0007005,GO:0007033,GO:0008104,GO:0008150,GO:0008152,GO:0008289,GO:0009056,GO:0009987,GO:0016020,GO:0016043,GO:0019538,GO:0019898,GO:0022411,GO:0022607,GO:0031090,GO:0032266,GO:0033036,GO:0034045,GO:0034497,GO:0034613,GO:0035091,GO:0036211,GO:0043167,GO:0043168,GO:…
GSADVT00018473001	6mA	GO:0000049,GO:0000166,GO:0001510,GO:0002097,GO:0002098,GO:0003674,GO:0003676,GO:0003723,GO:0003824,GO:0005488,GO:0005506,GO:0005575,GO:0005634,GO:0005654,GO:0005829,GO:0005856,GO:0006139,GO:0006399,GO:0006400,GO:0006725,GO:0006807,GO:0006950,GO:0006974,GO:0008033,GO:0008150,GO:0008152,GO:0008168,GO:0008173,GO:0008175,GO:0008270,GO:0009451,GO:0009987,GO:0015630,GO:0016070,GO:0016300,GO:0016491,GO:…
GSADVT00004194001	6mA	GO:0000049,GO:0003674,GO:0003676,GO:0003723,GO:0003824,GO:0005488,GO:0005506,GO:0005515,GO:0006139,GO:0006399,GO:0006400,GO:0006725,GO:0006807,GO:0008033,GO:0008150,GO:0008152,GO:0009058,GO:0009451,GO:0009987,GO:0016070,GO:0016491,GO:0016705,GO:0016706,GO:0031590,GO:0031591,GO:0034470,GO:0034641,GO:0034660,GO:0042802,GO:0042803,GO:0043167,GO:0043169,GO:0043170,GO:0043412,GO:0044237,GO:0044238,GO:…
GSADVT00025262001	6mA	GO:0000049,GO:0003674,GO:0003676,GO:0003723,GO:0003824,GO:0005488,GO:0005575,GO:0005730,GO:0005737,GO:0008168,GO:0008173,GO:0008175,GO:0008757,GO:0016427,GO:0016428,GO:0016740,GO:0016741,GO:0043226,GO:0043228,GO:0043229,GO:0043232,GO:0044422,GO:0044424,GO:0044428,GO:0044446,GO:0044464,GO:0097159,GO:1901363
GSADVT00001207001	6mA	GO:0000059,GO:0000060,GO:0000226,GO:0003674,GO:0003676,GO:0003723,GO:0005048,GO:0005215,GO:0005488,GO:0005515,GO:0005575,GO:0005635,GO:0005654,GO:0005737,GO:0006461,GO:0006606,GO:0006607,GO:0006610,GO:0006810,GO:0006886,GO:0006913,GO:0006928,GO:0006996,GO:0007010,GO:0007017,GO:0007018,GO:0007051,GO:0007052,GO:0007079,GO:0007080,GO:0007165,GO:0007264,GO:0007265,GO:0008104,GO:0008139,GO:0008150,GO:…
GSADVT00006778001	6mA	GO:0000060,GO:0000975,GO:0000981,GO:0001067,GO:0001071,GO:0001654,GO:0001752,GO:0003002,GO:0003674,GO:0003676,GO:0003677,GO:0003700,GO:0003705,GO:0005488,GO:0005515,GO:0005575,GO:0005634,GO:0005667,GO:0005737,GO:0005829,GO:0006355,GO:0006357,GO:0006810,GO:0006886,GO:0007379,GO:0007380,GO:0007383,GO:0007389,GO:0007420,GO:0007422,GO:0007423,GO:0007432,GO:0007447,GO:0007449,GO:0007476,GO:0007479,GO:…
GSADVT00016459001	6mA	GO:0000060,GO:0000981,GO:0000988,GO:0000989,GO:0001071,GO:0001654,GO:0002070,GO:0002088,GO:0003002,GO:0003404,GO:0003674,GO:0003676,GO:0003677,GO:0003700,GO:0003705,GO:0003712,GO:0003713,GO:0005488,GO:0005575,GO:0005634,GO:0006139,GO:0006351,GO:0006355,GO:0006357,GO:0006725,GO:0006807,GO:0006810,GO:0006886,GO:0006915,GO:0006928,GO:0007389,GO:0007420,GO:0007423,GO:0008104,GO:0008150,GO:0008152,GO:…
GSADVT00000376001	6mA	GO:0000062,GO:0000139,GO:0003674,GO:0005488,GO:0005515,GO:0005575,GO:0005739,GO:0005794,GO:0006629,GO:0006694,GO:0006810,GO:0008150,GO:0008152,GO:0008202,GO:0008610,GO:0009058,GO:0016020,GO:0016021,GO:0031090,GO:0031224,GO:0034237,GO:0043167,GO:0043168,GO:0043226,GO:0043227,GO:0043229,GO:0043231,GO:0044238,GO:0044422,GO:0044424,GO:0044425,GO:0044431,GO:0044444,GO:0044446,GO:0044464,GO:0044699,GO:…
GSADVT00016139001	6mA	GO:0000062,GO:0000166,GO:0003674,GO:0003824,GO:0003995,GO:0004085,GO:0005488,GO:0005575,GO:0005739,GO:0005759,GO:0006082,GO:0006461,GO:0006629,GO:0006631,GO:0006635,GO:0006950,GO:0008150,GO:0008152,GO:0009055,GO:0009056,GO:0009062,GO:0009605,GO:0009719,GO:0009725,GO:0009987,GO:0009991,GO:0010033,GO:0014070,GO:0016020,GO:0016042,GO:0016043,GO:0016054,GO:0016491,GO:0016627,GO:0019395,GO:0019605,GO:…
GSADVT00007632001	6mA	GO:0000062,GO:0003674,GO:0005488,GO:0006810,GO:0008150,GO:0008289,GO:0008340,GO:0019915,GO:0032501,GO:0043167,GO:0043168,GO:0044699,GO:0044707,GO:0048037,GO:0050662,GO:0051179,GO:0051234,GO:0051235,GO:0065007,GO:0065008,GO:1901681
GSADVT00066521001	6mA	GO:0000070,GO:0000075,GO:0000077,GO:0000086,GO:0000122,GO:0000166,GO:0000226,GO:0000280,GO:0000281,GO:0000776,GO:0000777,GO:0000819,GO:0000910,GO:0000922,GO:0001578,GO:0001882,GO:0001883,GO:0003674,GO:0003824,GO:0004672,GO:0004674,GO:0005488,GO:0005515,GO:0005524,GO:0005575,GO:0005634,GO:0005737,GO:0005813,GO:0005815,GO:0005819,GO:0006355,GO:0006357,GO:0006464,GO:0006468,GO:0006793,GO:0006796,GO:…
GSADVT00049105001	6mA	GO:0000075,GO:0000077,GO:0000166,GO:0000932,GO:0001882,GO:0001883,GO:0002064,GO:0002066,GO:0002682,GO:0002697,GO:0002831,GO:0003006,GO:0003008,GO:0003674,GO:0003676,GO:0003723,GO:0003724,GO:0003824,GO:0004004,GO:0004386,GO:0005488,GO:0005524,GO:0005575,GO:0005737,GO:0005875,GO:0006139,GO:0006725,GO:0006807,GO:0006950,GO:0006974,GO:0006996,GO:0007093,GO:0007095,GO:0007279,GO:0007346,GO:0007349,GO:…
GSADVT00007433001	6mA	GO:0000075,GO:0000077,GO:0000280,GO:0000428,GO:0001192,GO:0001193,GO:0003674,GO:0003676,GO:0003677,GO:0003824,GO:0003899,GO:0005488,GO:0005575,GO:0005634,GO:0005665,GO:0005730,GO:0006139,GO:0006259,GO:0006281,GO:0006283,GO:0006289,GO:0006351,GO:0006352,GO:0006366,GO:0006367,GO:0006725,GO:0006807,GO:0006950,GO:0006974,GO:0006996,GO:0007067,GO:0007093,GO:0007095,GO:0007346,GO:0008150,GO:0008152,GO:…
GSADVT00005834001	6mA	GO:0000075,GO:0000077,GO:0002039,GO:0002230,GO:0002682,GO:0002697,GO:0002831,GO:0003674,GO:0003824,GO:0004842,GO:0005488,GO:0005515,GO:0005575,GO:0005634,GO:0005654,GO:0005737,GO:0006139,GO:0006259,GO:0006281,GO:0006464,GO:0006725,GO:0006807,GO:0006950,GO:0006974,GO:0007093,GO:0007346,GO:0008150,GO:0008152,GO:0008270,GO:0009314,GO:0009628,GO:0009987,GO:0010212,GO:0010564,GO:0010948,GO:0016567,GO:…
GSADVT00000810001	6mA	GO:0000075,GO:0000077,GO:0003674,GO:0003824,GO:0004843,GO:0005575,GO:0005634,GO:0005654,GO:0005737,GO:0006139,GO:0006259,GO:0006281,GO:0006464,GO:0006508,GO:0006511,GO:0006725,GO:0006807,GO:0006950,GO:0006974,GO:0007165,GO:0008150,GO:0008152,GO:0008233,GO:0008234,GO:0008283,GO:0008630,GO:0009056,GO:0009057,GO:0009314,GO:0009628,GO:0009987,GO:0010212,GO:0016579,GO:0016787,GO:0019538,GO:0019783,GO:…
GSADVT00025988001	6mA	GO:0000075,GO:0000166,GO:0000712,GO:0000819,GO:0001882,GO:0001883,GO:0003674,GO:0003676,GO:0003677,GO:0003824,GO:0003916,GO:0003918,GO:0005488,GO:0005524,GO:0005575,GO:0005634,GO:0006139,GO:0006259,GO:0006265,GO:0006725,GO:0006807,GO:0006996,GO:0007059,GO:0007093,GO:0007346,GO:0008094,GO:0008150,GO:0008152,GO:0009987,GO:0016043,GO:0016462,GO:0016787,GO:0016817,GO:0016818,GO:0016853,GO:0016887,GO:…
GSADVT00017965001	6mA	GO:0000079,GO:0000082,GO:0000122,GO:0000165,GO:0000186,GO:0000209,GO:0000278,GO:0000502,GO:0001558,GO:0001932,GO:0001934,GO:0002218,GO:0002220,GO:0002223,GO:0002253,GO:0002376,GO:0002429,GO:0002474,GO:0002478,GO:0002479,GO:0002682,GO:0002684,GO:0002757,GO:0002758,GO:0002764,GO:0002768,GO:0003674,GO:0003824,GO:0005488,GO:0005515,GO:0005575,GO:0005634,GO:0005654,GO:0005737,GO:0005829,GO:0005838,GO:…
GSADVT00013348001	6mA	GO:0000079,GO:0000166,GO:0001882,GO:0001883,GO:0001932,GO:0001934,GO:0003674,GO:0003824,GO:0004672,GO:0004674,GO:0005488,GO:0005524,GO:0005575,GO:0005634,GO:0005737,GO:0005886,GO:0006022,GO:0006355,GO:0006464,GO:0006468,GO:0006793,GO:0006796,GO:0006807,GO:0006915,GO:0007049,GO:0007165,GO:0007346,GO:0008150,GO:0008152,GO:0008219,GO:0008283,GO:0009889,GO:0009893,GO:0009987,GO:0010468,GO:0010556,GO:…
GSADVT00017519001	6mA	GO:0000079,GO:0000307,GO:0000785,GO:0001932,GO:0001934,GO:0005575,GO:0005634,GO:0005654,GO:0005730,GO:0005829,GO:0007049,GO:0008150,GO:0009893,GO:0009987,GO:0010562,GO:0010604,GO:0016020,GO:0019220,GO:0019222,GO:0031090,GO:0031323,GO:0031325,GO:0031399,GO:0031401,GO:0031965,GO:0032268,GO:0032270,GO:0032991,GO:0033674,GO:0042325,GO:0042327,GO:0043085,GO:0043226,GO:0043227,GO:0043228,GO:0043229,GO:…
GSADVT00018763001	6mA	GO:0000079,GO:0001932,GO:0003674,GO:0005488,GO:0005515,GO:0005575,GO:0008150,GO:0016021,GO:0019220,GO:0019222,GO:0019899,GO:0019900,GO:0019901,GO:0031224,GO:0031323,GO:0031399,GO:0032268,GO:0042325,GO:0043549,GO:0044425,GO:0045859,GO:0050789,GO:0050790,GO:0050794,GO:0051174,GO:0051246,GO:0051338,GO:0051726,GO:0060255,GO:0065007,GO:0065009,GO:0071900,GO:0080090
GSADVT00019361001	6mA	GO:0000082,GO:0000166,GO:0000731,GO:0003674,GO:0003676,GO:0003677,GO:0003682,GO:0003824,GO:0003887,GO:0004518,GO:0004527,GO:0005488,GO:0005575,GO:0005634,GO:0005654,GO:0005737,GO:0005886,GO:0006139,GO:0006259,GO:0006260,GO:0006287,GO:0006297,GO:0006725,GO:0006807,GO:0008150,GO:0008152,GO:0008270,GO:0008408,GO:0008622,GO:0009058,GO:0009059,GO:0009987,GO:0016020,GO:0016740,GO:0016772,GO:0016779,GO:…
GSADVT00025004001	6mA	GO:0000082,GO:0000932,GO:0001843,GO:0003674,GO:0003676,GO:0003723,GO:0003824,GO:0004842,GO:0005488,GO:0005515,GO:0005575,GO:0006139,GO:0006417,GO:0006464,GO:0006725,GO:0006807,GO:0007165,GO:0007166,GO:0007167,GO:0007169,GO:0008150,GO:0008152,GO:0008270,GO:0008283,GO:0008543,GO:0009888,GO:0009889,GO:0009890,GO:0009892,GO:0009987,GO:0010468,GO:0010556,GO:0010558,GO:0010586,GO:0010605,GO:0010608,GO:…
GSADVT00019751001	6mA	GO:0000082,GO:0001678,GO:0001975,GO:0002791,GO:0002792,GO:0003008,GO:0003012,GO:0003299,GO:0003300,GO:0003674,GO:0003824,GO:0004721,GO:0004722,GO:0004723,GO:0005488,GO:0005515,GO:0005516,GO:0005575,GO:0005634,GO:0005739,GO:0005829,GO:0005886,GO:0005955,GO:0006355,GO:0006357,GO:0006464,GO:0006470,GO:0006606,GO:0006793,GO:0006796,GO:0006810,GO:0006811,GO:0006812,GO:0006816,GO:0006886,GO:0006913,GO:…
GSADVT00000837001	6mA	GO:0000086,GO:0000166,GO:0000226,GO:0000278,GO:0001882,GO:0001883,GO:0002376,GO:0002478,GO:0002495,GO:0002504,GO:0003674,GO:0003676,GO:0003723,GO:0003774,GO:0003777,GO:0003824,GO:0005488,GO:0005524,GO:0005575,GO:0005813,GO:0005815,GO:0005829,GO:0005868,GO:0005874,GO:0005875,GO:0006810,GO:0006928,GO:0006996,GO:0007010,GO:0007017,GO:0007018,GO:0007049,GO:0007051,GO:0007052,GO:0008150,GO:0009987,GO:…
GSADVT00000842001	6mA	GO:0000086,GO:0000278,GO:0000280,GO:0001701,GO:0001776,GO:0002260,GO:0002376,GO:0005575,GO:0005634,GO:0005654,GO:0005813,GO:0005815,GO:0005829,GO:0005856,GO:0006996,GO:0006998,GO:0007049,GO:0007067,GO:0007077,GO:0008150,GO:0009790,GO:0009792,GO:0009987,GO:0015630,GO:0016020,GO:0016043,GO:0022402,GO:0022411,GO:0030397,GO:0032502,GO:0040007,GO:0042592,GO:0043009,GO:0043029,GO:0043226,GO:0043227,GO:…
GSADVT00013909001	6mA	GO:0000096,GO:0000097,GO:0003674,GO:0003824,GO:0004497,GO:0005488,GO:0005506,GO:0005575,GO:0006082,GO:0006355,GO:0006520,GO:0006534,GO:0006725,GO:0006778,GO:0006779,GO:0006790,GO:0006807,GO:0008150,GO:0008152,GO:0008652,GO:0009058,GO:0009069,GO:0009070,GO:0009072,GO:0009073,GO:0009528,GO:0009535,GO:0009653,GO:0009706,GO:0009887,GO:0009889,GO:0009891,GO:0009893,GO:0009965,GO:0009987,GO:0010277,GO:…
GSADVT00019553001	6mA	GO:0000096,GO:0003674,GO:0003824,GO:0004180,GO:0005488,GO:0005575,GO:0005654,GO:0005737,GO:0005829,GO:0006082,GO:0006518,GO:0006520,GO:0006575,GO:0006749,GO:0006750,GO:0006790,GO:0006805,GO:0006807,GO:0008150,GO:0008152,GO:0008233,GO:0008237,GO:0008238,GO:0009058,GO:0009987,GO:0016787,GO:0016805,GO:0019184,GO:0019752,GO:0031982,GO:0031988,GO:0034641,GO:0034701,GO:0042398,GO:0043043,GO:0043167,GO:…
GSADVT00061063001	6mA	GO:0000099,GO:0000101,GO:0003333,GO:0003674,GO:0003823,GO:0005215,GO:0005342,GO:0005488,GO:0005575,GO:0005886,GO:0006810,GO:0006811,GO:0006820,GO:0006865,GO:0008150,GO:0008509,GO:0008514,GO:0009987,GO:0015075,GO:0015171,GO:0015175,GO:0015179,GO:0015184,GO:0015711,GO:0015804,GO:0015807,GO:0015811,GO:0015849,GO:0016020,GO:0016021,GO:0016324,GO:0022857,GO:0022891,GO:0022892,GO:0031224,GO:0031253,GO:…
GSADVT00007892001	6mA	GO:0000103,GO:0000166,GO:0001882,GO:0001883,GO:0003674,GO:0003824,GO:0004020,GO:0004779,GO:0004781,GO:0005488,GO:0005524,GO:0006790,GO:0008150,GO:0008152,GO:0009987,GO:0016301,GO:0016740,GO:0016772,GO:0016773,GO:0016779,GO:0017076,GO:0030554,GO:0032549,GO:0032550,GO:0032553,GO:0032555,GO:0032559,GO:0035639,GO:0036094,GO:0043167,GO:0043168,GO:0044237,GO:0070566,GO:0097159,GO:0097367,GO:1901265,GO:…
GSADVT00063917001	6mA	GO:0000103,GO:0003674,GO:0003824,GO:0004062,GO:0005575,GO:0005737,GO:0006584,GO:0006629,GO:0006725,GO:0006790,GO:0006807,GO:0008146,GO:0008150,GO:0008152,GO:0009712,GO:0009987,GO:0016740,GO:0016782,GO:0018958,GO:0044237,GO:0044238,GO:0044424,GO:0044464,GO:0044699,GO:0044710,GO:0051923,GO:0071704,GO:1901360,GO:1901564,GO:1901615
GSADVT00002234001	6mA	GO:0000118,GO:0003674,GO:0003824,GO:0004407,GO:0005488,GO:0005575,GO:0005634,GO:0005737,GO:0006139,GO:0006351,GO:0006355,GO:0006725,GO:0006807,GO:0008150,GO:0008152,GO:0009058,GO:0009059,GO:0009889,GO:0009987,GO:0010468,GO:0010556,GO:0010830,GO:0016070,GO:0016787,GO:0016810,GO:0016811,GO:0017136,GO:0018130,GO:0019213,GO:0019219,GO:0019222,GO:0019438,GO:0031078,GO:0031323,GO:0031326,GO:0032041,GO:…
GSADVT00067202001	6mA	GO:0000122,GO:0000123,GO:0000981,GO:0000988,GO:0000989,GO:0001071,GO:0001205,GO:0001228,GO:0003674,GO:0003682,GO:0003700,GO:0003705,GO:0003712,GO:0003713,GO:0005488,GO:0005515,GO:0005575,GO:0005634,GO:0005654,GO:0005737,GO:0005739,GO:0006139,GO:0006325,GO:0006351,GO:0006355,GO:0006357,GO:0006366,GO:0006464,GO:0006473,GO:0006475,GO:0006725,GO:0006807,GO:0006996,GO:0007005,GO:0007049,GO:0008150,GO:…
GSADVT00036858001	6mA	GO:0000122,GO:0000139,GO:0000902,GO:0000904,GO:0000975,GO:0000988,GO:0000989,GO:0001047,GO:0001067,GO:0001071,GO:0001076,GO:0001190,GO:0001525,GO:0001570,GO:0001669,GO:0001701,GO:0001708,GO:0001726,GO:0001763,GO:0001837,GO:0001889,GO:0001947,GO:0002009,GO:0002011,GO:0002040,GO:0002051,GO:0002052,GO:0002064,GO:0002065,GO:0002067,GO:0002193,GO:0002237,GO:0002376,GO:0002437,GO:0002682,GO:0002683,GO:…
GSADVT00029730001	6mA	GO:0000122,GO:0000785,GO:0000790,GO:0000975,GO:0000976,GO:0000977,GO:0000978,GO:0000979,GO:0000987,GO:0001012,GO:0001046,GO:0001047,GO:0001067,GO:0001071,GO:0001085,GO:0001103,GO:0001159,GO:0001568,GO:0001678,GO:0002791,GO:0002793,GO:0003006,GO:0003674,GO:0003676,GO:0003677,GO:0003682,GO:0003700,GO:0005102,GO:0005488,GO:0005515,GO:0005575,GO:0005634,GO:0005654,GO:0005667,GO:0005737,GO:0005975,GO:…
GSADVT00014830001	6mA	GO:0000122,GO:0000785,GO:0000993,GO:0001098,GO:0001099,GO:0001711,GO:0001826,GO:0001829,GO:0001832,GO:0002237,GO:0002682,GO:0002683,GO:0003674,GO:0005488,GO:0005515,GO:0005575,GO:0006139,GO:0006325,GO:0006351,GO:0006355,GO:0006357,GO:0006464,GO:0006479,GO:0006513,GO:0006725,GO:0006807,GO:0006996,GO:0007165,GO:0007166,GO:0007259,GO:0008023,GO:0008150,GO:0008152,GO:0008213,GO:0009058,GO:0009059,GO:…
GSADVT00004201001	6mA	GO:0000122,GO:0000981,GO:0000982,GO:0001071,GO:0001078,GO:0001227,GO:0003674,GO:0003676,GO:0003677,GO:0003700,GO:0005488,GO:0005575,GO:0005634,GO:0006139,GO:0006351,GO:0006355,GO:0006357,GO:0006725,GO:0006807,GO:0008150,GO:0008152,GO:0009058,GO:0009059,GO:0009889,GO:0009890,GO:0009891,GO:0009892,GO:0009893,GO:0009987,GO:0010468,GO:0010556,GO:0010557,GO:0010558,GO:0010604,GO:0010605,GO:0010628,GO:…
GSADVT00006593001	6mA	GO:0000122,GO:0001649,GO:0003674,GO:0005488,GO:0005515,GO:0005575,GO:0005634,GO:0005856,GO:0005912,GO:0005924,GO:0005925,GO:0006139,GO:0006351,GO:0006355,GO:0006357,GO:0006725,GO:0006807,GO:0008134,GO:0008150,GO:0008152,GO:0008270,GO:0009058,GO:0009059,GO:0009719,GO:0009725,GO:0009889,GO:0009890,GO:0009892,GO:0009987,GO:0010033,GO:0010468,GO:0010556,GO:0010558,GO:0010605,GO:0010629,GO:0010941,GO:…
GSADVT00009956001	6mA	GO:0000122,GO:0001708,GO:0001709,GO:0003674,GO:0003676,GO:0003677,GO:0005488,GO:0005575,GO:0005634,GO:0006355,GO:0006357,GO:0007501,GO:0007517,GO:0007521,GO:0008150,GO:0009889,GO:0009890,GO:0009892,GO:0009987,GO:0010468,GO:0010556,GO:0010558,GO:0010605,GO:0010629,GO:0019219,GO:0019222,GO:0031323,GO:0031324,GO:0031326,GO:0031327,GO:0032502,GO:0043226,GO:0043227,GO:0043229,GO:0043231,GO:0043565,GO:…
GSADVT00029216001	6mA	GO:0000122,GO:0003002,GO:0003674,GO:0003676,GO:0003677,GO:0005488,GO:0005575,GO:0005634,GO:0006139,GO:0006351,GO:0006355,GO:0006357,GO:0006725,GO:0006807,GO:0007365,GO:0007367,GO:0007389,GO:0008150,GO:0008152,GO:0009058,GO:0009059,GO:0009889,GO:0009890,GO:0009891,GO:0009892,GO:0009893,GO:0009987,GO:0010468,GO:0010556,GO:0010557,GO:0010558,GO:0010604,GO:0010605,GO:0010628,GO:0010629,GO:0016070,GO:…
GSADVT00040029001	6mA	GO:0000132,GO:0000226,GO:0001736,GO:0001764,GO:0001838,GO:0001944,GO:0002009,GO:0003674,GO:0005488,GO:0005515,GO:0005575,GO:0005737,GO:0005886,GO:0005911,GO:0005912,GO:0005913,GO:0006915,GO:0006928,GO:0006935,GO:0006996,GO:0007010,GO:0007017,GO:0007155,GO:0007163,GO:0007164,GO:0007346,GO:0008150,GO:0008219,GO:0008283,GO:0009653,GO:0009987,GO:0010623,GO:0010941,GO:0010942,GO:0012501,GO:0014021,GO:…
GSADVT00005345001	6mA	GO:0000139,GO:0000166,GO:0000935,GO:0001558,GO:0001882,GO:0001883,GO:0003674,GO:0003824,GO:0003924,GO:0005488,GO:0005525,GO:0005575,GO:0005886,GO:0005938,GO:0006810,GO:0006886,GO:0006888,GO:0007165,GO:0007264,GO:0008104,GO:0008150,GO:0015031,GO:0016020,GO:0016192,GO:0016462,GO:0016482,GO:0016787,GO:0016817,GO:0016818,GO:0017076,GO:0017111,GO:0019001,GO:0022603,GO:0022604,GO:0030307,GO:0030428,GO:…
GSADVT00050056001	6mA	GO:0000139,GO:0000166,GO:0001745,GO:0001882,GO:0001883,GO:0003006,GO:0003674,GO:0003824,GO:0003924,GO:0005488,GO:0005525,GO:0005575,GO:0005794,GO:0006403,GO:0006810,GO:0006887,GO:0006890,GO:0006891,GO:0006928,GO:0006950,GO:0006952,GO:0007017,GO:0007165,GO:0007264,GO:0007265,GO:0007293,GO:0007316,GO:0007411,GO:0008103,GO:0008104,GO:0008150,GO:0008298,GO:0009605,GO:0009607,GO:0009620,GO:0009653,GO:…
GSADVT00001745001	6mA	GO:0000139,GO:0000166,GO:0001882,GO:0001883,GO:0003674,GO:0003824,GO:0003924,GO:0005488,GO:0005525,GO:0005575,GO:0005768,GO:0005802,GO:0006810,GO:0006892,GO:0006895,GO:0006950,GO:0006952,GO:0006996,GO:0007165,GO:0007166,GO:0007167,GO:0007169,GO:0007264,GO:0008104,GO:0008150,GO:0008543,GO:0009605,GO:0009607,GO:0009617,GO:0009790,GO:0009987,GO:0010008,GO:0012506,GO:0015031,GO:0016020,GO:0016023,GO:…
GSADVT00002563001	6mA	GO:0000139,GO:0000166,GO:0001882,GO:0001883,GO:0003674,GO:0003824,GO:0003924,GO:0005488,GO:0005525,GO:0005575,GO:0006810,GO:0006886,GO:0006887,GO:0006892,GO:0006893,GO:0007009,GO:0007165,GO:0007264,GO:0008104,GO:0008150,GO:0009987,GO:0012506,GO:0015031,GO:0016020,GO:0016043,GO:0016192,GO:0016462,GO:0016482,GO:0016787,GO:0016817,GO:0016818,GO:0017076,GO:0017111,GO:0017157,GO:0019001,GO:0019002,GO:…
GSADVT00007246001	6mA	GO:0000139,GO:0000166,GO:0001882,GO:0001883,GO:0003674,GO:0003824,GO:0004430,GO:0005488,GO:0005524,GO:0005575,GO:0005886,GO:0007165,GO:0008150,GO:0012506,GO:0016020,GO:0016301,GO:0016740,GO:0016772,GO:0016773,GO:0017076,GO:0030554,GO:0030659,GO:0030660,GO:0031090,GO:0032549,GO:0032550,GO:0032553,GO:0032555,GO:0032559,GO:0035556,GO:0035639,GO:0036094,GO:0043167,GO:0043168,GO:0044422,GO:0044424,GO:…
GSADVT00008917001	6mA	GO:0000139,GO:0001726,GO:0003674,GO:0003824,GO:0004439,GO:0004445,GO:0005575,GO:0005737,GO:0005856,GO:0005886,GO:0005930,GO:0006629,GO:0006644,GO:0006650,GO:0006793,GO:0006796,GO:0008150,GO:0008152,GO:0009987,GO:0010720,GO:0010975,GO:0010976,GO:0016020,GO:0016311,GO:0016787,GO:0016788,GO:0016791,GO:0019637,GO:0030258,GO:0031090,GO:0031344,GO:0031346,GO:0032580,GO:0034593,GO:0034595,GO:0042578,GO:…
GSADVT00001107001	6mA	GO:0000139,GO:0002063,GO:0003002,GO:0003674,GO:0003824,GO:0005488,GO:0005575,GO:0005576,GO:0006022,GO:0006023,GO:0006024,GO:0006082,GO:0006790,GO:0006807,GO:0007389,GO:0008150,GO:0008152,GO:0008194,GO:0008376,GO:0008589,GO:0009058,GO:0009059,GO:0009605,GO:0009653,GO:0009887,GO:0009954,GO:0009966,GO:0009967,GO:0009987,GO:0009991,GO:0010646,GO:0010647,GO:0015020,GO:0016020,GO:0016021,GO:0016740,GO:…
GSADVT00015954001	6mA	GO:0000139,GO:0002230,GO:0002682,GO:0002697,GO:0002831,GO:0005575,GO:0005739,GO:0006810,GO:0008150,GO:0009987,GO:0016020,GO:0016021,GO:0031090,GO:0031224,GO:0031347,GO:0032101,GO:0043226,GO:0043227,GO:0043229,GO:0043231,GO:0043900,GO:0044422,GO:0044424,GO:0044425,GO:0044431,GO:0044444,GO:0044446,GO:0044464,GO:0044699,GO:0044763,GO:0044765,GO:0048583,GO:0050688,GO:0050691,GO:0050789,GO:0051179,GO:…
GSADVT00009276001	6mA	GO:0000139,GO:0003674,GO:0003824,GO:0003945,GO:0005488,GO:0005575,GO:0005975,GO:0006022,GO:0006023,GO:0006024,GO:0006082,GO:0006464,GO:0006486,GO:0006487,GO:0006629,GO:0006643,GO:0006790,GO:0006807,GO:0008150,GO:0008152,GO:0008194,GO:0008378,GO:0009058,GO:0009059,GO:0009987,GO:0016020,GO:0016021,GO:0016740,GO:0016757,GO:0016758,GO:0018146,GO:0018193,GO:0018196,GO:0018279,GO:0019538,GO:0030203,GO:…
GSADVT00008677001	6mA	GO:0000139,GO:0003674,GO:0003824,GO:0004126,GO:0005488,GO:0005543,GO:0005575,GO:0005622,GO:0005737,GO:0005789,GO:0005811,GO:0006139,GO:0006213,GO:0006216,GO:0006725,GO:0006807,GO:0006810,GO:0008104,GO:0008150,GO:0008152,GO:0008270,GO:0008289,GO:0009056,GO:0009116,GO:0009119,GO:0009164,GO:0009972,GO:0009987,GO:0015031,GO:0016020,GO:0016787,GO:0016810,GO:0016814,GO:0019239,GO:0019439,GO:0030496,GO:…
GSADVT00017388001	6mA	GO:0000139,GO:0003674,GO:0003824,GO:0004871,GO:0005215,GO:0005488,GO:0005515,GO:0005575,GO:0005737,GO:0005794,GO:0006464,GO:0006497,GO:0006810,GO:0007165,GO:0008104,GO:0008150,GO:0008152,GO:0008270,GO:0008324,GO:0009966,GO:0009967,GO:0009987,GO:0010646,GO:0010647,GO:0012506,GO:0015031,GO:0015075,GO:0015095,GO:0016020,GO:0016021,GO:0016409,GO:0016417,GO:0016740,GO:0016746,GO:0016747,GO:0018345,GO:…
GSADVT00009360001	6mA	GO:0000139,GO:0003674,GO:0003824,GO:0005488,GO:0005575,GO:0005975,GO:0006464,GO:0006486,GO:0008150,GO:0008152,GO:0009987,GO:0016020,GO:0016021,GO:0016740,GO:0016757,GO:0019538,GO:0030246,GO:0031090,GO:0031224,GO:0036211,GO:0043167,GO:0043169,GO:0043170,GO:0043412,GO:0043413,GO:0044237,GO:0044238,GO:0044260,GO:0044267,GO:0044422,GO:0044424,GO:0044425,GO:0044431,GO:0044444,GO:0044446,GO:0044464,GO:…
GSADVT00019891001	6mA	GO:0000139,GO:0003674,GO:0003824,GO:0005488,GO:0005575,GO:0005975,GO:0006464,GO:0006486,GO:0008150,GO:0008152,GO:0009987,GO:0016020,GO:0016021,GO:0016740,GO:0016757,GO:0019538,GO:0030246,GO:0031090,GO:0031224,GO:0036211,GO:0043167,GO:0043169,GO:0043170,GO:0043412,GO:0043413,GO:0044237,GO:0044238,GO:0044260,GO:0044267,GO:0044422,GO:0044424,GO:0044425,GO:0044431,GO:0044444,GO:0044446,GO:0044464,GO:…
GSADVT00016763001	6mA	GO:0000139,GO:0003674,GO:0003824,GO:0005575,GO:0005789,GO:0005975,GO:0005996,GO:0006022,GO:0006023,GO:0006024,GO:0006029,GO:0006082,GO:0006790,GO:0006807,GO:0008150,GO:0008152,GO:0008194,GO:0008375,GO:0009058,GO:0009059,GO:0009100,GO:0009101,GO:0009987,GO:0015012,GO:0016020,GO:0016021,GO:0016740,GO:0016757,GO:0016758,GO:0016763,GO:0019321,GO:0019538,GO:0030158,GO:0030166,GO:0030201,GO:0030203,GO:…
GSADVT00012665001	6mA	GO:0000139,GO:0003674,GO:0003824,GO:0005575,GO:0005975,GO:0006464,GO:0006486,GO:0008150,GO:0008152,GO:0008194,GO:0008378,GO:0009987,GO:0016020,GO:0016021,GO:0016740,GO:0016757,GO:0016758,GO:0019538,GO:0031090,GO:0031224,GO:0035250,GO:0036211,GO:0043170,GO:0043412,GO:0043413,GO:0044237,GO:0044238,GO:0044260,GO:0044267,GO:0044422,GO:0044424,GO:0044425,GO:0044431,GO:0044444,GO:0044446,GO:0044464,GO:…
GSADVT00013366001	6mA	GO:0000139,GO:0003674,GO:0003824,GO:0005575,GO:0005975,GO:0006464,GO:0006486,GO:0008150,GO:0008152,GO:0008417,GO:0009987,GO:0016020,GO:0016021,GO:0016740,GO:0016757,GO:0016758,GO:0017060,GO:0019538,GO:0031090,GO:0031224,GO:0032580,GO:0036211,GO:0043170,GO:0043412,GO:0043413,GO:0044237,GO:0044238,GO:0044260,GO:0044267,GO:0044422,GO:0044424,GO:0044425,GO:0044431,GO:0044444,GO:0044446,GO:0044464,GO:…
GSADVT00031763001	6mA	GO:0000139,GO:0003674,GO:0005215,GO:0005216,GO:0005244,GO:0005253,GO:0005575,GO:0006810,GO:0006873,GO:0006885,GO:0008104,GO:0008150,GO:0008308,GO:0008509,GO:0009987,GO:0012506,GO:0015031,GO:0015075,GO:0015267,GO:0016020,GO:0016021,GO:0019725,GO:0022803,GO:0022832,GO:0022836,GO:0022838,GO:0022857,GO:0022891,GO:0022892,GO:0030003,GO:0030004,GO:0030641,GO:0030659,GO:0030660,GO:0031090,GO:0031224,GO:…
GSADVT00013865001	6mA	GO:0000139,GO:0003674,GO:0005215,GO:0005575,GO:0005634,GO:0005789,GO:0006464,GO:0006497,GO:0006505,GO:0006506,GO:0006629,GO:0006643,GO:0006644,GO:0006650,GO:0006661,GO:0006664,GO:0006793,GO:0006796,GO:0006810,GO:0006950,GO:0006974,GO:0007165,GO:0008104,GO:0008150,GO:0008152,GO:0008565,GO:0008610,GO:0008630,GO:0008654,GO:0009058,GO:0009247,GO:0009966,GO:0009968,GO:0009987,GO:0010646,GO:0010648,GO:…
GSADVT00013347001	6mA	GO:0000139,GO:0003674,GO:0005215,GO:0005575,GO:0005795,GO:0005829,GO:0006810,GO:0006891,GO:0006996,GO:0007030,GO:0008150,GO:0008565,GO:0009987,GO:0016020,GO:0016043,GO:0016192,GO:0017119,GO:0022892,GO:0031090,GO:0032991,GO:0043234,GO:0044422,GO:0044424,GO:0044431,GO:0044444,GO:0044446,GO:0044464,GO:0044699,GO:0044765,GO:0046907,GO:0048193,GO:0051179,GO:0051234,GO:0051649,GO:0071840,GO:0098588,GO:…
GSADVT00014683001	6mA	GO:0000139,GO:0003674,GO:0005488,GO:0005515,GO:0005575,GO:0008150,GO:0009893,GO:0009966,GO:0009967,GO:0010562,GO:0010632,GO:0010634,GO:0010646,GO:0010647,GO:0010717,GO:0010718,GO:0010720,GO:0010769,GO:0010770,GO:0016020,GO:0019220,GO:0019222,GO:0022603,GO:0022604,GO:0023051,GO:0023056,GO:0030334,GO:0030335,GO:0031090,GO:0031323,GO:0031325,GO:0031982,GO:0031988,GO:0032879,GO:0040012,GO:0040017,GO:…
GSADVT00009683001	6mA	GO:0000139,GO:0005575,GO:0005789,GO:0005798,GO:0005886,GO:0006810,GO:0006890,GO:0006900,GO:0006996,GO:0008104,GO:0008150,GO:0009987,GO:0012506,GO:0015031,GO:0016020,GO:0016021,GO:0016023,GO:0016043,GO:0016050,GO:0016192,GO:0019222,GO:0030133,GO:0030135,GO:0030136,GO:0030137,GO:0030140,GO:0030658,GO:0030659,GO:0030667,GO:0031090,GO:0031224,GO:0031323,GO:0031410,GO:0031982,GO:0031988,GO:0032991,GO:…
GSADVT00062914001	6mA	GO:0000139,GO:0005575,GO:0006810,GO:0006891,GO:0008104,GO:0008150,GO:0015031,GO:0016020,GO:0016192,GO:0017119,GO:0031090,GO:0032991,GO:0033036,GO:0043234,GO:0044422,GO:0044424,GO:0044431,GO:0044444,GO:0044446,GO:0044464,GO:0044699,GO:0044765,GO:0045184,GO:0046907,GO:0048193,GO:0051179,GO:0051234,GO:0051649,GO:0071702,GO:0098588,GO:1902578,GO:1902582
GSADVT00021910001	6mA	GO:0000139,GO:0005575,GO:0010008,GO:0016020,GO:0016021,GO:0031090,GO:0031224,GO:0044422,GO:0044424,GO:0044425,GO:0044431,GO:0044440,GO:0044444,GO:0044446,GO:0044464,GO:0098588
GSADVT00003600001	6mA	GO:0000146,GO:0000166,GO:0001750,GO:0001882,GO:0001883,GO:0001917,GO:0003008,GO:0003674,GO:0003774,GO:0003824,GO:0004672,GO:0004674,GO:0005488,GO:0005524,GO:0005575,GO:0005737,GO:0005929,GO:0006464,GO:0006468,GO:0006793,GO:0006796,GO:0007600,GO:0007601,GO:0008150,GO:0008152,GO:0009987,GO:0016301,GO:0016310,GO:0016459,GO:0016462,GO:0016740,GO:0016772,GO:0016773,GO:0016787,GO:0016817,GO:0016818,GO:…
GSADVT00056477001	6mA	GO:0000146,GO:0000166,GO:0001882,GO:0001883,GO:0001917,GO:0003008,GO:0003674,GO:0003774,GO:0003824,GO:0004672,GO:0004674,GO:0005215,GO:0005216,GO:0005230,GO:0005488,GO:0005515,GO:0005516,GO:0005524,GO:0005575,GO:0005737,GO:0006464,GO:0006468,GO:0006793,GO:0006796,GO:0006810,GO:0006811,GO:0007600,GO:0007601,GO:0007605,GO:0008150,GO:0008152,GO:0009987,GO:0015075,GO:0015267,GO:0015276,GO:0016020,GO:…
GSADVT00006062001	6mA	GO:0000149,GO:0000281,GO:0000910,GO:0001505,GO:0003674,GO:0005484,GO:0005488,GO:0005515,GO:0005575,GO:0005886,GO:0006810,GO:0006836,GO:0006886,GO:0006904,GO:0006906,GO:0006996,GO:0007154,GO:0007267,GO:0007268,GO:0007269,GO:0007274,GO:0007317,GO:0007349,GO:0007482,GO:0008021,GO:0008104,GO:0008150,GO:0009987,GO:0012505,GO:0015031,GO:0016020,GO:0016021,GO:0016023,GO:0016043,GO:0016050,GO:0016081,GO:…
GSADVT00018453001	6mA	GO:0000149,GO:0000323,GO:0001772,GO:0001910,GO:0001912,GO:0001914,GO:0001916,GO:0002682,GO:0002684,GO:0002697,GO:0002699,GO:0002703,GO:0002705,GO:0002706,GO:0002708,GO:0002709,GO:0002711,GO:0002819,GO:0002821,GO:0002822,GO:0002824,GO:0003674,GO:0005484,GO:0005488,GO:0005515,GO:0005575,GO:0005764,GO:0005765,GO:0005766,GO:0005768,GO:0005769,GO:0005770,GO:0005773,GO:0005774,GO:0005886,GO:0006810,GO:…
GSADVT00012596001	6mA	GO:0000149,GO:0001505,GO:0003674,GO:0005198,GO:0005484,GO:0005488,GO:0005515,GO:0005575,GO:0006810,GO:0006836,GO:0006886,GO:0006906,GO:0006996,GO:0007154,GO:0007165,GO:0007166,GO:0007167,GO:0007169,GO:0007267,GO:0007268,GO:0007269,GO:0007271,GO:0007399,GO:0008021,GO:0008104,GO:0008150,GO:0008286,GO:0009987,GO:0012505,GO:0015031,GO:0016020,GO:0016021,GO:0016023,GO:0016043,GO:0016050,GO:0016323,GO:…
GSADVT00008535001	6mA	GO:0000151,GO:0000152,GO:0000209,GO:0001558,GO:0003674,GO:0003676,GO:0003677,GO:0003824,GO:0004842,GO:0005102,GO:0005488,GO:0005515,GO:0005575,GO:0005634,GO:0005680,GO:0005737,GO:0006355,GO:0006464,GO:0006508,GO:0006511,GO:0008150,GO:0008152,GO:0008270,GO:0009056,GO:0009057,GO:0009889,GO:0009891,GO:0009893,GO:0009966,GO:0009987,GO:0010468,GO:0010556,GO:0010557,GO:0010604,GO:0010628,GO:0010646,GO:…
GSADVT00020889001	6mA	GO:0000151,GO:0000152,GO:0000209,GO:0002682,GO:0002694,GO:0003674,GO:0003824,GO:0004842,GO:0005102,GO:0005126,GO:0005128,GO:0005135,GO:0005488,GO:0005515,GO:0005575,GO:0005680,GO:0006355,GO:0006464,GO:0006508,GO:0006914,GO:0007165,GO:0007166,GO:0008150,GO:0008152,GO:0008270,GO:0008285,GO:0009056,GO:0009057,GO:0009889,GO:0009893,GO:0009966,GO:0009987,GO:0010468,GO:0010498,GO:0010556,GO:0010646,GO:…
GSADVT00020901001	6mA	GO:0000151,GO:0000166,GO:0000209,GO:0001882,GO:0001883,GO:0003674,GO:0003824,GO:0004842,GO:0005488,GO:0005524,GO:0005575,GO:0006464,GO:0008150,GO:0008152,GO:0009987,GO:0016567,GO:0016740,GO:0017076,GO:0019538,GO:0019787,GO:0030554,GO:0031982,GO:0031988,GO:0032446,GO:0032549,GO:0032550,GO:0032553,GO:0032555,GO:0032559,GO:0032991,GO:0035639,GO:0036094,GO:0036211,GO:0043167,GO:0043168,GO:0043170,GO:…
GSADVT00011639001	6mA	GO:0000151,GO:0000209,GO:0000323,GO:0001906,GO:0001909,GO:0002228,GO:0002250,GO:0002252,GO:0002376,GO:0002443,GO:0002449,GO:0003674,GO:0003824,GO:0004842,GO:0005488,GO:0005515,GO:0005575,GO:0005737,GO:0005764,GO:0005773,GO:0006464,GO:0006810,GO:0006950,GO:0006952,GO:0006955,GO:0008104,GO:0008150,GO:0008152,GO:0008270,GO:0009306,GO:0009893,GO:0009894,GO:0009896,GO:0009987,GO:0010604,GO:0015031,GO:…
GSADVT00005569001	6mA	GO:0000151,GO:0000209,GO:0003674,GO:0003824,GO:0004842,GO:0005488,GO:0005515,GO:0005575,GO:0005737,GO:0005802,GO:0006464,GO:0006508,GO:0006511,GO:0006810,GO:0006892,GO:0006895,GO:0008104,GO:0008150,GO:0008152,GO:0009056,GO:0009057,GO:0009987,GO:0010033,GO:0010498,GO:0010941,GO:0015031,GO:0016192,GO:0016197,GO:0016482,GO:0016567,GO:0016604,GO:0016605,GO:0016740,GO:0019538,GO:0019787,GO:0019941,GO:…
GSADVT00000885001	6mA	GO:0000151,GO:0000209,GO:0003674,GO:0003824,GO:0004842,GO:0005488,GO:0005515,GO:0005575,GO:0005737,GO:0006464,GO:0008150,GO:0008152,GO:0008270,GO:0009893,GO:0009894,GO:0009896,GO:0009987,GO:0010604,GO:0016567,GO:0016740,GO:0016874,GO:0019222,GO:0019538,GO:0019787,GO:0019899,GO:0030162,GO:0031323,GO:0031325,GO:0031329,GO:0031331,GO:0031624,GO:0032268,GO:0032270,GO:0032434,GO:0032436,GO:0032446,GO:…
GSADVT00015663001	6mA	GO:0000151,GO:0003674,GO:0003824,GO:0004842,GO:0005488,GO:0005515,GO:0005575,GO:0006464,GO:0006508,GO:0006511,GO:0006513,GO:0008150,GO:0008152,GO:0009056,GO:0009057,GO:0009894,GO:0009966,GO:0009987,GO:0010498,GO:0010506,GO:0010646,GO:0014066,GO:0016020,GO:0016567,GO:0016740,GO:0019005,GO:0019222,GO:0019538,GO:0019787,GO:0019941,GO:0023051,GO:0030163,GO:0031146,GO:0031323,GO:0031329,GO:0031461,GO:…
GSADVT00025026001	6mA	GO:0000151,GO:0003674,GO:0005488,GO:0005515,GO:0005575,GO:0006464,GO:0008150,GO:0008152,GO:0009987,GO:0016567,GO:0019538,GO:0031461,GO:0031463,GO:0032446,GO:0032991,GO:0036211,GO:0043170,GO:0043234,GO:0043412,GO:0044237,GO:0044238,GO:0044260,GO:0044267,GO:0044424,GO:0044464,GO:0070647,GO:0071704,GO:1902494,GO:1990234
GSADVT00039877001	6mA	GO:0000159,GO:0000166,GO:0000226,GO:0000413,GO:0001882,GO:0001883,GO:0003674,GO:0003755,GO:0003824,GO:0005488,GO:0005524,GO:0005575,GO:0005634,GO:0005654,GO:0005737,GO:0006464,GO:0006996,GO:0007010,GO:0007017,GO:0007051,GO:0007052,GO:0008047,GO:0008150,GO:0008152,GO:0008160,GO:0008287,GO:0008601,GO:0009892,GO:0009893,GO:0009987,GO:0010562,GO:0010563,GO:0010921,GO:0010922,GO:0010923,GO:0010941,GO:…
GSADVT00020211001	6mA	GO:0000159,GO:0000278,GO:0001700,GO:0003002,GO:0003674,GO:0003824,GO:0004721,GO:0004722,GO:0005575,GO:0005634,GO:0005737,GO:0005829,GO:0005875,GO:0006464,GO:0006470,GO:0006508,GO:0006511,GO:0006793,GO:0006796,GO:0006996,GO:0007017,GO:0007049,GO:0007088,GO:0007091,GO:0007099,GO:0007163,GO:0007165,GO:0007166,GO:0007346,GO:0007389,GO:0007406,GO:0007423,GO:0007447,GO:0008150,GO:0008152,GO:0008285,GO:…
GSADVT00014470001	6mA	GO:0000164,GO:0003674,GO:0005488,GO:0005515,GO:0005575,GO:0005634,GO:0005737,GO:0008150,GO:0008287,GO:0009966,GO:0009967,GO:0010646,GO:0010647,GO:0019899,GO:0019902,GO:0019903,GO:0023051,GO:0023056,GO:0032991,GO:0043226,GO:0043227,GO:0043229,GO:0043231,GO:0043234,GO:0044424,GO:0044444,GO:0044464,GO:0046578,GO:0046579,GO:0048518,GO:0048522,GO:0048583,GO:0048584,GO:0050789,GO:0050794,GO:0051056,GO:…
GSADVT00021477001	6mA	GO:0000165,GO:0000166,GO:0000186,GO:0001505,GO:0001666,GO:0001726,GO:0001763,GO:0001882,GO:0001883,GO:0001932,GO:0001934,GO:0002009,GO:0003008,GO:0003674,GO:0003824,GO:0004672,GO:0004674,GO:0004702,GO:0004709,GO:0004871,GO:0005057,GO:0005488,GO:0005515,GO:0005518,GO:0005524,GO:0005575,GO:0005737,GO:0005794,GO:0005829,GO:0005886,GO:0005911,GO:0005912,GO:0005924,GO:0005925,GO:0006464,GO:0006468,GO:…
GSADVT00037295001	6mA	GO:0000165,GO:0000166,GO:0000186,GO:0001882,GO:0001883,GO:0001890,GO:0001932,GO:0001934,GO:0003006,GO:0003674,GO:0003824,GO:0004672,GO:0004674,GO:0004702,GO:0004709,GO:0004871,GO:0005057,GO:0005488,GO:0005524,GO:0005575,GO:0005737,GO:0006275,GO:0006464,GO:0006468,GO:0006793,GO:0006796,GO:0006950,GO:0007165,GO:0007346,GO:0007530,GO:0007538,GO:0007542,GO:0008150,GO:0008152,GO:0009314,GO:0009411,GO:…
GSADVT00044822001	6mA	GO:0000165,GO:0000166,GO:0001882,GO:0001883,GO:0002009,GO:0002376,GO:0003006,GO:0003008,GO:0003674,GO:0003824,GO:0004672,GO:0004713,GO:0004715,GO:0005488,GO:0005524,GO:0005575,GO:0005737,GO:0005886,GO:0006139,GO:0006259,GO:0006260,GO:0006464,GO:0006468,GO:0006725,GO:0006793,GO:0006796,GO:0006807,GO:0006810,GO:0006950,GO:0006952,GO:0006955,GO:0006996,GO:0007010,GO:0007165,GO:0007166,GO:0007167,GO:…
GSADVT00042460001	6mA	GO:0000165,GO:0000166,GO:0001882,GO:0001883,GO:0003674,GO:0003824,GO:0004672,GO:0004674,GO:0004702,GO:0004707,GO:0004871,GO:0005057,GO:0005488,GO:0005524,GO:0005575,GO:0005622,GO:0006139,GO:0006351,GO:0006355,GO:0006357,GO:0006464,GO:0006468,GO:0006725,GO:0006793,GO:0006796,GO:0006807,GO:0006950,GO:0007165,GO:0008150,GO:0008152,GO:0009058,GO:0009059,GO:0009889,GO:0009987,GO:0010468,GO:0010556,GO:…
GSADVT00008994001	6mA	GO:0000165,GO:0000188,GO:0001932,GO:0001933,GO:0002237,GO:0002682,GO:0002683,GO:0002697,GO:0002698,GO:0002819,GO:0003674,GO:0003824,GO:0004721,GO:0004725,GO:0005575,GO:0005634,GO:0005654,GO:0005737,GO:0005794,GO:0006464,GO:0006469,GO:0006470,GO:0006793,GO:0006796,GO:0006950,GO:0007165,GO:0007254,GO:0008138,GO:0008150,GO:0008152,GO:0009605,GO:0009607,GO:0009892,GO:0009966,GO:0009968,GO:0009987,GO:…
GSADVT00057238001	6mA	GO:0000166,GO:0000209,GO:0001882,GO:0001883,GO:0003674,GO:0003824,GO:0004842,GO:0005488,GO:0005524,GO:0005575,GO:0005634,GO:0005737,GO:0006464,GO:0008150,GO:0008152,GO:0009987,GO:0016567,GO:0016740,GO:0017076,GO:0019538,GO:0019787,GO:0030554,GO:0032446,GO:0032549,GO:0032550,GO:0032553,GO:0032555,GO:0032559,GO:0035639,GO:0036094,GO:0036211,GO:0040008,GO:0043167,GO:0043168,GO:0043170,GO:0043226,GO:…
GSADVT00002070001	6mA	GO:0000166,GO:0000209,GO:0001882,GO:0001883,GO:0003674,GO:0003824,GO:0004842,GO:0005488,GO:0005524,GO:0006464,GO:0008150,GO:0008152,GO:0009987,GO:0016567,GO:0016740,GO:0017076,GO:0019538,GO:0019787,GO:0030554,GO:0032446,GO:0032549,GO:0032550,GO:0032553,GO:0032555,GO:0032559,GO:0035639,GO:0036094,GO:0036211,GO:0043167,GO:0043168,GO:0043170,GO:0043412,GO:0044237,GO:0044238,GO:0044260,GO:0044267,GO:…
GSADVT00026165001	6mA	GO:0000166,GO:0000226,GO:0000910,GO:0000922,GO:0001558,GO:0001882,GO:0001883,GO:0003674,GO:0005488,GO:0005525,GO:0005575,GO:0005739,GO:0005768,GO:0005770,GO:0005771,GO:0005802,GO:0005813,GO:0005815,GO:0005828,GO:0005874,GO:0005876,GO:0005886,GO:0006461,GO:0006810,GO:0006887,GO:0006996,GO:0007009,GO:0007010,GO:0007017,GO:0007032,GO:0007051,GO:0007052,GO:0007080,GO:0007165,GO:0007264,GO:0007346,GO:…
GSADVT00023458001	6mA	GO:0000166,GO:0000226,GO:0001882,GO:0001883,GO:0003341,GO:0003674,GO:0003676,GO:0003723,GO:0003774,GO:0003777,GO:0003824,GO:0005488,GO:0005515,GO:0005524,GO:0005575,GO:0005737,GO:0005813,GO:0005815,GO:0005868,GO:0005874,GO:0005875,GO:0006810,GO:0006928,GO:0006996,GO:0007010,GO:0007017,GO:0007018,GO:0008150,GO:0009987,GO:0016020,GO:0016043,GO:0016462,GO:0016787,GO:0016817,GO:0016818,GO:0016887,GO:…
GSADVT00029299001	6mA	GO:0000166,GO:0000228,GO:0000793,GO:0000794,GO:0001701,GO:0001756,GO:0001882,GO:0001883,GO:0001932,GO:0002020,GO:0003002,GO:0003007,GO:0003008,GO:0003012,GO:0003300,GO:0003674,GO:0003779,GO:0003824,GO:0004672,GO:0004674,GO:0004713,GO:0005198,GO:0005200,GO:0005488,GO:0005509,GO:0005515,GO:0005516,GO:0005524,GO:0005575,GO:0005694,GO:0005859,GO:0005865,GO:0006461,GO:0006464,GO:0006468,GO:0006793,GO:…
GSADVT00017119001	6mA	GO:0000166,GO:0000280,GO:0001882,GO:0001883,GO:0003674,GO:0003824,GO:0004672,GO:0004674,GO:0005488,GO:0005524,GO:0005575,GO:0005634,GO:0005795,GO:0006464,GO:0006468,GO:0006793,GO:0006796,GO:0006996,GO:0007030,GO:0007067,GO:0008150,GO:0008152,GO:0009987,GO:0016043,GO:0016301,GO:0016310,GO:0016740,GO:0016772,GO:0016773,GO:0017076,GO:0018105,GO:0018193,GO:0018209,GO:0019538,GO:0022402,GO:0022411,GO:…
GSADVT00007751001	6mA	GO:0000166,GO:0000280,GO:0003006,GO:0003674,GO:0003676,GO:0003723,GO:0005488,GO:0005575,GO:0005777,GO:0006996,GO:0007126,GO:0007143,GO:0007276,GO:0007281,GO:0007292,GO:0008150,GO:0009892,GO:0009987,GO:0010468,GO:0010563,GO:0010921,GO:0010923,GO:0016043,GO:0019220,GO:0019222,GO:0022412,GO:0022414,GO:0031323,GO:0031324,GO:0032502,GO:0035303,GO:0035305,GO:0036094,GO:0042579,GO:0043086,GO:0043226,GO:…
GSADVT00011420001	6mA	GO:0000166,GO:0000287,GO:0001882,GO:0001883,GO:0003674,GO:0003824,GO:0004672,GO:0004674,GO:0005488,GO:0005524,GO:0005575,GO:0005737,GO:0006464,GO:0006468,GO:0006793,GO:0006796,GO:0007165,GO:0007275,GO:0007276,GO:0007283,GO:0008150,GO:0008152,GO:0009987,GO:0016301,GO:0016310,GO:0016740,GO:0016772,GO:0016773,GO:0017076,GO:0019538,GO:0022414,GO:0030154,GO:0030554,GO:0032501,GO:0032502,GO:0032549,GO:…
GSADVT00024396001	6mA	GO:0000166,GO:0000287,GO:0001882,GO:0001883,GO:0003674,GO:0003824,GO:0004672,GO:0004674,GO:0005488,GO:0005524,GO:0005575,GO:0005737,GO:0006464,GO:0006468,GO:0006793,GO:0006796,GO:0007165,GO:0008150,GO:0008152,GO:0009987,GO:0016301,GO:0016310,GO:0016740,GO:0016772,GO:0016773,GO:0017076,GO:0019538,GO:0030554,GO:0032549,GO:0032550,GO:0032553,GO:0032555,GO:0032559,GO:0035556,GO:0035639,GO:0036094,GO:…
GSADVT00008542001	6mA	GO:0000166,GO:0000302,GO:0001666,GO:0001882,GO:0001883,GO:0003674,GO:0003824,GO:0004383,GO:0005488,GO:0005515,GO:0005525,GO:0005575,GO:0005886,GO:0006139,GO:0006163,GO:0006164,GO:0006182,GO:0006725,GO:0006753,GO:0006793,GO:0006796,GO:0006807,GO:0006950,GO:0006979,GO:0007165,GO:0008074,GO:0008150,GO:0008152,GO:0009058,GO:0009117,GO:0009150,GO:0009152,GO:0009165,GO:0009187,GO:0009190,GO:0009259,GO:…
GSADVT00018537001	6mA	GO:0000166,GO:0000306,GO:0000323,GO:0000421,GO:0001882,GO:0001883,GO:0001894,GO:0003674,GO:0003824,GO:0003924,GO:0005488,GO:0005515,GO:0005525,GO:0005575,GO:0005764,GO:0005768,GO:0005770,GO:0005773,GO:0005774,GO:0005794,GO:0005811,GO:0006605,GO:0006622,GO:0006623,GO:0006810,GO:0006873,GO:0006885,GO:0006886,GO:0006906,GO:0006996,GO:0007034,GO:0007041,GO:0007165,GO:0007174,GO:0007264,GO:0008104,GO:…
GSADVT00046926001	6mA	GO:0000166,GO:0000309,GO:0001882,GO:0001883,GO:0003674,GO:0003824,GO:0004515,GO:0005488,GO:0005524,GO:0005575,GO:0005634,GO:0005654,GO:0006082,GO:0006139,GO:0006520,GO:0006531,GO:0006725,GO:0006732,GO:0006733,GO:0006753,GO:0006766,GO:0006767,GO:0006793,GO:0006796,GO:0006807,GO:0008150,GO:0008152,GO:0009058,GO:0009066,GO:0009108,GO:0009117,GO:0009165,GO:0009435,GO:0009987,GO:0016740,GO:0016772,GO:…
GSADVT00014748001	6mA	GO:0000166,GO:0000339,GO:0000340,GO:0002252,GO:0002376,GO:0003674,GO:0003676,GO:0003723,GO:0003729,GO:0005488,GO:0005575,GO:0005634,GO:0005737,GO:0006139,GO:0006370,GO:0006396,GO:0006397,GO:0006725,GO:0006807,GO:0006810,GO:0006950,GO:0006952,GO:0008150,GO:0008152,GO:0009452,GO:0009605,GO:0009607,GO:0009615,GO:0009987,GO:0015931,GO:0016070,GO:0016071,GO:0032991,GO:0034518,GO:0034641,GO:0036094,GO:…
GSADVT00000380001	6mA	GO:0000166,GO:0000375,GO:0000377,GO:0000398,GO:0000781,GO:0003674,GO:0003676,GO:0003723,GO:0005488,GO:0005575,GO:0005634,GO:0006139,GO:0006396,GO:0006397,GO:0006725,GO:0006807,GO:0007044,GO:0008150,GO:0008152,GO:0008380,GO:0009987,GO:0016043,GO:0016070,GO:0016071,GO:0022607,GO:0030529,GO:0031581,GO:0032991,GO:0034329,GO:0034330,GO:0034641,GO:0036094,GO:0043170,GO:0043226,GO:0043227,GO:0043229,GO:…
GSADVT00038935001	6mA	GO:0000166,GO:0000381,GO:0003674,GO:0003676,GO:0003723,GO:0003729,GO:0005488,GO:0005575,GO:0005634,GO:0005737,GO:0006139,GO:0006396,GO:0006397,GO:0006725,GO:0006807,GO:0008150,GO:0008152,GO:0008380,GO:0009987,GO:0010468,GO:0016070,GO:0016071,GO:0019219,GO:0019222,GO:0031323,GO:0034641,GO:0036094,GO:0043170,GO:0043226,GO:0043227,GO:0043229,GO:0043231,GO:0043484,GO:0044237,GO:0044238,GO:0044260,GO:…
GSADVT00019935001	6mA	GO:0000166,GO:0000502,GO:0001882,GO:0001883,GO:0003674,GO:0003824,GO:0005488,GO:0005515,GO:0005524,GO:0005575,GO:0005829,GO:0005886,GO:0006355,GO:0006357,GO:0006508,GO:0006511,GO:0007276,GO:0007292,GO:0008134,GO:0008150,GO:0008152,GO:0008540,GO:0009056,GO:0009057,GO:0009889,GO:0009891,GO:0009893,GO:0009894,GO:0009896,GO:0009987,GO:0010074,GO:0010078,GO:0010468,GO:0010498,GO:0010556,GO:0010557,GO:…
GSADVT00004453001	6mA	GO:0000166,GO:0000733,GO:0001882,GO:0001883,GO:0003674,GO:0003676,GO:0003677,GO:0003678,GO:0003824,GO:0004003,GO:0004386,GO:0005488,GO:0005524,GO:0005575,GO:0005634,GO:0005654,GO:0006139,GO:0006259,GO:0006281,GO:0006310,GO:0006725,GO:0006807,GO:0006950,GO:0006974,GO:0006996,GO:0008026,GO:0008094,GO:0008150,GO:0008152,GO:0009987,GO:0016020,GO:0016043,GO:0016462,GO:0016787,GO:0016817,GO:0016818,GO:…
GSADVT00014910001	6mA	GO:0000166,GO:0000795,GO:0001505,GO:0001882,GO:0001883,GO:0003674,GO:0003824,GO:0005488,GO:0005515,GO:0005524,GO:0005575,GO:0005794,GO:0005829,GO:0006810,GO:0006836,GO:0007269,GO:0008150,GO:0009987,GO:0010646,GO:0014069,GO:0016020,GO:0017076,GO:0019899,GO:0019900,GO:0019901,GO:0023051,GO:0023061,GO:0030054,GO:0030424,GO:0030425,GO:0030554,GO:0030672,GO:0031090,GO:0032549,GO:0032550,GO:0032553,GO:…
GSADVT00009095001	6mA	GO:0000166,GO:0000902,GO:0000904,GO:0001101,GO:0001525,GO:0001569,GO:0001570,GO:0001763,GO:0001817,GO:0001819,GO:0001882,GO:0001883,GO:0001932,GO:0001934,GO:0001935,GO:0001936,GO:0001952,GO:0001954,GO:0002009,GO:0002040,GO:0002682,GO:0002684,GO:0002697,GO:0002699,GO:0002700,GO:0002702,GO:0002718,GO:0002720,GO:0002739,GO:0002741,GO:0003674,GO:0003824,GO:0004672,GO:0004713,GO:0004714,GO:0004871,GO:…
GSADVT00008959001	6mA	GO:0000166,GO:0000902,GO:0001882,GO:0001883,GO:0001932,GO:0001934,GO:0003674,GO:0005488,GO:0005524,GO:0005575,GO:0005788,GO:0005793,GO:0005886,GO:0005912,GO:0005924,GO:0005925,GO:0006508,GO:0006810,GO:0006950,GO:0006983,GO:0006984,GO:0006987,GO:0007154,GO:0007165,GO:0008150,GO:0008152,GO:0008180,GO:0009267,GO:0009605,GO:0009607,GO:0009653,GO:0009893,GO:0009966,GO:0009968,GO:0009986,GO:0009987,GO:…
GSADVT00003702001	6mA	GO:0000166,GO:0000902,GO:0001882,GO:0001883,GO:0003674,GO:0005488,GO:0005524,GO:0005575,GO:0005634,GO:0005743,GO:0005758,GO:0005759,GO:0005829,GO:0006457,GO:0008150,GO:0008152,GO:0009653,GO:0009987,GO:0016020,GO:0016043,GO:0017076,GO:0019538,GO:0019866,GO:0030554,GO:0031090,GO:0031966,GO:0031970,GO:0031974,GO:0032502,GO:0032549,GO:0032550,GO:0032553,GO:0032555,GO:0032559,GO:0032989,GO:0035639,GO:…
GSADVT00000620001	6mA	GO:0000166,GO:0000988,GO:0000989,GO:0001882,GO:0001883,GO:0003674,GO:0003676,GO:0003712,GO:0003714,GO:0003723,GO:0003724,GO:0003824,GO:0004004,GO:0004386,GO:0005102,GO:0005488,GO:0005515,GO:0005524,GO:0005575,GO:0005634,GO:0005730,GO:0006139,GO:0006351,GO:0006355,GO:0006396,GO:0006725,GO:0006807,GO:0008026,GO:0008150,GO:0008152,GO:0008186,GO:0009058,GO:0009059,GO:0009889,GO:0009890,GO:0009892,GO:…
GSADVT00034980001	6mA	GO:0000166,GO:0001101,GO:0001882,GO:0001883,GO:0003674,GO:0003824,GO:0005215,GO:0005488,GO:0005524,GO:0005575,GO:0005886,GO:0006810,GO:0006869,GO:0006950,GO:0006970,GO:0008150,GO:0008152,GO:0009058,GO:0009628,GO:0009651,GO:0009719,GO:0009725,GO:0009737,GO:0009987,GO:0010025,GO:0010033,GO:0010166,GO:0015399,GO:0015405,GO:0016020,GO:0016021,GO:0016462,GO:0016787,GO:0016817,GO:0016818,GO:0016820,GO:…
GSADVT00015666001	6mA	GO:0000166,GO:0001653,GO:0001882,GO:0001883,GO:0003008,GO:0003013,GO:0003018,GO:0003674,GO:0003824,GO:0004383,GO:0004672,GO:0004871,GO:0004872,GO:0005488,GO:0005524,GO:0005525,GO:0005575,GO:0005886,GO:0006139,GO:0006140,GO:0006163,GO:0006164,GO:0006182,GO:0006464,GO:0006468,GO:0006584,GO:0006725,GO:0006753,GO:0006793,GO:0006796,GO:0006807,GO:0007165,GO:0007166,GO:0007167,GO:0007168,GO:0008074,GO:…
GSADVT00031779001	6mA	GO:0000166,GO:0001654,GO:0001882,GO:0001883,GO:0003002,GO:0003006,GO:0003008,GO:0003674,GO:0003824,GO:0004672,GO:0004674,GO:0004690,GO:0004691,GO:0005488,GO:0005524,GO:0005575,GO:0005737,GO:0005886,GO:0005952,GO:0006355,GO:0006464,GO:0006468,GO:0006793,GO:0006796,GO:0007017,GO:0007165,GO:0007228,GO:0007276,GO:0007281,GO:0007292,GO:0007309,GO:0007314,GO:0007317,GO:0007389,GO:0007423,GO:0007447,GO:…
GSADVT00051050001	6mA	GO:0000166,GO:0001664,GO:0001882,GO:0001883,GO:0003674,GO:0003824,GO:0004672,GO:0004713,GO:0004714,GO:0004871,GO:0004872,GO:0004888,GO:0005102,GO:0005109,GO:0005488,GO:0005515,GO:0005524,GO:0005575,GO:0005634,GO:0005737,GO:0005886,GO:0005887,GO:0006464,GO:0006468,GO:0006793,GO:0006796,GO:0006928,GO:0006935,GO:0007165,GO:0007166,GO:0007409,GO:0007411,GO:0008150,GO:0008152,GO:0008283,GO:0009653,GO:…
GSADVT00007782001	6mA	GO:0000166,GO:0001676,GO:0001882,GO:0001883,GO:0003674,GO:0003824,GO:0004467,GO:0005488,GO:0005524,GO:0005575,GO:0005739,GO:0005741,GO:0005789,GO:0006082,GO:0006629,GO:0006631,GO:0006644,GO:0006793,GO:0006796,GO:0006810,GO:0006811,GO:0006820,GO:0006869,GO:0007584,GO:0008150,GO:0008152,GO:0008610,GO:0008654,GO:0009058,GO:0009605,GO:0009719,GO:0009725,GO:0009743,GO:0009744,GO:0009746,GO:0009749,GO:…
GSADVT00038992001	6mA	GO:0000166,GO:0001701,GO:0001882,GO:0001883,GO:0001890,GO:0003006,GO:0003674,GO:0003824,GO:0004305,GO:0005488,GO:0005524,GO:0006629,GO:0006644,GO:0006646,GO:0006650,GO:0006793,GO:0006796,GO:0008150,GO:0008152,GO:0008610,GO:0008654,GO:0009058,GO:0009790,GO:0009791,GO:0009792,GO:0009987,GO:0016301,GO:0016310,GO:0016740,GO:0016772,GO:0016773,GO:0017076,GO:0019637,GO:0022414,GO:0030554,GO:0032501,GO:…
GSADVT00001131001	6mA	GO:0000166,GO:0001708,GO:0001709,GO:0001882,GO:0001883,GO:0003674,GO:0005102,GO:0005112,GO:0005488,GO:0005515,GO:0005524,GO:0005575,GO:0005634,GO:0005737,GO:0005938,GO:0006928,GO:0007165,GO:0007166,GO:0007219,GO:0007400,GO:0007405,GO:0007417,GO:0007419,GO:0007422,GO:0007507,GO:0007610,GO:0007622,GO:0008104,GO:0008150,GO:0008283,GO:0008347,GO:0008356,GO:0008593,GO:0009786,GO:0009888,GO:0009966,GO:…
GSADVT00018530001	6mA	GO:0000166,GO:0001708,GO:0001709,GO:0001882,GO:0001883,GO:0003674,GO:0005102,GO:0005112,GO:0005488,GO:0005515,GO:0005524,GO:0005575,GO:0005634,GO:0005737,GO:0005938,GO:0006928,GO:0007165,GO:0007166,GO:0007219,GO:0007400,GO:0007405,GO:0007417,GO:0007419,GO:0007422,GO:0007507,GO:0007610,GO:0007622,GO:0008104,GO:0008150,GO:0008283,GO:0008347,GO:0008356,GO:0008593,GO:0009786,GO:0009888,GO:0009966,GO:…
GSADVT00010840001	6mA	GO:0000166,GO:0001726,GO:0001882,GO:0001883,GO:0003674,GO:0003824,GO:0003924,GO:0005488,GO:0005525,GO:0005575,GO:0005829,GO:0005886,GO:0006810,GO:0006897,GO:0007165,GO:0007264,GO:0008104,GO:0008150,GO:0010008,GO:0015031,GO:0016020,GO:0016023,GO:0016192,GO:0016462,GO:0016787,GO:0016817,GO:0016818,GO:0017076,GO:0017111,GO:0019001,GO:0019003,GO:0031090,GO:0031410,GO:0031901,GO:0031982,GO:0031988,GO:…
GSADVT00032714001	6mA	GO:0000166,GO:0001775,GO:0001882,GO:0001883,GO:0002576,GO:0003674,GO:0003824,GO:0005215,GO:0005488,GO:0005524,GO:0005575,GO:0005886,GO:0006810,GO:0006887,GO:0007596,GO:0007599,GO:0008150,GO:0008152,GO:0009987,GO:0012506,GO:0015399,GO:0015405,GO:0016020,GO:0016021,GO:0016192,GO:0016323,GO:0016404,GO:0016462,GO:0016491,GO:0016614,GO:0016616,GO:0016787,GO:0016817,GO:0016818,GO:0016820,GO:0016887,GO:…
GSADVT00018591001	6mA	GO:0000166,GO:0001882,GO:0001883,GO:0001887,GO:0003674,GO:0003824,GO:0005488,GO:0005524,GO:0006082,GO:0006520,GO:0006541,GO:0006575,GO:0006807,GO:0006996,GO:0007005,GO:0007049,GO:0007444,GO:0008150,GO:0008152,GO:0008283,GO:0008284,GO:0008652,GO:0009058,GO:0009064,GO:0009069,GO:0009070,GO:0009888,GO:0009892,GO:0009987,GO:0016043,GO:0016053,GO:0016259,GO:0016260,GO:0016301,GO:0016740,GO:0016772,GO:…
GSADVT00009105001	6mA	GO:0000166,GO:0001882,GO:0001883,GO:0001932,GO:0001934,GO:0002376,GO:0003674,GO:0003824,GO:0004672,GO:0004674,GO:0004712,GO:0004713,GO:0004715,GO:0004857,GO:0005095,GO:0005102,GO:0005154,GO:0005488,GO:0005515,GO:0005524,GO:0005575,GO:0005634,GO:0005737,GO:0005768,GO:0005886,GO:0005905,GO:0005912,GO:0006464,GO:0006468,GO:0006521,GO:0006793,GO:0006796,GO:0006810,GO:0006897,GO:0006928,GO:0006950,GO:…
GSADVT00012203001	6mA	GO:0000166,GO:0001882,GO:0001883,GO:0001932,GO:0001934,GO:0003674,GO:0003824,GO:0004385,GO:0005488,GO:0005524,GO:0005575,GO:0005634,GO:0005886,GO:0005911,GO:0005923,GO:0006139,GO:0006163,GO:0006725,GO:0006753,GO:0006793,GO:0006796,GO:0006807,GO:0006915,GO:0007165,GO:0008150,GO:0008152,GO:0008219,GO:0009116,GO:0009117,GO:0009119,GO:0009123,GO:0009126,GO:0009132,GO:0009135,GO:0009150,GO:0009161,GO:…
GSADVT00034530001	6mA	GO:0000166,GO:0001882,GO:0001883,GO:0001932,GO:0001934,GO:0003674,GO:0003824,GO:0004672,GO:0004674,GO:0005488,GO:0005515,GO:0005524,GO:0005575,GO:0005737,GO:0006464,GO:0006468,GO:0006793,GO:0006796,GO:0006915,GO:0006950,GO:0007165,GO:0007346,GO:0008150,GO:0008152,GO:0008219,GO:0009893,GO:0009987,GO:0010562,GO:0010604,GO:0010941,GO:0012501,GO:0016265,GO:0016301,GO:0016310,GO:0016740,GO:0016772,GO:…
GSADVT00035178001	6mA	GO:0000166,GO:0001882,GO:0001883,GO:0001932,GO:0001934,GO:0003674,GO:0003824,GO:0004672,GO:0004674,GO:0005488,GO:0005524,GO:0005575,GO:0005634,GO:0005737,GO:0005813,GO:0005815,GO:0006464,GO:0006468,GO:0006793,GO:0006796,GO:0007017,GO:0007059,GO:0008150,GO:0008152,GO:0009893,GO:0009966,GO:0009967,GO:0009987,GO:0010562,GO:0010564,GO:0010604,GO:0010646,GO:0010647,GO:0016301,GO:0016310,GO:0016740,GO:…
GSADVT00035320001	6mA	GO:0000166,GO:0001882,GO:0001883,GO:0001932,GO:0001934,GO:0003674,GO:0005488,GO:0005525,GO:0005575,GO:0005622,GO:0005886,GO:0005912,GO:0007165,GO:0007264,GO:0007275,GO:0008150,GO:0009893,GO:0010562,GO:0010604,GO:0016020,GO:0017076,GO:0019001,GO:0019220,GO:0019222,GO:0030054,GO:0031323,GO:0031325,GO:0031399,GO:0031401,GO:0032268,GO:0032270,GO:0032501,GO:0032502,GO:0032549,GO:0032550,GO:0032553,GO:…
GSADVT00015931001	6mA	GO:0000166,GO:0001882,GO:0001883,GO:0001936,GO:0001937,GO:0003674,GO:0003676,GO:0003723,GO:0003824,GO:0005102,GO:0005215,GO:0005488,GO:0005515,GO:0005524,GO:0005575,GO:0005739,GO:0005743,GO:0005753,GO:0005886,GO:0006139,GO:0006163,GO:0006164,GO:0006629,GO:0006725,GO:0006753,GO:0006754,GO:0006793,GO:0006796,GO:0006807,GO:0006810,GO:0006811,GO:0006812,GO:0006818,GO:0008150,GO:0008152,GO:0008180,GO:…
GSADVT00033419001	6mA	GO:0000166,GO:0001882,GO:0001883,GO:0002009,GO:0003674,GO:0003824,GO:0004672,GO:0004674,GO:0004697,GO:0005488,GO:0005524,GO:0005575,GO:0005634,GO:0005737,GO:0005829,GO:0005856,GO:0006139,GO:0006351,GO:0006355,GO:0006464,GO:0006468,GO:0006725,GO:0006793,GO:0006796,GO:0006807,GO:0006996,GO:0007010,GO:0007049,GO:0007155,GO:0007165,GO:0007391,GO:0007472,GO:0007560,GO:0008150,GO:0008152,GO:0009058,GO:…
GSADVT00009846001	6mA	GO:0000166,GO:0001882,GO:0001883,GO:0002097,GO:0002098,GO:0002143,GO:0003674,GO:0003824,GO:0004792,GO:0005488,GO:0005524,GO:0005575,GO:0005829,GO:0006139,GO:0006399,GO:0006400,GO:0006464,GO:0006725,GO:0006732,GO:0006777,GO:0006793,GO:0006796,GO:0006807,GO:0008033,GO:0008150,GO:0008152,GO:0008641,GO:0009058,GO:0009108,GO:0009451,GO:0009987,GO:0016070,GO:0016740,GO:0016772,GO:0016779,GO:0016782,GO:…
GSADVT00043830001	6mA	GO:0000166,GO:0001882,GO:0001883,GO:0002119,GO:0002164,GO:0003674,GO:0003824,GO:0004672,GO:0004713,GO:0004715,GO:0005488,GO:0005524,GO:0005575,GO:0005886,GO:0005911,GO:0006464,GO:0006468,GO:0006793,GO:0006796,GO:0007610,GO:0007631,GO:0008150,GO:0008152,GO:0009058,GO:0009790,GO:0009791,GO:0009792,GO:0009987,GO:0016020,GO:0016301,GO:0016310,GO:0016740,GO:0016772,GO:0016773,GO:0017076,GO:0018108,GO:…
GSADVT00004619001	6mA	GO:0000166,GO:0001882,GO:0001883,GO:0002376,GO:0002478,GO:0002495,GO:0002504,GO:0003674,GO:0003774,GO:0003777,GO:0003824,GO:0005488,GO:0005515,GO:0005524,GO:0005575,GO:0005813,GO:0005815,GO:0005829,GO:0005856,GO:0005871,GO:0005874,GO:0005875,GO:0005929,GO:0006810,GO:0006928,GO:0006996,GO:0007017,GO:0007018,GO:0007596,GO:0007599,GO:0008017,GO:0008092,GO:0008150,GO:0008574,GO:0009653,GO:0009987,GO:…
GSADVT00013023001	6mA	GO:0000166,GO:0001882,GO:0001883,GO:0002376,GO:0003674,GO:0003824,GO:0004672,GO:0004674,GO:0005488,GO:0005515,GO:0005516,GO:0005524,GO:0005575,GO:0005622,GO:0006464,GO:0006468,GO:0006793,GO:0006796,GO:0006950,GO:0006952,GO:0006955,GO:0006974,GO:0007165,GO:0007166,GO:0007167,GO:0007169,GO:0008150,GO:0008152,GO:0008286,GO:0008340,GO:0008630,GO:0009987,GO:0016301,GO:0016310,GO:0016740,GO:0016772,GO:…
GSADVT00016466001	6mA	GO:0000166,GO:0001882,GO:0001883,GO:0003002,GO:0003341,GO:0003351,GO:0003674,GO:0003824,GO:0004550,GO:0005488,GO:0005524,GO:0005575,GO:0005813,GO:0005815,GO:0006139,GO:0006163,GO:0006164,GO:0006165,GO:0006183,GO:0006213,GO:0006220,GO:0006221,GO:0006228,GO:0006241,GO:0006725,GO:0006753,GO:0006793,GO:0006796,GO:0006807,GO:0006810,GO:0006928,GO:0007017,GO:0007018,GO:0007368,GO:0007389,GO:0007420,GO:…
GSADVT00045993001	6mA	GO:0000166,GO:0001882,GO:0001883,GO:0003006,GO:0003674,GO:0003824,GO:0004175,GO:0004197,GO:0004198,GO:0004672,GO:0004674,GO:0005488,GO:0005524,GO:0005575,GO:0005622,GO:0005634,GO:0005737,GO:0006464,GO:0006468,GO:0006508,GO:0006793,GO:0006796,GO:0006915,GO:0006928,GO:0006935,GO:0007162,GO:0007165,GO:0008150,GO:0008152,GO:0008219,GO:0008233,GO:0008234,GO:0008283,GO:0009719,GO:0009987,GO:0010033,GO:…
GSADVT00035834001	6mA	GO:0000166,GO:0001882,GO:0001883,GO:0003008,GO:0003674,GO:0003774,GO:0003824,GO:0005488,GO:0005515,GO:0005524,GO:0005575,GO:0005737,GO:0005856,GO:0006928,GO:0007600,GO:0007605,GO:0008092,GO:0008150,GO:0008407,GO:0009653,GO:0009886,GO:0009887,GO:0009987,GO:0016043,GO:0016459,GO:0016462,GO:0016787,GO:0016817,GO:0016818,GO:0016887,GO:0017022,GO:0017076,GO:0017111,GO:0030029,GO:0030030,GO:0030048,GO:…
GSADVT00006337001	6mA	GO:0000166,GO:0001882,GO:0001883,GO:0003008,GO:0003674,GO:0003824,GO:0004383,GO:0004672,GO:0004872,GO:0005488,GO:0005524,GO:0005525,GO:0005575,GO:0005640,GO:0005887,GO:0006139,GO:0006163,GO:0006164,GO:0006182,GO:0006464,GO:0006468,GO:0006725,GO:0006753,GO:0006793,GO:0006796,GO:0006807,GO:0007165,GO:0007166,GO:0007167,GO:0007168,GO:0007186,GO:0007600,GO:0007601,GO:0007602,GO:0007603,GO:0008074,GO:…
GSADVT00030622001	6mA	GO:0000166,GO:0001882,GO:0001883,GO:0003674,GO:0003676,GO:0003677,GO:0003723,GO:0003724,GO:0003824,GO:0004004,GO:0004386,GO:0005488,GO:0005524,GO:0005575,GO:0005730,GO:0005794,GO:0006139,GO:0006725,GO:0006807,GO:0008026,GO:0008150,GO:0008152,GO:0008186,GO:0009987,GO:0010501,GO:0016070,GO:0016462,GO:0016787,GO:0016817,GO:0016818,GO:0016887,GO:0017076,GO:0017111,GO:0022613,GO:0030554,GO:0032549,GO:…
GSADVT00040443001	6mA	GO:0000166,GO:0001882,GO:0001883,GO:0003674,GO:0003676,GO:0003677,GO:0003824,GO:0003909,GO:0003910,GO:0004484,GO:0005488,GO:0005524,GO:0005575,GO:0005634,GO:0006139,GO:0006259,GO:0006260,GO:0006266,GO:0006281,GO:0006310,GO:0006370,GO:0006396,GO:0006397,GO:0006725,GO:0006807,GO:0006950,GO:0006974,GO:0007049,GO:0008150,GO:0008152,GO:0008192,GO:0009058,GO:0009059,GO:0009452,GO:0009987,GO:0016070,GO:…
GSADVT00011619001	6mA	GO:0000166,GO:0001882,GO:0001883,GO:0003674,GO:0003676,GO:0003677,GO:0003824,GO:0004386,GO:0005488,GO:0005524,GO:0005575,GO:0005634,GO:0016462,GO:0016787,GO:0016817,GO:0016818,GO:0017076,GO:0017111,GO:0030554,GO:0032549,GO:0032550,GO:0032553,GO:0032555,GO:0032559,GO:0035639,GO:0036094,GO:0043167,GO:0043168,GO:0043226,GO:0043227,GO:0043229,GO:0043231,GO:0044424,GO:0044464,GO:0097159,GO:0097367,GO:…
GSADVT00000939001	6mA	GO:0000166,GO:0001882,GO:0001883,GO:0003674,GO:0003676,GO:0003677,GO:0003824,GO:0004402,GO:0004672,GO:0004674,GO:0005488,GO:0005524,GO:0005575,GO:0005667,GO:0005669,GO:0006139,GO:0006325,GO:0006352,GO:0006355,GO:0006357,GO:0006464,GO:0006468,GO:0006473,GO:0006475,GO:0006725,GO:0006793,GO:0006796,GO:0006807,GO:0006996,GO:0007049,GO:0008080,GO:0008150,GO:0008152,GO:0009058,GO:0009059,GO:0009889,GO:…
GSADVT00006783001	6mA	GO:0000166,GO:0001882,GO:0001883,GO:0003674,GO:0003676,GO:0003723,GO:0003724,GO:0003824,GO:0004004,GO:0004386,GO:0005488,GO:0005524,GO:0005575,GO:0005634,GO:0005643,GO:0005737,GO:0006139,GO:0006405,GO:0006406,GO:0006725,GO:0006807,GO:0006810,GO:0006913,GO:0008026,GO:0008104,GO:0008150,GO:0008152,GO:0008186,GO:0009987,GO:0010501,GO:0015031,GO:0015931,GO:0016020,GO:0016070,GO:0016462,GO:0016482,GO:…
GSADVT00001158001	6mA	GO:0000166,GO:0001882,GO:0001883,GO:0003674,GO:0003676,GO:0003723,GO:0003746,GO:0003824,GO:0003924,GO:0005488,GO:0005525,GO:0005575,GO:0005622,GO:0006414,GO:0008135,GO:0008150,GO:0008152,GO:0009058,GO:0009059,GO:0009987,GO:0016462,GO:0016787,GO:0016817,GO:0016818,GO:0017076,GO:0017111,GO:0019001,GO:0032549,GO:0032550,GO:0032553,GO:0032555,GO:0032561,GO:0034645,GO:0035639,GO:0036094,GO:0043167,GO:…
GSADVT00015785001	6mA	GO:0000166,GO:0001882,GO:0001883,GO:0003674,GO:0003774,GO:0003777,GO:0003824,GO:0005488,GO:0005515,GO:0005524,GO:0005575,GO:0005737,GO:0005871,GO:0005874,GO:0005875,GO:0006928,GO:0007017,GO:0007018,GO:0008017,GO:0008092,GO:0008150,GO:0009987,GO:0015631,GO:0016462,GO:0016787,GO:0016817,GO:0016818,GO:0016887,GO:0017076,GO:0017111,GO:0030554,GO:0031982,GO:0031988,GO:0032403,GO:0032549,GO:0032550,GO:…
GSADVT00017905001	6mA	GO:0000166,GO:0001882,GO:0001883,GO:0003674,GO:0003774,GO:0003777,GO:0003824,GO:0005488,GO:0005524,GO:0005575,GO:0005737,GO:0005874,GO:0005875,GO:0005929,GO:0006928,GO:0007017,GO:0007018,GO:0008150,GO:0009987,GO:0016462,GO:0016787,GO:0016817,GO:0016818,GO:0016887,GO:0017076,GO:0017111,GO:0030286,GO:0030554,GO:0032549,GO:0032550,GO:0032553,GO:0032555,GO:0032559,GO:0032991,GO:0035639,GO:0036094,GO:…
GSADVT00001940001	6mA	GO:0000166,GO:0001882,GO:0001883,GO:0003674,GO:0003774,GO:0003824,GO:0005488,GO:0005524,GO:0005575,GO:0016459,GO:0016462,GO:0016787,GO:0016817,GO:0016818,GO:0017076,GO:0017111,GO:0030016,GO:0030554,GO:0032549,GO:0032550,GO:0032553,GO:0032555,GO:0032559,GO:0032982,GO:0032991,GO:0035639,GO:0036094,GO:0043167,GO:0043168,GO:0043226,GO:0043228,GO:0043229,GO:0043232,GO:0043234,GO:0043292,GO:0044422,GO:…
GSADVT00006039001	6mA	GO:0000166,GO:0001882,GO:0001883,GO:0003674,GO:0003779,GO:0003785,GO:0003824,GO:0005488,GO:0005515,GO:0005524,GO:0005575,GO:0005886,GO:0006629,GO:0006644,GO:0006650,GO:0006793,GO:0006796,GO:0008092,GO:0008150,GO:0008152,GO:0009987,GO:0016020,GO:0016301,GO:0016307,GO:0016308,GO:0016310,GO:0016740,GO:0016772,GO:0016773,GO:0017076,GO:0019637,GO:0030258,GO:0030554,GO:0032403,GO:0032549,GO:0032550,GO:…
GSADVT00014390001	6mA	GO:0000166,GO:0001882,GO:0001883,GO:0003674,GO:0003824,GO:0003878,GO:0005488,GO:0005524,GO:0005575,GO:0005634,GO:0005829,GO:0006082,GO:0006101,GO:0006629,GO:0008150,GO:0008152,GO:0009987,GO:0016740,GO:0016746,GO:0017076,GO:0019752,GO:0030554,GO:0032549,GO:0032550,GO:0032553,GO:0032555,GO:0032559,GO:0035639,GO:0036094,GO:0043167,GO:0043168,GO:0043169,GO:0043226,GO:0043227,GO:0043229,GO:0043231,GO:…
GSADVT00019060001	6mA	GO:0000166,GO:0001882,GO:0001883,GO:0003674,GO:0003824,GO:0003924,GO:0004871,GO:0005488,GO:0005515,GO:0005525,GO:0007165,GO:0007166,GO:0007186,GO:0007187,GO:0007188,GO:0008150,GO:0016462,GO:0016787,GO:0016817,GO:0016818,GO:0017076,GO:0017111,GO:0019001,GO:0031683,GO:0032403,GO:0032549,GO:0032550,GO:0032553,GO:0032555,GO:0032561,GO:0035639,GO:0036094,GO:0043167,GO:0043168,GO:0043169,GO:0044877,GO:…
GSADVT00001831001	6mA	GO:0000166,GO:0001882,GO:0001883,GO:0003674,GO:0003824,GO:0003924,GO:0005198,GO:0005200,GO:0005488,GO:0005525,GO:0005575,GO:0005737,GO:0005874,GO:0007017,GO:0008150,GO:0009987,GO:0016462,GO:0016787,GO:0016817,GO:0016818,GO:0017076,GO:0017111,GO:0019001,GO:0032549,GO:0032550,GO:0032553,GO:0032555,GO:0032561,GO:0032991,GO:0035639,GO:0036094,GO:0043167,GO:0043168,GO:0043234,GO:0044422,GO:0044424,GO:…
GSADVT00015538001	6mA	GO:0000166,GO:0001882,GO:0001883,GO:0003674,GO:0003824,GO:0003924,GO:0005488,GO:0005525,GO:0005575,GO:0005622,GO:0005743,GO:0006412,GO:0008150,GO:0008152,GO:0009058,GO:0009059,GO:0009987,GO:0016020,GO:0016462,GO:0016787,GO:0016817,GO:0016818,GO:0017076,GO:0017111,GO:0019001,GO:0019538,GO:0019866,GO:0031090,GO:0031966,GO:0032549,GO:0032550,GO:0032553,GO:0032555,GO:0032561,GO:0034645,GO:0035639,GO:…
GSADVT00011537001	6mA	GO:0000166,GO:0001882,GO:0001883,GO:0003674,GO:0003824,GO:0003924,GO:0005488,GO:0005525,GO:0005575,GO:0005622,GO:0007165,GO:0007264,GO:0008150,GO:0008544,GO:0009888,GO:0016020,GO:0016462,GO:0016787,GO:0016817,GO:0016818,GO:0017076,GO:0017111,GO:0019001,GO:0032502,GO:0032549,GO:0032550,GO:0032553,GO:0032555,GO:0032561,GO:0035556,GO:0035639,GO:0036094,GO:0040002,GO:0042335,GO:0043167,GO:0043168,GO:…
GSADVT00004504001	6mA	GO:0000166,GO:0001882,GO:0001883,GO:0003674,GO:0003824,GO:0003924,GO:0005488,GO:0005525,GO:0005575,GO:0005634,GO:0006810,GO:0006886,GO:0006913,GO:0007165,GO:0007264,GO:0008104,GO:0008150,GO:0015031,GO:0016462,GO:0016482,GO:0016787,GO:0016817,GO:0016818,GO:0017076,GO:0017111,GO:0019001,GO:0032549,GO:0032550,GO:0032553,GO:0032555,GO:0032561,GO:0033036,GO:0035556,GO:0035639,GO:0036094,GO:0043167,GO:…
GSADVT00034054001	6mA	GO:0000166,GO:0001882,GO:0001883,GO:0003674,GO:0003824,GO:0003924,GO:0005488,GO:0005525,GO:0005575,GO:0005654,GO:0005737,GO:0005739,GO:0016462,GO:0016787,GO:0016817,GO:0016818,GO:0017076,GO:0017111,GO:0019001,GO:0032549,GO:0032550,GO:0032553,GO:0032555,GO:0032561,GO:0035639,GO:0036094,GO:0043167,GO:0043168,GO:0043226,GO:0043227,GO:0043229,GO:0043231,GO:0044422,GO:0044424,GO:0044428,GO:0044444,GO:…
GSADVT00002906001	6mA	GO:0000166,GO:0001882,GO:0001883,GO:0003674,GO:0003824,GO:0004672,GO:0004674,GO:0004697,GO:0004698,GO:0005488,GO:0005515,GO:0005524,GO:0005575,GO:0005829,GO:0006464,GO:0006468,GO:0006793,GO:0006796,GO:0007165,GO:0008150,GO:0008152,GO:0008270,GO:0009931,GO:0009987,GO:0010857,GO:0016020,GO:0016301,GO:0016310,GO:0016740,GO:0016772,GO:0016773,GO:0017076,GO:0018105,GO:0018107,GO:0018193,GO:0018209,GO:…
GSADVT00018260001	6mA	GO:0000166,GO:0001882,GO:0001883,GO:0003674,GO:0003824,GO:0004672,GO:0004674,GO:0004713,GO:0005488,GO:0005524,GO:0005575,GO:0005634,GO:0005737,GO:0005815,GO:0006464,GO:0006468,GO:0006793,GO:0006796,GO:0008150,GO:0008152,GO:0009987,GO:0016301,GO:0016310,GO:0016740,GO:0016772,GO:0016773,GO:0017076,GO:0019538,GO:0030554,GO:0032549,GO:0032550,GO:0032553,GO:0032555,GO:0032559,GO:0035639,GO:0036094,GO:…
GSADVT00027940001	6mA	GO:0000166,GO:0001882,GO:0001883,GO:0003674,GO:0003824,GO:0004672,GO:0004674,GO:0005085,GO:0005088,GO:0005089,GO:0005488,GO:0005524,GO:0005575,GO:0005737,GO:0008150,GO:0009966,GO:0010646,GO:0016301,GO:0016740,GO:0016772,GO:0016773,GO:0017076,GO:0023051,GO:0030554,GO:0032549,GO:0032550,GO:0032553,GO:0032555,GO:0032559,GO:0035023,GO:0035639,GO:0036094,GO:0043167,GO:0043168,GO:0044424,GO:0044464,GO:…
GSADVT00006364001	6mA	GO:0000166,GO:0001882,GO:0001883,GO:0003674,GO:0003824,GO:0004672,GO:0004674,GO:0005488,GO:0005515,GO:0005524,GO:0005575,GO:0005576,GO:0005618,GO:0005829,GO:0005886,GO:0005887,GO:0006950,GO:0007154,GO:0008150,GO:0009267,GO:0009405,GO:0009605,GO:0009889,GO:0009890,GO:0009892,GO:0009893,GO:0009987,GO:0009991,GO:0010565,GO:0016020,GO:0016021,GO:0016036,GO:0016301,GO:0016740,GO:0016772,GO:0016773,GO:…
GSADVT00065719001	6mA	GO:0000166,GO:0001882,GO:0001883,GO:0003674,GO:0003824,GO:0004672,GO:0004674,GO:0005488,GO:0005515,GO:0005524,GO:0005575,GO:0005576,GO:0005618,GO:0005829,GO:0005886,GO:0005887,GO:0006950,GO:0007154,GO:0008150,GO:0009267,GO:0009405,GO:0009605,GO:0009889,GO:0009890,GO:0009892,GO:0009893,GO:0009987,GO:0009991,GO:0010565,GO:0016020,GO:0016021,GO:0016036,GO:0016301,GO:0016740,GO:0016772,GO:0016773,GO:…
GSADVT00015929001	6mA	GO:0000166,GO:0001882,GO:0001883,GO:0003674,GO:0003824,GO:0004672,GO:0004674,GO:0005488,GO:0005524,GO:0005575,GO:0005634,GO:0005737,GO:0006464,GO:0006468,GO:0006793,GO:0006796,GO:0007165,GO:0007166,GO:0008150,GO:0008152,GO:0009987,GO:0016055,GO:0016301,GO:0016310,GO:0016740,GO:0016772,GO:0016773,GO:0017076,GO:0019538,GO:0030554,GO:0032549,GO:0032550,GO:0032553,GO:0032555,GO:0032559,GO:0035639,GO:…
GSADVT00057395001	6mA	GO:0000166,GO:0001882,GO:0001883,GO:0003674,GO:0003824,GO:0004672,GO:0004674,GO:0005488,GO:0005524,GO:0005575,GO:0005634,GO:0016301,GO:0016740,GO:0016772,GO:0016773,GO:0017076,GO:0030554,GO:0032549,GO:0032550,GO:0032553,GO:0032555,GO:0032559,GO:0035639,GO:0036094,GO:0043167,GO:0043168,GO:0043226,GO:0043227,GO:0043229,GO:0043231,GO:0044424,GO:0044464,GO:0097159,GO:0097367,GO:1901265,GO:1901363
GSADVT00007371001	6mA	GO:0000166,GO:0001882,GO:0001883,GO:0003674,GO:0003824,GO:0004672,GO:0004713,GO:0004714,GO:0004871,GO:0004872,GO:0004888,GO:0005488,GO:0005515,GO:0005524,GO:0005575,GO:0005737,GO:0005886,GO:0005887,GO:0006464,GO:0006468,GO:0006793,GO:0006796,GO:0007165,GO:0007166,GO:0007167,GO:0007169,GO:0008150,GO:0008152,GO:0009987,GO:0016020,GO:0016021,GO:0016055,GO:0016301,GO:0016310,GO:0016740,GO:0016772,GO:…
GSADVT00004671001	6mA	GO:0000166,GO:0001882,GO:0001883,GO:0003674,GO:0003824,GO:0004672,GO:0004713,GO:0004714,GO:0004871,GO:0004872,GO:0004888,GO:0005488,GO:0005515,GO:0005524,GO:0005575,GO:0006464,GO:0006468,GO:0006793,GO:0006796,GO:0008150,GO:0008152,GO:0009987,GO:0016021,GO:0016301,GO:0016310,GO:0016740,GO:0016772,GO:0016773,GO:0017076,GO:0019199,GO:0019538,GO:0030554,GO:0031224,GO:0032549,GO:0032550,GO:0032553,GO:…
GSADVT00019133001	6mA	GO:0000166,GO:0001882,GO:0001883,GO:0003674,GO:0003824,GO:0004672,GO:0005488,GO:0005524,GO:0005575,GO:0005938,GO:0006464,GO:0006468,GO:0006793,GO:0006796,GO:0006810,GO:0006888,GO:0008150,GO:0008152,GO:0009987,GO:0012505,GO:0016020,GO:0016192,GO:0016301,GO:0016310,GO:0016482,GO:0016740,GO:0016772,GO:0016773,GO:0017076,GO:0019538,GO:0030027,GO:0030554,GO:0032549,GO:0032550,GO:0032553,GO:0032555,GO:…
GSADVT00011431001	6mA	GO:0000166,GO:0001882,GO:0001883,GO:0003674,GO:0003824,GO:0005215,GO:0005488,GO:0005524,GO:0005575,GO:0005739,GO:0005740,GO:0005741,GO:0005743,GO:0005768,GO:0005783,GO:0005794,GO:0005886,GO:0006725,GO:0006778,GO:0006779,GO:0006807,GO:0006810,GO:0006873,GO:0006875,GO:0006879,GO:0007420,GO:0008150,GO:0008152,GO:0009058,GO:0009987,GO:0015232,GO:0015399,GO:0015405,GO:0015439,GO:0015562,GO:0015886,GO:…
GSADVT00049383001	6mA	GO:0000166,GO:0001882,GO:0001883,GO:0003674,GO:0003824,GO:0005215,GO:0005488,GO:0005524,GO:0005575,GO:0005886,GO:0006810,GO:0008150,GO:0008559,GO:0009987,GO:0015238,GO:0015399,GO:0015405,GO:0016020,GO:0016021,GO:0016462,GO:0016787,GO:0016817,GO:0016818,GO:0016820,GO:0016887,GO:0017076,GO:0017111,GO:0022804,GO:0022857,GO:0030554,GO:0031224,GO:0032549,GO:0032550,GO:0032553,GO:0032555,GO:0032559,GO:…
GSADVT00039367001	6mA	GO:0000166,GO:0001882,GO:0001883,GO:0003674,GO:0003824,GO:0005215,GO:0005488,GO:0005524,GO:0005575,GO:0005886,GO:0016020,GO:0016462,GO:0016787,GO:0016817,GO:0016818,GO:0016887,GO:0017076,GO:0017111,GO:0030554,GO:0032549,GO:0032550,GO:0032553,GO:0032555,GO:0032559,GO:0035639,GO:0036094,GO:0043167,GO:0043168,GO:0044464,GO:0097159,GO:0097367,GO:1901265,GO:1901363
GSADVT00011259001	6mA	GO:0000166,GO:0001882,GO:0001883,GO:0003674,GO:0003824,GO:0005215,GO:0005488,GO:0005524,GO:0005575,GO:0005887,GO:0006810,GO:0008150,GO:0008509,GO:0008514,GO:0009987,GO:0015075,GO:0015399,GO:0015405,GO:0016020,GO:0016021,GO:0016324,GO:0016462,GO:0016787,GO:0016817,GO:0016818,GO:0016820,GO:0016887,GO:0017076,GO:0017111,GO:0022804,GO:0022857,GO:0022891,GO:0022892,GO:0030554,GO:0031224,GO:0031226,GO:…
GSADVT00021110001	6mA	GO:0000166,GO:0001882,GO:0001883,GO:0003674,GO:0003824,GO:0005488,GO:0005524,GO:0005575,GO:0005737,GO:0005975,GO:0006139,GO:0006725,GO:0006753,GO:0006793,GO:0006796,GO:0006807,GO:0008150,GO:0008152,GO:0009058,GO:0009117,GO:0009165,GO:0009225,GO:0009226,GO:0009987,GO:0016301,GO:0016740,GO:0016772,GO:0016773,GO:0016779,GO:0017076,GO:0018130,GO:0019438,GO:0019637,GO:0030554,GO:0032549,GO:0032550,GO:…
GSADVT00004531001	6mA	GO:0000166,GO:0001882,GO:0001883,GO:0003674,GO:0003824,GO:0005488,GO:0005524,GO:0005575,GO:0005737,GO:0006464,GO:0006468,GO:0006793,GO:0006796,GO:0008150,GO:0008152,GO:0008887,GO:0009987,GO:0016301,GO:0016310,GO:0016740,GO:0016772,GO:0016773,GO:0017076,GO:0019538,GO:0030554,GO:0032549,GO:0032550,GO:0032553,GO:0032555,GO:0032559,GO:0035639,GO:0036094,GO:0036211,GO:0043167,GO:0043168,GO:0043170,GO:…
GSADVT00032792001	6mA	GO:0000166,GO:0001882,GO:0001883,GO:0003674,GO:0003824,GO:0005488,GO:0005524,GO:0005575,GO:0006810,GO:0008150,GO:0016020,GO:0016021,GO:0016462,GO:0016787,GO:0016817,GO:0016818,GO:0016887,GO:0017076,GO:0017111,GO:0030554,GO:0031224,GO:0032549,GO:0032550,GO:0032553,GO:0032555,GO:0032559,GO:0035639,GO:0036094,GO:0043167,GO:0043168,GO:0044425,GO:0051179,GO:0051234,GO:0097159,GO:0097367,GO:1901265,GO:…
GSADVT00003140001	6mA	GO:0000166,GO:0001882,GO:0001883,GO:0003674,GO:0003824,GO:0005488,GO:0005524,GO:0006793,GO:0006796,GO:0008150,GO:0008152,GO:0009987,GO:0016301,GO:0016310,GO:0016740,GO:0016772,GO:0017076,GO:0030554,GO:0032549,GO:0032550,GO:0032553,GO:0032555,GO:0032559,GO:0035639,GO:0036094,GO:0043167,GO:0043168,GO:0044237,GO:0097159,GO:0097367,GO:1901265,GO:1901363
GSADVT00003857001	6mA	GO:0000166,GO:0001882,GO:0001883,GO:0003674,GO:0003824,GO:0005488,GO:0005524,GO:0016209,GO:0016491,GO:0016667,GO:0017076,GO:0030554,GO:0032542,GO:0032549,GO:0032550,GO:0032553,GO:0032555,GO:0032559,GO:0035639,GO:0036094,GO:0043167,GO:0043168,GO:0097159,GO:0097367,GO:1901265,GO:1901363
GSADVT00007990001	6mA	GO:0000166,GO:0001882,GO:0001883,GO:0003674,GO:0005488,GO:0005509,GO:0005525,GO:0005575,GO:0006810,GO:0007165,GO:0007264,GO:0008104,GO:0008150,GO:0015031,GO:0017076,GO:0019001,GO:0032549,GO:0032550,GO:0032553,GO:0032555,GO:0032561,GO:0033036,GO:0035556,GO:0035639,GO:0036094,GO:0043167,GO:0043168,GO:0043169,GO:0044424,GO:0044444,GO:0044464,GO:0045184,GO:0046872,GO:0048471,GO:0050789,GO:0050794,GO:…
GSADVT00010361001	6mA	GO:0000166,GO:0001882,GO:0001883,GO:0003674,GO:0005488,GO:0005515,GO:0005525,GO:0005575,GO:0005622,GO:0007165,GO:0007264,GO:0008150,GO:0016020,GO:0017076,GO:0019001,GO:0031090,GO:0031253,GO:0032549,GO:0032550,GO:0032553,GO:0032555,GO:0032561,GO:0035556,GO:0035639,GO:0036094,GO:0043167,GO:0043168,GO:0044422,GO:0044425,GO:0044441,GO:0044459,GO:0044463,GO:0044464,GO:0050789,GO:0050794,GO:0060170,GO:…
GSADVT00024379001	6mA	GO:0000166,GO:0001882,GO:0001883,GO:0003674,GO:0005488,GO:0005524,GO:0005575,GO:0005634,GO:0005737,GO:0005813,GO:0005815,GO:0008150,GO:0008152,GO:0009058,GO:0016043,GO:0016226,GO:0017076,GO:0022607,GO:0030554,GO:0031163,GO:0031616,GO:0032549,GO:0032550,GO:0032553,GO:0032555,GO:0032559,GO:0035639,GO:0036094,GO:0043167,GO:0043168,GO:0043169,GO:0043226,GO:0043227,GO:0043228,GO:0043229,GO:0043231,GO:…
GSADVT00001409001	6mA	GO:0000166,GO:0001882,GO:0001883,GO:0003674,GO:0005488,GO:0005524,GO:0005575,GO:0005737,GO:0005885,GO:0007015,GO:0008064,GO:0008150,GO:0009987,GO:0010638,GO:0016043,GO:0017076,GO:0030554,GO:0030832,GO:0030833,GO:0030838,GO:0031334,GO:0032271,GO:0032273,GO:0032535,GO:0032549,GO:0032550,GO:0032553,GO:0032555,GO:0032559,GO:0032956,GO:0032970,GO:0032991,GO:0033043,GO:0034314,GO:0035639,GO:0036094,GO:…
GSADVT00050652001	6mA	GO:0000166,GO:0001882,GO:0001883,GO:0003674,GO:0005488,GO:0005524,GO:0005575,GO:0005737,GO:0005886,GO:0006605,GO:0006810,GO:0006886,GO:0008104,GO:0008150,GO:0009987,GO:0015031,GO:0016020,GO:0017038,GO:0017076,GO:0030554,GO:0032549,GO:0032550,GO:0032553,GO:0032555,GO:0032559,GO:0033036,GO:0035639,GO:0036094,GO:0043167,GO:0043168,GO:0043169,GO:0044424,GO:0044464,GO:0044699,GO:0044763,GO:0044765,GO:…
GSADVT00014438001	6mA	GO:0000166,GO:0001882,GO:0001883,GO:0003674,GO:0005488,GO:0005524,GO:0005575,GO:0009507,GO:0009536,GO:0017076,GO:0030554,GO:0032549,GO:0032550,GO:0032553,GO:0032555,GO:0032559,GO:0035639,GO:0036094,GO:0043167,GO:0043168,GO:0043226,GO:0043227,GO:0043229,GO:0043231,GO:0044424,GO:0044444,GO:0044464,GO:0097159,GO:0097367,GO:1901265,GO:1901363
GSADVT00005979001	6mA	GO:0000166,GO:0001882,GO:0001883,GO:0003674,GO:0005488,GO:0005524,GO:0017076,GO:0030554,GO:0032549,GO:0032550,GO:0032553,GO:0032555,GO:0032559,GO:0035639,GO:0036094,GO:0043167,GO:0043168,GO:0097159,GO:0097367,GO:1901265,GO:1901363
GSADVT00019861001	6mA	GO:0000166,GO:0001882,GO:0001883,GO:0003674,GO:0005488,GO:0005525,GO:0005575,GO:0005634,GO:0005829,GO:0017076,GO:0019001,GO:0032549,GO:0032550,GO:0032553,GO:0032555,GO:0032561,GO:0035639,GO:0036094,GO:0043167,GO:0043168,GO:0043226,GO:0043227,GO:0043229,GO:0043231,GO:0044424,GO:0044444,GO:0044464,GO:0097159,GO:0097367,GO:1901265,GO:1901363
GSADVT00008925001	6mA	GO:0000166,GO:0001882,GO:0001883,GO:0003674,GO:0005488,GO:0005525,GO:0005575,GO:0005794,GO:0006810,GO:0007165,GO:0007264,GO:0008104,GO:0008150,GO:0015031,GO:0016192,GO:0017076,GO:0019001,GO:0032549,GO:0032550,GO:0032553,GO:0032555,GO:0032561,GO:0033036,GO:0035556,GO:0035639,GO:0036094,GO:0043167,GO:0043168,GO:0043226,GO:0043227,GO:0043229,GO:0043231,GO:0044424,GO:0044444,GO:0044464,GO:0045184,GO:…
GSADVT00026317001	6mA	GO:0000166,GO:0001882,GO:0001883,GO:0003674,GO:0005488,GO:0005525,GO:0005575,GO:0005794,GO:0006810,GO:0007165,GO:0007264,GO:0008104,GO:0008150,GO:0015031,GO:0016192,GO:0017076,GO:0019001,GO:0032549,GO:0032550,GO:0032553,GO:0032555,GO:0032561,GO:0033036,GO:0035556,GO:0035639,GO:0036094,GO:0043167,GO:0043168,GO:0043226,GO:0043227,GO:0043229,GO:0043231,GO:0044424,GO:0044444,GO:0044464,GO:0045184,GO:…
GSADVT00045463001	6mA	GO:0000166,GO:0001882,GO:0001883,GO:0003674,GO:0005488,GO:0005525,GO:0005575,GO:0016020,GO:0017076,GO:0019001,GO:0032549,GO:0032550,GO:0032553,GO:0032555,GO:0032561,GO:0035639,GO:0036094,GO:0043167,GO:0043168,GO:0097159,GO:0097367,GO:1901265,GO:1901363
GSADVT00008156001	6mA	GO:0000166,GO:0001882,GO:0001883,GO:0003674,GO:0005488,GO:0005525,GO:0017076,GO:0019001,GO:0032549,GO:0032550,GO:0032553,GO:0032555,GO:0032561,GO:0035639,GO:0036094,GO:0043167,GO:0043168,GO:0097159,GO:0097367,GO:1901265,GO:1901363
GSADVT00011173001	6mA	GO:0000166,GO:0001882,GO:0001883,GO:0003674,GO:0005488,GO:0005525,GO:0017076,GO:0019001,GO:0032549,GO:0032550,GO:0032553,GO:0032555,GO:0032561,GO:0035639,GO:0036094,GO:0043167,GO:0043168,GO:0097159,GO:0097367,GO:1901265,GO:1901363
GSADVT00004224001	6mA	GO:0000166,GO:0003008,GO:0003674,GO:0003824,GO:0004112,GO:0004114,GO:0004115,GO:0005488,GO:0005575,GO:0005829,GO:0006139,GO:0006163,GO:0006195,GO:0006198,GO:0006725,GO:0006753,GO:0006793,GO:0006796,GO:0006807,GO:0007165,GO:0007600,GO:0007606,GO:0007608,GO:0008081,GO:0008150,GO:0008152,GO:0009056,GO:0009117,GO:0009150,GO:0009154,GO:0009166,GO:0009187,GO:0009214,GO:0009259,GO:0009261,GO:0009966,GO:…
GSADVT00034683001	6mA	GO:0000166,GO:0003674,GO:0003676,GO:0003723,GO:0005488,GO:0005575,GO:0005634,GO:0005654,GO:0005694,GO:0005730,GO:0005737,GO:0007275,GO:0008150,GO:0016020,GO:0032501,GO:0032502,GO:0036094,GO:0040019,GO:0043226,GO:0043227,GO:0043228,GO:0043229,GO:0043231,GO:0043232,GO:0044422,GO:0044424,GO:0044428,GO:0044446,GO:0044464,GO:0044699,GO:0044707,GO:0044767,GO:0044822,GO:0045995,GO:0048518,GO:0050789,GO:…
GSADVT00002062001	6mA	GO:0000166,GO:0003674,GO:0003676,GO:0003723,GO:0005488,GO:0005575,GO:0005634,GO:0005737,GO:0006405,GO:0006406,GO:0006810,GO:0006913,GO:0008150,GO:0015931,GO:0016482,GO:0016604,GO:0016607,GO:0036094,GO:0043226,GO:0043227,GO:0043229,GO:0043231,GO:0044422,GO:0044424,GO:0044428,GO:0044446,GO:0044451,GO:0044464,GO:0046907,GO:0050657,GO:0050658,GO:0051028,GO:0051168,GO:0051169,GO:0051179,GO:0051234,GO:…
GSADVT00000533001	6mA	GO:0000166,GO:0003674,GO:0003676,GO:0003723,GO:0005488,GO:0005575,GO:0005634,GO:0030529,GO:0032991,GO:0036094,GO:0043226,GO:0043227,GO:0043229,GO:0043231,GO:0044424,GO:0044464,GO:0097159,GO:1901265,GO:1901363
GSADVT00012589001	6mA	GO:0000166,GO:0003674,GO:0003676,GO:0003723,GO:0005488,GO:0005575,GO:0005654,GO:0005681,GO:0005737,GO:0006139,GO:0006396,GO:0006397,GO:0006725,GO:0006807,GO:0008150,GO:0008152,GO:0008380,GO:0009987,GO:0016070,GO:0016071,GO:0030529,GO:0032991,GO:0034641,GO:0036094,GO:0043170,GO:0044237,GO:0044238,GO:0044260,GO:0044422,GO:0044424,GO:0044428,GO:0044446,GO:0044464,GO:0046483,GO:0071704,GO:0090304,GO:…
GSADVT00026218001	6mA	GO:0000166,GO:0003674,GO:0003824,GO:0003885,GO:0005488,GO:0005575,GO:0008150,GO:0008152,GO:0008168,GO:0016020,GO:0016491,GO:0016614,GO:0016740,GO:0016741,GO:0016899,GO:0036094,GO:0043167,GO:0043168,GO:0044699,GO:0044710,GO:0048037,GO:0050660,GO:0050662,GO:0055114,GO:0097159,GO:1901265,GO:1901363
GSADVT00008245001	6mA	GO:0000166,GO:0003674,GO:0003824,GO:0004616,GO:0005488,GO:0005575,GO:0005759,GO:0006082,GO:0006520,GO:0006573,GO:0006574,GO:0006807,GO:0008150,GO:0008152,GO:0008442,GO:0009056,GO:0009063,GO:0009081,GO:0009083,GO:0009987,GO:0016054,GO:0016491,GO:0016614,GO:0016616,GO:0019752,GO:0031974,GO:0034641,GO:0036094,GO:0043233,GO:0043436,GO:0044237,GO:0044238,GO:0044248,GO:0044281,GO:0044282,GO:0044422,GO:…
GSADVT00057633001	6mA	GO:0000166,GO:0003674,GO:0003824,GO:0004733,GO:0005488,GO:0008150,GO:0008152,GO:0010181,GO:0016491,GO:0016638,GO:0016641,GO:0032553,GO:0036094,GO:0043167,GO:0043168,GO:0044699,GO:0044710,GO:0048037,GO:0050662,GO:0055114,GO:0097159,GO:0097367,GO:1901265,GO:1901363
GSADVT00000381001	6mA	GO:0000166,GO:0003674,GO:0003824,GO:0005488,GO:0005575,GO:0005739,GO:0005743,GO:0006139,GO:0006725,GO:0006732,GO:0006733,GO:0006739,GO:0006740,GO:0006753,GO:0006793,GO:0006796,GO:0006807,GO:0006810,GO:0006811,GO:0006812,GO:0006818,GO:0008150,GO:0008152,GO:0008746,GO:0008750,GO:0009117,GO:0009987,GO:0015672,GO:0015992,GO:0016020,GO:0016021,GO:0016491,GO:0016651,GO:0016652,GO:0019362,GO:0019637,GO:…
GSADVT00020271001	6mA	GO:0000166,GO:0003674,GO:0003824,GO:0005488,GO:0005575,GO:0005739,GO:0006082,GO:0008150,GO:0008152,GO:0008863,GO:0009056,GO:0009987,GO:0015942,GO:0016054,GO:0016491,GO:0016614,GO:0016616,GO:0016620,GO:0016903,GO:0019752,GO:0032787,GO:0036094,GO:0042183,GO:0043226,GO:0043227,GO:0043229,GO:0043231,GO:0043436,GO:0044237,GO:0044248,GO:0044281,GO:0044282,GO:0044424,GO:0044444,GO:0044464,GO:0044699,GO:…
GSADVT00001539001	6mA	GO:0000166,GO:0003674,GO:0003824,GO:0005488,GO:0005575,GO:0005886,GO:0008150,GO:0008152,GO:0016020,GO:0016491,GO:0016614,GO:0036094,GO:0043167,GO:0043168,GO:0044464,GO:0044699,GO:0044710,GO:0048037,GO:0050660,GO:0050662,GO:0055114,GO:0097159,GO:1901265,GO:1901363
GSADVT00002593001	6mA	GO:0000166,GO:0003674,GO:0005488,GO:0005575,GO:0005737,GO:0005886,GO:0005952,GO:0006928,GO:0007411,GO:0007610,GO:0007622,GO:0007623,GO:0007626,GO:0008150,GO:0008603,GO:0009987,GO:0016020,GO:0017076,GO:0019207,GO:0019887,GO:0030234,GO:0030534,GO:0030551,GO:0030552,GO:0030554,GO:0032501,GO:0032553,GO:0032555,GO:0032559,GO:0032991,GO:0036094,GO:0043167,GO:0043168,GO:0043234,GO:0044424,GO:0044464,GO:…
GSADVT00011426001	6mA	GO:0000166,GO:0003674,GO:0005488,GO:0005575,GO:0005765,GO:0005774,GO:0006810,GO:0006811,GO:0008150,GO:0016020,GO:0016021,GO:0031090,GO:0031224,GO:0031982,GO:0031988,GO:0036094,GO:0043226,GO:0043227,GO:0043230,GO:0044421,GO:0044422,GO:0044424,GO:0044425,GO:0044437,GO:0044444,GO:0044446,GO:0044464,GO:0044699,GO:0044765,GO:0051179,GO:0051234,GO:0065010,GO:0070062,GO:0097159,GO:0098588,GO:1901265,GO:…
GSADVT00033125001	6mA	GO:0000184,GO:0000290,GO:0000932,GO:0000956,GO:0003674,GO:0003676,GO:0003723,GO:0003729,GO:0003824,GO:0005488,GO:0005575,GO:0005634,GO:0005737,GO:0006139,GO:0006401,GO:0006402,GO:0006725,GO:0006807,GO:0008047,GO:0008150,GO:0008152,GO:0009056,GO:0009057,GO:0009893,GO:0009987,GO:0016020,GO:0016070,GO:0016071,GO:0016787,GO:0019222,GO:0019439,GO:0030234,GO:0030529,GO:0031087,GO:0032991,GO:0034641,GO:…
GSADVT00052334001	6mA	GO:0000184,GO:0000956,GO:0003674,GO:0003676,GO:0003723,GO:0003729,GO:0003735,GO:0005198,GO:0005488,GO:0005575,GO:0005634,GO:0005730,GO:0005737,GO:0005829,GO:0005840,GO:0005912,GO:0005924,GO:0005925,GO:0006139,GO:0006401,GO:0006402,GO:0006412,GO:0006413,GO:0006414,GO:0006415,GO:0006417,GO:0006446,GO:0006605,GO:0006612,GO:0006613,GO:0006614,GO:0006725,GO:0006807,GO:0006810,GO:0006886,GO:0008104,GO:…
GSADVT00013938001	6mA	GO:0000184,GO:0000956,GO:0006139,GO:0006401,GO:0006402,GO:0006725,GO:0006807,GO:0008150,GO:0008152,GO:0009056,GO:0009057,GO:0009987,GO:0016070,GO:0016071,GO:0019439,GO:0034641,GO:0034655,GO:0043170,GO:0044237,GO:0044238,GO:0044248,GO:0044260,GO:0044265,GO:0044270,GO:0046483,GO:0046700,GO:0071704,GO:0090304,GO:1901360,GO:1901361,GO:1901575
GSADVT00008044001	6mA	GO:0000187,GO:0001540,GO:0001666,GO:0001817,GO:0001818,GO:0001932,GO:0001934,GO:0003008,GO:0003674,GO:0004871,GO:0004872,GO:0004888,GO:0004889,GO:0005215,GO:0005216,GO:0005230,GO:0005231,GO:0005261,GO:0005488,GO:0005515,GO:0005575,GO:0005886,GO:0005892,GO:0006810,GO:0006811,GO:0006812,GO:0006816,GO:0006873,GO:0006874,GO:0006875,GO:0006950,GO:0007154,GO:0007165,GO:0007267,GO:0007268,GO:0007271,GO:…
GSADVT00044838001	6mA	GO:0000187,GO:0001556,GO:0001932,GO:0001934,GO:0003006,GO:0003674,GO:0003707,GO:0004871,GO:0004872,GO:0005488,GO:0005496,GO:0005575,GO:0005886,GO:0006140,GO:0007165,GO:0007194,GO:0007275,GO:0008150,GO:0008289,GO:0009719,GO:0009725,GO:0009755,GO:0009889,GO:0009890,GO:0009892,GO:0009893,GO:0009966,GO:0009967,GO:0009987,GO:0010033,GO:0010562,GO:0010563,GO:0010604,GO:0010646,GO:0010647,GO:0014070,GO:…
GSADVT00044790001	6mA	GO:0000187,GO:0001932,GO:0001933,GO:0001934,GO:0003674,GO:0003676,GO:0003723,GO:0003824,GO:0004721,GO:0004725,GO:0005102,GO:0005488,GO:0005515,GO:0005575,GO:0005737,GO:0005768,GO:0005769,GO:0005783,GO:0005829,GO:0005886,GO:0006464,GO:0006469,GO:0006470,GO:0006521,GO:0006793,GO:0006796,GO:0006950,GO:0006984,GO:0006996,GO:0007010,GO:0007165,GO:0007166,GO:0007167,GO:0007169,GO:0007257,GO:0008150,GO:…
GSADVT00037421001	6mA	GO:0000188,GO:0001932,GO:0001933,GO:0002237,GO:0002682,GO:0002683,GO:0002697,GO:0002698,GO:0002819,GO:0003674,GO:0003824,GO:0004721,GO:0004725,GO:0005575,GO:0005654,GO:0005794,GO:0006464,GO:0006469,GO:0006470,GO:0006793,GO:0006796,GO:0008138,GO:0008150,GO:0008152,GO:0009605,GO:0009607,GO:0009892,GO:0009966,GO:0009968,GO:0009987,GO:0010001,GO:0010033,GO:0010563,GO:0010605,GO:0010646,GO:0010648,GO:…
GSADVT00001252001	6mA	GO:0000209,GO:0002376,GO:0002474,GO:0003674,GO:0003824,GO:0004175,GO:0004177,GO:0004180,GO:0004197,GO:0005575,GO:0005634,GO:0005737,GO:0005829,GO:0006464,GO:0006508,GO:0008150,GO:0008152,GO:0008233,GO:0008234,GO:0008238,GO:0009636,GO:0009987,GO:0016567,GO:0016787,GO:0019538,GO:0019882,GO:0031982,GO:0031988,GO:0032446,GO:0036211,GO:0042221,GO:0042493,GO:0043170,GO:0043226,GO:0043227,GO:0043229,GO:…
GSADVT00020265001	6mA	GO:0000226,GO:0000280,GO:0005575,GO:0005634,GO:0005737,GO:0006928,GO:0006996,GO:0007010,GO:0007017,GO:0007051,GO:0007052,GO:0007067,GO:0007346,GO:0008104,GO:0008150,GO:0009987,GO:0016043,GO:0022402,GO:0030317,GO:0033036,GO:0033365,GO:0034504,GO:0034613,GO:0040011,GO:0043226,GO:0043227,GO:0043229,GO:0043231,GO:0043900,GO:0043933,GO:0044424,GO:0044464,GO:0044699,GO:0044763,GO:0048285,GO:0048870,GO:…
GSADVT00055470001	6mA	GO:0000226,GO:0000776,GO:0000777,GO:0001578,GO:0001948,GO:0001952,GO:0002162,GO:0003674,GO:0005488,GO:0005515,GO:0005575,GO:0005794,GO:0005813,GO:0005815,GO:0005828,GO:0005856,GO:0005874,GO:0005876,GO:0005881,GO:0005938,GO:0006903,GO:0006996,GO:0007010,GO:0007017,GO:0007020,GO:0007026,GO:0007030,GO:0007051,GO:0007052,GO:0008017,GO:0008092,GO:0008150,GO:0009987,GO:0010458,GO:0010470,GO:0010632,GO:…
GSADVT00029025001	6mA	GO:0000226,GO:0001932,GO:0001934,GO:0003674,GO:0005085,GO:0005488,GO:0005515,GO:0005575,GO:0005622,GO:0005912,GO:0005924,GO:0005925,GO:0006521,GO:0006996,GO:0007010,GO:0007017,GO:0007163,GO:0007165,GO:0007264,GO:0007409,GO:0008150,GO:0009653,GO:0009893,GO:0009987,GO:0010562,GO:0010565,GO:0010604,GO:0014910,GO:0014911,GO:0016043,GO:0017016,GO:0017048,GO:0019220,GO:0019222,GO:0019899,GO:0022027,GO:…
GSADVT00043296001	6mA	GO:0000226,GO:0003674,GO:0003824,GO:0005488,GO:0005515,GO:0005575,GO:0005622,GO:0005819,GO:0005829,GO:0005874,GO:0005875,GO:0006996,GO:0007010,GO:0007017,GO:0007026,GO:0007165,GO:0007166,GO:0007389,GO:0008017,GO:0008092,GO:0008104,GO:0008150,GO:0008270,GO:0009893,GO:0009966,GO:0009967,GO:0009987,GO:0010562,GO:0010639,GO:0010646,GO:0010647,GO:0015631,GO:0016043,GO:0016874,GO:0019220,GO:0019221,GO:…
GSADVT00040531001	6mA	GO:0000242,GO:0000280,GO:0000922,GO:0003674,GO:0005488,GO:0005515,GO:0005575,GO:0005654,GO:0005730,GO:0005814,GO:0005815,GO:0005886,GO:0006996,GO:0007067,GO:0008104,GO:0008150,GO:0009987,GO:0016020,GO:0016043,GO:0022402,GO:0033036,GO:0033365,GO:0034613,GO:0036064,GO:0043226,GO:0043228,GO:0043229,GO:0043232,GO:0044380,GO:0044422,GO:0044424,GO:0044428,GO:0044430,GO:0044441,GO:0044444,GO:0044446,GO:…
GSADVT00022340001	6mA	GO:0000245,GO:0000974,GO:0003674,GO:0003676,GO:0003723,GO:0005488,GO:0005575,GO:0005681,GO:0008150,GO:0009719,GO:0009987,GO:0010033,GO:0016043,GO:0021987,GO:0022607,GO:0022618,GO:0030529,GO:0032502,GO:0032991,GO:0034622,GO:0042221,GO:0043234,GO:0043933,GO:0044422,GO:0044424,GO:0044428,GO:0044446,GO:0044464,GO:0044699,GO:0044767,GO:0048856,GO:0050896,GO:0051716,GO:0065003,GO:0070848,GO:0070887,GO:…
GSADVT00006981001	6mA	GO:0000270,GO:0003674,GO:0003824,GO:0005575,GO:0005576,GO:0006022,GO:0006026,GO:0006027,GO:0006807,GO:0006950,GO:0006952,GO:0008150,GO:0008152,GO:0008745,GO:0009056,GO:0009057,GO:0009253,GO:0009605,GO:0009607,GO:0009617,GO:0009987,GO:0016043,GO:0016787,GO:0016810,GO:0016811,GO:0030203,GO:0042742,GO:0043170,GO:0043207,GO:0045229,GO:0050896,GO:0051704,GO:0051707,GO:0071554,GO:0071555,GO:0071704,GO:…
GSADVT00062459001	6mA	GO:0000271,GO:0003674,GO:0003824,GO:0005575,GO:0005576,GO:0005618,GO:0005794,GO:0005911,GO:0005975,GO:0005976,GO:0006073,GO:0008150,GO:0008152,GO:0009058,GO:0009059,GO:0009250,GO:0009506,GO:0009987,GO:0016043,GO:0016051,GO:0016740,GO:0016757,GO:0016853,GO:0016866,GO:0030054,GO:0030243,GO:0030244,GO:0030312,GO:0033692,GO:0034637,GO:0034645,GO:0043170,GO:0043226,GO:0043227,GO:0043229,GO:0043231,GO:…
GSADVT00008837001	6mA	GO:0000272,GO:0001871,GO:0003674,GO:0003824,GO:0004553,GO:0005488,GO:0005575,GO:0005576,GO:0005975,GO:0005976,GO:0006073,GO:0008150,GO:0008152,GO:0008810,GO:0009056,GO:0009057,GO:0009251,GO:0009987,GO:0016052,GO:0016787,GO:0016798,GO:0030243,GO:0030245,GO:0030246,GO:0030247,GO:0030248,GO:0043170,GO:0044042,GO:0044237,GO:0044238,GO:0044247,GO:0044248,GO:0044260,GO:0044262,GO:0044264,GO:0044275,GO:…
GSADVT00009019001	6mA	GO:0000272,GO:0001871,GO:0003674,GO:0003824,GO:0004553,GO:0005488,GO:0005575,GO:0005576,GO:0005975,GO:0005976,GO:0006073,GO:0008150,GO:0008152,GO:0008810,GO:0009056,GO:0009057,GO:0009251,GO:0009987,GO:0016052,GO:0016787,GO:0016798,GO:0030243,GO:0030245,GO:0030246,GO:0030247,GO:0030248,GO:0043170,GO:0044042,GO:0044237,GO:0044238,GO:0044247,GO:0044248,GO:0044260,GO:0044262,GO:0044264,GO:0044275,GO:…
GSADVT00009039001	6mA	GO:0000276,GO:0003674,GO:0005215,GO:0005575,GO:0005739,GO:0005811,GO:0006139,GO:0006163,GO:0006164,GO:0006725,GO:0006753,GO:0006754,GO:0006793,GO:0006796,GO:0006807,GO:0006810,GO:0006811,GO:0006812,GO:0006818,GO:0006897,GO:0006909,GO:0008150,GO:0008152,GO:0008324,GO:0009058,GO:0009116,GO:0009117,GO:0009119,GO:0009123,GO:0009124,GO:0009126,GO:0009127,GO:0009141,GO:0009142,GO:0009144,GO:0009145,GO:…
GSADVT00008078001	6mA	GO:0000280,GO:0000723,GO:0000932,GO:0000956,GO:0003674,GO:0003676,GO:0003677,GO:0003723,GO:0003824,GO:0004518,GO:0004527,GO:0004532,GO:0004534,GO:0004540,GO:0005488,GO:0005575,GO:0005634,GO:0005737,GO:0005794,GO:0005856,GO:0005886,GO:0006139,GO:0006259,GO:0006396,GO:0006401,GO:0006402,GO:0006725,GO:0006807,GO:0006996,GO:0007126,GO:0007568,GO:0007569,GO:0008150,GO:0008152,GO:0008334,GO:0008409,GO:…
GSADVT00035213001	6mA	GO:0000280,GO:0000922,GO:0003674,GO:0005488,GO:0005515,GO:0005575,GO:0005737,GO:0005813,GO:0005815,GO:0005819,GO:0006996,GO:0007067,GO:0007346,GO:0008150,GO:0009987,GO:0016043,GO:0022402,GO:0030496,GO:0032991,GO:0043226,GO:0043228,GO:0043229,GO:0043232,GO:0043234,GO:0044422,GO:0044424,GO:0044430,GO:0044446,GO:0044464,GO:0044699,GO:0044763,GO:0048285,GO:0050789,GO:0050794,GO:0051233,GO:0051301,GO:…
GSADVT00036105001	6mA	GO:0000280,GO:0003674,GO:0004871,GO:0005198,GO:0005575,GO:0005768,GO:0005770,GO:0005802,GO:0005819,GO:0005905,GO:0006810,GO:0006886,GO:0006897,GO:0006898,GO:0006996,GO:0007067,GO:0007165,GO:0008104,GO:0008150,GO:0009653,GO:0009987,GO:0010827,GO:0010828,GO:0015031,GO:0016020,GO:0016023,GO:0016043,GO:0016192,GO:0016197,GO:0022402,GO:0030117,GO:0030118,GO:0030120,GO:0030125,GO:0030130,GO:0030132,GO:…
GSADVT00031753001	6mA	GO:0000280,GO:0003674,GO:0005488,GO:0005515,GO:0005575,GO:0005634,GO:0006996,GO:0007049,GO:0007067,GO:0007346,GO:0008150,GO:0009794,GO:0009987,GO:0016043,GO:0016538,GO:0019207,GO:0019887,GO:0019899,GO:0019900,GO:0019901,GO:0022402,GO:0030234,GO:0043226,GO:0043227,GO:0043229,GO:0043231,GO:0044424,GO:0044464,GO:0044699,GO:0044763,GO:0045995,GO:0048285,GO:0050789,GO:0050793,GO:0050794,GO:0051239,GO:…
GSADVT00000840001	6mA	GO:0000287,GO:0003674,GO:0003824,GO:0004610,GO:0004614,GO:0005488,GO:0005575,GO:0005829,GO:0005975,GO:0006040,GO:0006047,GO:0006048,GO:0006139,GO:0006464,GO:0006486,GO:0006487,GO:0006493,GO:0006725,GO:0006753,GO:0006793,GO:0006796,GO:0006807,GO:0007276,GO:0007283,GO:0008150,GO:0008152,GO:0009058,GO:0009117,GO:0009165,GO:0009225,GO:0009226,GO:0009987,GO:0016853,GO:0016866,GO:0016868,GO:0018130,GO:…
GSADVT00030077001	6mA	GO:0000287,GO:0003674,GO:0003824,GO:0005488,GO:0005575,GO:0005634,GO:0005829,GO:0005975,GO:0005996,GO:0006006,GO:0006139,GO:0006148,GO:0006152,GO:0006166,GO:0006725,GO:0006807,GO:0008150,GO:0008152,GO:0008617,GO:0008973,GO:0009056,GO:0009058,GO:0009116,GO:0009119,GO:0009163,GO:0009164,GO:0009987,GO:0016853,GO:0016866,GO:0016868,GO:0018130,GO:0019318,GO:0019438,GO:0019439,GO:0034641,GO:0034654,GO:…
GSADVT00053745001	6mA	GO:0000302,GO:0000303,GO:0000305,GO:0003674,GO:0003824,GO:0004553,GO:0004649,GO:0005488,GO:0005575,GO:0005634,GO:0005654,GO:0005737,GO:0005739,GO:0005759,GO:0006950,GO:0006979,GO:0008150,GO:0009987,GO:0010035,GO:0016787,GO:0016798,GO:0031974,GO:0033554,GO:0034599,GO:0034614,GO:0042221,GO:0043167,GO:0043169,GO:0043226,GO:0043227,GO:0043229,GO:0043231,GO:0043233,GO:0044422,GO:0044424,GO:0044428,GO:…
GSADVT00027405001	6mA	GO:0000302,GO:0000323,GO:0001101,GO:0001894,GO:0003674,GO:0003824,GO:0004032,GO:0004033,GO:0005575,GO:0005615,GO:0005654,GO:0005764,GO:0005773,GO:0005829,GO:0005902,GO:0005911,GO:0005975,GO:0005996,GO:0006059,GO:0006060,GO:0006061,GO:0006066,GO:0006584,GO:0006725,GO:0006807,GO:0006950,GO:0006979,GO:0007165,GO:0008106,GO:0008150,GO:0008152,GO:0008284,GO:0009058,GO:0009414,GO:0009415,GO:0009628,GO:…
GSADVT00027326001	6mA	GO:0000302,GO:0001505,GO:0002682,GO:0003008,GO:0003674,GO:0003824,GO:0004721,GO:0004722,GO:0004723,GO:0005488,GO:0005575,GO:0005955,GO:0006464,GO:0006470,GO:0006793,GO:0006796,GO:0006810,GO:0006836,GO:0006950,GO:0006979,GO:0007269,GO:0007610,GO:0007611,GO:0007613,GO:0008021,GO:0008150,GO:0008152,GO:0008287,GO:0009987,GO:0010035,GO:0016023,GO:0016192,GO:0016311,GO:0016787,GO:0016788,GO:0016791,GO:…
GSADVT00048305001	6mA	GO:0000302,GO:0003674,GO:0005215,GO:0005575,GO:0005886,GO:0006810,GO:0006811,GO:0006812,GO:0006813,GO:0006814,GO:0006950,GO:0006970,GO:0006979,GO:0008150,GO:0008324,GO:0009526,GO:0009628,GO:0009651,GO:0009941,GO:0009987,GO:0010035,GO:0010163,GO:0015075,GO:0015077,GO:0015078,GO:0015291,GO:0015297,GO:0015298,GO:0015299,GO:0015672,GO:0016020,GO:0016021,GO:0019222,GO:0022804,GO:0022857,GO:0022890,GO:…
GSADVT00030005001	6mA	GO:0000323,GO:0001932,GO:0001933,GO:0003674,GO:0003824,GO:0004620,GO:0004767,GO:0005575,GO:0005615,GO:0005764,GO:0005768,GO:0005773,GO:0005775,GO:0005886,GO:0006066,GO:0006469,GO:0006576,GO:0006629,GO:0006643,GO:0006644,GO:0006664,GO:0006665,GO:0006672,GO:0006684,GO:0006685,GO:0006687,GO:0006793,GO:0006796,GO:0006807,GO:0007165,GO:0007399,GO:0008081,GO:0008150,GO:0008152,GO:0008610,GO:0009056,GO:…
GSADVT00057823001	6mA	GO:0000323,GO:0002376,GO:0002478,GO:0002495,GO:0002504,GO:0003006,GO:0003674,GO:0003824,GO:0004175,GO:0004177,GO:0004180,GO:0004197,GO:0005488,GO:0005575,GO:0005576,GO:0005615,GO:0005730,GO:0005764,GO:0005773,GO:0005775,GO:0005902,GO:0006508,GO:0006950,GO:0007154,GO:0007276,GO:0007283,GO:0007568,GO:0008150,GO:0008152,GO:0008219,GO:0008233,GO:0008234,GO:0008238,GO:0008285,GO:0009267,GO:0009605,GO:…
GSADVT00012987001	6mA	GO:0000323,GO:0003008,GO:0003012,GO:0003674,GO:0005215,GO:0005216,GO:0005217,GO:0005218,GO:0005244,GO:0005245,GO:0005261,GO:0005262,GO:0005488,GO:0005515,GO:0005575,GO:0005764,GO:0005765,GO:0005773,GO:0005774,GO:0005886,GO:0006810,GO:0006811,GO:0006812,GO:0006816,GO:0006873,GO:0006874,GO:0006875,GO:0006936,GO:0006939,GO:0006996,GO:0007033,GO:0007040,GO:0007165,GO:0007204,GO:0007584,GO:0008150,GO:…
GSADVT00007649001	6mA	GO:0000323,GO:0003008,GO:0003012,GO:0003674,GO:0005215,GO:0005216,GO:0005217,GO:0005218,GO:0005244,GO:0005245,GO:0005261,GO:0005262,GO:0005575,GO:0005764,GO:0005765,GO:0005773,GO:0005774,GO:0005886,GO:0006810,GO:0006811,GO:0006936,GO:0006939,GO:0008150,GO:0008324,GO:0009987,GO:0015075,GO:0015085,GO:0015267,GO:0015276,GO:0015278,GO:0016020,GO:0016021,GO:0022803,GO:0022832,GO:0022834,GO:0022836,GO:…
GSADVT00014556001	6mA	GO:0000323,GO:0003008,GO:0003674,GO:0003824,GO:0004553,GO:0004559,GO:0005488,GO:0005537,GO:0005575,GO:0005615,GO:0005764,GO:0005773,GO:0005975,GO:0005996,GO:0006013,GO:0006464,GO:0006517,GO:0007610,GO:0007611,GO:0008150,GO:0008152,GO:0008270,GO:0009987,GO:0015923,GO:0016787,GO:0016798,GO:0019318,GO:0019538,GO:0030246,GO:0031982,GO:0031988,GO:0032501,GO:0036211,GO:0043167,GO:0043169,GO:0043170,GO:…
GSADVT00008482001	6mA	GO:0000323,GO:0003674,GO:0003824,GO:0004175,GO:0004197,GO:0004843,GO:0005488,GO:0005515,GO:0005575,GO:0005764,GO:0005773,GO:0006464,GO:0006508,GO:0006511,GO:0008150,GO:0008152,GO:0008233,GO:0008234,GO:0008238,GO:0008242,GO:0008270,GO:0009056,GO:0009057,GO:0009893,GO:0009894,GO:0009896,GO:0009987,GO:0010604,GO:0016579,GO:0016787,GO:0019222,GO:0019538,GO:0019783,GO:0019941,GO:0030162,GO:0031323,GO:…
GSADVT00016715001	6mA	GO:0000323,GO:0003674,GO:0003824,GO:0004553,GO:0004559,GO:0005488,GO:0005575,GO:0005764,GO:0005773,GO:0005975,GO:0005996,GO:0006013,GO:0008150,GO:0008152,GO:0008270,GO:0015923,GO:0016787,GO:0016798,GO:0019318,GO:0030246,GO:0043167,GO:0043169,GO:0043226,GO:0043227,GO:0043229,GO:0043231,GO:0044238,GO:0044424,GO:0044444,GO:0044464,GO:0044699,GO:0044710,GO:0044723,GO:0046872,GO:0046914,GO:0071704
GSADVT00010332001	6mA	GO:0000339,GO:0003674,GO:0003676,GO:0003723,GO:0003729,GO:0003730,GO:0005488,GO:0005515,GO:0005575,GO:0005654,GO:0005737,GO:0006413,GO:0006417,GO:0007165,GO:0008150,GO:0008152,GO:0008190,GO:0008283,GO:0008494,GO:0009889,GO:0009891,GO:0009893,GO:0009894,GO:0009896,GO:0009987,GO:0010468,GO:0010506,GO:0010508,GO:0010556,GO:0010557,GO:0010604,GO:0010608,GO:0010628,GO:0010646,GO:0010647,GO:0016020,GO:…
GSADVT00001669001	6mA	GO:0000375,GO:0000377,GO:0000398,GO:0000974,GO:0005575,GO:0005681,GO:0005730,GO:0006139,GO:0006396,GO:0006397,GO:0006725,GO:0006807,GO:0008150,GO:0008152,GO:0008380,GO:0009987,GO:0016070,GO:0016071,GO:0030529,GO:0032991,GO:0034641,GO:0043170,GO:0043226,GO:0043228,GO:0043229,GO:0043232,GO:0043234,GO:0044237,GO:0044238,GO:0044260,GO:0044422,GO:0044424,GO:0044428,GO:0044446,GO:0044464,GO:0046483,GO:…
GSADVT00005117001	6mA	GO:0000375,GO:0000377,GO:0000398,GO:0003674,GO:0003676,GO:0003723,GO:0003729,GO:0005488,GO:0005575,GO:0005634,GO:0005654,GO:0006139,GO:0006351,GO:0006353,GO:0006366,GO:0006369,GO:0006378,GO:0006379,GO:0006396,GO:0006397,GO:0006725,GO:0006807,GO:0008150,GO:0008152,GO:0008380,GO:0009058,GO:0009059,GO:0009987,GO:0010467,GO:0016070,GO:0016071,GO:0018130,GO:0019438,GO:0031123,GO:0031124,GO:0032774,GO:…
GSADVT00025952001	6mA	GO:0000413,GO:0003674,GO:0003755,GO:0003824,GO:0006457,GO:0006464,GO:0008150,GO:0008152,GO:0009987,GO:0016853,GO:0016859,GO:0018193,GO:0018208,GO:0019538,GO:0036211,GO:0043170,GO:0043412,GO:0044237,GO:0044238,GO:0044260,GO:0044267,GO:0071704
GSADVT00007375001	6mA	GO:0000422,GO:0000423,GO:0003674,GO:0005215,GO:0005575,GO:0005739,GO:0005741,GO:0005742,GO:0006605,GO:0006626,GO:0006810,GO:0006839,GO:0006886,GO:0006914,GO:0006950,GO:0006996,GO:0007005,GO:0007006,GO:0007008,GO:0007154,GO:0008104,GO:0008150,GO:0008152,GO:0008320,GO:0008565,GO:0009056,GO:0009267,GO:0009605,GO:0009987,GO:0009991,GO:0010468,GO:0010608,GO:0015031,GO:0016020,GO:0016021,GO:0016043,GO:…
GSADVT00034677001	6mA	GO:0000428,GO:0003674,GO:0003676,GO:0003677,GO:0003824,GO:0003899,GO:0003916,GO:0005488,GO:0005575,GO:0005634,GO:0005694,GO:0005730,GO:0005736,GO:0005829,GO:0006139,GO:0006259,GO:0006265,GO:0006351,GO:0006353,GO:0006360,GO:0006363,GO:0006725,GO:0006807,GO:0006996,GO:0008150,GO:0008152,GO:0008270,GO:0009058,GO:0009059,GO:0009987,GO:0016043,GO:0016070,GO:0016740,GO:0016772,GO:0016779,GO:0016853,GO:…
GSADVT00013500001	6mA	GO:0000428,GO:0003674,GO:0003676,GO:0003677,GO:0003824,GO:0003899,GO:0005488,GO:0005575,GO:0005634,GO:0005654,GO:0005665,GO:0005666,GO:0005736,GO:0006139,GO:0006351,GO:0006360,GO:0006366,GO:0006383,GO:0006725,GO:0006807,GO:0008150,GO:0008152,GO:0009058,GO:0009059,GO:0009987,GO:0016070,GO:0016740,GO:0016772,GO:0016779,GO:0018130,GO:0019438,GO:0030880,GO:0032774,GO:0032991,GO:0034062,GO:0034641,GO:…
GSADVT00044787001	6mA	GO:0000462,GO:0003674,GO:0003676,GO:0003723,GO:0005488,GO:0005515,GO:0005575,GO:0005634,GO:0005730,GO:0006139,GO:0006364,GO:0006725,GO:0006807,GO:0008150,GO:0008152,GO:0009987,GO:0016020,GO:0016070,GO:0016072,GO:0030490,GO:0030515,GO:0030529,GO:0030684,GO:0031090,GO:0031965,GO:0032040,GO:0032991,GO:0034388,GO:0034470,GO:0034641,GO:0034660,GO:0043170,GO:0043226,GO:0043227,GO:0043228,GO:0043229,GO:…
GSADVT00037463001	6mA	GO:0000502,GO:0003674,GO:0003824,GO:0004175,GO:0004298,GO:0005575,GO:0005634,GO:0005654,GO:0005737,GO:0005829,GO:0005839,GO:0006508,GO:0006511,GO:0008150,GO:0008152,GO:0008233,GO:0009056,GO:0009057,GO:0009987,GO:0016787,GO:0019538,GO:0019773,GO:0019941,GO:0031982,GO:0031988,GO:0032991,GO:0043170,GO:0043226,GO:0043227,GO:0043229,GO:0043230,GO:0043231,GO:0043234,GO:0043632,GO:0044237,GO:0044238,GO:…
GSADVT00027157001	6mA	GO:0000502,GO:0003674,GO:0003824,GO:0004175,GO:0004298,GO:0005575,GO:0005634,GO:0005737,GO:0005839,GO:0006508,GO:0006511,GO:0008150,GO:0008152,GO:0008233,GO:0009056,GO:0009057,GO:0009987,GO:0010498,GO:0016787,GO:0019538,GO:0019773,GO:0019941,GO:0030163,GO:0032991,GO:0043161,GO:0043170,GO:0043226,GO:0043227,GO:0043229,GO:0043231,GO:0043234,GO:0043632,GO:0044237,GO:0044238,GO:0044248,GO:0044260,GO:…
GSADVT00028533001	6mA	GO:0000502,GO:0003674,GO:0003824,GO:0004843,GO:0004857,GO:0004866,GO:0005488,GO:0005515,GO:0005575,GO:0005737,GO:0005886,GO:0006464,GO:0006508,GO:0006511,GO:0007154,GO:0007267,GO:0007268,GO:0008150,GO:0008152,GO:0008233,GO:0008234,GO:0009056,GO:0009057,GO:0009892,GO:0009894,GO:0009895,GO:0009986,GO:0009987,GO:0010466,GO:0010605,GO:0010951,GO:0010955,GO:0016020,GO:0016023,GO:0016579,GO:0016787,GO:…
GSADVT00051414001	6mA	GO:0000724,GO:0000725,GO:0003674,GO:0003676,GO:0003677,GO:0003824,GO:0004518,GO:0004519,GO:0004520,GO:0004536,GO:0005488,GO:0005575,GO:0005634,GO:0005813,GO:0005815,GO:0006139,GO:0006259,GO:0006281,GO:0006302,GO:0006310,GO:0006725,GO:0006807,GO:0006950,GO:0006974,GO:0007346,GO:0008150,GO:0008152,GO:0008821,GO:0009987,GO:0010564,GO:0010824,GO:0016787,GO:0016788,GO:0016889,GO:0016894,GO:0031982,GO:…
GSADVT00000951001	6mA	GO:0000741,GO:0001510,GO:0003006,GO:0003674,GO:0003824,GO:0005488,GO:0005575,GO:0005829,GO:0006139,GO:0006220,GO:0006221,GO:0006325,GO:0006355,GO:0006399,GO:0006400,GO:0006464,GO:0006479,GO:0006606,GO:0006725,GO:0006753,GO:0006793,GO:0006796,GO:0006807,GO:0006810,GO:0006886,GO:0006913,GO:0006996,GO:0008033,GO:0008104,GO:0008150,GO:0008152,GO:0008168,GO:0008170,GO:0008173,GO:0008175,GO:0008176,GO:…
GSADVT00009777001	6mA	GO:0000768,GO:0001932,GO:0001933,GO:0001942,GO:0003674,GO:0003824,GO:0004857,GO:0004866,GO:0004867,GO:0005488,GO:0005515,GO:0005575,GO:0005576,GO:0005615,GO:0005886,GO:0006949,GO:0008150,GO:0008285,GO:0009892,GO:0009966,GO:0009968,GO:0009986,GO:0009987,GO:0010563,GO:0010605,GO:0010646,GO:0010648,GO:0010837,GO:0010839,GO:0016020,GO:0017015,GO:0019220,GO:0019222,GO:0019838,GO:0019955,GO:0022404,GO:…
GSADVT00005937001	6mA	GO:0000775,GO:0003674,GO:0003824,GO:0005488,GO:0005515,GO:0005575,GO:0005634,GO:0006139,GO:0006325,GO:0006351,GO:0006355,GO:0006464,GO:0006479,GO:0006725,GO:0006807,GO:0006996,GO:0007049,GO:0008150,GO:0008152,GO:0008168,GO:0008170,GO:0008213,GO:0008270,GO:0008276,GO:0008757,GO:0009058,GO:0009059,GO:0009653,GO:0009889,GO:0009987,GO:0010468,GO:0010556,GO:0016043,GO:0016070,GO:0016278,GO:0016279,GO:…
GSADVT00008672001	6mA	GO:0000781,GO:0003674,GO:0003824,GO:0004842,GO:0005488,GO:0005575,GO:0005634,GO:0006139,GO:0006259,GO:0006281,GO:0006310,GO:0006464,GO:0006725,GO:0006807,GO:0006950,GO:0006974,GO:0008150,GO:0008152,GO:0009987,GO:0016567,GO:0016740,GO:0016874,GO:0019538,GO:0019787,GO:0030915,GO:0032446,GO:0032991,GO:0033554,GO:0034641,GO:0036211,GO:0043167,GO:0043169,GO:0043170,GO:0043226,GO:0043227,GO:0043229,GO:…
GSADVT00025868001	6mA	GO:0000902,GO:0000904,GO:0001558,GO:0003006,GO:0003674,GO:0003824,GO:0005488,GO:0005575,GO:0005829,GO:0006935,GO:0008150,GO:0008152,GO:0008270,GO:0009653,GO:0009826,GO:0009860,GO:0009932,GO:0009987,GO:0010035,GO:0010038,GO:0010183,GO:0010769,GO:0016043,GO:0016049,GO:0016209,GO:0016491,GO:0016651,GO:0016667,GO:0016668,GO:0019725,GO:0022414,GO:0022603,GO:0022604,GO:0032502,GO:0032989,GO:0040007,GO:…
GSADVT00001824001	6mA	GO:0000902,GO:0001701,GO:0001894,GO:0003674,GO:0003676,GO:0003723,GO:0003779,GO:0005198,GO:0005488,GO:0005515,GO:0005575,GO:0005634,GO:0005654,GO:0005829,GO:0005886,GO:0005912,GO:0005924,GO:0005925,GO:0006810,GO:0006884,GO:0006915,GO:0006921,GO:0006950,GO:0006984,GO:0006996,GO:0007010,GO:0007015,GO:0007165,GO:0008064,GO:0008092,GO:0008134,GO:0008150,GO:0008152,GO:0008219,GO:0008290,GO:0009653,GO:…
GSADVT00049705001	6mA	GO:0000902,GO:0001977,GO:0002376,GO:0002548,GO:0003008,GO:0003014,GO:0003071,GO:0003093,GO:0003105,GO:0003674,GO:0003824,GO:0004721,GO:0004725,GO:0004871,GO:0004872,GO:0004888,GO:0005001,GO:0005488,GO:0005515,GO:0005575,GO:0005886,GO:0005887,GO:0006464,GO:0006470,GO:0006793,GO:0006796,GO:0006928,GO:0006935,GO:0007043,GO:0007162,GO:0007411,GO:0008150,GO:0008152,GO:0009653,GO:0009966,GO:0009968,GO:…
GSADVT00047980001	6mA	GO:0000902,GO:0003674,GO:0003824,GO:0003924,GO:0005488,GO:0005515,GO:0005575,GO:0005737,GO:0005856,GO:0005874,GO:0005929,GO:0006457,GO:0006458,GO:0007023,GO:0008092,GO:0008150,GO:0008152,GO:0009653,GO:0009987,GO:0015631,GO:0016043,GO:0016462,GO:0016787,GO:0016817,GO:0016818,GO:0017111,GO:0019538,GO:0031513,GO:0032391,GO:0032502,GO:0032989,GO:0032991,GO:0042995,GO:0043170,GO:0043226,GO:0043228,GO:…
GSADVT00056130001	6mA	GO:0000922,GO:0003674,GO:0003824,GO:0004721,GO:0004722,GO:0004725,GO:0005575,GO:0005634,GO:0005654,GO:0005737,GO:0005813,GO:0005815,GO:0005819,GO:0006461,GO:0006464,GO:0006470,GO:0006793,GO:0006796,GO:0006996,GO:0007017,GO:0007050,GO:0007088,GO:0007096,GO:0007346,GO:0008138,GO:0008150,GO:0008152,GO:0009987,GO:0010564,GO:0010927,GO:0016043,GO:0016311,GO:0016787,GO:0016788,GO:0016791,GO:0019538,GO:…
GSADVT00019181001	6mA	GO:0000975,GO:0000976,GO:0000977,GO:0000978,GO:0000981,GO:0000982,GO:0000987,GO:0001012,GO:0001067,GO:0001071,GO:0001077,GO:0001159,GO:0001228,GO:0001947,GO:0002009,GO:0003002,GO:0003143,GO:0003674,GO:0003676,GO:0003677,GO:0003700,GO:0005488,GO:0005575,GO:0005634,GO:0005737,GO:0006139,GO:0006351,GO:0006355,GO:0006357,GO:0006366,GO:0006725,GO:0006807,GO:0007368,GO:0007389,GO:0008150,GO:0008152,GO:…
GSADVT00026873001	6mA	GO:0000975,GO:0000976,GO:0000977,GO:0000981,GO:0001012,GO:0001067,GO:0001071,GO:0003674,GO:0003676,GO:0003677,GO:0003700,GO:0004879,GO:0005488,GO:0005575,GO:0005634,GO:0006109,GO:0006139,GO:0006351,GO:0006355,GO:0006357,GO:0006725,GO:0006807,GO:0006950,GO:0007165,GO:0008150,GO:0008152,GO:0008270,GO:0009058,GO:0009059,GO:0009605,GO:0009755,GO:0009889,GO:0009987,GO:0009991,GO:0010468,GO:0010556,GO:…
GSADVT00028564001	6mA	GO:0000975,GO:0000976,GO:0000977,GO:0000981,GO:0001012,GO:0001067,GO:0001071,GO:0003674,GO:0003676,GO:0003677,GO:0003700,GO:0004879,GO:0005488,GO:0005575,GO:0005634,GO:0006109,GO:0006139,GO:0006351,GO:0006355,GO:0006357,GO:0006725,GO:0006807,GO:0006950,GO:0007165,GO:0008150,GO:0008152,GO:0008270,GO:0009058,GO:0009059,GO:0009605,GO:0009755,GO:0009889,GO:0009987,GO:0009991,GO:0010468,GO:0010556,GO:…
GSADVT00043275001	6mA	GO:0000975,GO:0000976,GO:0001067,GO:0001158,GO:0001843,GO:0003279,GO:0003281,GO:0003674,GO:0003676,GO:0003677,GO:0005488,GO:0005515,GO:0005575,GO:0005667,GO:0006139,GO:0006351,GO:0006355,GO:0006357,GO:0006366,GO:0006725,GO:0006807,GO:0008134,GO:0008150,GO:0008152,GO:0008270,GO:0009058,GO:0009059,GO:0009889,GO:0009891,GO:0009893,GO:0009987,GO:0010453,GO:0010468,GO:0010556,GO:0010557,GO:0010604,GO:…
GSADVT00031097001	6mA	GO:0000975,GO:0001067,GO:0001555,GO:0001701,GO:0003006,GO:0003674,GO:0003676,GO:0003677,GO:0003824,GO:0005488,GO:0005515,GO:0005575,GO:0005634,GO:0005654,GO:0006139,GO:0006325,GO:0006342,GO:0006351,GO:0006355,GO:0006357,GO:0006464,GO:0006479,GO:0006725,GO:0006807,GO:0006996,GO:0007276,GO:0007281,GO:0007292,GO:0008150,GO:0008152,GO:0008168,GO:0008170,GO:0008213,GO:0008270,GO:0008276,GO:0008284,GO:…
GSADVT00011082001	6mA	GO:0000975,GO:0001067,GO:0002064,GO:0003006,GO:0003674,GO:0003676,GO:0003677,GO:0005488,GO:0005575,GO:0005634,GO:0005654,GO:0005737,GO:0006139,GO:0006325,GO:0006349,GO:0006351,GO:0006355,GO:0006357,GO:0006464,GO:0006479,GO:0006725,GO:0006807,GO:0006996,GO:0007276,GO:0007283,GO:0008150,GO:0008152,GO:0008213,GO:0009058,GO:0009059,GO:0009889,GO:0009891,GO:0009892,GO:0009893,GO:0009987,GO:0010467,GO:…
GSADVT00043105001	6mA	GO:0000975,GO:0001067,GO:0003674,GO:0003676,GO:0003677,GO:0003682,GO:0005488,GO:0005515,GO:0005575,GO:0005634,GO:0006139,GO:0006351,GO:0006355,GO:0006725,GO:0006807,GO:0006915,GO:0008150,GO:0008152,GO:0008219,GO:0009058,GO:0009059,GO:0009889,GO:0009891,GO:0009893,GO:0009987,GO:0010468,GO:0010556,GO:0010557,GO:0010604,GO:0010628,GO:0010941,GO:0012501,GO:0016070,GO:0016265,GO:0018130,GO:0019219,GO:…
GSADVT00020702001	6mA	GO:0000981,GO:0001071,GO:0003674,GO:0003676,GO:0003677,GO:0003700,GO:0005488,GO:0005575,GO:0005634,GO:0006139,GO:0006351,GO:0006355,GO:0006357,GO:0006725,GO:0006807,GO:0007275,GO:0008150,GO:0008152,GO:0009058,GO:0009059,GO:0009653,GO:0009889,GO:0009987,GO:0010468,GO:0010556,GO:0016070,GO:0018130,GO:0019219,GO:0019222,GO:0019438,GO:0030154,GO:0031323,GO:0031326,GO:0032501,GO:0032502,GO:0032774,GO:…
GSADVT00008898001	6mA	GO:0000981,GO:0001071,GO:0003674,GO:0003676,GO:0003677,GO:0003700,GO:0005488,GO:0005575,GO:0005634,GO:0006139,GO:0006351,GO:0006355,GO:0006357,GO:0006725,GO:0006807,GO:0008150,GO:0008152,GO:0009058,GO:0009059,GO:0009653,GO:0009889,GO:0009987,GO:0010468,GO:0010556,GO:0016070,GO:0018130,GO:0019219,GO:0019222,GO:0019438,GO:0030154,GO:0031323,GO:0031326,GO:0032502,GO:0032774,GO:0034641,GO:0034645,GO:…
GSADVT00034552001	6mA	GO:0000988,GO:0000989,GO:0003674,GO:0003676,GO:0003677,GO:0003712,GO:0003713,GO:0005488,GO:0005515,GO:0005575,GO:0005634,GO:0005737,GO:0006139,GO:0006351,GO:0006355,GO:0006725,GO:0006807,GO:0006810,GO:0006928,GO:0008134,GO:0008150,GO:0008152,GO:0009058,GO:0009059,GO:0009889,GO:0009987,GO:0010468,GO:0010556,GO:0014812,GO:0016070,GO:0016477,GO:0017025,GO:0018130,GO:0019219,GO:0019222,GO:0019438,GO:…
GSADVT00010674001	6mA	GO:0001071,GO:0001501,GO:0002230,GO:0002682,GO:0002697,GO:0002831,GO:0003674,GO:0003676,GO:0003677,GO:0003700,GO:0005488,GO:0005575,GO:0005634,GO:0005654,GO:0006139,GO:0006352,GO:0006355,GO:0006357,GO:0006367,GO:0006725,GO:0006807,GO:0007165,GO:0007517,GO:0008150,GO:0008152,GO:0009058,GO:0009059,GO:0009889,GO:0009987,GO:0010467,GO:0010468,GO:0010556,GO:0016070,GO:0018130,GO:0019219,GO:0019222,GO:…
GSADVT00017480001	6mA	GO:0001071,GO:0003674,GO:0003676,GO:0003677,GO:0003700,GO:0003707,GO:0004871,GO:0004872,GO:0005488,GO:0005496,GO:0005575,GO:0005634,GO:0006139,GO:0006351,GO:0006355,GO:0006725,GO:0006807,GO:0007165,GO:0008150,GO:0008152,GO:0008270,GO:0008289,GO:0009058,GO:0009059,GO:0009755,GO:0009889,GO:0009891,GO:0009893,GO:0009987,GO:0010468,GO:0010556,GO:0010557,GO:0010604,GO:0010628,GO:0016070,GO:0018130,GO:…
GSADVT00013017001	6mA	GO:0001071,GO:0003674,GO:0003676,GO:0003677,GO:0003700,GO:0004871,GO:0004872,GO:0004888,GO:0004930,GO:0004989,GO:0004993,GO:0005488,GO:0005575,GO:0005887,GO:0006140,GO:0007165,GO:0007166,GO:0007186,GO:0007187,GO:0007188,GO:0007189,GO:0007210,GO:0008150,GO:0008227,GO:0008582,GO:0009889,GO:0009891,GO:0009893,GO:0010562,GO:0010578,GO:0010579,GO:0016021,GO:0019219,GO:0019220,GO:0019222,GO:0030799,GO:…
GSADVT00025933001	6mA	GO:0001071,GO:0003674,GO:0003676,GO:0003677,GO:0003700,GO:0004871,GO:0004872,GO:0004888,GO:0004930,GO:0004989,GO:0004993,GO:0005488,GO:0005575,GO:0005887,GO:0006140,GO:0007165,GO:0007166,GO:0007186,GO:0007187,GO:0007188,GO:0007189,GO:0007210,GO:0008150,GO:0008227,GO:0008582,GO:0009889,GO:0009891,GO:0009893,GO:0010562,GO:0010578,GO:0010579,GO:0016021,GO:0019219,GO:0019220,GO:0019222,GO:0030799,GO:…
GSADVT00012262001	6mA	GO:0001071,GO:0003674,GO:0003676,GO:0003677,GO:0003700,GO:0005488,GO:0005575,GO:0005634,GO:0006139,GO:0006351,GO:0006355,GO:0006725,GO:0006807,GO:0006996,GO:0008150,GO:0008152,GO:0009058,GO:0009059,GO:0009653,GO:0009889,GO:0009987,GO:0010468,GO:0010556,GO:0010927,GO:0016043,GO:0016070,GO:0018130,GO:0019219,GO:0019222,GO:0019438,GO:0022607,GO:0030030,GO:0030031,GO:0031323,GO:0031326,GO:0032502,GO:…
GSADVT00017170001	6mA	GO:0001071,GO:0003674,GO:0003676,GO:0003677,GO:0003700,GO:0005488,GO:0005575,GO:0005634,GO:0006139,GO:0006351,GO:0006355,GO:0006725,GO:0006807,GO:0008150,GO:0008152,GO:0008283,GO:0009058,GO:0009059,GO:0009889,GO:0009890,GO:0009892,GO:0009987,GO:0010468,GO:0010556,GO:0010558,GO:0010605,GO:0010629,GO:0016070,GO:0018130,GO:0019219,GO:0019222,GO:0019438,GO:0030154,GO:0031323,GO:0031324,GO:0031326,GO:…
GSADVT00002160001	6mA	GO:0001071,GO:0003674,GO:0003676,GO:0003677,GO:0003700,GO:0005488,GO:0005575,GO:0005634,GO:0006139,GO:0006351,GO:0006355,GO:0006725,GO:0006807,GO:0008150,GO:0008152,GO:0009058,GO:0009059,GO:0009889,GO:0009987,GO:0010468,GO:0010556,GO:0016070,GO:0018130,GO:0019219,GO:0019222,GO:0019438,GO:0031323,GO:0031326,GO:0032774,GO:0034641,GO:0034645,GO:0034654,GO:0043170,GO:0043226,GO:0043227,GO:0043229,GO:…
GSADVT00008468001	6mA	GO:0001071,GO:0003674,GO:0003676,GO:0003677,GO:0003700,GO:0005488,GO:0005575,GO:0005634,GO:0006139,GO:0006351,GO:0006725,GO:0006807,GO:0007275,GO:0008150,GO:0008152,GO:0009058,GO:0009059,GO:0009987,GO:0016070,GO:0018130,GO:0019438,GO:0032501,GO:0032502,GO:0032774,GO:0034641,GO:0034645,GO:0034654,GO:0043170,GO:0043226,GO:0043227,GO:0043229,GO:0043231,GO:0043565,GO:0044237,GO:0044238,GO:0044249,GO:…
GSADVT00011769001	6mA	GO:0001071,GO:0003674,GO:0003676,GO:0003677,GO:0003700,GO:0005488,GO:0005575,GO:0005634,GO:0006355,GO:0007165,GO:0008150,GO:0008270,GO:0009755,GO:0009889,GO:0010468,GO:0010556,GO:0019219,GO:0019222,GO:0031323,GO:0031326,GO:0043167,GO:0043169,GO:0043226,GO:0043227,GO:0043229,GO:0043231,GO:0043401,GO:0043565,GO:0044424,GO:0044464,GO:0046872,GO:0046914,GO:0050789,GO:0050794,GO:0051171,GO:0051252,GO:…
GSADVT00000135001	6mA	GO:0001071,GO:0003674,GO:0003676,GO:0003677,GO:0003700,GO:0005488,GO:0005575,GO:0005634,GO:0006355,GO:0008150,GO:0008270,GO:0009889,GO:0010468,GO:0010556,GO:0019219,GO:0019222,GO:0031323,GO:0031326,GO:0043167,GO:0043169,GO:0043226,GO:0043227,GO:0043229,GO:0043231,GO:0043565,GO:0044424,GO:0044464,GO:0046872,GO:0046914,GO:0050789,GO:0050794,GO:0051171,GO:0051252,GO:0060255,GO:0065007,GO:0080090,GO:…
GSADVT00006914001	6mA	GO:0001071,GO:0003674,GO:0003676,GO:0003677,GO:0003700,GO:0005488,GO:0005575,GO:0005634,GO:0007275,GO:0008150,GO:0032501,GO:0032502,GO:0043226,GO:0043227,GO:0043229,GO:0043231,GO:0043565,GO:0044424,GO:0044464,GO:0044699,GO:0044707,GO:0044767,GO:0097159,GO:1901363
GSADVT00007449001	6mA	GO:0001071,GO:0003674,GO:0003700,GO:0005488,GO:0005543,GO:0005575,GO:0005737,GO:0005929,GO:0006355,GO:0006464,GO:0007165,GO:0008104,GO:0008150,GO:0008152,GO:0008289,GO:0009889,GO:0009987,GO:0010468,GO:0010556,GO:0016567,GO:0019219,GO:0019222,GO:0019538,GO:0031323,GO:0031326,GO:0032446,GO:0033036,GO:0033365,GO:0034613,GO:0035091,GO:0035556,GO:0036211,GO:0042995,GO:0043167,GO:0043168,GO:0043170,GO:…
GSADVT00032770001	6mA	GO:0001101,GO:0002218,GO:0002252,GO:0002253,GO:0002376,GO:0002682,GO:0002684,GO:0003674,GO:0004871,GO:0004872,GO:0004888,GO:0004970,GO:0005215,GO:0005216,GO:0005230,GO:0005231,GO:0005234,GO:0005261,GO:0005262,GO:0005575,GO:0005622,GO:0005886,GO:0006810,GO:0006811,GO:0006812,GO:0006816,GO:0006950,GO:0006952,GO:0006955,GO:0007165,GO:0008066,GO:0008150,GO:0008324,GO:0009605,GO:0009606,GO:0009607,GO:…
GSADVT00018456001	6mA	GO:0001101,GO:0002931,GO:0003008,GO:0003674,GO:0005215,GO:0005216,GO:0005253,GO:0005254,GO:0005310,GO:0005342,GO:0005488,GO:0005515,GO:0005575,GO:0005737,GO:0005886,GO:0005887,GO:0006461,GO:0006810,GO:0006811,GO:0006820,GO:0006821,GO:0006835,GO:0006873,GO:0006885,GO:0006950,GO:0007600,GO:0007605,GO:0008092,GO:0008150,GO:0008271,GO:0008272,GO:0008360,GO:0008361,GO:0008509,GO:0008514,GO:0008643,GO:…
GSADVT00017337001	6mA	GO:0001101,GO:0003674,GO:0004871,GO:0004872,GO:0004888,GO:0004970,GO:0005215,GO:0005216,GO:0005230,GO:0005231,GO:0005234,GO:0005261,GO:0005262,GO:0005575,GO:0005622,GO:0005886,GO:0006810,GO:0006811,GO:0006812,GO:0006816,GO:0007165,GO:0008066,GO:0008150,GO:0008324,GO:0009719,GO:0009987,GO:0010033,GO:0010243,GO:0015075,GO:0015085,GO:0015267,GO:0015276,GO:0016020,GO:0016021,GO:0019722,GO:0019932,GO:…
GSADVT00004117001	6mA	GO:0001101,GO:0003674,GO:0004872,GO:0005102,GO:0005488,GO:0005509,GO:0005515,GO:0005575,GO:0005615,GO:0005737,GO:0005768,GO:0005903,GO:0005905,GO:0006766,GO:0006810,GO:0006897,GO:0006898,GO:0007568,GO:0007584,GO:0008104,GO:0008150,GO:0008152,GO:0009314,GO:0009605,GO:0009628,GO:0009892,GO:0009914,GO:0009987,GO:0009991,GO:0010033,GO:0010165,GO:0010212,GO:0010466,GO:0010605,GO:0010817,GO:0010951,GO:…
GSADVT00063070001	6mA	GO:0001171,GO:0003674,GO:0003824,GO:0003964,GO:0004518,GO:0004519,GO:0004520,GO:0004536,GO:0005488,GO:0006139,GO:0006259,GO:0006260,GO:0006278,GO:0006310,GO:0006725,GO:0006807,GO:0008150,GO:0008152,GO:0009036,GO:0009058,GO:0009059,GO:0009987,GO:0015666,GO:0016740,GO:0016772,GO:0016779,GO:0016787,GO:0016788,GO:0016888,GO:0016893,GO:0032196,GO:0032197,GO:0032199,GO:0034061,GO:0034641,GO:0034645,GO:…
GSADVT00057198001	6mA	GO:0001172,GO:0002252,GO:0002376,GO:0003006,GO:0003674,GO:0003676,GO:0003723,GO:0003824,GO:0003887,GO:0003968,GO:0005488,GO:0005575,GO:0005634,GO:0006139,GO:0006396,GO:0006725,GO:0006807,GO:0006950,GO:0006952,GO:0006955,GO:0008037,GO:0008150,GO:0008152,GO:0009058,GO:0009059,GO:0009605,GO:0009607,GO:0009615,GO:0009616,GO:0009892,GO:0009987,GO:0010267,GO:0010468,GO:0010605,GO:0010608,GO:0010629,GO:…
GSADVT00005425001	6mA	GO:0001501,GO:0003674,GO:0003824,GO:0003993,GO:0005575,GO:0005765,GO:0005774,GO:0005775,GO:0006996,GO:0007033,GO:0007040,GO:0008150,GO:0009987,GO:0016020,GO:0016021,GO:0016043,GO:0016787,GO:0016788,GO:0016791,GO:0031090,GO:0031224,GO:0031974,GO:0031982,GO:0031988,GO:0032502,GO:0042578,GO:0043202,GO:0043226,GO:0043227,GO:0043230,GO:0043233,GO:0044421,GO:0044422,GO:0044424,GO:0044425,GO:0044437,GO:…
GSADVT00013862001	6mA	GO:0001501,GO:0003674,GO:0005488,GO:0005509,GO:0005515,GO:0005539,GO:0005540,GO:0005575,GO:0005576,GO:0005578,GO:0006022,GO:0006030,GO:0006040,GO:0006807,GO:0007155,GO:0007417,GO:0008061,GO:0008150,GO:0008152,GO:0022610,GO:0030246,GO:0031012,GO:0032502,GO:0043167,GO:0043169,GO:0043170,GO:0044421,GO:0046872,GO:0048731,GO:0048856,GO:0071704,GO:0097367,GO:1901071,GO:1901135,GO:1901564
GSADVT00026729001	6mA	GO:0001501,GO:0003674,GO:0005488,GO:0005515,GO:0005575,GO:0005615,GO:0007165,GO:0007166,GO:0007219,GO:0008150,GO:0008593,GO:0009791,GO:0009897,GO:0009966,GO:0009968,GO:0009987,GO:0010468,GO:0010646,GO:0010648,GO:0016021,GO:0019222,GO:0023051,GO:0023057,GO:0030154,GO:0031224,GO:0032501,GO:0032502,GO:0044421,GO:0044425,GO:0044459,GO:0044464,GO:0044699,GO:0044707,GO:0044763,GO:0044767,GO:0045746,GO:…
GSADVT00003232001	6mA	GO:0001504,GO:0001505,GO:0003674,GO:0005215,GO:0005326,GO:0005328,GO:0005329,GO:0005330,GO:0005488,GO:0005575,GO:0005887,GO:0006810,GO:0006811,GO:0006812,GO:0006820,GO:0006836,GO:0007610,GO:0007622,GO:0007623,GO:0008144,GO:0008150,GO:0008324,GO:0008504,GO:0008509,GO:0008519,GO:0009987,GO:0015075,GO:0015077,GO:0015081,GO:0015101,GO:0015103,GO:0015291,GO:0015293,GO:0015294,GO:0015370,GO:0015672,GO:…
GSADVT00035745001	6mA	GO:0001505,GO:0003674,GO:0003824,GO:0003990,GO:0004104,GO:0005575,GO:0005615,GO:0008150,GO:0008152,GO:0009056,GO:0009987,GO:0016787,GO:0016788,GO:0030054,GO:0042133,GO:0042135,GO:0044237,GO:0044248,GO:0044421,GO:0045202,GO:0052689,GO:0065007,GO:0065008
GSADVT00002703001	6mA	GO:0001505,GO:0003674,GO:0005215,GO:0005283,GO:0005294,GO:0005326,GO:0005328,GO:0005342,GO:0005343,GO:0005416,GO:0005575,GO:0005886,GO:0005887,GO:0006810,GO:0006811,GO:0006812,GO:0006820,GO:0006836,GO:0006865,GO:0007154,GO:0007267,GO:0007268,GO:0007269,GO:0007270,GO:0008150,GO:0008324,GO:0008509,GO:0008514,GO:0009987,GO:0015075,GO:0015077,GO:0015081,GO:0015171,GO:0015175,GO:0015179,GO:0015187,GO:…
GSADVT00001759001	6mA	GO:0001508,GO:0003008,GO:0003674,GO:0005215,GO:0005216,GO:0005244,GO:0005249,GO:0005251,GO:0005261,GO:0005267,GO:0005575,GO:0006461,GO:0006810,GO:0006811,GO:0006812,GO:0006813,GO:0007600,GO:0007606,GO:0007610,GO:0007611,GO:0007617,GO:0007619,GO:0007626,GO:0007629,GO:0007635,GO:0007637,GO:0008076,GO:0008150,GO:0008324,GO:0008344,GO:0008345,GO:0009314,GO:0009416,GO:0009581,GO:0009582,GO:0009583,GO:…
GSADVT00028254001	6mA	GO:0001516,GO:0003674,GO:0003824,GO:0004497,GO:0004796,GO:0005488,GO:0005506,GO:0005575,GO:0005789,GO:0006082,GO:0006629,GO:0006631,GO:0006633,GO:0006636,GO:0006690,GO:0006692,GO:0006693,GO:0008150,GO:0008152,GO:0008610,GO:0009058,GO:0009987,GO:0016020,GO:0016021,GO:0016053,GO:0016491,GO:0016705,GO:0016853,GO:0016860,GO:0019752,GO:0020037,GO:0031090,GO:0031224,GO:0032787,GO:0033559,GO:0043167,GO:…
GSADVT00034153001	6mA	GO:0001523,GO:0003008,GO:0003674,GO:0003824,GO:0005575,GO:0005788,GO:0006066,GO:0006629,GO:0006720,GO:0006721,GO:0007600,GO:0007601,GO:0008150,GO:0008152,GO:0009987,GO:0010817,GO:0016020,GO:0016101,GO:0016491,GO:0031974,GO:0032501,GO:0034308,GO:0034754,GO:0042445,GO:0042572,GO:0043233,GO:0044237,GO:0044238,GO:0044255,GO:0044281,GO:0044297,GO:0044422,GO:0044424,GO:0044432,GO:0044444,GO:0044446,GO:…
GSADVT00002144001	6mA	GO:0001525,GO:0001936,GO:0001938,GO:0003674,GO:0003824,GO:0004175,GO:0004197,GO:0004198,GO:0005488,GO:0005509,GO:0005515,GO:0005575,GO:0005634,GO:0005737,GO:0005768,GO:0005783,GO:0005789,GO:0006810,GO:0006886,GO:0006915,GO:0006919,GO:0006950,GO:0007165,GO:0007166,GO:0007167,GO:0007169,GO:0008104,GO:0008150,GO:0008152,GO:0008219,GO:0008233,GO:0008234,GO:0008284,GO:0009266,GO:0009408,GO:0009628,GO:…
GSADVT00028260001	6mA	GO:0001525,GO:0001990,GO:0003008,GO:0003044,GO:0003073,GO:0003081,GO:0003674,GO:0003824,GO:0004177,GO:0005488,GO:0005575,GO:0005765,GO:0005774,GO:0005886,GO:0005903,GO:0006518,GO:0006807,GO:0006928,GO:0008150,GO:0008152,GO:0008217,GO:0008233,GO:0008235,GO:0008237,GO:0008238,GO:0008270,GO:0008283,GO:0009056,GO:0009897,GO:0009987,GO:0016020,GO:0016021,GO:0016324,GO:0016477,GO:0016787,GO:0031090,GO:…
GSADVT00028981001	6mA	GO:0001525,GO:0003674,GO:0003824,GO:0004177,GO:0005488,GO:0005575,GO:0005737,GO:0005886,GO:0006508,GO:0006518,GO:0006725,GO:0006807,GO:0008150,GO:0008152,GO:0008233,GO:0008235,GO:0008237,GO:0008238,GO:0008270,GO:0009056,GO:0009987,GO:0012506,GO:0016020,GO:0016021,GO:0016787,GO:0019538,GO:0030154,GO:0031090,GO:0031224,GO:0031974,GO:0031983,GO:0032502,GO:0032844,GO:0032845,GO:0032879,GO:0033218,GO:…
GSADVT00030252001	6mA	GO:0001525,GO:0003674,GO:0005096,GO:0005575,GO:0005737,GO:0005856,GO:0005912,GO:0005924,GO:0005925,GO:0006928,GO:0007165,GO:0008047,GO:0008150,GO:0009966,GO:0009968,GO:0009987,GO:0010646,GO:0010648,GO:0016477,GO:0023051,GO:0023057,GO:0030054,GO:0030055,GO:0030154,GO:0030234,GO:0030695,GO:0031344,GO:0031345,GO:0032502,GO:0035020,GO:0035021,GO:0035313,GO:0040011,GO:0042995,GO:0043226,GO:0043228,GO:…
GSADVT00054328001	6mA	GO:0001530,GO:0001817,GO:0002218,GO:0002221,GO:0002224,GO:0002253,GO:0002376,GO:0002682,GO:0002684,GO:0002697,GO:0002700,GO:0002718,GO:0002757,GO:0002758,GO:0002764,GO:0003674,GO:0005488,GO:0005515,GO:0005575,GO:0006950,GO:0006952,GO:0006954,GO:0006955,GO:0007165,GO:0008150,GO:0008289,GO:0031347,GO:0031349,GO:0032991,GO:0034142,GO:0043234,GO:0043235,GO:0044425,GO:0045087,GO:0045088,GO:0045089,GO:…
GSADVT00006654001	6mA	GO:0001533,GO:0003674,GO:0003810,GO:0003824,GO:0005488,GO:0005575,GO:0005886,GO:0006464,GO:0008150,GO:0008152,GO:0009913,GO:0009987,GO:0016020,GO:0016043,GO:0016740,GO:0016746,GO:0016755,GO:0018149,GO:0019538,GO:0030154,GO:0030216,GO:0030855,GO:0031224,GO:0031424,GO:0031982,GO:0031988,GO:0032501,GO:0032502,GO:0036211,GO:0043163,GO:0043167,GO:0043169,GO:0043170,GO:0043226,GO:0043227,GO:0043230,GO:…
GSADVT00008655001	6mA	GO:0001588,GO:0001963,GO:0003008,GO:0003674,GO:0004871,GO:0004872,GO:0004888,GO:0004930,GO:0004952,GO:0005488,GO:0005575,GO:0007154,GO:0007165,GO:0007166,GO:0007186,GO:0007187,GO:0007188,GO:0007189,GO:0007191,GO:0007200,GO:0007212,GO:0007267,GO:0007268,GO:0007270,GO:0007610,GO:0007611,GO:0007612,GO:0008150,GO:0009987,GO:0016021,GO:0023052,GO:0030285,GO:0030594,GO:0031224,GO:0031300,GO:0031301,GO:…
GSADVT00019391001	6mA	GO:0001649,GO:0003674,GO:0003676,GO:0003723,GO:0003824,GO:0004518,GO:0005488,GO:0005575,GO:0005634,GO:0005739,GO:0006139,GO:0006351,GO:0006355,GO:0006725,GO:0006807,GO:0008150,GO:0008152,GO:0009058,GO:0009059,GO:0009889,GO:0009892,GO:0009987,GO:0010468,GO:0010556,GO:0010605,GO:0010629,GO:0016020,GO:0016023,GO:0016070,GO:0016442,GO:0016458,GO:0016787,GO:0016788,GO:0018130,GO:0019219,GO:0019222,GO:…
GSADVT00002736001	6mA	GO:0001653,GO:0003674,GO:0004871,GO:0004872,GO:0004888,GO:0004930,GO:0005575,GO:0005886,GO:0007165,GO:0007166,GO:0007186,GO:0007610,GO:0007621,GO:0008150,GO:0008528,GO:0016020,GO:0016021,GO:0019098,GO:0022414,GO:0031224,GO:0032501,GO:0033057,GO:0038023,GO:0043900,GO:0044425,GO:0044464,GO:0044703,GO:0044705,GO:0044706,GO:0045434,GO:0045924,GO:0046008,GO:0046662,GO:0048042,GO:0048583,GO:0048609,GO:…
GSADVT00046873001	6mA	GO:0001654,GO:0003674,GO:0003676,GO:0003677,GO:0005488,GO:0005575,GO:0005634,GO:0006139,GO:0006351,GO:0006355,GO:0006725,GO:0006807,GO:0007423,GO:0008150,GO:0008152,GO:0009058,GO:0009059,GO:0009653,GO:0009889,GO:0009987,GO:0010468,GO:0010556,GO:0016070,GO:0018130,GO:0019219,GO:0019222,GO:0019438,GO:0031323,GO:0031326,GO:0032502,GO:0032774,GO:0034641,GO:0034645,GO:0034654,GO:0043010,GO:0043167,GO:…
GSADVT00010693001	6mA	GO:0001662,GO:0001701,GO:0001964,GO:0001967,GO:0002209,GO:0003008,GO:0003674,GO:0004871,GO:0004872,GO:0004888,GO:0004970,GO:0004972,GO:0005215,GO:0005216,GO:0005230,GO:0005231,GO:0005234,GO:0005261,GO:0005262,GO:0005488,GO:0005575,GO:0005886,GO:0006810,GO:0006811,GO:0006812,GO:0006816,GO:0006950,GO:0006952,GO:0007154,GO:0007165,GO:0007166,GO:0007215,GO:0007267,GO:0007268,GO:0007423,GO:0007610,GO:…
GSADVT00008500001	6mA	GO:0001664,GO:0003674,GO:0005085,GO:0005088,GO:0005089,GO:0005096,GO:0005102,GO:0005488,GO:0005515,GO:0005575,GO:0005737,GO:0007165,GO:0007166,GO:0007186,GO:0008047,GO:0008150,GO:0009966,GO:0010646,GO:0016020,GO:0023051,GO:0030234,GO:0030695,GO:0031982,GO:0031988,GO:0035023,GO:0035556,GO:0043226,GO:0043227,GO:0043230,GO:0044421,GO:0044424,GO:0044464,GO:0046578,GO:0048583,GO:0050789,GO:0050794,GO:…
GSADVT00012251001	6mA	GO:0001666,GO:0002009,GO:0003674,GO:0003824,GO:0004089,GO:0005488,GO:0005575,GO:0005886,GO:0006730,GO:0006810,GO:0006950,GO:0008150,GO:0008152,GO:0008270,GO:0009628,GO:0009653,GO:0009719,GO:0009725,GO:0009987,GO:0010033,GO:0014070,GO:0016020,GO:0016021,GO:0016323,GO:0016829,GO:0016835,GO:0016836,GO:0031224,GO:0031253,GO:0031528,GO:0032502,GO:0033574,GO:0033993,GO:0036293,GO:0042221,GO:0042493,GO:…
GSADVT00038851001	6mA	GO:0001709,GO:0002065,GO:0002067,GO:0003674,GO:0003676,GO:0003677,GO:0005488,GO:0005575,GO:0005634,GO:0006139,GO:0006351,GO:0006355,GO:0006725,GO:0006807,GO:0008150,GO:0008152,GO:0009058,GO:0009059,GO:0009889,GO:0009987,GO:0010468,GO:0010556,GO:0016070,GO:0018130,GO:0019219,GO:0019222,GO:0019438,GO:0030154,GO:0030855,GO:0030856,GO:0030857,GO:0031323,GO:0031326,GO:0032502,GO:0032774,GO:0034641,GO:…
GSADVT00007309001	6mA	GO:0001726,GO:0001885,GO:0002064,GO:0003674,GO:0003676,GO:0003723,GO:0003779,GO:0005488,GO:0005515,GO:0005575,GO:0005615,GO:0005737,GO:0005856,GO:0005886,GO:0005902,GO:0005912,GO:0005924,GO:0005925,GO:0007162,GO:0007346,GO:0008064,GO:0008092,GO:0008104,GO:0008105,GO:0008150,GO:0008360,GO:0008361,GO:0009719,GO:0009725,GO:0009892,GO:0009893,GO:0009894,GO:0009896,GO:0009987,GO:0010033,GO:0010468,GO:…
GSADVT00040606001	6mA	GO:0001731,GO:0003674,GO:0003676,GO:0003723,GO:0003743,GO:0005488,GO:0005515,GO:0005575,GO:0005852,GO:0006413,GO:0006417,GO:0006446,GO:0008135,GO:0008150,GO:0008152,GO:0009889,GO:0009987,GO:0010468,GO:0010556,GO:0010608,GO:0016043,GO:0016282,GO:0019222,GO:0022607,GO:0022618,GO:0030529,GO:0031323,GO:0031326,GO:0031369,GO:0032268,GO:0032991,GO:0033290,GO:0034622,GO:0043021,GO:0043022,GO:0043234,GO:…
GSADVT00014078001	6mA	GO:0001763,GO:0002009,GO:0002070,GO:0003006,GO:0003674,GO:0003824,GO:0004842,GO:0005102,GO:0005123,GO:0005126,GO:0005488,GO:0005515,GO:0005575,GO:0005634,GO:0005654,GO:0005737,GO:0006464,GO:0006915,GO:0008150,GO:0008152,GO:0008219,GO:0009653,GO:0009966,GO:0009987,GO:0010564,GO:0010646,GO:0010941,GO:0012501,GO:0016265,GO:0016567,GO:0016740,GO:0019222,GO:0019538,GO:0019787,GO:0021700,GO:0022414,GO:…
GSADVT00016866001	6mA	GO:0001775,GO:0001923,GO:0001932,GO:0002252,GO:0002263,GO:0002285,GO:0002312,GO:0002322,GO:0002335,GO:0002337,GO:0002366,GO:0002376,GO:0002521,GO:0002682,GO:0002683,GO:0003674,GO:0003824,GO:0004435,GO:0004620,GO:0004629,GO:0004871,GO:0005102,GO:0005488,GO:0005515,GO:0005575,GO:0005737,GO:0006521,GO:0006629,GO:0007165,GO:0007166,GO:0007186,GO:0007214,GO:0008081,GO:0008150,GO:0008152,GO:0008283,GO:…
GSADVT00039698001	6mA	GO:0001786,GO:0003674,GO:0005488,GO:0005509,GO:0005543,GO:0005544,GO:0005575,GO:0005615,GO:0005654,GO:0005886,GO:0008289,GO:0016020,GO:0031982,GO:0031988,GO:0043167,GO:0043168,GO:0043169,GO:0043226,GO:0043227,GO:0043230,GO:0044421,GO:0044422,GO:0044424,GO:0044428,GO:0044446,GO:0044464,GO:0046872,GO:0065010,GO:0070062,GO:0072341,GO:0097367,GO:1901611,GO:1903561
GSADVT00029148001	6mA	GO:0001816,GO:0001817,GO:0001819,GO:0002831,GO:0003674,GO:0003676,GO:0003723,GO:0003824,GO:0005488,GO:0005575,GO:0005615,GO:0005634,GO:0005730,GO:0005737,GO:0006139,GO:0006355,GO:0006396,GO:0006401,GO:0006725,GO:0006807,GO:0007165,GO:0007166,GO:0008150,GO:0008152,GO:0008270,GO:0009056,GO:0009057,GO:0009889,GO:0009966,GO:0009987,GO:0010468,GO:0010556,GO:0010586,GO:0010587,GO:0010646,GO:0016070,GO:…
GSADVT00001228001	6mA	GO:0001817,GO:0001819,GO:0003674,GO:0005488,GO:0005515,GO:0005575,GO:0005634,GO:0006355,GO:0008134,GO:0008150,GO:0009889,GO:0010468,GO:0010556,GO:0019219,GO:0019222,GO:0031323,GO:0031326,GO:0031347,GO:0031349,GO:0032101,GO:0032103,GO:0043226,GO:0043227,GO:0043229,GO:0043231,GO:0044093,GO:0044424,GO:0044464,GO:0048518,GO:0048583,GO:0048584,GO:0050727,GO:0050729,GO:0050789,GO:0050794,GO:0051059,GO:…
GSADVT00010637001	6mA	GO:0001817,GO:0002682,GO:0002683,GO:0005575,GO:0005634,GO:0005829,GO:0008150,GO:0009966,GO:0009968,GO:0010646,GO:0010648,GO:0023051,GO:0023057,GO:0031982,GO:0031988,GO:0043226,GO:0043227,GO:0043229,GO:0043230,GO:0043231,GO:0044421,GO:0044424,GO:0044444,GO:0044464,GO:0048519,GO:0048523,GO:0048583,GO:0048585,GO:0050789,GO:0050794,GO:0050854,GO:0050856,GO:0050858,GO:0050860,GO:0051239,GO:0065007,GO:…
GSADVT00005113001	6mA	GO:0001822,GO:0001947,GO:0002009,GO:0003143,GO:0003279,GO:0003283,GO:0003341,GO:0003351,GO:0003674,GO:0003824,GO:0003956,GO:0005488,GO:0005515,GO:0005575,GO:0005576,GO:0005829,GO:0005929,GO:0005975,GO:0006464,GO:0006471,GO:0006486,GO:0006928,GO:0006996,GO:0007017,GO:0007018,GO:0007165,GO:0007166,GO:0007368,GO:0007389,GO:0008150,GO:0008152,GO:0009405,GO:0009653,GO:0009799,GO:0009855,GO:0009887,GO:…
GSADVT00048053001	6mA	GO:0001822,GO:0001947,GO:0002009,GO:0003143,GO:0003279,GO:0003283,GO:0003341,GO:0003351,GO:0003674,GO:0003824,GO:0003956,GO:0005488,GO:0005515,GO:0005575,GO:0005576,GO:0005829,GO:0005929,GO:0005975,GO:0006464,GO:0006471,GO:0006486,GO:0006928,GO:0006996,GO:0007017,GO:0007018,GO:0007165,GO:0007166,GO:0007368,GO:0007389,GO:0008150,GO:0008152,GO:0009405,GO:0009653,GO:0009799,GO:0009855,GO:0009887,GO:…
GSADVT00040637001	6mA	GO:0001822,GO:0003008,GO:0003674,GO:0005215,GO:0005575,GO:0005886,GO:0006629,GO:0006720,GO:0006721,GO:0006810,GO:0006811,GO:0006812,GO:0006813,GO:0006814,GO:0006820,GO:0006821,GO:0006950,GO:0006970,GO:0006972,GO:0007588,GO:0008150,GO:0008152,GO:0008324,GO:0008509,GO:0008511,GO:0009628,GO:0009651,GO:0009966,GO:0009967,GO:0009986,GO:0009987,GO:0010646,GO:0010647,GO:0015075,GO:0015103,GO:0015108,GO:…
GSADVT00007047001	6mA	GO:0001871,GO:0002376,GO:0003674,GO:0003824,GO:0004872,GO:0005044,GO:0005488,GO:0005575,GO:0005615,GO:0006508,GO:0006955,GO:0007155,GO:0008150,GO:0008152,GO:0008233,GO:0008234,GO:0016787,GO:0019538,GO:0022610,GO:0030246,GO:0030247,GO:0038024,GO:0043170,GO:0044238,GO:0044421,GO:0050896,GO:0060089,GO:0070011,GO:0071704
GSADVT00010088001	6mA	GO:0001882,GO:0001883,GO:0003674,GO:0003824,GO:0003950,GO:0004857,GO:0005488,GO:0006139,GO:0006725,GO:0006807,GO:0008150,GO:0008152,GO:0008428,GO:0009116,GO:0009892,GO:0009987,GO:0010605,GO:0016740,GO:0016757,GO:0016763,GO:0016787,GO:0019213,GO:0019219,GO:0019222,GO:0030234,GO:0031323,GO:0031324,GO:0032069,GO:0032074,GO:0034641,GO:0036094,GO:0042278,GO:0043086,GO:0044092,GO:0044237,GO:0044238,GO:…
GSADVT00035781001	6mA	GO:0001889,GO:0003674,GO:0003824,GO:0003985,GO:0003988,GO:0005488,GO:0005575,GO:0005739,GO:0005743,GO:0005759,GO:0006461,GO:0006950,GO:0007420,GO:0008150,GO:0008152,GO:0009605,GO:0009719,GO:0009725,GO:0009888,GO:0009991,GO:0010033,GO:0014070,GO:0016020,GO:0016043,GO:0016407,GO:0016408,GO:0016453,GO:0016740,GO:0016746,GO:0016747,GO:0019866,GO:0022607,GO:0031090,GO:0031667,GO:0031966,GO:0031974,GO:…
GSADVT00000638001	6mA	GO:0001932,GO:0001933,GO:0003674,GO:0003824,GO:0004721,GO:0004722,GO:0005488,GO:0005575,GO:0005654,GO:0006464,GO:0006470,GO:0006793,GO:0006796,GO:0006950,GO:0006984,GO:0007165,GO:0007346,GO:0008150,GO:0008152,GO:0008420,GO:0009892,GO:0009987,GO:0010563,GO:0010564,GO:0010605,GO:0010948,GO:0016311,GO:0016787,GO:0016788,GO:0016791,GO:0019220,GO:0019222,GO:0019538,GO:0030968,GO:0031323,GO:0031324,GO:…
GSADVT00062445001	6mA	GO:0001965,GO:0003674,GO:0005215,GO:0005216,GO:0005261,GO:0005262,GO:0005488,GO:0005509,GO:0005515,GO:0005575,GO:0006810,GO:0006811,GO:0006812,GO:0006816,GO:0008150,GO:0008324,GO:0009581,GO:0009582,GO:0009605,GO:0009612,GO:0009628,GO:0009987,GO:0015075,GO:0015085,GO:0015267,GO:0016020,GO:0016021,GO:0022803,GO:0022838,GO:0022857,GO:0022890,GO:0022891,GO:0022892,GO:0030001,GO:0030246,GO:0031224,GO:…
GSADVT00008340001	6mA	GO:0002021,GO:0003674,GO:0005488,GO:0005515,GO:0005543,GO:0005575,GO:0005737,GO:0005886,GO:0005905,GO:0006810,GO:0006897,GO:0007009,GO:0008017,GO:0008092,GO:0008150,GO:0008289,GO:0009605,GO:0009987,GO:0009991,GO:0015631,GO:0016020,GO:0016023,GO:0016043,GO:0016192,GO:0017124,GO:0019904,GO:0030100,GO:0030119,GO:0030122,GO:0030131,GO:0030135,GO:0030136,GO:0031410,GO:0031667,GO:0031982,GO:0031988,GO:…
GSADVT00037484001	6mA	GO:0002115,GO:0003674,GO:0005215,GO:0005216,GO:0005261,GO:0005262,GO:0005575,GO:0005886,GO:0005887,GO:0006810,GO:0006811,GO:0006812,GO:0006816,GO:0007399,GO:0008150,GO:0008324,GO:0010959,GO:0015075,GO:0015085,GO:0015267,GO:0015276,GO:0015279,GO:0016020,GO:0016021,GO:0022803,GO:0022834,GO:0022836,GO:0022838,GO:0022857,GO:0022890,GO:0022891,GO:0022892,GO:0030001,GO:0031224,GO:0031226,GO:0032386,GO:…
GSADVT00004642001	6mA	GO:0002178,GO:0003674,GO:0003824,GO:0004758,GO:0005488,GO:0005575,GO:0005789,GO:0006629,GO:0006643,GO:0006665,GO:0006807,GO:0008150,GO:0008152,GO:0008610,GO:0009058,GO:0009987,GO:0016020,GO:0016021,GO:0016408,GO:0016409,GO:0016454,GO:0016740,GO:0016746,GO:0016747,GO:0017059,GO:0030148,GO:0030170,GO:0031090,GO:0031211,GO:0031224,GO:0032991,GO:0043167,GO:0043168,GO:0043234,GO:0044237,GO:0044238,GO:…
GSADVT00005973001	6mA	GO:0002237,GO:0003674,GO:0003824,GO:0003840,GO:0005575,GO:0005615,GO:0005886,GO:0005887,GO:0006082,GO:0006518,GO:0006520,GO:0006536,GO:0006575,GO:0006749,GO:0006750,GO:0006751,GO:0006790,GO:0006807,GO:0006950,GO:0006979,GO:0007568,GO:0008150,GO:0008152,GO:0008233,GO:0008238,GO:0008242,GO:0009056,GO:0009058,GO:0009064,GO:0009605,GO:0009607,GO:0009719,GO:0009725,GO:0009987,GO:0010033,GO:0014070,GO:…
GSADVT00042073001	6mA	GO:0002244,GO:0003674,GO:0003824,GO:0003841,GO:0005575,GO:0005635,GO:0005739,GO:0005741,GO:0005789,GO:0006629,GO:0006638,GO:0006639,GO:0006641,GO:0006644,GO:0006650,GO:0006654,GO:0006793,GO:0006796,GO:0008150,GO:0008152,GO:0008374,GO:0008610,GO:0008654,GO:0009058,GO:0009987,GO:0016020,GO:0016021,GO:0016024,GO:0016411,GO:0016740,GO:0016746,GO:0016747,GO:0019432,GO:0019637,GO:0019867,GO:0030154,GO:…
GSADVT00049799001	6mA	GO:0002253,GO:0002376,GO:0002429,GO:0002682,GO:0002684,GO:0002757,GO:0002764,GO:0002768,GO:0003674,GO:0003824,GO:0004721,GO:0004725,GO:0005575,GO:0006464,GO:0006470,GO:0006793,GO:0006796,GO:0007165,GO:0007166,GO:0008150,GO:0008152,GO:0009987,GO:0016021,GO:0016311,GO:0016787,GO:0016788,GO:0016791,GO:0019538,GO:0031224,GO:0036211,GO:0042578,GO:0043170,GO:0043412,GO:0044237,GO:0044238,GO:0044260,GO:…
GSADVT00057621001	6mA	GO:0002376,GO:0003008,GO:0003013,GO:0003018,GO:0003674,GO:0004871,GO:0004872,GO:0004888,GO:0004930,GO:0004969,GO:0005575,GO:0005887,GO:0006928,GO:0006935,GO:0006950,GO:0006952,GO:0006954,GO:0007165,GO:0007166,GO:0007186,GO:0007200,GO:0008150,GO:0008227,GO:0009719,GO:0009987,GO:0010033,GO:0010243,GO:0010646,GO:0014070,GO:0016021,GO:0016477,GO:0019229,GO:0023051,GO:0030595,GO:0031224,GO:0031226,GO:…
GSADVT00031611001	6mA	GO:0002376,GO:0005575,GO:0005737,GO:0006914,GO:0006915,GO:0006950,GO:0006952,GO:0006955,GO:0008150,GO:0008152,GO:0008219,GO:0009056,GO:0009987,GO:0012501,GO:0016020,GO:0016265,GO:0031090,GO:0034045,GO:0044237,GO:0044248,GO:0044422,GO:0044424,GO:0044444,GO:0044464,GO:0044699,GO:0044763,GO:0045087,GO:0050896,GO:0098588
GSADVT00026833001	6mA	GO:0002521,GO:0002573,GO:0003674,GO:0005085,GO:0005088,GO:0005089,GO:0005575,GO:0005737,GO:0005829,GO:0005856,GO:0006461,GO:0006996,GO:0007010,GO:0007155,GO:0007165,GO:0007166,GO:0007264,GO:0007265,GO:0008150,GO:0009893,GO:0009966,GO:0009987,GO:0010646,GO:0016043,GO:0016322,GO:0016601,GO:0019222,GO:0019898,GO:0021700,GO:0022607,GO:0022610,GO:0023051,GO:0030029,GO:0030036,GO:0030099,GO:0030154,GO:…
GSADVT00028609001	6mA	GO:0002682,GO:0002684,GO:0005575,GO:0006950,GO:0006952,GO:0008150,GO:0009605,GO:0009607,GO:0009617,GO:0016021,GO:0031224,GO:0031347,GO:0031349,GO:0042742,GO:0043207,GO:0044425,GO:0045088,GO:0045089,GO:0048518,GO:0048583,GO:0048584,GO:0050776,GO:0050778,GO:0050789,GO:0050829,GO:0050896,GO:0051704,GO:0051707,GO:0065007,GO:0080134,GO:0098542
GSADVT00002952001	6mA	GO:0002682,GO:0003674,GO:0005488,GO:0005575,GO:0005789,GO:0005811,GO:0008150,GO:0008152,GO:0012505,GO:0016020,GO:0016021,GO:0020037,GO:0031090,GO:0031224,GO:0035206,GO:0042127,GO:0043167,GO:0043169,GO:0043226,GO:0043228,GO:0043229,GO:0043232,GO:0044422,GO:0044424,GO:0044425,GO:0044432,GO:0044444,GO:0044446,GO:0044464,GO:0044699,GO:0044710,GO:0045595,GO:0045610,GO:0046872,GO:0046906,GO:0050789,GO:…
GSADVT00004488001	6mA	GO:0003002,GO:0003674,GO:0005488,GO:0005515,GO:0005575,GO:0005887,GO:0007165,GO:0007166,GO:0007365,GO:0007367,GO:0007389,GO:0008150,GO:0008587,GO:0009653,GO:0009886,GO:0009966,GO:0009967,GO:0010646,GO:0010647,GO:0016021,GO:0016055,GO:0017147,GO:0023051,GO:0023056,GO:0030054,GO:0030111,GO:0030177,GO:0030285,GO:0031224,GO:0031226,GO:0031227,GO:0031228,GO:0031300,GO:0031301,GO:0031302,GO:0031594,GO:…
GSADVT00002026001	6mA	GO:0003006,GO:0003674,GO:0003824,GO:0004721,GO:0004725,GO:0006464,GO:0006470,GO:0006793,GO:0006796,GO:0006950,GO:0008138,GO:0008150,GO:0008152,GO:0009605,GO:0009987,GO:0009991,GO:0016311,GO:0016787,GO:0016788,GO:0016791,GO:0019538,GO:0022414,GO:0030582,GO:0030587,GO:0031667,GO:0032502,GO:0036211,GO:0042221,GO:0042578,GO:0042594,GO:0043170,GO:0043412,GO:0044237,GO:0044238,GO:0044260,GO:0044267,GO:…
GSADVT00027380001	6mA	GO:0003006,GO:0005575,GO:0006139,GO:0006259,GO:0006304,GO:0006305,GO:0006306,GO:0006725,GO:0006807,GO:0006996,GO:0007281,GO:0007286,GO:0008150,GO:0008152,GO:0009987,GO:0010468,GO:0016043,GO:0019222,GO:0022412,GO:0022414,GO:0030529,GO:0030719,GO:0032259,GO:0032502,GO:0032991,GO:0033391,GO:0034641,GO:0035770,GO:0036464,GO:0040029,GO:0043046,GO:0043170,GO:0043186,GO:0043226,GO:0043228,GO:0043229,GO:…
GSADVT00031592001	6mA	GO:0003008,GO:0003012,GO:0003674,GO:0004871,GO:0004872,GO:0004888,GO:0004930,GO:0004993,GO:0005575,GO:0005887,GO:0005901,GO:0006936,GO:0006939,GO:0007165,GO:0007166,GO:0007186,GO:0007610,GO:0008150,GO:0008227,GO:0010646,GO:0016020,GO:0016021,GO:0016023,GO:0023051,GO:0030424,GO:0031224,GO:0031226,GO:0031410,GO:0031982,GO:0031988,GO:0032501,GO:0032879,GO:0038023,GO:0042995,GO:0043005,GO:0043198,GO:…
GSADVT00041534001	6mA	GO:0003008,GO:0003012,GO:0003674,GO:0005198,GO:0005488,GO:0005509,GO:0005575,GO:0005829,GO:0005859,GO:0006936,GO:0006937,GO:0008150,GO:0008307,GO:0016459,GO:0016460,GO:0032501,GO:0032991,GO:0043167,GO:0043169,GO:0043234,GO:0044057,GO:0044422,GO:0044424,GO:0044430,GO:0044444,GO:0044446,GO:0044449,GO:0044464,GO:0044699,GO:0044707,GO:0046872,GO:0050789,GO:0051239,GO:0065007,GO:0090257
GSADVT00032628001	6mA	GO:0003008,GO:0003674,GO:0003824,GO:0004112,GO:0004114,GO:0005575,GO:0005634,GO:0005737,GO:0007600,GO:0007601,GO:0008081,GO:0008150,GO:0016787,GO:0016788,GO:0032501,GO:0042578,GO:0043226,GO:0043227,GO:0043229,GO:0043231,GO:0044424,GO:0044464,GO:0044699,GO:0044707,GO:0050877,GO:0050953
GSADVT00019626001	6mA	GO:0003008,GO:0003674,GO:0005215,GO:0005216,GO:0005244,GO:0005249,GO:0005250,GO:0005261,GO:0005267,GO:0005575,GO:0005886,GO:0006461,GO:0006810,GO:0006811,GO:0006812,GO:0006813,GO:0007154,GO:0007267,GO:0007268,GO:0007610,GO:0007611,GO:0007612,GO:0008076,GO:0008150,GO:0008306,GO:0008324,GO:0009987,GO:0015075,GO:0015077,GO:0015079,GO:0015267,GO:0015271,GO:0015672,GO:0016020,GO:0016043,GO:0022607,GO:…
GSADVT00015548001	6mA	GO:0003008,GO:0003674,GO:0005215,GO:0005216,GO:0005244,GO:0005249,GO:0005251,GO:0005261,GO:0005267,GO:0005488,GO:0005575,GO:0005576,GO:0005737,GO:0006810,GO:0006811,GO:0006812,GO:0006813,GO:0006869,GO:0007600,GO:0007605,GO:0008076,GO:0008150,GO:0008152,GO:0008289,GO:0008324,GO:0009653,GO:0009925,GO:0010646,GO:0010648,GO:0015075,GO:0015077,GO:0015079,GO:0015267,GO:0015672,GO:0016020,GO:0016021,GO:…
GSADVT00001391001	6mA	GO:0003674,GO:0003676,GO:0003677,GO:0003723,GO:0005488,GO:0005575,GO:0005654,GO:0005681,GO:0005737,GO:0006139,GO:0006351,GO:0006355,GO:0006396,GO:0006397,GO:0006725,GO:0006807,GO:0008150,GO:0008152,GO:0008380,GO:0009058,GO:0009059,GO:0009889,GO:0009987,GO:0010468,GO:0010556,GO:0016070,GO:0016071,GO:0018130,GO:0019219,GO:0019222,GO:0019438,GO:0030529,GO:0031323,GO:0031326,GO:0032774,GO:0032991,GO:…
GSADVT00013984001	6mA	GO:0003674,GO:0003676,GO:0003677,GO:0003824,GO:0003909,GO:0003910,GO:0003950,GO:0005488,GO:0005575,GO:0005634,GO:0005654,GO:0005730,GO:0005737,GO:0005975,GO:0006139,GO:0006259,GO:0006266,GO:0006271,GO:0006273,GO:0006281,GO:0006284,GO:0006464,GO:0006471,GO:0006486,GO:0006725,GO:0006807,GO:0006950,GO:0006974,GO:0007165,GO:0007166,GO:0008150,GO:0008152,GO:0009987,GO:0016070,GO:0016740,GO:0016757,GO:…
GSADVT00049432001	6mA	GO:0003674,GO:0003676,GO:0003677,GO:0003824,GO:0005488,GO:0005515,GO:0005575,GO:0005654,GO:0006139,GO:0006351,GO:0006355,GO:0006725,GO:0006807,GO:0008150,GO:0008152,GO:0008270,GO:0009058,GO:0009059,GO:0009889,GO:0009987,GO:0010468,GO:0010556,GO:0016070,GO:0016491,GO:0016705,GO:0016706,GO:0018130,GO:0019219,GO:0019222,GO:0019438,GO:0031323,GO:0031326,GO:0032451,GO:0032452,GO:0032774,GO:0034641,GO:…
GSADVT00008259001	6mA	GO:0003674,GO:0003676,GO:0003677,GO:0003824,GO:0005488,GO:0005975,GO:0005996,GO:0006012,GO:0006139,GO:0006351,GO:0006355,GO:0006725,GO:0006807,GO:0008150,GO:0008152,GO:0009058,GO:0009059,GO:0009889,GO:0009987,GO:0010468,GO:0010556,GO:0016070,GO:0016491,GO:0018130,GO:0019219,GO:0019222,GO:0019318,GO:0019438,GO:0031323,GO:0031326,GO:0032774,GO:0034641,GO:0034645,GO:0034654,GO:0043170,GO:0044237,GO:…
GSADVT00031496001	6mA	GO:0003674,GO:0003676,GO:0003677,GO:0003824,GO:0005488,GO:0008233,GO:0016787,GO:0097159,GO:1901363
GSADVT00004340001	6mA	GO:0003674,GO:0003676,GO:0003677,GO:0005488,GO:0005575,GO:0005634,GO:0005654,GO:0005737,GO:0005783,GO:0005829,GO:0006325,GO:0006334,GO:0006355,GO:0006461,GO:0008150,GO:0009889,GO:0009890,GO:0009892,GO:0010468,GO:0010556,GO:0010558,GO:0010605,GO:0010629,GO:0010941,GO:0016043,GO:0019219,GO:0019222,GO:0022607,GO:0031323,GO:0031324,GO:0031326,GO:0031327,GO:0032991,GO:0034622,GO:0034728,GO:0042981,GO:…
GSADVT00031644001	6mA	GO:0003674,GO:0003676,GO:0003677,GO:0005488,GO:0005575,GO:0005634,GO:0005737,GO:0005819,GO:0043226,GO:0043227,GO:0043228,GO:0043229,GO:0043231,GO:0043232,GO:0044422,GO:0044424,GO:0044430,GO:0044446,GO:0044464,GO:0072686,GO:0097159,GO:1901363
GSADVT00001916001	6mA	GO:0003674,GO:0003676,GO:0003677,GO:0005488,GO:0005575,GO:0005634,GO:0006139,GO:0006259,GO:0006281,GO:0006302,GO:0006310,GO:0006725,GO:0006807,GO:0006950,GO:0006974,GO:0008150,GO:0008152,GO:0009987,GO:0033554,GO:0034641,GO:0043170,GO:0043226,GO:0043227,GO:0043229,GO:0043231,GO:0044237,GO:0044238,GO:0044260,GO:0044424,GO:0044464,GO:0044699,GO:0044710,GO:0044763,GO:0046483,GO:0050896,GO:0051716,GO:…
GSADVT00017195001	6mA	GO:0003674,GO:0003676,GO:0003677,GO:0005488,GO:0005575,GO:0005634,GO:0006139,GO:0006351,GO:0006355,GO:0006725,GO:0006807,GO:0007275,GO:0008150,GO:0008152,GO:0009058,GO:0009059,GO:0009889,GO:0009987,GO:0010468,GO:0010556,GO:0016070,GO:0018130,GO:0019219,GO:0019222,GO:0019438,GO:0031323,GO:0031326,GO:0032501,GO:0032502,GO:0032774,GO:0034641,GO:0034645,GO:0034654,GO:0043170,GO:0043226,GO:0043227,GO:…
GSADVT00048222001	6mA	GO:0003674,GO:0003676,GO:0003677,GO:0005488,GO:0005575,GO:0005634,GO:0006139,GO:0006351,GO:0006355,GO:0006725,GO:0006807,GO:0008150,GO:0008152,GO:0008270,GO:0009058,GO:0009059,GO:0009889,GO:0009987,GO:0010468,GO:0010556,GO:0016070,GO:0018130,GO:0019219,GO:0019222,GO:0019438,GO:0031323,GO:0031326,GO:0032774,GO:0034641,GO:0034645,GO:0034654,GO:0043167,GO:0043169,GO:0043170,GO:0043226,GO:0043227,GO:…
GSADVT00028297001	6mA	GO:0003674,GO:0003676,GO:0003677,GO:0005488,GO:0005575,GO:0005634,GO:0006139,GO:0006351,GO:0006355,GO:0006725,GO:0006807,GO:0008150,GO:0008152,GO:0009058,GO:0009059,GO:0009889,GO:0009987,GO:0010468,GO:0010556,GO:0016070,GO:0018130,GO:0019219,GO:0019222,GO:0019438,GO:0031323,GO:0031326,GO:0032774,GO:0034641,GO:0034645,GO:0034654,GO:0043170,GO:0043226,GO:0043227,GO:0043229,GO:0043231,GO:0044237,GO:…
GSADVT00044011001	6mA	GO:0003674,GO:0003676,GO:0003677,GO:0005488,GO:0006355,GO:0008150,GO:0009889,GO:0010468,GO:0010556,GO:0019219,GO:0019222,GO:0031323,GO:0031326,GO:0050789,GO:0050794,GO:0051171,GO:0051252,GO:0060255,GO:0065007,GO:0080090,GO:0097159,GO:1901363,GO:1903506,GO:2000112,GO:2001141
GSADVT00010800001	6mA	GO:0003674,GO:0003676,GO:0003677,GO:0005488,GO:0097159,GO:1901363
GSADVT00033431001	6mA	GO:0003674,GO:0003676,GO:0003682,GO:0003723,GO:0005488,GO:0005575,GO:0005615,GO:0005634,GO:0005654,GO:0005856,GO:0006139,GO:0006351,GO:0006355,GO:0006725,GO:0006807,GO:0008150,GO:0008152,GO:0009058,GO:0009059,GO:0009889,GO:0009966,GO:0009968,GO:0009987,GO:0010468,GO:0010556,GO:0010646,GO:0010648,GO:0015629,GO:0016070,GO:0018130,GO:0019219,GO:0019222,GO:0019438,GO:0023051,GO:0023057,GO:0031323,GO:…
GSADVT00011430001	6mA	GO:0003674,GO:0003676,GO:0003723,GO:0003746,GO:0005488,GO:0005515,GO:0005575,GO:0005730,GO:0005737,GO:0005886,GO:0008135,GO:0016020,GO:0043226,GO:0043228,GO:0043229,GO:0043232,GO:0044422,GO:0044424,GO:0044428,GO:0044446,GO:0044464,GO:0097159,GO:1901363
GSADVT00013372001	6mA	GO:0003674,GO:0003676,GO:0003723,GO:0003779,GO:0005488,GO:0005515,GO:0005521,GO:0005575,GO:0005634,GO:0005635,GO:0005640,GO:0005654,GO:0005737,GO:0005794,GO:0005856,GO:0006996,GO:0006997,GO:0007010,GO:0007030,GO:0008092,GO:0008150,GO:0009987,GO:0016020,GO:0016021,GO:0016043,GO:0019867,GO:0030017,GO:0030154,GO:0031090,GO:0031224,GO:0031965,GO:0031967,GO:0031968,GO:0031975,GO:0032403,GO:0032502,GO:…
GSADVT00021086001	6mA	GO:0003674,GO:0003676,GO:0003723,GO:0003824,GO:0003950,GO:0005488,GO:0005575,GO:0005634,GO:0016740,GO:0016757,GO:0016763,GO:0043167,GO:0043169,GO:0043226,GO:0043227,GO:0043229,GO:0043231,GO:0044424,GO:0044464,GO:0044822,GO:0046872,GO:0097159,GO:1901363
GSADVT00013428001	6mA	GO:0003674,GO:0003676,GO:0003723,GO:0003824,GO:0004518,GO:0004519,GO:0004521,GO:0004540,GO:0005488,GO:0016787,GO:0016788,GO:0016892,GO:0016894,GO:0033897,GO:0097159,GO:1901363
GSADVT00028583001	6mA	GO:0003674,GO:0003676,GO:0003723,GO:0005047,GO:0005488,GO:0005575,GO:0005783,GO:0005786,GO:0005829,GO:0006605,GO:0006612,GO:0006613,GO:0006614,GO:0006810,GO:0006886,GO:0008104,GO:0008150,GO:0008312,GO:0009987,GO:0015031,GO:0016043,GO:0016482,GO:0030529,GO:0032991,GO:0033036,GO:0033365,GO:0034613,GO:0043021,GO:0043226,GO:0043227,GO:0043229,GO:0043231,GO:0044424,GO:0044444,GO:0044464,GO:0044699,GO:…
GSADVT00000590001	6mA	GO:0003674,GO:0003676,GO:0003723,GO:0005047,GO:0005488,GO:0005575,GO:0005785,GO:0005786,GO:0005829,GO:0006412,GO:0006417,GO:0006448,GO:0006605,GO:0006612,GO:0006613,GO:0006614,GO:0006810,GO:0006886,GO:0008104,GO:0008150,GO:0008152,GO:0008312,GO:0009058,GO:0009059,GO:0009889,GO:0009890,GO:0009892,GO:0009987,GO:0010467,GO:0010468,GO:0010556,GO:0010558,GO:0010605,GO:0010608,GO:0010629,GO:0015031,GO:…
GSADVT00041192001	6mA	GO:0003674,GO:0003676,GO:0003723,GO:0005488,GO:0005515,GO:0097159,GO:1901363
GSADVT00007666001	6mA	GO:0003674,GO:0003676,GO:0003723,GO:0005488,GO:0005575,GO:0005634,GO:0005654,GO:0043226,GO:0043227,GO:0043229,GO:0043231,GO:0044422,GO:0044424,GO:0044428,GO:0044446,GO:0044464,GO:0044822,GO:0097159,GO:1901363
GSADVT00011709001	6mA	GO:0003674,GO:0003676,GO:0003723,GO:0005488,GO:0005575,GO:0005634,GO:0005694,GO:0005730,GO:0005732,GO:0006139,GO:0006364,GO:0006725,GO:0006807,GO:0008150,GO:0008152,GO:0009892,GO:0009987,GO:0010563,GO:0010921,GO:0010923,GO:0016070,GO:0016072,GO:0019220,GO:0019222,GO:0030529,GO:0030684,GO:0031323,GO:0031324,GO:0032040,GO:0032991,GO:0034457,GO:0034470,GO:0034641,GO:0034660,GO:0035303,GO:0035305,GO:…
GSADVT00033728001	6mA	GO:0003674,GO:0003676,GO:0003723,GO:0005488,GO:0005575,GO:0005634,GO:0005737,GO:0006066,GO:0006629,GO:0006810,GO:0006869,GO:0008150,GO:0008152,GO:0008202,GO:0008203,GO:0016125,GO:0032991,GO:0032994,GO:0034358,GO:0034364,GO:0043226,GO:0043227,GO:0043229,GO:0043231,GO:0044238,GO:0044281,GO:0044421,GO:0044424,GO:0044464,GO:0044699,GO:0044710,GO:0044765,GO:0051179,GO:0051234,GO:0071702,GO:0071704,GO:…
GSADVT00015730001	6mA	GO:0003674,GO:0003676,GO:0003723,GO:0005488,GO:0005575,GO:0005634,GO:0005856,GO:0005912,GO:0005924,GO:0005925,GO:0006996,GO:0007010,GO:0007155,GO:0008150,GO:0008270,GO:0009987,GO:0015629,GO:0016043,GO:0016337,GO:0022610,GO:0030029,GO:0030036,GO:0030054,GO:0030055,GO:0031982,GO:0031988,GO:0034109,GO:0043167,GO:0043169,GO:0043226,GO:0043227,GO:0043228,GO:0043229,GO:0043230,GO:0043231,GO:0043232,GO:…
GSADVT00018452001	6mA	GO:0003674,GO:0003676,GO:0003723,GO:0005488,GO:0005575,GO:0005681,GO:0005737,GO:0005856,GO:0006139,GO:0006396,GO:0006397,GO:0006725,GO:0006807,GO:0006915,GO:0008150,GO:0008152,GO:0008219,GO:0008380,GO:0009987,GO:0012501,GO:0015030,GO:0016070,GO:0016071,GO:0016265,GO:0016604,GO:0016607,GO:0030529,GO:0032991,GO:0034641,GO:0043170,GO:0043226,GO:0043228,GO:0043229,GO:0043232,GO:0044237,GO:0044238,GO:…
GSADVT00000021001	6mA	GO:0003674,GO:0003676,GO:0003723,GO:0005488,GO:0005575,GO:0005681,GO:0006139,GO:0006396,GO:0006397,GO:0006725,GO:0006807,GO:0008150,GO:0008152,GO:0008380,GO:0009987,GO:0016070,GO:0016071,GO:0016604,GO:0016607,GO:0030529,GO:0032991,GO:0034641,GO:0043170,GO:0044237,GO:0044238,GO:0044260,GO:0044422,GO:0044424,GO:0044428,GO:0044446,GO:0044451,GO:0044464,GO:0046483,GO:0071704,GO:0090304,GO:0097159,GO:…
GSADVT00017121001	6mA	GO:0003674,GO:0003676,GO:0003723,GO:0005488,GO:0005575,GO:0005681,GO:0006139,GO:0006396,GO:0006397,GO:0006725,GO:0006807,GO:0008150,GO:0008152,GO:0008380,GO:0009987,GO:0016070,GO:0016071,GO:0030529,GO:0032991,GO:0034641,GO:0043170,GO:0044237,GO:0044238,GO:0044260,GO:0044422,GO:0044424,GO:0044428,GO:0044446,GO:0044464,GO:0046483,GO:0071704,GO:0090304,GO:0097159,GO:1901360,GO:1901363
GSADVT00004892001	6mA	GO:0003674,GO:0003676,GO:0003723,GO:0005488,GO:0097159,GO:1901363
GSADVT00014907001	6mA	GO:0003674,GO:0003676,GO:0005488,GO:0097159,GO:1901363
GSADVT00063036001	6mA	GO:0003674,GO:0003676,GO:0005488,GO:0097159,GO:1901363
GSADVT00030254001	6mA	GO:0003674,GO:0003682,GO:0005488,GO:0005515,GO:0005575,GO:0005634,GO:0006139,GO:0006325,GO:0006351,GO:0006355,GO:0006357,GO:0006725,GO:0006807,GO:0008150,GO:0008152,GO:0009058,GO:0009059,GO:0009889,GO:0009987,GO:0010468,GO:0010556,GO:0016043,GO:0016070,GO:0016568,GO:0018130,GO:0019219,GO:0019222,GO:0019438,GO:0031323,GO:0031326,GO:0032774,GO:0034641,GO:0034645,GO:0034654,GO:0042393,GO:0043170,GO:…
GSADVT00038965001	6mA	GO:0003674,GO:0003735,GO:0005198,GO:0005488,GO:0005515,GO:0005575,GO:0005634,GO:0005840,GO:0006412,GO:0008150,GO:0008152,GO:0009058,GO:0009059,GO:0009987,GO:0019538,GO:0030529,GO:0032991,GO:0034645,GO:0043170,GO:0043226,GO:0043227,GO:0043228,GO:0043229,GO:0043231,GO:0043232,GO:0044237,GO:0044238,GO:0044249,GO:0044260,GO:0044267,GO:0044424,GO:0044444,GO:0044464,GO:0071704,GO:1901576
GSADVT00005468001	6mA	GO:0003674,GO:0003735,GO:0005198,GO:0005575,GO:0005840,GO:0006412,GO:0008150,GO:0008152,GO:0009058,GO:0009059,GO:0009987,GO:0019538,GO:0030529,GO:0032991,GO:0034645,GO:0043170,GO:0043226,GO:0043228,GO:0043229,GO:0043232,GO:0044237,GO:0044238,GO:0044249,GO:0044260,GO:0044267,GO:0044424,GO:0044444,GO:0044464,GO:0071704,GO:1901576
GSADVT00040596001	6mA	GO:0003674,GO:0003824,GO:0003841,GO:0005575,GO:0005635,GO:0005783,GO:0005789,GO:0005886,GO:0006629,GO:0006644,GO:0006650,GO:0006793,GO:0006796,GO:0008150,GO:0008152,GO:0008374,GO:0008610,GO:0008654,GO:0009058,GO:0009987,GO:0016020,GO:0016021,GO:0016024,GO:0016411,GO:0016740,GO:0016746,GO:0016747,GO:0019637,GO:0031090,GO:0031224,GO:0031967,GO:0031975,GO:0042171,GO:0043226,GO:0043227,GO:0043229,GO:…
GSADVT00001458001	6mA	GO:0003674,GO:0003824,GO:0003846,GO:0004144,GO:0005575,GO:0005789,GO:0006629,GO:0006637,GO:0006638,GO:0006639,GO:0006641,GO:0006732,GO:0006790,GO:0006793,GO:0008150,GO:0008152,GO:0008374,GO:0008610,GO:0009058,GO:0009987,GO:0016020,GO:0016021,GO:0016043,GO:0016411,GO:0016740,GO:0016746,GO:0016747,GO:0019432,GO:0019915,GO:0022607,GO:0031090,GO:0031224,GO:0032501,GO:0034377,GO:0034379,GO:0035336,GO:…
GSADVT00050247001	6mA	GO:0003674,GO:0003824,GO:0003956,GO:0005975,GO:0006464,GO:0006471,GO:0006486,GO:0008150,GO:0008152,GO:0009987,GO:0016740,GO:0016757,GO:0016763,GO:0019538,GO:0036211,GO:0043170,GO:0043412,GO:0043413,GO:0044237,GO:0044238,GO:0044260,GO:0044267,GO:0044699,GO:0044710,GO:0044723,GO:0044763,GO:0070085,GO:0071704
GSADVT00017717001	6mA	GO:0003674,GO:0003824,GO:0003993,GO:0005488,GO:0005575,GO:0005576,GO:0016787,GO:0016788,GO:0016791,GO:0042578,GO:0043167,GO:0043169,GO:0046872
GSADVT00026330001	6mA	GO:0003674,GO:0003824,GO:0004045,GO:0005575,GO:0005739,GO:0005829,GO:0008150,GO:0009892,GO:0010468,GO:0010605,GO:0010629,GO:0010941,GO:0010942,GO:0016020,GO:0016787,GO:0016788,GO:0019222,GO:0042981,GO:0043065,GO:0043066,GO:0043067,GO:0043068,GO:0043069,GO:0043226,GO:0043227,GO:0043229,GO:0043231,GO:0044424,GO:0044444,GO:0044464,GO:0048518,GO:0048519,GO:0048522,GO:0048523,GO:0050789,GO:0050794,GO:…
GSADVT00008976001	6mA	GO:0003674,GO:0003824,GO:0004047,GO:0005488,GO:0005515,GO:0005575,GO:0005739,GO:0005960,GO:0006082,GO:0006520,GO:0006544,GO:0006546,GO:0006807,GO:0008150,GO:0008152,GO:0008168,GO:0009056,GO:0009063,GO:0009069,GO:0009071,GO:0009987,GO:0016054,GO:0016740,GO:0016741,GO:0019464,GO:0019752,GO:0019899,GO:0032259,GO:0032991,GO:0043226,GO:0043227,GO:0043229,GO:0043231,GO:0043234,GO:0043436,GO:0044237,GO:…
GSADVT00019556001	6mA	GO:0003674,GO:0003824,GO:0004064,GO:0004089,GO:0005488,GO:0005575,GO:0005737,GO:0006730,GO:0008150,GO:0008152,GO:0008270,GO:0009987,GO:0016787,GO:0016788,GO:0016829,GO:0016835,GO:0016836,GO:0031982,GO:0031988,GO:0043167,GO:0043169,GO:0043226,GO:0043227,GO:0043230,GO:0044237,GO:0044281,GO:0044421,GO:0044424,GO:0044464,GO:0044699,GO:0044710,GO:0044763,GO:0046872,GO:0046914,GO:0052689,GO:0065010,GO:…
GSADVT00010280001	6mA	GO:0003674,GO:0003824,GO:0004105,GO:0005575,GO:0005783,GO:0008150,GO:0008152,GO:0009058,GO:0016740,GO:0016772,GO:0016779,GO:0043226,GO:0043227,GO:0043229,GO:0043231,GO:0044424,GO:0044444,GO:0044464,GO:0070567
GSADVT00001949001	6mA	GO:0003674,GO:0003824,GO:0004112,GO:0004114,GO:0005488,GO:0005515,GO:0005575,GO:0005886,GO:0006139,GO:0006163,GO:0006725,GO:0006753,GO:0006793,GO:0006796,GO:0006807,GO:0007165,GO:0008081,GO:0008150,GO:0008152,GO:0009117,GO:0009150,GO:0009187,GO:0009259,GO:0009987,GO:0016020,GO:0016787,GO:0016788,GO:0019637,GO:0019693,GO:0034641,GO:0042578,GO:0043167,GO:0043169,GO:0044237,GO:0044238,GO:0044281,GO:…
GSADVT00033630001	6mA	GO:0003674,GO:0003824,GO:0004157,GO:0005488,GO:0005575,GO:0005737,GO:0006139,GO:0006206,GO:0006208,GO:0006725,GO:0006807,GO:0008150,GO:0008152,GO:0008270,GO:0009056,GO:0009112,GO:0009987,GO:0016787,GO:0016810,GO:0016812,GO:0034641,GO:0043167,GO:0043169,GO:0044237,GO:0044238,GO:0044248,GO:0044270,GO:0044281,GO:0044424,GO:0044464,GO:0044699,GO:0044710,GO:0044712,GO:0044763,GO:0046113,GO:0046483,GO:…
GSADVT00007211001	6mA	GO:0003674,GO:0003824,GO:0004161,GO:0004311,GO:0004337,GO:0004659,GO:0005488,GO:0005575,GO:0005829,GO:0006066,GO:0006629,GO:0006644,GO:0006694,GO:0006695,GO:0006720,GO:0006721,GO:0006793,GO:0006796,GO:0008150,GO:0008152,GO:0008202,GO:0008203,GO:0008299,GO:0008610,GO:0008654,GO:0009058,GO:0009987,GO:0016114,GO:0016125,GO:0016126,GO:0016740,GO:0016765,GO:0019637,GO:0033383,GO:0033384,GO:0033385,GO:…
GSADVT00026708001	6mA	GO:0003674,GO:0003824,GO:0004168,GO:0005575,GO:0006629,GO:0006644,GO:0006793,GO:0006796,GO:0008150,GO:0008152,GO:0008610,GO:0008654,GO:0009058,GO:0009987,GO:0016021,GO:0016301,GO:0016740,GO:0016772,GO:0016773,GO:0019637,GO:0030176,GO:0031224,GO:0031227,GO:0031300,GO:0031301,GO:0043048,GO:0044237,GO:0044238,GO:0044249,GO:0044255,GO:0044422,GO:0044424,GO:0044425,GO:0044432,GO:0044444,GO:0044446,GO:…
GSADVT00018610001	6mA	GO:0003674,GO:0003824,GO:0004175,GO:0004197,GO:0004198,GO:0005488,GO:0005509,GO:0005575,GO:0005622,GO:0005737,GO:0006508,GO:0007586,GO:0008150,GO:0008152,GO:0008233,GO:0008234,GO:0016787,GO:0019538,GO:0032501,GO:0043167,GO:0043169,GO:0043170,GO:0044238,GO:0044424,GO:0044464,GO:0044699,GO:0044707,GO:0046872,GO:0070011,GO:0071704
GSADVT00030679001	6mA	GO:0003674,GO:0003824,GO:0004175,GO:0004222,GO:0005215,GO:0005488,GO:0005515,GO:0005575,GO:0005739,GO:0005743,GO:0005746,GO:0005750,GO:0006091,GO:0006119,GO:0006122,GO:0006139,GO:0006163,GO:0006725,GO:0006753,GO:0006793,GO:0006796,GO:0006807,GO:0006810,GO:0006811,GO:0006812,GO:0006818,GO:0008121,GO:0008150,GO:0008152,GO:0008233,GO:0008237,GO:0008270,GO:0008324,GO:0009060,GO:0009116,GO:0009117,GO:…
GSADVT00039634001	6mA	GO:0003674,GO:0003824,GO:0004175,GO:0004222,GO:0005488,GO:0005575,GO:0005576,GO:0006508,GO:0008150,GO:0008152,GO:0008233,GO:0008237,GO:0008270,GO:0016787,GO:0019538,GO:0043167,GO:0043169,GO:0043170,GO:0044238,GO:0046872,GO:0046914,GO:0070011,GO:0071704
GSADVT00018132001	6mA	GO:0003674,GO:0003824,GO:0004175,GO:0004252,GO:0005575,GO:0005789,GO:0006508,GO:0006810,GO:0008104,GO:0008150,GO:0008152,GO:0008233,GO:0008236,GO:0009966,GO:0010646,GO:0015031,GO:0016020,GO:0016021,GO:0016787,GO:0017171,GO:0019538,GO:0023051,GO:0031090,GO:0031224,GO:0032879,GO:0032880,GO:0033036,GO:0042058,GO:0043170,GO:0044238,GO:0044422,GO:0044424,GO:0044425,GO:0044432,GO:0044444,GO:0044446,GO:…
GSADVT00005672001	6mA	GO:0003674,GO:0003824,GO:0004175,GO:0005575,GO:0005793,GO:0006508,GO:0006810,GO:0008150,GO:0008152,GO:0008233,GO:0016192,GO:0016787,GO:0019538,GO:0043170,GO:0043226,GO:0043227,GO:0043229,GO:0043231,GO:0044238,GO:0044424,GO:0044444,GO:0044464,GO:0051179,GO:0051234,GO:0070011,GO:0071704
GSADVT00043925001	6mA	GO:0003674,GO:0003824,GO:0004177,GO:0005488,GO:0005515,GO:0005575,GO:0005737,GO:0006508,GO:0006518,GO:0006807,GO:0008150,GO:0008152,GO:0008233,GO:0008235,GO:0008237,GO:0008238,GO:0009056,GO:0009987,GO:0010815,GO:0016787,GO:0019538,GO:0030145,GO:0031982,GO:0031988,GO:0034641,GO:0042802,GO:0042803,GO:0043167,GO:0043169,GO:0043170,GO:0043171,GO:0043226,GO:0043227,GO:0043230,GO:0043603,GO:0044237,GO:…
GSADVT00051160001	6mA	GO:0003674,GO:0003824,GO:0004177,GO:0005575,GO:0008233,GO:0008238,GO:0016787,GO:0042597,GO:0044464,GO:0070011
GSADVT00044600001	6mA	GO:0003674,GO:0003824,GO:0004180,GO:0004181,GO:0005488,GO:0005575,GO:0005886,GO:0006508,GO:0008150,GO:0008152,GO:0008233,GO:0008235,GO:0008237,GO:0008238,GO:0008270,GO:0016020,GO:0016787,GO:0016788,GO:0019538,GO:0031224,GO:0031225,GO:0043167,GO:0043169,GO:0043170,GO:0044238,GO:0044425,GO:0044464,GO:0046872,GO:0046914,GO:0070011,GO:0071704
GSADVT00010541001	6mA	GO:0003674,GO:0003824,GO:0004300,GO:0005575,GO:0005739,GO:0005759,GO:0006082,GO:0006629,GO:0006631,GO:0006635,GO:0008150,GO:0008152,GO:0009056,GO:0009062,GO:0009987,GO:0016042,GO:0016054,GO:0016829,GO:0016835,GO:0016836,GO:0019395,GO:0019752,GO:0030258,GO:0031974,GO:0031982,GO:0031988,GO:0032787,GO:0034440,GO:0043226,GO:0043227,GO:0043229,GO:0043230,GO:0043231,GO:0043233,GO:0043436,GO:0044237,GO:…
GSADVT00040618001	6mA	GO:0003674,GO:0003824,GO:0004301,GO:0005575,GO:0006629,GO:0008150,GO:0008152,GO:0009987,GO:0016021,GO:0016787,GO:0016801,GO:0016803,GO:0031224,GO:0044237,GO:0044238,GO:0044255,GO:0044425,GO:0044699,GO:0044710,GO:0044763,GO:0071704
GSADVT00015709001	6mA	GO:0003674,GO:0003824,GO:0004334,GO:0005488,GO:0005575,GO:0006082,GO:0006520,GO:0006525,GO:0006527,GO:0006558,GO:0006559,GO:0006570,GO:0006572,GO:0006725,GO:0006807,GO:0008150,GO:0008152,GO:0009056,GO:0009063,GO:0009064,GO:0009065,GO:0009072,GO:0009074,GO:0009987,GO:0016054,GO:0016787,GO:0016822,GO:0016823,GO:0019439,GO:0019752,GO:0031982,GO:0031988,GO:0043167,GO:0043169,GO:0043226,GO:0043227,GO:…
GSADVT00014949001	6mA	GO:0003674,GO:0003824,GO:0004360,GO:0005488,GO:0005975,GO:0006002,GO:0006040,GO:0006047,GO:0006048,GO:0006082,GO:0006139,GO:0006464,GO:0006486,GO:0006487,GO:0006520,GO:0006541,GO:0006725,GO:0006753,GO:0006793,GO:0006796,GO:0006807,GO:0008150,GO:0008152,GO:0008483,GO:0009058,GO:0009064,GO:0009117,GO:0009165,GO:0009225,GO:0009226,GO:0009987,GO:0016740,GO:0016769,GO:0018130,GO:0019438,GO:0019538,GO:…
GSADVT00035379001	6mA	GO:0003674,GO:0003824,GO:0004395,GO:0005575,GO:0005743,GO:0005975,GO:0006732,GO:0006733,GO:0006743,GO:0006744,GO:0008150,GO:0008152,GO:0008168,GO:0008169,GO:0008171,GO:0008425,GO:0008689,GO:0008757,GO:0009058,GO:0009108,GO:0009311,GO:0009312,GO:0009877,GO:0009987,GO:0010420,GO:0016020,GO:0016051,GO:0016740,GO:0016741,GO:0019866,GO:0030580,GO:0031090,GO:0031966,GO:0032259,GO:0042180,GO:0042181,GO:…
GSADVT00027404001	6mA	GO:0003674,GO:0003824,GO:0004415,GO:0004553,GO:0004563,GO:0005575,GO:0005634,GO:0005829,GO:0006040,GO:0006044,GO:0006464,GO:0006516,GO:0006517,GO:0008150,GO:0008152,GO:0009056,GO:0009057,GO:0009100,GO:0009987,GO:0015929,GO:0016020,GO:0016231,GO:0016787,GO:0016798,GO:0019538,GO:0030163,GO:0036211,GO:0043170,GO:0043226,GO:0043227,GO:0043229,GO:0043231,GO:0043412,GO:0044237,GO:0044238,GO:0044248,GO:…
GSADVT00034428001	6mA	GO:0003674,GO:0003824,GO:0004435,GO:0004620,GO:0004629,GO:0004871,GO:0005488,GO:0005509,GO:0005515,GO:0005575,GO:0005634,GO:0005783,GO:0006629,GO:0006644,GO:0006650,GO:0006793,GO:0006796,GO:0006810,GO:0006887,GO:0007165,GO:0007340,GO:0008081,GO:0008150,GO:0008152,GO:0009056,GO:0009987,GO:0016020,GO:0016042,GO:0016192,GO:0016298,GO:0016787,GO:0016788,GO:0017156,GO:0019637,GO:0032940,GO:0035556,GO:…
GSADVT00014695001	6mA	GO:0003674,GO:0003824,GO:0004497,GO:0004504,GO:0005488,GO:0005507,GO:0005575,GO:0005576,GO:0006518,GO:0006807,GO:0008150,GO:0008152,GO:0009987,GO:0016020,GO:0016491,GO:0016705,GO:0016715,GO:0034641,GO:0043167,GO:0043169,GO:0043603,GO:0044237,GO:0044699,GO:0044710,GO:0046872,GO:0046914,GO:0055114,GO:0071704,GO:1901564
GSADVT00019846001	6mA	GO:0003674,GO:0003824,GO:0004497,GO:0005488,GO:0005507,GO:0005575,GO:0008150,GO:0008152,GO:0016021,GO:0016491,GO:0016705,GO:0016715,GO:0031224,GO:0043167,GO:0043169,GO:0044425,GO:0044699,GO:0044710,GO:0046872,GO:0046914,GO:0055114
GSADVT00019781001	6mA	GO:0003674,GO:0003824,GO:0004518,GO:0004519,GO:0005488,GO:0016787,GO:0016788,GO:0043167,GO:0043169,GO:0046872
GSADVT00004127001	6mA	GO:0003674,GO:0003824,GO:0004551,GO:0005488,GO:0005575,GO:0005576,GO:0005887,GO:0006139,GO:0006725,GO:0006753,GO:0006793,GO:0006796,GO:0006807,GO:0007154,GO:0008150,GO:0008152,GO:0009056,GO:0009117,GO:0009166,GO:0009987,GO:0016021,GO:0016462,GO:0016787,GO:0016817,GO:0016818,GO:0019439,GO:0019637,GO:0031224,GO:0031226,GO:0034641,GO:0034655,GO:0043167,GO:0043169,GO:0044237,GO:0044238,GO:0044248,GO:…
GSADVT00008189001	6mA	GO:0003674,GO:0003824,GO:0004553,GO:0004555,GO:0005975,GO:0005984,GO:0005991,GO:0008150,GO:0008152,GO:0009311,GO:0009987,GO:0015927,GO:0016787,GO:0016798,GO:0044237,GO:0044238,GO:0044262,GO:0044699,GO:0044710,GO:0044723,GO:0044763,GO:0071704
GSADVT00008727001	6mA	GO:0003674,GO:0003824,GO:0004553,GO:0004556,GO:0005488,GO:0005509,GO:0005575,GO:0005615,GO:0005975,GO:0008150,GO:0008152,GO:0009056,GO:0016052,GO:0016160,GO:0016787,GO:0016798,GO:0031404,GO:0031982,GO:0031988,GO:0043167,GO:0043168,GO:0043169,GO:0043226,GO:0043227,GO:0043230,GO:0044238,GO:0044421,GO:0046872,GO:0065010,GO:0070062,GO:0071704,GO:1901575,GO:1903561
GSADVT00051125001	6mA	GO:0003674,GO:0003824,GO:0004553,GO:0004557,GO:0005975,GO:0008150,GO:0008152,GO:0015925,GO:0016787,GO:0016798,GO:0044238,GO:0052692,GO:0071704
GSADVT00008262001	6mA	GO:0003674,GO:0003824,GO:0004553,GO:0004557,GO:0015925,GO:0016787,GO:0016798,GO:0052692
GSADVT00003652001	6mA	GO:0003674,GO:0003824,GO:0004553,GO:0004558,GO:0005488,GO:0005575,GO:0005765,GO:0005774,GO:0005975,GO:0008150,GO:0008152,GO:0015926,GO:0016020,GO:0016787,GO:0016798,GO:0030246,GO:0031090,GO:0032450,GO:0044238,GO:0044422,GO:0044424,GO:0044437,GO:0044444,GO:0044446,GO:0044464,GO:0071704,GO:0090599,GO:0098588
GSADVT00012374001	6mA	GO:0003674,GO:0003824,GO:0004553,GO:0004559,GO:0004571,GO:0005488,GO:0005509,GO:0005575,GO:0005783,GO:0005789,GO:0005975,GO:0006491,GO:0006508,GO:0006511,GO:0006516,GO:0006950,GO:0006984,GO:0007165,GO:0008150,GO:0008152,GO:0009056,GO:0009057,GO:0009100,GO:0009311,GO:0009987,GO:0010498,GO:0015923,GO:0015924,GO:0016020,GO:0016021,GO:0016787,GO:0016798,GO:0019538,GO:0019941,GO:0030163,GO:0030433,GO:…
GSADVT00021375001	6mA	GO:0003674,GO:0003824,GO:0004553,GO:0004560,GO:0005575,GO:0005576,GO:0005773,GO:0005975,GO:0006516,GO:0008150,GO:0008152,GO:0009056,GO:0009057,GO:0009100,GO:0009987,GO:0015928,GO:0016787,GO:0016798,GO:0019538,GO:0030163,GO:0043170,GO:0043226,GO:0043227,GO:0043229,GO:0043231,GO:0044237,GO:0044238,GO:0044248,GO:0044260,GO:0044265,GO:0044424,GO:0044444,GO:0044464,GO:0048046,GO:0071704,GO:1901135,GO:…
GSADVT00019437001	6mA	GO:0003674,GO:0003824,GO:0004553,GO:0004563,GO:0005575,GO:0005634,GO:0005737,GO:0005975,GO:0008150,GO:0008152,GO:0015929,GO:0016787,GO:0016798,GO:0043226,GO:0043227,GO:0043229,GO:0043231,GO:0044238,GO:0044424,GO:0044464,GO:0071704
GSADVT00020736001	6mA	GO:0003674,GO:0003824,GO:0004553,GO:0004649,GO:0005575,GO:0005634,GO:0005654,GO:0005975,GO:0006342,GO:0006355,GO:0006521,GO:0006810,GO:0006897,GO:0006909,GO:0006950,GO:0006996,GO:0006997,GO:0008150,GO:0008152,GO:0009266,GO:0009408,GO:0009628,GO:0009889,GO:0009890,GO:0009892,GO:0009987,GO:0010468,GO:0010556,GO:0010558,GO:0010565,GO:0010605,GO:0010629,GO:0016043,GO:0016192,GO:0016458,GO:0016787,GO:…
GSADVT00064800001	6mA	GO:0003674,GO:0003824,GO:0004553,GO:0005975,GO:0008150,GO:0008152,GO:0016787,GO:0016798,GO:0042972,GO:0044238,GO:0071704
GSADVT00035014001	6mA	GO:0003674,GO:0003824,GO:0004615,GO:0005575,GO:0005737,GO:0005829,GO:0005975,GO:0006139,GO:0006464,GO:0006486,GO:0006487,GO:0006488,GO:0006725,GO:0006753,GO:0006793,GO:0006796,GO:0006807,GO:0008150,GO:0008152,GO:0009058,GO:0009117,GO:0009165,GO:0009225,GO:0009226,GO:0009298,GO:0009987,GO:0016853,GO:0016866,GO:0016868,GO:0018130,GO:0018193,GO:0018196,GO:0018279,GO:0019438,GO:0019538,GO:0019637,GO:…
GSADVT00005512001	6mA	GO:0003674,GO:0003824,GO:0004620,GO:0004767,GO:0005488,GO:0005575,GO:0006629,GO:0006643,GO:0006665,GO:0006807,GO:0008081,GO:0008150,GO:0008152,GO:0009987,GO:0016021,GO:0016298,GO:0016787,GO:0016788,GO:0031224,GO:0042578,GO:0043167,GO:0043169,GO:0044237,GO:0044238,GO:0044255,GO:0044425,GO:0044699,GO:0044710,GO:0044763,GO:0046872,GO:0071704,GO:1901564
GSADVT00041078001	6mA	GO:0003674,GO:0003824,GO:0004620,GO:0004767,GO:0005575,GO:0005615,GO:0006066,GO:0006576,GO:0006629,GO:0006643,GO:0006644,GO:0006665,GO:0006684,GO:0006685,GO:0006793,GO:0006796,GO:0006807,GO:0008081,GO:0008150,GO:0008152,GO:0009056,GO:0009308,GO:0009395,GO:0009987,GO:0016042,GO:0016298,GO:0016787,GO:0016788,GO:0016798,GO:0019637,GO:0030149,GO:0031982,GO:0031988,GO:0034641,GO:0042439,GO:0042578,GO:…
GSADVT00005307001	6mA	GO:0003674,GO:0003824,GO:0004656,GO:0005488,GO:0005506,GO:0005575,GO:0005768,GO:0005789,GO:0005794,GO:0005802,GO:0008150,GO:0008152,GO:0016020,GO:0016021,GO:0016491,GO:0016705,GO:0016706,GO:0019798,GO:0019842,GO:0030246,GO:0031090,GO:0031224,GO:0031406,GO:0031418,GO:0031543,GO:0031545,GO:0036094,GO:0043167,GO:0043168,GO:0043169,GO:0043177,GO:0043226,GO:0043227,GO:0043229,GO:0043231,GO:0044422,GO:…
GSADVT00019539001	6mA	GO:0003674,GO:0003824,GO:0004721,GO:0005488,GO:0005509,GO:0005575,GO:0005829,GO:0005886,GO:0006464,GO:0006470,GO:0006793,GO:0006796,GO:0008150,GO:0008152,GO:0009987,GO:0016020,GO:0016311,GO:0016787,GO:0016788,GO:0016791,GO:0019538,GO:0036211,GO:0042383,GO:0042578,GO:0043167,GO:0043169,GO:0043170,GO:0043412,GO:0044237,GO:0044238,GO:0044260,GO:0044267,GO:0044424,GO:0044444,GO:0044464,GO:0046872,GO:…
GSADVT00037738001	6mA	GO:0003674,GO:0003824,GO:0004738,GO:0004739,GO:0005575,GO:0005739,GO:0005759,GO:0005975,GO:0006082,GO:0006090,GO:0006091,GO:0006096,GO:0008150,GO:0008152,GO:0009056,GO:0009987,GO:0016052,GO:0016491,GO:0016624,GO:0016903,GO:0019752,GO:0031974,GO:0032787,GO:0043226,GO:0043227,GO:0043229,GO:0043231,GO:0043233,GO:0043436,GO:0044237,GO:0044238,GO:0044281,GO:0044422,GO:0044424,GO:0044429,GO:0044444,GO:…
GSADVT00031118001	6mA	GO:0003674,GO:0003824,GO:0004768,GO:0005488,GO:0005515,GO:0005575,GO:0005737,GO:0005739,GO:0005789,GO:0006082,GO:0006629,GO:0006631,GO:0008150,GO:0008152,GO:0009987,GO:0010035,GO:0010038,GO:0016020,GO:0016021,GO:0016215,GO:0016491,GO:0016705,GO:0016717,GO:0019752,GO:0019899,GO:0020037,GO:0031090,GO:0031224,GO:0031982,GO:0031988,GO:0032787,GO:0042221,GO:0043167,GO:0043169,GO:0043226,GO:0043227,GO:…
GSADVT00015862001	6mA	GO:0003674,GO:0003824,GO:0004784,GO:0005488,GO:0006801,GO:0008150,GO:0008152,GO:0009987,GO:0016209,GO:0016491,GO:0016721,GO:0043167,GO:0043169,GO:0044237,GO:0044699,GO:0044710,GO:0046872,GO:0055114,GO:0072593
GSADVT00033030001	6mA	GO:0003674,GO:0003824,GO:0004800,GO:0005575,GO:0005789,GO:0008150,GO:0008152,GO:0009058,GO:0010817,GO:0016020,GO:0016021,GO:0016491,GO:0031090,GO:0031224,GO:0042445,GO:0042446,GO:0044422,GO:0044424,GO:0044425,GO:0044432,GO:0044444,GO:0044446,GO:0044464,GO:0065007,GO:0065008,GO:0098588,GO:0098589
GSADVT00014518001	6mA	GO:0003674,GO:0003824,GO:0004806,GO:0005488,GO:0005575,GO:0005576,GO:0006629,GO:0008150,GO:0008152,GO:0009056,GO:0016042,GO:0016298,GO:0016787,GO:0016788,GO:0043167,GO:0043169,GO:0044238,GO:0044699,GO:0044710,GO:0044712,GO:0046872,GO:0052689,GO:0071704,GO:1901575
GSADVT00022683001	6mA	GO:0003674,GO:0003824,GO:0004857,GO:0004866,GO:0004869,GO:0005488,GO:0005575,GO:0005737,GO:0006464,GO:0007275,GO:0008150,GO:0008152,GO:0008270,GO:0009892,GO:0009987,GO:0010466,GO:0010605,GO:0010941,GO:0010951,GO:0010955,GO:0016567,GO:0016874,GO:0019222,GO:0019538,GO:0030162,GO:0030234,GO:0030414,GO:0031323,GO:0031324,GO:0032268,GO:0032269,GO:0032446,GO:0032501,GO:0032502,GO:0036211,GO:0042981,GO:…
GSADVT00003667001	6mA	GO:0003674,GO:0003824,GO:0004871,GO:0006629,GO:0008081,GO:0008150,GO:0008152,GO:0009056,GO:0016042,GO:0016787,GO:0016788,GO:0042578,GO:0044238,GO:0044699,GO:0044710,GO:0044712,GO:0060089,GO:0071704,GO:1901575
GSADVT00011387001	6mA	GO:0003674,GO:0003824,GO:0005215,GO:0005319,GO:0005488,GO:0005496,GO:0005575,GO:0005739,GO:0005777,GO:0006629,GO:0006694,GO:0006810,GO:0006811,GO:0006820,GO:0006869,GO:0008150,GO:0008152,GO:0008202,GO:0008289,GO:0008610,GO:0009058,GO:0015248,GO:0015711,GO:0015748,GO:0015850,GO:0015914,GO:0015918,GO:0016408,GO:0016740,GO:0016746,GO:0016747,GO:0022892,GO:0030301,GO:0032934,GO:0033814,GO:0036094,GO:…
GSADVT00010293001	6mA	GO:0003674,GO:0003824,GO:0005488,GO:0005515,GO:0005575,GO:0005634,GO:0005739,GO:0006139,GO:0006259,GO:0006281,GO:0006284,GO:0006725,GO:0006807,GO:0006950,GO:0006974,GO:0006979,GO:0008150,GO:0008152,GO:0009987,GO:0016787,GO:0016798,GO:0016799,GO:0019104,GO:0032403,GO:0032404,GO:0032407,GO:0033554,GO:0034641,GO:0043167,GO:0043169,GO:0043170,GO:0043226,GO:0043227,GO:0043229,GO:0043231,GO:0044237,GO:…
GSADVT00044987001	6mA	GO:0003674,GO:0003824,GO:0005488,GO:0005515,GO:0005575,GO:0005737,GO:0005874,GO:0031982,GO:0031988,GO:0032991,GO:0043226,GO:0043227,GO:0043230,GO:0043234,GO:0044421,GO:0044422,GO:0044424,GO:0044430,GO:0044446,GO:0044464,GO:0065010,GO:0070062,GO:1903561
GSADVT00062064001	6mA	GO:0003674,GO:0003824,GO:0005488,GO:0005515,GO:0008233,GO:0008237,GO:0016787,GO:0043167,GO:0043169,GO:0046872,GO:0070011
GSADVT00017357001	6mA	GO:0003674,GO:0003824,GO:0005488,GO:0005575,GO:0005737,GO:0006139,GO:0006399,GO:0006400,GO:0006725,GO:0006807,GO:0008033,GO:0008150,GO:0008152,GO:0008479,GO:0008616,GO:0009058,GO:0009116,GO:0009119,GO:0009163,GO:0009451,GO:0009987,GO:0016070,GO:0016740,GO:0016757,GO:0016763,GO:0018130,GO:0019438,GO:0034470,GO:0034641,GO:0034654,GO:0034660,GO:0042455,GO:0043167,GO:0043169,GO:0043170,GO:0043412,GO:…
GSADVT00046778001	6mA	GO:0003674,GO:0003824,GO:0005488,GO:0005575,GO:0005758,GO:0006082,GO:0006790,GO:0006807,GO:0008150,GO:0008152,GO:0008482,GO:0009987,GO:0016491,GO:0016667,GO:0016670,GO:0020037,GO:0030151,GO:0031970,GO:0031974,GO:0042126,GO:0042128,GO:0043167,GO:0043169,GO:0043436,GO:0044237,GO:0044281,GO:0044422,GO:0044424,GO:0044429,GO:0044444,GO:0044446,GO:0044464,GO:0044699,GO:0044710,GO:0044763,GO:0046872,GO:…
GSADVT00010619001	6mA	GO:0003674,GO:0003824,GO:0005488,GO:0005575,GO:0005975,GO:0006464,GO:0006486,GO:0008150,GO:0008152,GO:0009987,GO:0016021,GO:0016740,GO:0016757,GO:0019538,GO:0031224,GO:0036211,GO:0043167,GO:0043169,GO:0043170,GO:0043412,GO:0043413,GO:0044237,GO:0044238,GO:0044260,GO:0044267,GO:0044425,GO:0044699,GO:0044710,GO:0044723,GO:0044763,GO:0046872,GO:0070085,GO:0071704
GSADVT00035281001	6mA	GO:0003674,GO:0003824,GO:0005488,GO:0005575,GO:0007389,GO:0008150,GO:0008194,GO:0008375,GO:0016020,GO:0016021,GO:0016740,GO:0016757,GO:0016758,GO:0030173,GO:0031224,GO:0031228,GO:0031300,GO:0031301,GO:0032501,GO:0032502,GO:0033829,GO:0043167,GO:0043169,GO:0044422,GO:0044424,GO:0044425,GO:0044431,GO:0044444,GO:0044446,GO:0044464,GO:0044699,GO:0044707,GO:0044767,GO:0046872
GSADVT00017104001	6mA	GO:0003674,GO:0003824,GO:0005488,GO:0005975,GO:0008150,GO:0008152,GO:0016853,GO:0016854,GO:0016857,GO:0030246,GO:0044238,GO:0047938,GO:0071704
GSADVT00001002001	6mA	GO:0003674,GO:0003824,GO:0005488,GO:0006464,GO:0008150,GO:0008152,GO:0008270,GO:0009987,GO:0016567,GO:0016874,GO:0019538,GO:0032446,GO:0036211,GO:0043167,GO:0043169,GO:0043170,GO:0043412,GO:0044237,GO:0044238,GO:0044260,GO:0044267,GO:0046872,GO:0046914,GO:0070647,GO:0071704
GSADVT00011471001	6mA	GO:0003674,GO:0003824,GO:0005488,GO:0006518,GO:0006807,GO:0008150,GO:0008152,GO:0009058,GO:0009987,GO:0010035,GO:0010038,GO:0016740,GO:0016746,GO:0016755,GO:0016756,GO:0019748,GO:0034641,GO:0042221,GO:0043043,GO:0043167,GO:0043169,GO:0043603,GO:0043604,GO:0044237,GO:0044249,GO:0044271,GO:0044550,GO:0044699,GO:0044710,GO:0044711,GO:0044763,GO:0046872,GO:0046937,GO:0046938,GO:0050896,GO:0071704,GO:…
GSADVT00011107001	6mA	GO:0003674,GO:0003824,GO:0005488,GO:0048037,GO:0050662
GSADVT00001991001	6mA	GO:0003674,GO:0003824,GO:0005575,GO:0005576,GO:0005975,GO:0005976,GO:0006629,GO:0008150,GO:0008152,GO:0008653,GO:0009987,GO:0016787,GO:0016788,GO:0031347,GO:0031348,GO:0032101,GO:0032102,GO:0043170,GO:0044237,GO:0044238,GO:0044255,GO:0044260,GO:0044262,GO:0044264,GO:0044699,GO:0044710,GO:0044723,GO:0044763,GO:0048519,GO:0048583,GO:0048585,GO:0050528,GO:0050727,GO:0050728,GO:0050789,GO:0052689,GO:…
GSADVT00012858001	6mA	GO:0003674,GO:0003824,GO:0005575,GO:0005576,GO:0006629,GO:0006643,GO:0006665,GO:0006672,GO:0006807,GO:0008150,GO:0008152,GO:0009987,GO:0016787,GO:0016810,GO:0016811,GO:0017040,GO:0044237,GO:0044238,GO:0044255,GO:0044699,GO:0044710,GO:0044763,GO:0071704,GO:1901564
GSADVT00006091001	6mA	GO:0003674,GO:0003824,GO:0005575,GO:0005615,GO:0005783,GO:0005789,GO:0006629,GO:0006643,GO:0006665,GO:0006666,GO:0006807,GO:0008150,GO:0008152,GO:0008610,GO:0009058,GO:0009987,GO:0016020,GO:0016021,GO:0016491,GO:0016614,GO:0016616,GO:0030148,GO:0031090,GO:0031224,GO:0042180,GO:0043226,GO:0043227,GO:0043229,GO:0043231,GO:0044237,GO:0044238,GO:0044249,GO:0044255,GO:0044281,GO:0044421,GO:0044422,GO:…
GSADVT00020266001	6mA	GO:0003674,GO:0003824,GO:0005575,GO:0005622,GO:0005759,GO:0006139,GO:0006152,GO:0006163,GO:0006195,GO:0006725,GO:0006753,GO:0006793,GO:0006796,GO:0006807,GO:0008150,GO:0008152,GO:0009056,GO:0009116,GO:0009117,GO:0009119,GO:0009123,GO:0009125,GO:0009126,GO:0009128,GO:0009132,GO:0009134,GO:0009135,GO:0009137,GO:0009150,GO:0009154,GO:0009158,GO:0009161,GO:0009164,GO:0009166,GO:0009167,GO:0009169,GO:…
GSADVT00005869001	6mA	GO:0003674,GO:0003824,GO:0005575,GO:0005623,GO:0006508,GO:0006810,GO:0006887,GO:0008150,GO:0008152,GO:0008233,GO:0008238,GO:0009987,GO:0016192,GO:0016787,GO:0016805,GO:0019538,GO:0032940,GO:0043170,GO:0044238,GO:0044699,GO:0044763,GO:0044765,GO:0046903,GO:0051179,GO:0051234,GO:0051649,GO:0070011,GO:0071704,GO:1902578
GSADVT00022089001	6mA	GO:0003674,GO:0003824,GO:0005575,GO:0005634,GO:0005737,GO:0005829,GO:0006139,GO:0006152,GO:0006213,GO:0006725,GO:0006732,GO:0006733,GO:0006753,GO:0006793,GO:0006796,GO:0006807,GO:0008150,GO:0008152,GO:0008477,GO:0008655,GO:0009056,GO:0009058,GO:0009108,GO:0009116,GO:0009117,GO:0009164,GO:0009165,GO:0009435,GO:0009987,GO:0016787,GO:0016798,GO:0016799,GO:0018130,GO:0019357,GO:0019358,GO:0019359,GO:…
GSADVT00007683001	6mA	GO:0003674,GO:0003824,GO:0005575,GO:0005634,GO:0005759,GO:0008168,GO:0008173,GO:0008175,GO:0008757,GO:0009019,GO:0016423,GO:0016740,GO:0016741,GO:0031974,GO:0043226,GO:0043227,GO:0043229,GO:0043231,GO:0043233,GO:0044422,GO:0044424,GO:0044429,GO:0044444,GO:0044446,GO:0044464,GO:0052906,GO:0070013
GSADVT00066592001	6mA	GO:0003674,GO:0003824,GO:0005575,GO:0005737,GO:0005975,GO:0006066,GO:0006629,GO:0006694,GO:0006810,GO:0006914,GO:0008104,GO:0008150,GO:0008152,GO:0008194,GO:0008202,GO:0008610,GO:0009056,GO:0009058,GO:0009987,GO:0015031,GO:0016020,GO:0016125,GO:0016126,GO:0016740,GO:0016757,GO:0016758,GO:0016906,GO:0030258,GO:0030259,GO:0033036,GO:0035251,GO:0044237,GO:0044238,GO:0044248,GO:0044255,GO:0044281,GO:…
GSADVT00041009001	6mA	GO:0003674,GO:0003824,GO:0005575,GO:0005737,GO:0006629,GO:0008150,GO:0008152,GO:0016021,GO:0016491,GO:0016627,GO:0031224,GO:0044238,GO:0044424,GO:0044425,GO:0044464,GO:0044699,GO:0044710,GO:0071704
GSADVT00034830001	6mA	GO:0003674,GO:0003824,GO:0005575,GO:0005739,GO:0006464,GO:0008150,GO:0008152,GO:0009249,GO:0009987,GO:0016740,GO:0016746,GO:0018065,GO:0019538,GO:0036211,GO:0043170,GO:0043226,GO:0043227,GO:0043229,GO:0043231,GO:0043412,GO:0044237,GO:0044238,GO:0044260,GO:0044267,GO:0044424,GO:0044444,GO:0044464,GO:0071704
GSADVT00012473001	6mA	GO:0003674,GO:0003824,GO:0005575,GO:0005777,GO:0006576,GO:0006595,GO:0006598,GO:0006807,GO:0008150,GO:0008152,GO:0009056,GO:0009308,GO:0009310,GO:0009987,GO:0016491,GO:0016645,GO:0016647,GO:0034641,GO:0042402,GO:0042579,GO:0043226,GO:0043227,GO:0043229,GO:0043231,GO:0044106,GO:0044237,GO:0044424,GO:0044444,GO:0044464,GO:0044699,GO:0044710,GO:0046592,GO:0055114,GO:0071704,GO:1901564,GO:1901565,GO:…
GSADVT00027162001	6mA	GO:0003674,GO:0003824,GO:0005575,GO:0005789,GO:0006465,GO:0006518,GO:0006807,GO:0008150,GO:0008152,GO:0008233,GO:0008236,GO:0009987,GO:0016020,GO:0016021,GO:0016485,GO:0016787,GO:0017171,GO:0019538,GO:0031090,GO:0031224,GO:0034641,GO:0043170,GO:0043603,GO:0044237,GO:0044238,GO:0044260,GO:0044267,GO:0044422,GO:0044424,GO:0044425,GO:0044432,GO:0044444,GO:0044446,GO:0044464,GO:0070011,GO:0071704,GO:…
GSADVT00000862001	6mA	GO:0003674,GO:0003824,GO:0005575,GO:0005829,GO:0006082,GO:0006464,GO:0006479,GO:0006805,GO:0008150,GO:0008152,GO:0008168,GO:0008213,GO:0008276,GO:0008757,GO:0009404,GO:0009987,GO:0016740,GO:0016741,GO:0018872,GO:0019538,GO:0019748,GO:0019752,GO:0030791,GO:0030792,GO:0032259,GO:0032787,GO:0036211,GO:0042221,GO:0043170,GO:0043412,GO:0043414,GO:0043436,GO:0044237,GO:0044238,GO:0044260,GO:0044267,GO:…
GSADVT00027490001	6mA	GO:0003674,GO:0003824,GO:0005575,GO:0005829,GO:0006793,GO:0006796,GO:0008150,GO:0008152,GO:0009987,GO:0016311,GO:0016787,GO:0016788,GO:0016791,GO:0042578,GO:0044237,GO:0044424,GO:0044444,GO:0044464
GSADVT00006342001	6mA	GO:0003674,GO:0003824,GO:0005575,GO:0005829,GO:0006810,GO:0006839,GO:0007584,GO:0008150,GO:0009605,GO:0009719,GO:0009725,GO:0009991,GO:0010033,GO:0014070,GO:0016491,GO:0016645,GO:0016646,GO:0031667,GO:0033273,GO:0033280,GO:0033993,GO:0042221,GO:0044424,GO:0044444,GO:0044464,GO:0044699,GO:0044765,GO:0046907,GO:0047127,GO:0050896,GO:0051179,GO:0051234,GO:0051649,GO:0097305,GO:1901700,GO:1902578,GO:…
GSADVT00008126001	6mA	GO:0003674,GO:0003824,GO:0005575,GO:0005975,GO:0008150,GO:0008152,GO:0008168,GO:0008757,GO:0009058,GO:0009311,GO:0009312,GO:0009877,GO:0016023,GO:0016051,GO:0016740,GO:0016741,GO:0030139,GO:0031410,GO:0031982,GO:0031988,GO:0032259,GO:0043226,GO:0043227,GO:0043229,GO:0043231,GO:0044238,GO:0044403,GO:0044419,GO:0044424,GO:0044444,GO:0044464,GO:0044699,GO:0044710,GO:0044711,GO:0044723,GO:0045335,GO:…
GSADVT00037136001	6mA	GO:0003674,GO:0003824,GO:0005575,GO:0005975,GO:0008150,GO:0008152,GO:0008168,GO:0008757,GO:0009058,GO:0009311,GO:0009312,GO:0009877,GO:0016023,GO:0016051,GO:0016740,GO:0016741,GO:0030139,GO:0031410,GO:0031982,GO:0031988,GO:0032259,GO:0043226,GO:0043227,GO:0043229,GO:0043231,GO:0044238,GO:0044403,GO:0044419,GO:0044424,GO:0044444,GO:0044464,GO:0044699,GO:0044710,GO:0044711,GO:0044723,GO:0045335,GO:…
GSADVT00014305001	6mA	GO:0003674,GO:0003824,GO:0005575,GO:0016021,GO:0016787,GO:0031224,GO:0044425
GSADVT00015320001	6mA	GO:0003674,GO:0003824,GO:0005575,GO:0016021,GO:0016787,GO:0031224,GO:0044425
GSADVT00028912001	6mA	GO:0003674,GO:0003824,GO:0006082,GO:0006629,GO:0006631,GO:0008150,GO:0008152,GO:0009987,GO:0016829,GO:0016835,GO:0016836,GO:0019605,GO:0019752,GO:0032787,GO:0043436,GO:0044237,GO:0044238,GO:0044255,GO:0044281,GO:0044699,GO:0044710,GO:0044763,GO:0046459,GO:0071704
GSADVT00004217001	6mA	GO:0003674,GO:0003824,GO:0006508,GO:0008150,GO:0008152,GO:0008233,GO:0008234,GO:0016787,GO:0019538,GO:0043170,GO:0044238,GO:0070011,GO:0071704
GSADVT00048556001	6mA	GO:0003674,GO:0003824,GO:0006508,GO:0008150,GO:0008152,GO:0008233,GO:0008234,GO:0016787,GO:0019538,GO:0043170,GO:0044238,GO:0070011,GO:0071704
GSADVT00003400001	6mA	GO:0003674,GO:0003824,GO:0008080,GO:0016407,GO:0016410,GO:0016740,GO:0016746,GO:0016747
GSADVT00026377001	6mA	GO:0003674,GO:0003824,GO:0008080,GO:0016407,GO:0016410,GO:0016740,GO:0016746,GO:0016747
GSADVT00058970001	6mA	GO:0003674,GO:0003824,GO:0008150,GO:0008152,GO:0008168,GO:0016740,GO:0016741
GSADVT00021671001	6mA	GO:0003674,GO:0003824,GO:0008150,GO:0008152,GO:0008881,GO:0009058,GO:0009987,GO:0016853,GO:0016854,GO:0016855,GO:0016874,GO:0016999,GO:0017000,GO:0017144,GO:0036361,GO:0044237,GO:0044249,GO:0047661
GSADVT00029936001	6mA	GO:0003674,GO:0003824,GO:0008150,GO:0008152,GO:0009058,GO:0016787,GO:0016788
GSADVT00029225001	6mA	GO:0003674,GO:0003824,GO:0008150,GO:0008152,GO:0016491,GO:0044699,GO:0044710,GO:0055114
GSADVT00003958001	6mA	GO:0003674,GO:0003824,GO:0008168,GO:0016740,GO:0016741
GSADVT00001147001	6mA	GO:0003674,GO:0003824,GO:0008374,GO:0016740,GO:0016746,GO:0016747,GO:0047172,GO:0050734,GO:0050737
GSADVT00007320001	6mA	GO:0003674,GO:0003824,GO:0016491
GSADVT00026412001	6mA	GO:0003674,GO:0003824,GO:0016491
GSADVT00033450001	6mA	GO:0003674,GO:0003824,GO:0016740,GO:0016757
GSADVT00003057001	6mA	GO:0003674,GO:0003824,GO:0016787
GSADVT00007207001	6mA	GO:0003674,GO:0004857,GO:0004866,GO:0004867,GO:0005488,GO:0005539,GO:0005575,GO:0005576,GO:0006810,GO:0006869,GO:0008150,GO:0008152,GO:0008201,GO:0008289,GO:0016021,GO:0019538,GO:0030234,GO:0030414,GO:0031224,GO:0042157,GO:0043167,GO:0043168,GO:0043169,GO:0043170,GO:0044238,GO:0044425,GO:0044699,GO:0044765,GO:0046872,GO:0046914,GO:0051179,GO:0051234,GO:0061134,GO:0061135,GO:0071702,GO:0071704,GO:…
GSADVT00006940001	6mA	GO:0003674,GO:0004857,GO:0004866,GO:0004867,GO:0006950,GO:0008150,GO:0009611,GO:0030234,GO:0030414,GO:0050896,GO:0061134,GO:0061135
GSADVT00000285001	6mA	GO:0003674,GO:0004871,GO:0004872,GO:0004888,GO:0004930,GO:0004997,GO:0005488,GO:0005515,GO:0005575,GO:0005829,GO:0005886,GO:0006873,GO:0006874,GO:0006875,GO:0007165,GO:0007166,GO:0007186,GO:0007204,GO:0008150,GO:0009986,GO:0009987,GO:0016020,GO:0016021,GO:0019725,GO:0030003,GO:0031224,GO:0032092,GO:0038023,GO:0042592,GO:0042802,GO:0042803,GO:0043393,GO:0043496,GO:0044093,GO:0044424,GO:0044425,GO:…
GSADVT00007033001	6mA	GO:0003674,GO:0004871,GO:0004872,GO:0004888,GO:0004930,GO:0004997,GO:0005575,GO:0005886,GO:0005887,GO:0007165,GO:0007166,GO:0007186,GO:0008150,GO:0016020,GO:0016021,GO:0031224,GO:0031226,GO:0038023,GO:0044425,GO:0044459,GO:0044464,GO:0050789,GO:0050794,GO:0060089,GO:0065007
GSADVT00051466001	6mA	GO:0003674,GO:0004871,GO:0004872,GO:0004888,GO:0004930,GO:0005488,GO:0005575,GO:0005886,GO:0007165,GO:0007166,GO:0007186,GO:0008150,GO:0016020,GO:0016021,GO:0031224,GO:0033218,GO:0038023,GO:0042277,GO:0042562,GO:0042923,GO:0044425,GO:0044464,GO:0050789,GO:0050794,GO:0060089,GO:0065007
GSADVT00032413001	6mA	GO:0003674,GO:0004871,GO:0004872,GO:0004888,GO:0004930,GO:0005575,GO:0005886,GO:0007165,GO:0007166,GO:0007186,GO:0008150,GO:0016020,GO:0016021,GO:0016520,GO:0031224,GO:0038023,GO:0044425,GO:0044464,GO:0050789,GO:0050794,GO:0060089,GO:0065007
GSADVT00006398001	6mA	GO:0003674,GO:0004871,GO:0004872,GO:0004888,GO:0004930,GO:0005575,GO:0007165,GO:0007166,GO:0007186,GO:0008150,GO:0016021,GO:0031224,GO:0038023,GO:0044425,GO:0050789,GO:0050794,GO:0060089,GO:0065007
GSADVT00018329001	6mA	GO:0003674,GO:0004871,GO:0004872,GO:0004888,GO:0004930,GO:0005575,GO:0007165,GO:0007166,GO:0007186,GO:0008150,GO:0016021,GO:0031224,GO:0038023,GO:0044425,GO:0050789,GO:0050794,GO:0060089,GO:0065007
GSADVT00027426001	6mA	GO:0003674,GO:0004871,GO:0004872,GO:0004888,GO:0004930,GO:0005575,GO:0007165,GO:0007166,GO:0007186,GO:0008150,GO:0016021,GO:0031224,GO:0038023,GO:0044425,GO:0050789,GO:0050794,GO:0060089,GO:0065007
GSADVT00044263001	6mA	GO:0003674,GO:0004871,GO:0004872,GO:0004888,GO:0004930,GO:0005575,GO:0007165,GO:0007166,GO:0007186,GO:0008150,GO:0016021,GO:0031224,GO:0038023,GO:0044425,GO:0050789,GO:0050794,GO:0060089,GO:0065007
GSADVT00008893001	6mA	GO:0003674,GO:0004871,GO:0004872,GO:0005057,GO:0005215,GO:0005216,GO:0005217,GO:0005220,GO:0005261,GO:0005262,GO:0005575,GO:0005789,GO:0006810,GO:0006811,GO:0006812,GO:0006816,GO:0007275,GO:0007338,GO:0008150,GO:0008324,GO:0009566,GO:0009987,GO:0015075,GO:0015085,GO:0015267,GO:0015276,GO:0015278,GO:0016020,GO:0016021,GO:0022414,GO:0022803,GO:0022834,GO:0022836,GO:0022838,GO:0022857,GO:0022890,GO:…
GSADVT00039248001	6mA	GO:0003674,GO:0004871,GO:0004872,GO:0005215,GO:0005216,GO:0005227,GO:0005261,GO:0005267,GO:0005488,GO:0005515,GO:0005516,GO:0005575,GO:0005886,GO:0006810,GO:0006811,GO:0006812,GO:0006813,GO:0007165,GO:0008150,GO:0008324,GO:0009881,GO:0009987,GO:0015075,GO:0015077,GO:0015079,GO:0015267,GO:0015269,GO:0015672,GO:0016020,GO:0016021,GO:0016057,GO:0016286,GO:0022803,GO:0022836,GO:0022838,GO:0022839,GO:…
GSADVT00060608001	6mA	GO:0003674,GO:0004871,GO:0004872,GO:0005215,GO:0005216,GO:0005227,GO:0005261,GO:0005267,GO:0005488,GO:0005515,GO:0005516,GO:0005575,GO:0005886,GO:0006810,GO:0006811,GO:0006812,GO:0006813,GO:0007165,GO:0008150,GO:0008324,GO:0009881,GO:0009987,GO:0015075,GO:0015077,GO:0015079,GO:0015267,GO:0015269,GO:0015672,GO:0016020,GO:0016021,GO:0016057,GO:0016286,GO:0022803,GO:0022836,GO:0022838,GO:0022839,GO:…
GSADVT00007875001	6mA	GO:0003674,GO:0004889,GO:0005215,GO:0005216,GO:0005230,GO:0005231,GO:0005261,GO:0005575,GO:0005892,GO:0006810,GO:0006811,GO:0006812,GO:0007154,GO:0007267,GO:0007268,GO:0007271,GO:0007274,GO:0008150,GO:0008324,GO:0009719,GO:0009987,GO:0010033,GO:0010243,GO:0014070,GO:0015075,GO:0015267,GO:0015276,GO:0016020,GO:0022803,GO:0022834,GO:0022836,GO:0022838,GO:0022857,GO:0022891,GO:0022892,GO:0023052,GO:…
GSADVT00013451001	6mA	GO:0003674,GO:0004889,GO:0005215,GO:0005216,GO:0005230,GO:0005231,GO:0005261,GO:0005575,GO:0005892,GO:0006810,GO:0006811,GO:0006812,GO:0007154,GO:0007267,GO:0007268,GO:0007271,GO:0007274,GO:0008150,GO:0008324,GO:0009719,GO:0009987,GO:0010033,GO:0010243,GO:0014070,GO:0015075,GO:0015267,GO:0015276,GO:0016020,GO:0022803,GO:0022834,GO:0022836,GO:0022838,GO:0022857,GO:0022891,GO:0022892,GO:0023052,GO:…
GSADVT00015826001	6mA	GO:0003674,GO:0004889,GO:0005215,GO:0005216,GO:0005230,GO:0005231,GO:0005261,GO:0005575,GO:0005892,GO:0006810,GO:0006811,GO:0006812,GO:0007154,GO:0007267,GO:0007268,GO:0007271,GO:0007274,GO:0008150,GO:0008324,GO:0009719,GO:0009987,GO:0010033,GO:0010243,GO:0014070,GO:0015075,GO:0015267,GO:0015276,GO:0016020,GO:0022803,GO:0022834,GO:0022836,GO:0022838,GO:0022857,GO:0022891,GO:0022892,GO:0023052,GO:…
GSADVT00004937001	6mA	GO:0003674,GO:0005085,GO:0005086,GO:0005575,GO:0008150,GO:0009892,GO:0009966,GO:0010563,GO:0010646,GO:0010921,GO:0010923,GO:0012506,GO:0016020,GO:0016021,GO:0019220,GO:0019222,GO:0023051,GO:0030658,GO:0030659,GO:0031090,GO:0031224,GO:0031323,GO:0031324,GO:0032012,GO:0035303,GO:0035305,GO:0043086,GO:0044092,GO:0044422,GO:0044424,GO:0044425,GO:0044433,GO:0044444,GO:0044446,GO:0044464,GO:0045936,GO:…
GSADVT00027876001	6mA	GO:0003674,GO:0005085,GO:0005088,GO:0005089,GO:0005488,GO:0005515,GO:0005575,GO:0005737,GO:0005795,GO:0005856,GO:0007165,GO:0008150,GO:0009966,GO:0010646,GO:0023051,GO:0030054,GO:0035023,GO:0035556,GO:0043226,GO:0043228,GO:0043229,GO:0043232,GO:0044422,GO:0044424,GO:0044431,GO:0044444,GO:0044446,GO:0044464,GO:0045202,GO:0046578,GO:0048583,GO:0050789,GO:0050794,GO:0051056,GO:0065007,GO:1902531
GSADVT00005766001	6mA	GO:0003674,GO:0005085,GO:0005088,GO:0005089,GO:0005488,GO:0005543,GO:0005545,GO:0005575,GO:0005615,GO:0005737,GO:0005886,GO:0006355,GO:0006357,GO:0007165,GO:0007264,GO:0007265,GO:0007266,GO:0008150,GO:0008289,GO:0009889,GO:0009891,GO:0009893,GO:0009966,GO:0010468,GO:0010556,GO:0010557,GO:0010604,GO:0010628,GO:0010646,GO:0016020,GO:0019219,GO:0019222,GO:0023051,GO:0030027,GO:0031323,GO:0031325,GO:…
GSADVT00056128001	6mA	GO:0003674,GO:0005085,GO:0005488,GO:0005509,GO:0005515,GO:0005522,GO:0005543,GO:0005544,GO:0005575,GO:0006996,GO:0007010,GO:0007165,GO:0007264,GO:0007416,GO:0008150,GO:0008289,GO:0009987,GO:0016043,GO:0022607,GO:0030054,GO:0035556,GO:0043167,GO:0043168,GO:0043169,GO:0044456,GO:0044464,GO:0044699,GO:0044763,GO:0045202,GO:0046872,GO:0048786,GO:0050789,GO:0050794,GO:0050808,GO:0065007,GO:0071840,GO:…
GSADVT00031561001	6mA	GO:0003674,GO:0005085,GO:0005575,GO:0005737,GO:0005886,GO:0007165,GO:0007264,GO:0008150,GO:0009966,GO:0010646,GO:0016020,GO:0023051,GO:0032485,GO:0035556,GO:0044424,GO:0044464,GO:0046578,GO:0048583,GO:0050789,GO:0050794,GO:0051056,GO:0065007,GO:1902531
GSADVT00027468001	6mA	GO:0003674,GO:0005096,GO:0005488,GO:0005515,GO:0005575,GO:0005815,GO:0005829,GO:0007049,GO:0008047,GO:0008150,GO:0009893,GO:0009987,GO:0017016,GO:0017137,GO:0019222,GO:0019899,GO:0030234,GO:0030695,GO:0031267,GO:0043085,GO:0043087,GO:0043547,GO:0044093,GO:0044422,GO:0044424,GO:0044430,GO:0044444,GO:0044446,GO:0044464,GO:0044699,GO:0044763,GO:0048518,GO:0050789,GO:0050790,GO:0051020,GO:0051336,GO:…
GSADVT00037419001	6mA	GO:0003674,GO:0005096,GO:0005488,GO:0005575,GO:0008047,GO:0016020,GO:0030234,GO:0030695,GO:0043167,GO:0043169,GO:0046872,GO:0060589
GSADVT00007877001	6mA	GO:0003674,GO:0005096,GO:0005575,GO:0005773,GO:0005776,GO:0006914,GO:0008047,GO:0008150,GO:0008152,GO:0009056,GO:0009893,GO:0009987,GO:0019222,GO:0030234,GO:0030695,GO:0031410,GO:0031982,GO:0033043,GO:0043085,GO:0043087,GO:0043226,GO:0043227,GO:0043229,GO:0043231,GO:0043547,GO:0044088,GO:0044093,GO:0044237,GO:0044248,GO:0044424,GO:0044444,GO:0044464,GO:0048518,GO:0050789,GO:0050790,GO:0050794,GO:…
GSADVT00020743001	6mA	GO:0003674,GO:0005096,GO:0005575,GO:0005773,GO:0005776,GO:0006914,GO:0008047,GO:0008150,GO:0008152,GO:0009056,GO:0009893,GO:0009987,GO:0019222,GO:0030234,GO:0030695,GO:0031410,GO:0031982,GO:0033043,GO:0043085,GO:0043087,GO:0043226,GO:0043227,GO:0043229,GO:0043231,GO:0043547,GO:0044088,GO:0044093,GO:0044237,GO:0044248,GO:0044424,GO:0044444,GO:0044464,GO:0048518,GO:0050789,GO:0050790,GO:0050794,GO:…
GSADVT00045062001	6mA	GO:0003674,GO:0005102,GO:0005126,GO:0005164,GO:0005488,GO:0005515,GO:0005575,GO:0005737,GO:0006355,GO:0006915,GO:0007165,GO:0008150,GO:0008219,GO:0008270,GO:0009889,GO:0009966,GO:0009987,GO:0010468,GO:0010556,GO:0010646,GO:0010941,GO:0012501,GO:0016265,GO:0019219,GO:0019222,GO:0019899,GO:0023051,GO:0031323,GO:0031326,GO:0031625,GO:0031996,GO:0032813,GO:0042981,GO:0043067,GO:0043167,GO:0043169,GO:…
GSADVT00001139001	6mA	GO:0003674,GO:0005102,GO:0005179,GO:0005488,GO:0005515,GO:0005575,GO:0005576
GSADVT00046930001	6mA	GO:0003674,GO:0005102,GO:0005488,GO:0005515,GO:0005575,GO:0008083,GO:0016020
GSADVT00004189001	6mA	GO:0003674,GO:0005198,GO:0005201,GO:0005575,GO:0005581,GO:0005604,GO:0032991,GO:0043234,GO:0044420,GO:0044421
GSADVT00062154001	6mA	GO:0003674,GO:0005198,GO:0005201,GO:0005575,GO:0005581,GO:0032991,GO:0043234
GSADVT00011691001	6mA	GO:0003674,GO:0005198,GO:0005488,GO:0005515,GO:0005575,GO:0005737,GO:0005882,GO:0032991,GO:0043234,GO:0044422,GO:0044424,GO:0044430,GO:0044446,GO:0044464
GSADVT00043938001	6mA	GO:0003674,GO:0005198,GO:0005488,GO:0005515,GO:0005575,GO:0006461,GO:0008104,GO:0008150,GO:0010035,GO:0010038,GO:0016020,GO:0016043,GO:0019899,GO:0022607,GO:0033036,GO:0042221,GO:0043933,GO:0050896,GO:0051179,GO:0051259,GO:0051260,GO:0065003,GO:0071822,GO:0071840
GSADVT00027887001	6mA	GO:0003674,GO:0005198,GO:0005575,GO:0005737,GO:0005882,GO:0032991,GO:0043234,GO:0044422,GO:0044424,GO:0044430,GO:0044446,GO:0044464
GSADVT00000271001	6mA	GO:0003674,GO:0005215,GO:0005216,GO:0005227,GO:0005244,GO:0005249,GO:0005261,GO:0005267,GO:0005488,GO:0005575,GO:0006810,GO:0006811,GO:0006812,GO:0006813,GO:0008076,GO:0008150,GO:0008324,GO:0015075,GO:0015077,GO:0015079,GO:0015267,GO:0015269,GO:0015672,GO:0016020,GO:0022803,GO:0022832,GO:0022836,GO:0022838,GO:0022839,GO:0022843,GO:0022857,GO:0022890,GO:0022891,GO:0022892,GO:0030001,GO:0032991,GO:…
GSADVT00021065001	6mA	GO:0003674,GO:0005215,GO:0005216,GO:0005242,GO:0005244,GO:0005249,GO:0005251,GO:0005261,GO:0005267,GO:0005575,GO:0005886,GO:0006461,GO:0006810,GO:0006811,GO:0007154,GO:0007267,GO:0007268,GO:0008076,GO:0008150,GO:0008324,GO:0009987,GO:0015075,GO:0015077,GO:0015079,GO:0015267,GO:0015276,GO:0016020,GO:0016043,GO:0022607,GO:0022803,GO:0022832,GO:0022834,GO:0022836,GO:0022838,GO:0022843,GO:0022857,GO:…
GSADVT00029434001	6mA	GO:0003674,GO:0005215,GO:0005216,GO:0005244,GO:0005245,GO:0005246,GO:0005261,GO:0005262,GO:0005488,GO:0005575,GO:0005891,GO:0006810,GO:0006811,GO:0006812,GO:0006816,GO:0008150,GO:0008324,GO:0010959,GO:0015075,GO:0015085,GO:0015267,GO:0016247,GO:0022803,GO:0022832,GO:0022836,GO:0022838,GO:0022843,GO:0022857,GO:0022890,GO:0022891,GO:0022892,GO:0030001,GO:0032879,GO:0032991,GO:0034702,GO:0034703,GO:…
GSADVT00032483001	6mA	GO:0003674,GO:0005215,GO:0005216,GO:0005261,GO:0005262,GO:0005488,GO:0005509,GO:0005515,GO:0005575,GO:0006810,GO:0006811,GO:0006812,GO:0006816,GO:0008150,GO:0008324,GO:0009581,GO:0009582,GO:0009605,GO:0009612,GO:0009628,GO:0009987,GO:0015075,GO:0015085,GO:0015267,GO:0016020,GO:0016021,GO:0022803,GO:0022838,GO:0022857,GO:0022890,GO:0022891,GO:0022892,GO:0030001,GO:0030246,GO:0031224,GO:0034220,GO:…
GSADVT00035499001	6mA	GO:0003674,GO:0005215,GO:0005216,GO:0005261,GO:0005262,GO:0005575,GO:0005622,GO:0005886,GO:0006461,GO:0006810,GO:0006811,GO:0006812,GO:0006816,GO:0006873,GO:0006874,GO:0006875,GO:0007165,GO:0007166,GO:0007186,GO:0007204,GO:0007215,GO:0007216,GO:0008150,GO:0008324,GO:0009314,GO:0009416,GO:0009628,GO:0009987,GO:0015075,GO:0015085,GO:0015267,GO:0016020,GO:0016021,GO:0016043,GO:0016482,GO:0019725,GO:…
GSADVT00008970001	6mA	GO:0003674,GO:0005215,GO:0005216,GO:0005575,GO:0005886,GO:0006810,GO:0008150,GO:0015075,GO:0015267,GO:0016020,GO:0016021,GO:0022803,GO:0022838,GO:0022857,GO:0022891,GO:0022892,GO:0031224,GO:0044425,GO:0044464,GO:0051179,GO:0051234
GSADVT00049413001	6mA	GO:0003674,GO:0005215,GO:0005243,GO:0005575,GO:0005886,GO:0005911,GO:0005921,GO:0006810,GO:0006811,GO:0008150,GO:0009987,GO:0015267,GO:0016020,GO:0016021,GO:0022803,GO:0022829,GO:0022857,GO:0030054,GO:0031224,GO:0034220,GO:0044425,GO:0044464,GO:0044699,GO:0044763,GO:0044765,GO:0051179,GO:0051234,GO:0055077,GO:0055085,GO:1902578
GSADVT00001170001	6mA	GO:0003674,GO:0005215,GO:0005243,GO:0005575,GO:0005886,GO:0005911,GO:0005921,GO:0006810,GO:0006811,GO:0008150,GO:0009987,GO:0015267,GO:0016020,GO:0016021,GO:0022803,GO:0022829,GO:0022857,GO:0030054,GO:0031224,GO:0044425,GO:0044464,GO:0044699,GO:0044763,GO:0044765,GO:0051179,GO:0051234,GO:0055077,GO:0055085,GO:1902578
GSADVT00027453001	6mA	GO:0003674,GO:0005215,GO:0005283,GO:0005294,GO:0005326,GO:0005328,GO:0005342,GO:0005343,GO:0005416,GO:0005575,GO:0005886,GO:0005887,GO:0006810,GO:0006811,GO:0006812,GO:0006820,GO:0006836,GO:0006865,GO:0007154,GO:0007267,GO:0007268,GO:0007270,GO:0008150,GO:0008324,GO:0008509,GO:0008514,GO:0009987,GO:0015075,GO:0015077,GO:0015081,GO:0015171,GO:0015175,GO:0015179,GO:0015187,GO:0015291,GO:0015293,GO:…
GSADVT00050561001	6mA	GO:0003674,GO:0005215,GO:0005319,GO:0005548,GO:0005575,GO:0005737,GO:0006810,GO:0006811,GO:0006820,GO:0006869,GO:0008150,GO:0008526,GO:0009987,GO:0015711,GO:0015748,GO:0015914,GO:0022892,GO:0044424,GO:0044464,GO:0044699,GO:0044765,GO:0051179,GO:0051234,GO:0071554,GO:0071702,GO:0071852,GO:1902578
GSADVT00034282001	6mA	GO:0003674,GO:0005215,GO:0005342,GO:0005575,GO:0005743,GO:0006810,GO:0006811,GO:0006820,GO:0006839,GO:0006848,GO:0006850,GO:0008028,GO:0008150,GO:0008509,GO:0008514,GO:0009987,GO:0015075,GO:0015711,GO:0015718,GO:0015849,GO:0016020,GO:0016021,GO:0019866,GO:0022857,GO:0022891,GO:0022892,GO:0031090,GO:0031224,GO:0031966,GO:0034220,GO:0044422,GO:0044424,GO:0044425,GO:0044429,GO:0044444,GO:0044446,GO:…
GSADVT00013871001	6mA	GO:0003674,GO:0005215,GO:0005342,GO:0005575,GO:0005774,GO:0005886,GO:0006810,GO:0006811,GO:0006812,GO:0006820,GO:0006846,GO:0006847,GO:0007049,GO:0008028,GO:0008150,GO:0008324,GO:0008509,GO:0008514,GO:0008519,GO:0009987,GO:0015075,GO:0015077,GO:0015101,GO:0015103,GO:0015123,GO:0015672,GO:0015696,GO:0015698,GO:0015711,GO:0015718,GO:0015849,GO:0016020,GO:0016021,GO:0019740,GO:0022857,GO:0022890,GO:…
GSADVT00004791001	6mA	GO:0003674,GO:0005215,GO:0005355,GO:0005488,GO:0005536,GO:0005575,GO:0005886,GO:0005887,GO:0005975,GO:0006810,GO:0008150,GO:0008152,GO:0008643,GO:0008645,GO:0009987,GO:0015144,GO:0015145,GO:0015149,GO:0015749,GO:0015758,GO:0016020,GO:0016021,GO:0022857,GO:0022891,GO:0022892,GO:0030246,GO:0031224,GO:0031226,GO:0044238,GO:0044281,GO:0044425,GO:0044459,GO:0044464,GO:0044699,GO:0044710,GO:0044763,GO:…
GSADVT00007204001	6mA	GO:0003674,GO:0005215,GO:0005427,GO:0005575,GO:0005886,GO:0005887,GO:0005903,GO:0006810,GO:0006811,GO:0006812,GO:0006818,GO:0007586,GO:0008104,GO:0008150,GO:0008324,GO:0009987,GO:0015031,GO:0015075,GO:0015197,GO:0015198,GO:0015291,GO:0015293,GO:0015294,GO:0015295,GO:0015322,GO:0015333,GO:0015672,GO:0015992,GO:0016020,GO:0016021,GO:0022804,GO:0022857,GO:0022891,GO:0022892,GO:0022897,GO:0031224,GO:…
GSADVT00036653001	6mA	GO:0003674,GO:0005215,GO:0005488,GO:0005504,GO:0005575,GO:0005634,GO:0008289,GO:0031406,GO:0033293,GO:0036094,GO:0043167,GO:0043168,GO:0043177,GO:0043226,GO:0043227,GO:0043229,GO:0043231,GO:0044424,GO:0044444,GO:0044464,GO:0048471
GSADVT00012970001	6mA	GO:0003674,GO:0005215,GO:0005488,GO:0005515,GO:0005575,GO:0005622,GO:0005634,GO:0005829,GO:0006606,GO:0006810,GO:0006886,GO:0006913,GO:0006950,GO:0008104,GO:0008150,GO:0008565,GO:0009266,GO:0009408,GO:0009628,GO:0009987,GO:0015031,GO:0016482,GO:0017038,GO:0022892,GO:0030544,GO:0031072,GO:0033036,GO:0033365,GO:0033554,GO:0034504,GO:0034605,GO:0034613,GO:0043226,GO:0043227,GO:0043229,GO:0043231,GO:…
GSADVT00004893001	6mA	GO:0003674,GO:0005215,GO:0005488,GO:0005543,GO:0005575,GO:0005768,GO:0005802,GO:0006996,GO:0007033,GO:0007040,GO:0008150,GO:0008289,GO:0009987,GO:0010008,GO:0016020,GO:0016023,GO:0016043,GO:0030135,GO:0030136,GO:0031090,GO:0031410,GO:0031901,GO:0031982,GO:0031988,GO:0035091,GO:0043167,GO:0043168,GO:0043226,GO:0043227,GO:0043229,GO:0043231,GO:0044422,GO:0044424,GO:0044431,GO:0044440,GO:0044444,GO:…
GSADVT00002665001	6mA	GO:0003674,GO:0005215,GO:0005575,GO:0005783,GO:0005789,GO:0005886,GO:0005887,GO:0006810,GO:0006811,GO:0006820,GO:0006857,GO:0008104,GO:0008150,GO:0008509,GO:0008514,GO:0009987,GO:0010035,GO:0010038,GO:0015031,GO:0015075,GO:0015197,GO:0015198,GO:0015711,GO:0015833,GO:0016020,GO:0016021,GO:0022857,GO:0022891,GO:0022892,GO:0031090,GO:0031224,GO:0031226,GO:0031520,GO:0033036,GO:0034220,GO:0034634,GO:…
GSADVT00051730001	6mA	GO:0003674,GO:0005215,GO:0005575,GO:0005783,GO:0005887,GO:0006810,GO:0006811,GO:0006820,GO:0006862,GO:0008150,GO:0009987,GO:0015215,GO:0015605,GO:0015663,GO:0015748,GO:0015890,GO:0015931,GO:0015932,GO:0016021,GO:0022857,GO:0022891,GO:0022892,GO:0031224,GO:0031226,GO:0035353,GO:0043226,GO:0043227,GO:0043229,GO:0043231,GO:0044424,GO:0044425,GO:0044444,GO:0044459,GO:0044464,GO:0044699,GO:0044763,GO:…
GSADVT00040525001	6mA	GO:0003674,GO:0005215,GO:0005575,GO:0005886,GO:0006810,GO:0006811,GO:0006812,GO:0006820,GO:0008150,GO:0008324,GO:0008509,GO:0008519,GO:0015075,GO:0015077,GO:0015101,GO:0015103,GO:0015672,GO:0015696,GO:0015698,GO:0016020,GO:0016021,GO:0022857,GO:0022890,GO:0022891,GO:0022892,GO:0031224,GO:0044425,GO:0044464,GO:0044699,GO:0044765,GO:0051179,GO:0051234,GO:0071705,GO:1902578
GSADVT00005172001	6mA	GO:0003674,GO:0005215,GO:0005575,GO:0006810,GO:0006811,GO:0006812,GO:0006814,GO:0006820,GO:0008150,GO:0008509,GO:0009987,GO:0015075,GO:0015103,GO:0015114,GO:0015291,GO:0015293,GO:0015672,GO:0016021,GO:0022804,GO:0022857,GO:0022891,GO:0022892,GO:0030001,GO:0031224,GO:0044425,GO:0044699,GO:0044763,GO:0044765,GO:0051179,GO:0051234,GO:0055085,GO:1902578
GSADVT00000291001	6mA	GO:0003674,GO:0005215,GO:0005575,GO:0006810,GO:0006811,GO:0006812,GO:0006814,GO:0008150,GO:0009987,GO:0015291,GO:0015293,GO:0015672,GO:0016020,GO:0016021,GO:0022804,GO:0022857,GO:0030001,GO:0031224,GO:0044425,GO:0044699,GO:0044763,GO:0044765,GO:0051179,GO:0051234,GO:0055085,GO:1902578
GSADVT00001051001	6mA	GO:0003674,GO:0005215,GO:0005575,GO:0006810,GO:0006811,GO:0006812,GO:0008150,GO:0008324,GO:0009987,GO:0015075,GO:0016021,GO:0022857,GO:0022891,GO:0022892,GO:0031224,GO:0044425,GO:0044699,GO:0044763,GO:0044765,GO:0051179,GO:0051234,GO:0055085,GO:1902578
GSADVT00046687001	6mA	GO:0003674,GO:0005215,GO:0005575,GO:0006810,GO:0006811,GO:0006820,GO:0006865,GO:0008150,GO:0015711,GO:0015849,GO:0030288,GO:0042597,GO:0044462,GO:0044464,GO:0044699,GO:0044765,GO:0046942,GO:0051179,GO:0051234,GO:0071702,GO:0071705,GO:1902578
GSADVT00021500001	6mA	GO:0003674,GO:0005215,GO:0005575,GO:0006810,GO:0006811,GO:0006820,GO:0006915,GO:0008150,GO:0008219,GO:0008493,GO:0008509,GO:0008514,GO:0009987,GO:0012501,GO:0012506,GO:0015075,GO:0015711,GO:0015850,GO:0015893,GO:0015904,GO:0016020,GO:0016021,GO:0016265,GO:0019534,GO:0022857,GO:0022891,GO:0022892,GO:0030659,GO:0031090,GO:0031224,GO:0031253,GO:0031526,GO:0042891,GO:0042895,GO:0043252,GO:0044422,GO:…
GSADVT00037148001	6mA	GO:0003674,GO:0005215,GO:0005575,GO:0006810,GO:0008150,GO:0015931,GO:0015932,GO:0016021,GO:0022857,GO:0022884,GO:0022891,GO:0022892,GO:0031224,GO:0033227,GO:0044425,GO:0044699,GO:0044765,GO:0050657,GO:0050658,GO:0051032,GO:0051033,GO:0051179,GO:0051234,GO:0051236,GO:0071702,GO:0071705,GO:1902578
GSADVT00029507001	6mA	GO:0003674,GO:0005488,GO:0005509,GO:0005515,GO:0005575,GO:0005783,GO:0007165,GO:0008150,GO:0016021,GO:0019722,GO:0019932,GO:0031224,GO:0035556,GO:0043167,GO:0043169,GO:0043226,GO:0043227,GO:0043229,GO:0043231,GO:0044424,GO:0044425,GO:0044444,GO:0044464,GO:0046872,GO:0050789,GO:0050794,GO:0065007
GSADVT00003821001	6mA	GO:0003674,GO:0005488,GO:0005509,GO:0005575,GO:0005576,GO:0007155,GO:0007160,GO:0008150,GO:0022610,GO:0031589,GO:0043167,GO:0043169,GO:0046872
GSADVT00019386001	6mA	GO:0003674,GO:0005488,GO:0005509,GO:0005575,GO:0005737,GO:0043167,GO:0043169,GO:0044424,GO:0044464,GO:0046872
GSADVT00035804001	6mA	GO:0003674,GO:0005488,GO:0005509,GO:0005575,GO:0005886,GO:0005887,GO:0005911,GO:0007154,GO:0007155,GO:0007156,GO:0007267,GO:0007399,GO:0008150,GO:0009987,GO:0016020,GO:0016021,GO:0022610,GO:0023052,GO:0030054,GO:0031224,GO:0031226,GO:0032502,GO:0043167,GO:0043169,GO:0044425,GO:0044459,GO:0044464,GO:0044699,GO:0044700,GO:0044763,GO:0046872,GO:0048731,GO:0048856,GO:0098609,GO:0098742
GSADVT00048369001	6mA	GO:0003674,GO:0005488,GO:0005509,GO:0005575,GO:0005886,GO:0005887,GO:0007155,GO:0007156,GO:0008150,GO:0009892,GO:0010563,GO:0010921,GO:0010923,GO:0016020,GO:0016021,GO:0019220,GO:0019222,GO:0022610,GO:0031224,GO:0031226,GO:0031323,GO:0031324,GO:0031982,GO:0031988,GO:0035303,GO:0035305,GO:0043086,GO:0043167,GO:0043169,GO:0043226,GO:0043227,GO:0043230,GO:0044092,GO:0044421,GO:0044425,GO:0044459,GO:…
GSADVT00000043001	6mA	GO:0003674,GO:0005488,GO:0005509,GO:0005575,GO:0005886,GO:0007155,GO:0007156,GO:0008150,GO:0016020,GO:0016021,GO:0022610,GO:0031224,GO:0043167,GO:0043169,GO:0044425,GO:0044464,GO:0046872,GO:0098609,GO:0098742
GSADVT00004879001	6mA	GO:0003674,GO:0005488,GO:0005509,GO:0043167,GO:0043169,GO:0046872
GSADVT00017993001	6mA	GO:0003674,GO:0005488,GO:0005509,GO:0043167,GO:0043169,GO:0046872
GSADVT00019593001	6mA	GO:0003674,GO:0005488,GO:0005509,GO:0043167,GO:0043169,GO:0046872
GSADVT00028292001	6mA	GO:0003674,GO:0005488,GO:0005509,GO:0043167,GO:0043169,GO:0046872
GSADVT00029449001	6mA	GO:0003674,GO:0005488,GO:0005509,GO:0043167,GO:0043169,GO:0046872
GSADVT00041079001	6mA	GO:0003674,GO:0005488,GO:0005509,GO:0043167,GO:0043169,GO:0046872
GSADVT00047829001	6mA	GO:0003674,GO:0005488,GO:0005509,GO:0043167,GO:0043169,GO:0046872
GSADVT00004371001	6mA	GO:0003674,GO:0005488,GO:0005515
GSADVT00005904001	6mA	GO:0003674,GO:0005488,GO:0005515
GSADVT00007038001	6mA	GO:0003674,GO:0005488,GO:0005515
GSADVT00009056001	6mA	GO:0003674,GO:0005488,GO:0005515
GSADVT00015163001	6mA	GO:0003674,GO:0005488,GO:0005515
GSADVT00015841001	6mA	GO:0003674,GO:0005488,GO:0005515
GSADVT00031096001	6mA	GO:0003674,GO:0005488,GO:0005515
GSADVT00033080001	6mA	GO:0003674,GO:0005488,GO:0005515
GSADVT00033574001	6mA	GO:0003674,GO:0005488,GO:0005515
GSADVT00035134001	6mA	GO:0003674,GO:0005488,GO:0005515
GSADVT00035964001	6mA	GO:0003674,GO:0005488,GO:0005515
GSADVT00036312001	6mA	GO:0003674,GO:0005488,GO:0005515
GSADVT00040865001	6mA	GO:0003674,GO:0005488,GO:0005515
GSADVT00044474001	6mA	GO:0003674,GO:0005488,GO:0005515
GSADVT00045796001	6mA	GO:0003674,GO:0005488,GO:0005515
GSADVT00045940001	6mA	GO:0003674,GO:0005488,GO:0005515
GSADVT00049688001	6mA	GO:0003674,GO:0005488,GO:0005515
GSADVT00063373001	6mA	GO:0003674,GO:0005488,GO:0005515
GSADVT00063396001	6mA	GO:0003674,GO:0005488,GO:0005515
GSADVT00000102001	6mA	GO:0003674,GO:0005488,GO:0005515,GO:0005575,GO:0005634,GO:0005737,GO:0005829,GO:0006082,GO:0006725,GO:0006807,GO:0006928,GO:0007015,GO:0007596,GO:0007599,GO:0008064,GO:0008150,GO:0008152,GO:0009987,GO:0010638,GO:0010720,GO:0010769,GO:0010770,GO:0010810,GO:0010811,GO:0016043,GO:0016477,GO:0022603,GO:0022604,GO:0022607,GO:0030027,GO:0030030,GO:0030031,GO:0030032,GO:0030155,GO:0030334,GO:0030335,GO:…
GSADVT00021749001	6mA	GO:0003674,GO:0005488,GO:0005515,GO:0005575,GO:0005634,GO:0005737,GO:0005856,GO:0008150,GO:0009966,GO:0009968,GO:0010646,GO:0010648,GO:0010941,GO:0015629,GO:0023051,GO:0023057,GO:0042981,GO:0043066,GO:0043067,GO:0043069,GO:0043226,GO:0043227,GO:0043228,GO:0043229,GO:0043231,GO:0043232,GO:0044424,GO:0044464,GO:0048519,GO:0048523,GO:0048583,GO:0048585,GO:0050789,GO:0050794,GO:0060548,GO:0065007,GO:…
GSADVT00027926001	6mA	GO:0003674,GO:0005488,GO:0005515,GO:0005575,GO:0005737,GO:0005829,GO:0005856,GO:0005886,GO:0005912,GO:0005924,GO:0005925,GO:0008092,GO:0008150,GO:0009987,GO:0016020,GO:0016043,GO:0016528,GO:0022607,GO:0030018,GO:0030054,GO:0030055,GO:0030506,GO:0032502,GO:0034329,GO:0034330,GO:0042383,GO:0043034,GO:0043226,GO:0043228,GO:0043229,GO:0043232,GO:0044422,GO:0044424,GO:0044444,GO:0044449,GO:0044464,GO:…
GSADVT00032754001	6mA	GO:0003674,GO:0005488,GO:0005515,GO:0005575,GO:0005737,GO:0005856,GO:0043226,GO:0043228,GO:0043229,GO:0043232,GO:0044424,GO:0044464
GSADVT00006341001	6mA	GO:0003674,GO:0005488,GO:0005515,GO:0005575,GO:0005737,GO:0006457,GO:0006461,GO:0008150,GO:0008152,GO:0009987,GO:0016043,GO:0016272,GO:0019538,GO:0022607,GO:0032991,GO:0034622,GO:0043170,GO:0043234,GO:0043623,GO:0043933,GO:0044237,GO:0044238,GO:0044260,GO:0044267,GO:0044424,GO:0044464,GO:0051082,GO:0051087,GO:0051131,GO:0065003,GO:0071704,GO:0071822,GO:0071840
GSADVT00036787001	6mA	GO:0003674,GO:0005488,GO:0005515,GO:0005575,GO:0005737,GO:0006457,GO:0008022,GO:0008150,GO:0008152,GO:0009987,GO:0010468,GO:0010608,GO:0019222,GO:0019538,GO:0019899,GO:0019900,GO:0019901,GO:0031072,GO:0031253,GO:0031256,GO:0031435,GO:0031647,GO:0032587,GO:0032991,GO:0043170,GO:0043234,GO:0043422,GO:0044237,GO:0044238,GO:0044260,GO:0044267,GO:0044424,GO:0044425,GO:0044459,GO:0044463,GO:0044464,GO:…
GSADVT00018583001	6mA	GO:0003674,GO:0005488,GO:0005515,GO:0005575,GO:0005737,GO:0008150,GO:0010921,GO:0019220,GO:0019222,GO:0019899,GO:0019902,GO:0019903,GO:0031323,GO:0035303,GO:0043666,GO:0044424,GO:0044464,GO:0050789,GO:0050790,GO:0050794,GO:0051174,GO:0051336,GO:0065007,GO:0065009
GSADVT00056290001	6mA	GO:0003674,GO:0005488,GO:0005515,GO:0005575,GO:0005737,GO:0044424,GO:0044464
GSADVT00041776001	6mA	GO:0003674,GO:0005488,GO:0005515,GO:0005575,GO:0005765,GO:0005768,GO:0005769,GO:0005770,GO:0005774,GO:0005798,GO:0005829,GO:0005856,GO:0006605,GO:0006623,GO:0006810,GO:0006886,GO:0006887,GO:0006906,GO:0006914,GO:0006996,GO:0007033,GO:0007034,GO:0007041,GO:0008017,GO:0008092,GO:0008104,GO:0008150,GO:0008152,GO:0008270,GO:0008333,GO:0009056,GO:0009987,GO:0010008,GO:0015031,GO:0015630,GO:0015631,GO:…
GSADVT00016921001	6mA	GO:0003674,GO:0005488,GO:0005515,GO:0005575,GO:0005768,GO:0005829,GO:0006810,GO:0006897,GO:0007009,GO:0007015,GO:0008150,GO:0008289,GO:0009653,GO:0009987,GO:0012506,GO:0016020,GO:0016043,GO:0016192,GO:0030030,GO:0030054,GO:0030100,GO:0030659,GO:0031090,GO:0031253,GO:0031256,GO:0032502,GO:0032587,GO:0032879,GO:0032989,GO:0032990,GO:0042995,GO:0043005,GO:0043226,GO:0043227,GO:0043229,GO:0043231,GO:…
GSADVT00003227001	6mA	GO:0003674,GO:0005488,GO:0005515,GO:0005575,GO:0005783,GO:0008289,GO:0016021,GO:0031224,GO:0043167,GO:0043169,GO:0043226,GO:0043227,GO:0043229,GO:0043231,GO:0044424,GO:0044425,GO:0044444,GO:0044464,GO:0046872
GSADVT00011857001	6mA	GO:0003674,GO:0005488,GO:0005515,GO:0005575,GO:0005829,GO:0006461,GO:0006810,GO:0006887,GO:0006996,GO:0008104,GO:0008150,GO:0008289,GO:0009987,GO:0012506,GO:0015031,GO:0015844,GO:0015850,GO:0016020,GO:0016043,GO:0016050,GO:0016082,GO:0016192,GO:0019899,GO:0019900,GO:0019901,GO:0022607,GO:0030054,GO:0030659,GO:0031090,GO:0032940,GO:0033036,GO:0034622,GO:0043167,GO:0043169,GO:0043623,GO:0043933,GO:…
GSADVT00004824001	6mA	GO:0003674,GO:0005488,GO:0005515,GO:0005575,GO:0005886,GO:0008150,GO:0009892,GO:0010563,GO:0010921,GO:0010923,GO:0016020,GO:0019220,GO:0019222,GO:0030054,GO:0031323,GO:0031324,GO:0035303,GO:0035305,GO:0043086,GO:0044092,GO:0044464,GO:0045202,GO:0045936,GO:0048519,GO:0048523,GO:0050789,GO:0050790,GO:0050794,GO:0051174,GO:0051336,GO:0051346,GO:0065007,GO:0065009
GSADVT00005174001	6mA	GO:0003674,GO:0005488,GO:0005515,GO:0005575,GO:0006139,GO:0006351,GO:0006355,GO:0006725,GO:0006807,GO:0007399,GO:0008150,GO:0008152,GO:0008270,GO:0009058,GO:0009059,GO:0009889,GO:0009987,GO:0010468,GO:0010556,GO:0016070,GO:0018130,GO:0019219,GO:0019222,GO:0019438,GO:0031323,GO:0031326,GO:0032502,GO:0032774,GO:0032991,GO:0034641,GO:0034645,GO:0034654,GO:0043167,GO:0043169,GO:0043170,GO:0043234,GO:…
GSADVT00008795001	6mA	GO:0003674,GO:0005488,GO:0005515,GO:0005575,GO:0006355,GO:0006357,GO:0007059,GO:0008150,GO:0008152,GO:0008284,GO:0009058,GO:0009889,GO:0009987,GO:0010468,GO:0010556,GO:0016043,GO:0016226,GO:0019219,GO:0019222,GO:0022607,GO:0031163,GO:0031323,GO:0031326,GO:0032991,GO:0042127,GO:0043234,GO:0044281,GO:0044422,GO:0044424,GO:0044430,GO:0044444,GO:0044445,GO:0044446,GO:0044464,GO:0044699,GO:0044710,GO:…
GSADVT00005882001	6mA	GO:0003674,GO:0005488,GO:0005515,GO:0005575,GO:0007165,GO:0008150,GO:0008287,GO:0019208,GO:0019888,GO:0030234,GO:0030289,GO:0030362,GO:0032991,GO:0043234,GO:0044424,GO:0044464,GO:0050789,GO:0050794,GO:0065007,GO:1902494,GO:1903293
GSADVT00041162001	6mA	GO:0003674,GO:0005488,GO:0005515,GO:0006464,GO:0008150,GO:0008152,GO:0009058,GO:0009987,GO:0017182,GO:0017183,GO:0018193,GO:0018202,GO:0019538,GO:0036211,GO:0043170,GO:0043412,GO:0043687,GO:0044237,GO:0044238,GO:0044249,GO:0044260,GO:0044267,GO:0044699,GO:0044710,GO:0044711,GO:0044763,GO:0061685,GO:0071704
GSADVT00002220001	6mA	GO:0003674,GO:0005488,GO:0005515,GO:0007165,GO:0008150,GO:0050789,GO:0050794,GO:0065007
GSADVT00005961001	6mA	GO:0003674,GO:0005488,GO:0005515,GO:0007165,GO:0008150,GO:0050789,GO:0050794,GO:0065007
GSADVT00010887001	6mA	GO:0003674,GO:0005488,GO:0005515,GO:0007165,GO:0008150,GO:0050789,GO:0050794,GO:0065007
GSADVT00036455001	6mA	GO:0003674,GO:0005488,GO:0005515,GO:0007165,GO:0008150,GO:0050789,GO:0050794,GO:0065007
GSADVT00045690001	6mA	GO:0003674,GO:0005488,GO:0005515,GO:0007165,GO:0008150,GO:0050789,GO:0050794,GO:0065007
GSADVT00002060001	6mA	GO:0003674,GO:0005488,GO:0005515,GO:0008270,GO:0043167,GO:0043169,GO:0046872,GO:0046914
GSADVT00053927001	6mA	GO:0003674,GO:0005488,GO:0005575,GO:0005615,GO:0005634,GO:0005737,GO:0006915,GO:0007155,GO:0007157,GO:0008150,GO:0008219,GO:0009987,GO:0012501,GO:0016265,GO:0022610,GO:0030246,GO:0031982,GO:0031988,GO:0043226,GO:0043227,GO:0043229,GO:0043230,GO:0043231,GO:0044421,GO:0044424,GO:0044464,GO:0044699,GO:0044763,GO:0065010,GO:0070062,GO:0098609,GO:0098742,GO:1903561
GSADVT00000303001	6mA	GO:0003674,GO:0005488,GO:0005575,GO:0005622,GO:0007165,GO:0008150,GO:0035556,GO:0043167,GO:0043169,GO:0044464,GO:0046872,GO:0050789,GO:0050794,GO:0065007
GSADVT00039476001	6mA	GO:0003674,GO:0005488,GO:0005575,GO:0005622,GO:0008270,GO:0043167,GO:0043169,GO:0044464,GO:0046872,GO:0046914
GSADVT00044698001	6mA	GO:0003674,GO:0005488,GO:0005575,GO:0005622,GO:0043167,GO:0043169,GO:0044464,GO:0046872
GSADVT00022648001	6mA	GO:0003674,GO:0005488,GO:0005575,GO:0005794,GO:0006810,GO:0008150,GO:0008289,GO:0043226,GO:0043227,GO:0043229,GO:0043231,GO:0044424,GO:0044444,GO:0044464,GO:0051179,GO:0051234
GSADVT00029166001	6mA	GO:0003674,GO:0005488,GO:0005575,GO:0006139,GO:0006396,GO:0006725,GO:0006807,GO:0008150,GO:0008152,GO:0008270,GO:0009507,GO:0009536,GO:0009987,GO:0016070,GO:0031425,GO:0034641,GO:0043167,GO:0043169,GO:0043170,GO:0043226,GO:0043227,GO:0043229,GO:0043231,GO:0044237,GO:0044238,GO:0044260,GO:0044424,GO:0044444,GO:0044464,GO:0046483,GO:0046872,GO:0046914,GO:0071704,GO:0090304,GO:1901360
GSADVT00012757001	6mA	GO:0003674,GO:0005488,GO:0005575,GO:0008150,GO:0009405,GO:0015643,GO:0016021,GO:0031224,GO:0044425,GO:0051704
GSADVT00017723001	6mA	GO:0003674,GO:0005488,GO:0006810,GO:0006811,GO:0006812,GO:0008150,GO:0030001,GO:0043167,GO:0043169,GO:0044699,GO:0044765,GO:0046872,GO:0051179,GO:0051234,GO:1902578
GSADVT00021100001	6mA	GO:0003674,GO:0005488,GO:0008270,GO:0043167,GO:0043169,GO:0046872,GO:0046914
GSADVT00036941001	6mA	GO:0003674,GO:0005488,GO:0008270,GO:0043167,GO:0043169,GO:0046872,GO:0046914
GSADVT00064879001	6mA	GO:0003674,GO:0005488,GO:0030246
GSADVT00022067001	6mA	GO:0003674,GO:0005488,GO:0043167,GO:0043169,GO:0046872
GSADVT00031754001	6mA	GO:0003674,GO:0007049,GO:0008150,GO:0009987,GO:0016538,GO:0019207,GO:0019887,GO:0030234,GO:0044699,GO:0044763,GO:0051301
GSADVT00006476001	6mA	GO:0005575,GO:0005576
GSADVT00062425001	6mA	GO:0005575,GO:0005576
GSADVT00046815001	6mA	GO:0005575,GO:0005622,GO:0005840,GO:0008150,GO:0022613,GO:0030529,GO:0032991,GO:0042254,GO:0043226,GO:0043228,GO:0043229,GO:0043232,GO:0044085,GO:0044424,GO:0044444,GO:0044464,GO:0071840
GSADVT00006532001	6mA	GO:0005575,GO:0005623,GO:0008150,GO:0009987,GO:0016021,GO:0019725,GO:0031224,GO:0042592,GO:0044425,GO:0044699,GO:0044763,GO:0045454,GO:0050789,GO:0050794,GO:0065007,GO:0065008
GSADVT00000166001	6mA	GO:0005575,GO:0005634,GO:0005681,GO:0006139,GO:0006396,GO:0006397,GO:0006725,GO:0006807,GO:0007399,GO:0008150,GO:0008152,GO:0008380,GO:0009987,GO:0016070,GO:0016071,GO:0030529,GO:0032502,GO:0032991,GO:0034641,GO:0043170,GO:0043226,GO:0043227,GO:0043229,GO:0043231,GO:0044237,GO:0044238,GO:0044260,GO:0044422,GO:0044424,GO:0044428,GO:0044446,GO:0044464,GO:0046483,GO:0048731,GO:0048856,GO:0071013,GO:…
GSADVT00018911001	6mA	GO:0005575,GO:0005634,GO:0005730,GO:0006355,GO:0006357,GO:0008150,GO:0009889,GO:0010468,GO:0010556,GO:0019219,GO:0019222,GO:0031323,GO:0031326,GO:0043226,GO:0043227,GO:0043228,GO:0043229,GO:0043231,GO:0043232,GO:0044422,GO:0044424,GO:0044428,GO:0044446,GO:0044464,GO:0050789,GO:0050794,GO:0051171,GO:0051252,GO:0060255,GO:0065007,GO:0080090,GO:1903506,GO:2000112,GO:2001141
GSADVT00035645001	6mA	GO:0005575,GO:0005634,GO:0005737,GO:0006464,GO:0008150,GO:0008152,GO:0009987,GO:0019538,GO:0032446,GO:0036211,GO:0043170,GO:0043226,GO:0043227,GO:0043229,GO:0043231,GO:0043412,GO:0044237,GO:0044238,GO:0044260,GO:0044267,GO:0044424,GO:0044464,GO:0070647,GO:0071569,GO:0071704,GO:1990564,GO:1990592
GSADVT00033838001	6mA	GO:0005575,GO:0005634,GO:0005737,GO:0043226,GO:0043227,GO:0043229,GO:0043231,GO:0044424,GO:0044464
GSADVT00056747001	6mA	GO:0005575,GO:0005634,GO:0005737,GO:0043226,GO:0043227,GO:0043229,GO:0043231,GO:0044424,GO:0044464
GSADVT00042784001	6mA	GO:0005575,GO:0005634,GO:0005829,GO:0006355,GO:0006457,GO:0006458,GO:0008150,GO:0008152,GO:0009888,GO:0009889,GO:0009890,GO:0009892,GO:0009966,GO:0009968,GO:0009987,GO:0010468,GO:0010556,GO:0010558,GO:0010605,GO:0010629,GO:0010646,GO:0010648,GO:0016272,GO:0019219,GO:0019222,GO:0019538,GO:0023051,GO:0023057,GO:0030111,GO:0030178,GO:0031323,GO:0031324,GO:0031326,GO:0031327,GO:0032502,GO:0032991,GO:…
GSADVT00057603001	6mA	GO:0005575,GO:0005634,GO:0006139,GO:0006325,GO:0006333,GO:0006351,GO:0006355,GO:0006725,GO:0006807,GO:0008150,GO:0008152,GO:0009058,GO:0009059,GO:0009889,GO:0009987,GO:0010468,GO:0010556,GO:0016043,GO:0016070,GO:0016568,GO:0018130,GO:0019219,GO:0019222,GO:0019438,GO:0031323,GO:0031326,GO:0032774,GO:0034641,GO:0034645,GO:0034654,GO:0043170,GO:0043226,GO:0043227,GO:0043229,GO:0043231,GO:0043933,GO:…
GSADVT00010290001	6mA	GO:0005575,GO:0005634,GO:0006355,GO:0008150,GO:0009889,GO:0009891,GO:0009893,GO:0010468,GO:0010556,GO:0010557,GO:0010604,GO:0010628,GO:0019219,GO:0019222,GO:0031323,GO:0031325,GO:0031326,GO:0031328,GO:0043226,GO:0043227,GO:0043229,GO:0043231,GO:0044424,GO:0044464,GO:0045893,GO:0045935,GO:0048518,GO:0048522,GO:0050789,GO:0050794,GO:0051171,GO:0051173,GO:0051252,GO:0051254,GO:0060255,GO:0065007,GO:…
GSADVT00014027001	6mA	GO:0005575,GO:0005634,GO:0007049,GO:0007276,GO:0007283,GO:0008150,GO:0009987,GO:0022414,GO:0030154,GO:0032502,GO:0043226,GO:0043227,GO:0043229,GO:0043231,GO:0044424,GO:0044464,GO:0044699,GO:0044702,GO:0044763,GO:0044767,GO:0048232,GO:0048609,GO:0048869,GO:0051321
GSADVT00000757001	6mA	GO:0005575,GO:0005634,GO:0043226,GO:0043227,GO:0043229,GO:0043231,GO:0044424,GO:0044464
GSADVT00035607001	6mA	GO:0005575,GO:0005654,GO:0005737,GO:0005856,GO:0005886,GO:0005911,GO:0005923,GO:0006139,GO:0006378,GO:0006396,GO:0006397,GO:0006725,GO:0006807,GO:0007155,GO:0008150,GO:0008152,GO:0009893,GO:0009987,GO:0010562,GO:0010604,GO:0016020,GO:0016070,GO:0016071,GO:0019220,GO:0019222,GO:0022610,GO:0030054,GO:0031123,GO:0031124,GO:0031323,GO:0031325,GO:0031399,GO:0031401,GO:0032268,GO:0032270,GO:0034641,GO:…
GSADVT00028293001	6mA	GO:0005575,GO:0005654,GO:0005737,GO:0005856,GO:0015630,GO:0043226,GO:0043228,GO:0043229,GO:0043232,GO:0044422,GO:0044424,GO:0044428,GO:0044446,GO:0044464
GSADVT00018931001	6mA	GO:0005575,GO:0005654,GO:0005829,GO:0005886,GO:0006457,GO:0008150,GO:0008152,GO:0009987,GO:0016020,GO:0019538,GO:0031982,GO:0031988,GO:0043170,GO:0043226,GO:0043227,GO:0043230,GO:0044237,GO:0044238,GO:0044260,GO:0044267,GO:0044421,GO:0044422,GO:0044424,GO:0044428,GO:0044444,GO:0044446,GO:0044464,GO:0065010,GO:0070062,GO:0071704,GO:1903561
GSADVT00029506001	6mA	GO:0005575,GO:0005730,GO:0043226,GO:0043228,GO:0043229,GO:0043232,GO:0044422,GO:0044424,GO:0044428,GO:0044446,GO:0044464
GSADVT00018573001	6mA	GO:0005575,GO:0005737,GO:0005813,GO:0005815,GO:0043226,GO:0043228,GO:0043229,GO:0043232,GO:0044422,GO:0044424,GO:0044430,GO:0044446,GO:0044464
GSADVT00026238001	6mA	GO:0005575,GO:0005737,GO:0005815,GO:0007049,GO:0008150,GO:0009987,GO:0030496,GO:0044422,GO:0044424,GO:0044430,GO:0044446,GO:0044464,GO:0044699,GO:0044763,GO:0051301
GSADVT00026760001	6mA	GO:0005575,GO:0005737,GO:0006996,GO:0007005,GO:0008150,GO:0009987,GO:0016043,GO:0044424,GO:0044464,GO:0044699,GO:0044763,GO:0048311,GO:0048312,GO:0051179,GO:0051640,GO:0051641,GO:0051646,GO:0071840,GO:1902578,GO:1902580,GO:1902589
GSADVT00004405001	6mA	GO:0005575,GO:0005737,GO:0044424,GO:0044464
GSADVT00030000001	6mA	GO:0005575,GO:0005737,GO:0044424,GO:0044464
GSADVT00035946001	6mA	GO:0005575,GO:0005743,GO:0006066,GO:0006067,GO:0008150,GO:0008152,GO:0016020,GO:0016021,GO:0019866,GO:0031090,GO:0031224,GO:0031966,GO:0034308,GO:0044281,GO:0044422,GO:0044424,GO:0044425,GO:0044429,GO:0044444,GO:0044446,GO:0044464,GO:0044699,GO:0044710,GO:0071704,GO:1901615
GSADVT00002633001	6mA	GO:0005575,GO:0005759,GO:0031974,GO:0043233,GO:0044422,GO:0044424,GO:0044429,GO:0044444,GO:0044446,GO:0044464,GO:0070013
GSADVT00005288001	6mA	GO:0005575,GO:0005765,GO:0005774,GO:0006810,GO:0008150,GO:0009987,GO:0016020,GO:0016021,GO:0031090,GO:0031224,GO:0044422,GO:0044424,GO:0044425,GO:0044437,GO:0044444,GO:0044446,GO:0044464,GO:0044699,GO:0044763,GO:0044765,GO:0051179,GO:0051234,GO:0055085,GO:0098588,GO:1902578
GSADVT00029200001	6mA	GO:0005575,GO:0005768,GO:0005769,GO:0005770,GO:0006810,GO:0008104,GO:0008150,GO:0015031,GO:0016020,GO:0033036,GO:0043226,GO:0043227,GO:0043229,GO:0043231,GO:0044424,GO:0044444,GO:0044464,GO:0045184,GO:0051179,GO:0051234,GO:0071702
GSADVT00033505001	6mA	GO:0005575,GO:0005768,GO:0005769,GO:0005886,GO:0006810,GO:0008150,GO:0010008,GO:0016020,GO:0016192,GO:0016197,GO:0031090,GO:0031901,GO:0032991,GO:0042147,GO:0043226,GO:0043227,GO:0043229,GO:0043231,GO:0043234,GO:0044422,GO:0044424,GO:0044440,GO:0044444,GO:0044446,GO:0044464,GO:0044699,GO:0044765,GO:0046907,GO:0051179,GO:0051234,GO:0051649,GO:0071203,GO:0098588,GO:1902578,GO:1902582
GSADVT00000585001	6mA	GO:0005575,GO:0005789,GO:0006810,GO:0006811,GO:0006820,GO:0006835,GO:0006865,GO:0007165,GO:0008150,GO:0008631,GO:0009893,GO:0009966,GO:0009967,GO:0010562,GO:0010604,GO:0010646,GO:0010647,GO:0010917,GO:0010941,GO:0010942,GO:0010950,GO:0010952,GO:0015711,GO:0015800,GO:0015807,GO:0015813,GO:0015849,GO:0016020,GO:0016021,GO:0019220,GO:0019222,GO:0023051,GO:0023056,GO:0030162,GO:0031090,GO:0031224,GO:…
GSADVT00004456001	6mA	GO:0005575,GO:0005789,GO:0006810,GO:0008104,GO:0008150,GO:0015031,GO:0016020,GO:0016021,GO:0031090,GO:0031224,GO:0033036,GO:0044422,GO:0044424,GO:0044425,GO:0044432,GO:0044444,GO:0044446,GO:0044464,GO:0045184,GO:0051179,GO:0051234,GO:0071702,GO:0098588,GO:0098589
GSADVT00020315001	6mA	GO:0005575,GO:0005789,GO:0006810,GO:0008104,GO:0008150,GO:0015031,GO:0016020,GO:0016021,GO:0031090,GO:0031224,GO:0033036,GO:0044422,GO:0044424,GO:0044425,GO:0044432,GO:0044444,GO:0044446,GO:0044464,GO:0045184,GO:0051179,GO:0051234,GO:0071702,GO:0098588,GO:0098589
GSADVT00019329001	6mA	GO:0005575,GO:0005789,GO:0007154,GO:0007267,GO:0008150,GO:0009987,GO:0012505,GO:0016020,GO:0016021,GO:0023052,GO:0031090,GO:0031224,GO:0044422,GO:0044424,GO:0044425,GO:0044432,GO:0044444,GO:0044446,GO:0044464,GO:0044699,GO:0044700,GO:0044763,GO:0045168,GO:0045169,GO:0046331,GO:0098588,GO:0098589
GSADVT00020337001	6mA	GO:0005575,GO:0005789,GO:0016020,GO:0016021,GO:0031090,GO:0031224,GO:0044422,GO:0044424,GO:0044425,GO:0044432,GO:0044444,GO:0044446,GO:0044464,GO:0098588,GO:0098589
GSADVT00005225001	6mA	GO:0005575,GO:0005794,GO:0006996,GO:0007010,GO:0008150,GO:0009987,GO:0016043,GO:0030029,GO:0030036,GO:0030479,GO:0043226,GO:0043227,GO:0043229,GO:0043231,GO:0044422,GO:0044424,GO:0044430,GO:0044444,GO:0044446,GO:0044448,GO:0044464,GO:0044699,GO:0044763,GO:0061645,GO:0071840,GO:1902589
GSADVT00017408001	6mA	GO:0005575,GO:0005794,GO:0006996,GO:0007010,GO:0008150,GO:0009987,GO:0016043,GO:0030029,GO:0030036,GO:0030479,GO:0043226,GO:0043227,GO:0043229,GO:0043231,GO:0044422,GO:0044424,GO:0044430,GO:0044444,GO:0044446,GO:0044448,GO:0044464,GO:0044699,GO:0044763,GO:0061645,GO:0071840,GO:1902589
GSADVT00037408001	6mA	GO:0005575,GO:0005814,GO:0008150,GO:0010564,GO:0010824,GO:0032886,GO:0033043,GO:0043226,GO:0043228,GO:0043229,GO:0043232,GO:0044087,GO:0044422,GO:0044424,GO:0044430,GO:0044444,GO:0044446,GO:0044450,GO:0044464,GO:0046599,GO:0046605,GO:0050789,GO:0050794,GO:0051128,GO:0051493,GO:0051726,GO:0065007,GO:0070507,GO:1902115
GSADVT00033840001	6mA	GO:0005575,GO:0005829,GO:0005856,GO:0005885,GO:0007015,GO:0008064,GO:0008150,GO:0009987,GO:0010638,GO:0015629,GO:0016043,GO:0030832,GO:0030833,GO:0030838,GO:0031334,GO:0032271,GO:0032273,GO:0032535,GO:0032956,GO:0032970,GO:0032991,GO:0033043,GO:0034314,GO:0042995,GO:0043226,GO:0043228,GO:0043229,GO:0043232,GO:0043234,GO:0043254,GO:0043933,GO:0044087,GO:0044089,GO:0044422,GO:0044424,GO:0044430,GO:…
GSADVT00012138001	6mA	GO:0005575,GO:0005856,GO:0005930,GO:0043226,GO:0043228,GO:0043229,GO:0043232,GO:0044422,GO:0044424,GO:0044441,GO:0044444,GO:0044463,GO:0044464
GSADVT00008942001	6mA	GO:0005575,GO:0005865,GO:0006996,GO:0007010,GO:0007015,GO:0008064,GO:0008150,GO:0009987,GO:0010639,GO:0010927,GO:0016043,GO:0022607,GO:0030017,GO:0030018,GO:0030029,GO:0030036,GO:0030239,GO:0030832,GO:0030833,GO:0030837,GO:0031032,GO:0031333,GO:0032271,GO:0032272,GO:0032502,GO:0032535,GO:0032956,GO:0032970,GO:0033043,GO:0036379,GO:0043254,GO:0043933,GO:0044087,GO:0044422,GO:0044424,GO:0044430,GO:…
GSADVT00008339001	6mA	GO:0005575,GO:0005886,GO:0005905,GO:0006461,GO:0006810,GO:0006897,GO:0006898,GO:0006901,GO:0006996,GO:0008150,GO:0009987,GO:0016020,GO:0016043,GO:0016050,GO:0016192,GO:0022607,GO:0034622,GO:0043623,GO:0043933,GO:0044425,GO:0044464,GO:0048268,GO:0051179,GO:0051234,GO:0065003,GO:0071822,GO:0071840,GO:0072583
GSADVT00008219001	6mA	GO:0005575,GO:0005886,GO:0006810,GO:0008150,GO:0009987,GO:0016020,GO:0016021,GO:0031224,GO:0044425,GO:0044464,GO:0044699,GO:0044763,GO:0044765,GO:0051179,GO:0051234,GO:0055085,GO:1902578
GSADVT00035064001	6mA	GO:0005575,GO:0005886,GO:0016020,GO:0016021,GO:0031224,GO:0044425,GO:0044464
GSADVT00040750001	6mA	GO:0005575,GO:0005886,GO:0016020,GO:0016021,GO:0031224,GO:0044425,GO:0044464
GSADVT00001997001	6mA	GO:0005575,GO:0005886,GO:0016020,GO:0044464
GSADVT00039711001	6mA	GO:0005575,GO:0005890,GO:0006810,GO:0006811,GO:0006812,GO:0006813,GO:0006814,GO:0008150,GO:0015672,GO:0030001,GO:0032991,GO:0043234,GO:0044425,GO:0044459,GO:0044464,GO:0044699,GO:0044765,GO:0051179,GO:0051234,GO:0090533,GO:0098533,GO:1902494,GO:1902495,GO:1902578,GO:1990351
GSADVT00001561001	6mA	GO:0005575,GO:0006810,GO:0006811,GO:0008150,GO:0016020,GO:0016021,GO:0031090,GO:0031224,GO:0031965,GO:0044422,GO:0044424,GO:0044425,GO:0044428,GO:0044446,GO:0044464,GO:0044699,GO:0044765,GO:0051179,GO:0051234,GO:1902578
GSADVT00000957001	6mA	GO:0005575,GO:0006810,GO:0006996,GO:0007032,GO:0007033,GO:0007034,GO:0007040,GO:0007041,GO:0008104,GO:0008150,GO:0008333,GO:0009987,GO:0015031,GO:0016043,GO:0016192,GO:0016197,GO:0016482,GO:0032991,GO:0033036,GO:0043234,GO:0044424,GO:0044444,GO:0044464,GO:0044699,GO:0044765,GO:0045022,GO:0045184,GO:0046907,GO:0051179,GO:0051234,GO:0051649,GO:0070695,GO:0071702,GO:0071840,GO:0080171,GO:1902578,GO:…
GSADVT00035675001	6mA	GO:0005575,GO:0006810,GO:0007399,GO:0007610,GO:0007626,GO:0008104,GO:0008150,GO:0015031,GO:0016023,GO:0019898,GO:0030141,GO:0031045,GO:0031410,GO:0031982,GO:0031988,GO:0032502,GO:0033036,GO:0035176,GO:0043226,GO:0043227,GO:0043229,GO:0043231,GO:0044424,GO:0044425,GO:0044444,GO:0044464,GO:0045184,GO:0048731,GO:0048856,GO:0051179,GO:0051234,GO:0051703,GO:0051704,GO:0051705,GO:0071702
GSADVT00004346001	6mA	GO:0005575,GO:0006810,GO:0008104,GO:0008150,GO:0009628,GO:0009987,GO:0015031,GO:0015833,GO:0016020,GO:0016021,GO:0031224,GO:0033036,GO:0042886,GO:0044425,GO:0044699,GO:0044763,GO:0044765,GO:0045184,GO:0050896,GO:0051179,GO:0051234,GO:0055085,GO:0071702,GO:0071705,GO:0080167,GO:1902578
GSADVT00020477001	6mA	GO:0005575,GO:0006810,GO:0008150,GO:0008643,GO:0009987,GO:0016020,GO:0016021,GO:0031224,GO:0034219,GO:0044425,GO:0044699,GO:0044763,GO:0044765,GO:0051179,GO:0051234,GO:0055085,GO:0071702,GO:1902578
GSADVT00013477001	6mA	GO:0005575,GO:0006810,GO:0008150,GO:0009987,GO:0016021,GO:0031224,GO:0044425,GO:0044699,GO:0044763,GO:0044765,GO:0051179,GO:0051234,GO:0055085,GO:1902578
GSADVT00009123001	6mA	GO:0005575,GO:0016020
GSADVT00019514001	6mA	GO:0005575,GO:0016020
GSADVT00045696001	6mA	GO:0005575,GO:0016020
GSADVT00004535001	6mA	GO:0005575,GO:0016021,GO:0031224,GO:0044425
GSADVT00006844001	6mA	GO:0005575,GO:0016021,GO:0031224,GO:0044425
GSADVT00007206001	6mA	GO:0005575,GO:0016021,GO:0031224,GO:0044425
GSADVT00009601001	6mA	GO:0005575,GO:0016021,GO:0031224,GO:0044425
GSADVT00030876001	6mA	GO:0005575,GO:0016021,GO:0031224,GO:0044425
GSADVT00046276001	6mA	GO:0005575,GO:0016021,GO:0031224,GO:0044425
GSADVT00050394001	6mA	GO:0005575,GO:0016021,GO:0031224,GO:0044425
GSADVT00054164001	6mA	GO:0005575,GO:0016021,GO:0031224,GO:0044425
GSADVT00007279001	6mA	GO:0005575,GO:0019028,GO:0044423
GSADVT00050611001	6mA	GO:0006810,GO:0006890,GO:0008150,GO:0016192,GO:0044699,GO:0044765,GO:0046907,GO:0048193,GO:0051179,GO:0051234,GO:0051649,GO:1902578,GO:1902582
GSADVT00026661001	6mA	GO:0006810,GO:0008150,GO:0016192,GO:0051179,GO:0051234
GSADVT00041512001	6mA	GO:0006810,GO:0008150,GO:0016192,GO:0051179,GO:0051234
GSADVT00016797001	6mA	GO:0007346,GO:0008150,GO:0010389,GO:0010564,GO:0010948,GO:0010972,GO:0030334,GO:0030336,GO:0032879,GO:0040012,GO:0040013,GO:0045786,GO:0045930,GO:0048519,GO:0048523,GO:0050789,GO:0050794,GO:0051270,GO:0051271,GO:0051726,GO:0065007,GO:1901987,GO:1901988,GO:1901990,GO:1901991,GO:1902749,GO:1902750,GO:2000145,GO:2000146
GSADVT00010317001	6mA	GO:0008150,GO:0010941,GO:0042981,GO:0043067,GO:0050789,GO:0050794,GO:0065007
GSADVT00000061001	6mA	NA
GSADVT00000065001	6mA	NA
GSADVT00000076001	6mA	NA
GSADVT00000107001	6mA	NA
GSADVT00000169001	6mA	NA
GSADVT00000384001	6mA	NA
GSADVT00000478001	6mA	NA
GSADVT00000581001	6mA	NA
GSADVT00000691001	6mA	NA
GSADVT00000792001	6mA	NA
GSADVT00000822001	6mA	NA
GSADVT00001077001	6mA	NA
GSADVT00001379001	6mA	NA
GSADVT00001398001	6mA	NA
GSADVT00001721001	6mA	NA
GSADVT00001753001	6mA	NA
GSADVT00001802001	6mA	NA
GSADVT00001909001	6mA	NA
GSADVT00002219001	6mA	NA
GSADVT00002414001	6mA	NA
GSADVT00002699001	6mA	NA
GSADVT00002766001	6mA	NA
GSADVT00002801001	6mA	NA
GSADVT00002838001	6mA	NA
GSADVT00002966001	6mA	NA
GSADVT00003133001	6mA	NA
GSADVT00003136001	6mA	NA
GSADVT00003438001	6mA	NA
GSADVT00003640001	6mA	NA
GSADVT00003677001	6mA	NA
GSADVT00003815001	6mA	NA
GSADVT00004011001	6mA	NA
GSADVT00004023001	6mA	NA
GSADVT00004091001	6mA	NA
GSADVT00004310001	6mA	NA
GSADVT00004905001	6mA	NA
GSADVT00004927001	6mA	NA
GSADVT00005175001	6mA	NA
GSADVT00005294001	6mA	NA
GSADVT00005388001	6mA	NA
GSADVT00005431001	6mA	NA
GSADVT00005443001	6mA	NA
GSADVT00005449001	6mA	NA
GSADVT00005575001	6mA	NA
GSADVT00005692001	6mA	NA
GSADVT00006040001	6mA	NA
GSADVT00006100001	6mA	NA
GSADVT00006339001	6mA	NA
GSADVT00006409001	6mA	NA
GSADVT00006590001	6mA	NA
GSADVT00006645001	6mA	NA
GSADVT00006733001	6mA	NA
GSADVT00006770001	6mA	NA
GSADVT00006779001	6mA	NA
GSADVT00006987001	6mA	NA
GSADVT00007128001	6mA	NA
GSADVT00007158001	6mA	NA
GSADVT00007452001	6mA	NA
GSADVT00007460001	6mA	NA
GSADVT00007543001	6mA	NA
GSADVT00007609001	6mA	NA
GSADVT00008027001	6mA	NA
GSADVT00008097001	6mA	NA
GSADVT00008225001	6mA	NA
GSADVT00008448001	6mA	NA
GSADVT00008463001	6mA	NA
GSADVT00008507001	6mA	NA
GSADVT00008923001	6mA	NA
GSADVT00008929001	6mA	NA
GSADVT00008952001	6mA	NA
GSADVT00009168001	6mA	NA
GSADVT00009399001	6mA	NA
GSADVT00009556001	6mA	NA
GSADVT00009617001	6mA	NA
GSADVT00009837001	6mA	NA
GSADVT00010057001	6mA	NA
GSADVT00010096001	6mA	NA
GSADVT00010295001	6mA	NA
GSADVT00010408001	6mA	NA
GSADVT00010546001	6mA	NA
GSADVT00010744001	6mA	NA
GSADVT00010834001	6mA	NA
GSADVT00010841001	6mA	NA
GSADVT00010885001	6mA	NA
GSADVT00011046001	6mA	NA
GSADVT00011170001	6mA	NA
GSADVT00012531001	6mA	NA
GSADVT00012727001	6mA	NA
GSADVT00012736001	6mA	NA
GSADVT00012797001	6mA	NA
GSADVT00012951001	6mA	NA
GSADVT00012953001	6mA	NA
GSADVT00013211001	6mA	NA
GSADVT00013241001	6mA	NA
GSADVT00013807001	6mA	NA
GSADVT00013892001	6mA	NA
GSADVT00013908001	6mA	NA
GSADVT00013965001	6mA	NA
GSADVT00014243001	6mA	NA
GSADVT00014347001	6mA	NA
GSADVT00014410001	6mA	NA
GSADVT00014495001	6mA	NA
GSADVT00014543001	6mA	NA
GSADVT00014571001	6mA	NA
GSADVT00014671001	6mA	NA
GSADVT00014792001	6mA	NA
GSADVT00014818001	6mA	NA
GSADVT00015225001	6mA	NA
GSADVT00015590001	6mA	NA
GSADVT00016043001	6mA	NA
GSADVT00016053001	6mA	NA
GSADVT00016122001	6mA	NA
GSADVT00016209001	6mA	NA
GSADVT00016403001	6mA	NA
GSADVT00016700001	6mA	NA
GSADVT00016818001	6mA	NA
GSADVT00017315001	6mA	NA
GSADVT00017420001	6mA	NA
GSADVT00017584001	6mA	NA
GSADVT00017689001	6mA	NA
GSADVT00018460001	6mA	NA
GSADVT00018548001	6mA	NA
GSADVT00018601001	6mA	NA
GSADVT00019113001	6mA	NA
GSADVT00019148001	6mA	NA
GSADVT00019215001	6mA	NA
GSADVT00019489001	6mA	NA
GSADVT00019586001	6mA	NA
GSADVT00019855001	6mA	NA
GSADVT00020112001	6mA	NA
GSADVT00020213001	6mA	NA
GSADVT00020272001	6mA	NA
GSADVT00020307001	6mA	NA
GSADVT00020339001	6mA	NA
GSADVT00020437001	6mA	NA
GSADVT00020443001	6mA	NA
GSADVT00021339001	6mA	NA
GSADVT00021377001	6mA	NA
GSADVT00021390001	6mA	NA
GSADVT00021733001	6mA	NA
GSADVT00022241001	6mA	NA
GSADVT00022574001	6mA	NA
GSADVT00023014001	6mA	NA
GSADVT00023393001	6mA	NA
GSADVT00023540001	6mA	NA
GSADVT00023616001	6mA	NA
GSADVT00023645001	6mA	NA
GSADVT00025950001	6mA	NA
GSADVT00026024001	6mA	NA
GSADVT00026177001	6mA	NA
GSADVT00026384001	6mA	NA
GSADVT00026395001	6mA	NA
GSADVT00026542001	6mA	NA
GSADVT00026558001	6mA	NA
GSADVT00026565001	6mA	NA
GSADVT00026676001	6mA	NA
GSADVT00026740001	6mA	NA
GSADVT00026925001	6mA	NA
GSADVT00026926001	6mA	NA
GSADVT00026952001	6mA	NA
GSADVT00027033001	6mA	NA
GSADVT00027052001	6mA	NA
GSADVT00027379001	6mA	NA
GSADVT00027424001	6mA	NA
GSADVT00027663001	6mA	NA
GSADVT00028896001	6mA	NA
GSADVT00028917001	6mA	NA
GSADVT00029004001	6mA	NA
GSADVT00029487001	6mA	NA
GSADVT00029522001	6mA	NA
GSADVT00030084001	6mA	NA
GSADVT00030405001	6mA	NA
GSADVT00030529001	6mA	NA
GSADVT00030549001	6mA	NA
GSADVT00030572001	6mA	NA
GSADVT00030803001	6mA	NA
GSADVT00031315001	6mA	NA
GSADVT00031527001	6mA	NA
GSADVT00031749001	6mA	NA
GSADVT00032426001	6mA	NA
GSADVT00032652001	6mA	NA
GSADVT00033147001	6mA	NA
GSADVT00033167001	6mA	NA
GSADVT00033177001	6mA	NA
GSADVT00033903001	6mA	NA
GSADVT00033959001	6mA	NA
GSADVT00034159001	6mA	NA
GSADVT00034694001	6mA	NA
GSADVT00034718001	6mA	NA
GSADVT00035229001	6mA	NA
GSADVT00035835001	6mA	NA
GSADVT00036215001	6mA	NA
GSADVT00037933001	6mA	NA
GSADVT00039307001	6mA	NA
GSADVT00039373001	6mA	NA
GSADVT00039437001	6mA	NA
GSADVT00039713001	6mA	NA
GSADVT00039937001	6mA	NA
GSADVT00040007001	6mA	NA
GSADVT00040137001	6mA	NA
GSADVT00041080001	6mA	NA
GSADVT00041486001	6mA	NA
GSADVT00041601001	6mA	NA
GSADVT00041631001	6mA	NA
GSADVT00041807001	6mA	NA
GSADVT00042431001	6mA	NA
GSADVT00043909001	6mA	NA
GSADVT00044574001	6mA	NA
GSADVT00044601001	6mA	NA
GSADVT00044640001	6mA	NA
GSADVT00045083001	6mA	NA
GSADVT00045241001	6mA	NA
GSADVT00045794001	6mA	NA
GSADVT00046905001	6mA	NA
GSADVT00047598001	6mA	NA
GSADVT00047734001	6mA	NA
GSADVT00048715001	6mA	NA
GSADVT00048765001	6mA	NA
GSADVT00049053001	6mA	NA
GSADVT00049677001	6mA	NA
GSADVT00050422001	6mA	NA
GSADVT00051451001	6mA	NA
GSADVT00051775001	6mA	NA
GSADVT00052363001	6mA	NA
GSADVT00052807001	6mA	NA
GSADVT00053925001	6mA	NA
GSADVT00054071001	6mA	NA
GSADVT00054373001	6mA	NA
GSADVT00054832001	6mA	NA
GSADVT00055035001	6mA	NA
GSADVT00055601001	6mA	NA
GSADVT00055611001	6mA	NA
GSADVT00056598001	6mA	NA
GSADVT00057318001	6mA	NA
GSADVT00058429001	6mA	NA
GSADVT00059097001	6mA	NA
GSADVT00059674001	6mA	NA
GSADVT00059845001	6mA	NA
GSADVT00060323001	6mA	NA
GSADVT00061000001	6mA	NA
GSADVT00061174001	6mA	NA
GSADVT00061304001	6mA	NA
GSADVT00061794001	6mA	NA
GSADVT00063347001	6mA	NA
GSADVT00063434001	6mA	NA
GSADVT00065012001	6mA	NA
GSADVT00065649001	6mA	NA
GSADVT00066653001	6mA	NA

## Sheet: AvL1
g19010.t1	6mA	GO:0001525,GO:0002040,GO:0003674,GO:0005488,GO:0005575,GO:0007155,GO:0008150,GO:0016021,GO:0022610,GO:0031224,GO:0032502,GO:0042734,GO:0043167,GO:0043169,GO:0044425,GO:0044456,GO:0044459,GO:0044464,GO:0044699,GO:0044767,GO:0046872,GO:0048646,GO:0097060,GO:0097458
g51411.t1	6mA	GO:0000012,GO:0000122,GO:0000166,GO:0000183,GO:0000302,GO:0000720,GO:0000731,GO:0000785,GO:0000790,GO:0000791,GO:0000792,GO:0000975,GO:0000976,GO:0000988,GO:0000989,GO:0001046,GO:0001047,GO:0001067,GO:0001525,GO:0001542,GO:0001558,GO:0001666,GO:0001678,GO:0001932,GO:0001933,GO:0001934,GO:0001936,GO:0001938,GO:0002039,GO:0002682,GO:0002684,GO:0002819,GO:0002821,GO:0003674,GO:0003676,GO:0003677,GO:…
g72410.t1	6mA	GO:0000014,GO:0000075,GO:0000077,GO:0000082,GO:0000280,GO:0000724,GO:0000725,GO:0000729,GO:0000738,GO:0000988,GO:0000989,GO:0001076,GO:0001104,GO:0001106,GO:0001191,GO:0001835,GO:0003674,GO:0003676,GO:0003677,GO:0003684,GO:0003712,GO:0003714,GO:0003824,GO:0004518,GO:0004519,GO:0004520,GO:0004536,GO:0005488,GO:0005575,GO:0005730,GO:0006139,GO:0006259,GO:0006281,GO:0006289,GO:0006302,GO:0006308,GO:…
g48871.t1	6mA	GO:0000018,GO:0000019,GO:0000075,GO:0000166,GO:0000712,GO:0000795,GO:0000819,GO:0001882,GO:0001883,GO:0003674,GO:0003676,GO:0003677,GO:0003824,GO:0003916,GO:0003918,GO:0005488,GO:0005524,GO:0005575,GO:0005634,GO:0006139,GO:0006259,GO:0006265,GO:0006268,GO:0006271,GO:0006275,GO:0006310,GO:0006325,GO:0006333,GO:0006338,GO:0006725,GO:0006807,GO:0006996,GO:0007059,GO:0007093,GO:0007131,GO:0007346,GO:…
g41522.t1	6mA	GO:0000022,GO:0000166,GO:0000226,GO:0000502,GO:0001882,GO:0001883,GO:0003674,GO:0003824,GO:0005488,GO:0005515,GO:0005524,GO:0005575,GO:0005838,GO:0006355,GO:0006357,GO:0006461,GO:0006508,GO:0006511,GO:0006950,GO:0006974,GO:0006996,GO:0007010,GO:0007017,GO:0007051,GO:0007052,GO:0008134,GO:0008150,GO:0008152,GO:0008283,GO:0008540,GO:0009056,GO:0009057,GO:0009889,GO:0009891,GO:0009893,GO:0009894,GO:…
g66086.t1	6mA	GO:0000022,GO:0000226,GO:0000463,GO:0000470,GO:0002181,GO:0003674,GO:0003676,GO:0003723,GO:0003735,GO:0005198,GO:0005488,GO:0005575,GO:0005840,GO:0006139,GO:0006364,GO:0006412,GO:0006725,GO:0006807,GO:0006996,GO:0007010,GO:0007017,GO:0007051,GO:0007052,GO:0008150,GO:0008152,GO:0009058,GO:0009059,GO:0009987,GO:0015934,GO:0016043,GO:0016070,GO:0016072,GO:0019538,GO:0022402,GO:0022625,GO:0030529,GO:…
g64939.t1	6mA	GO:0000022,GO:0000910,GO:0000922,GO:0003674,GO:0005488,GO:0005515,GO:0005575,GO:0005634,GO:0005654,GO:0005737,GO:0005819,GO:0005829,GO:0005856,GO:0005874,GO:0005876,GO:0005886,GO:0007017,GO:0007165,GO:0007264,GO:0008092,GO:0008150,GO:0008284,GO:0009987,GO:0015630,GO:0016020,GO:0019894,GO:0019899,GO:0019900,GO:0019901,GO:0022402,GO:0030496,GO:0032991,GO:0035556,GO:0042127,GO:0042802,GO:0043226,GO:…
g54711.t1	6mA	GO:0000028,GO:0000184,GO:0000956,GO:0003674,GO:0003676,GO:0003723,GO:0003729,GO:0003735,GO:0005198,GO:0005488,GO:0005575,GO:0005829,GO:0005912,GO:0005924,GO:0005925,GO:0006139,GO:0006401,GO:0006402,GO:0006412,GO:0006413,GO:0006414,GO:0006415,GO:0006417,GO:0006448,GO:0006450,GO:0006605,GO:0006612,GO:0006613,GO:0006614,GO:0006725,GO:0006807,GO:0006810,GO:0006886,GO:0008104,GO:0008150,GO:0008152,GO:…
g71502.t1	6mA	GO:0000030,GO:0003674,GO:0003824,GO:0005488,GO:0005537,GO:0005575,GO:0005794,GO:0005975,GO:0006629,GO:0006643,GO:0006644,GO:0006664,GO:0006665,GO:0006673,GO:0006675,GO:0006687,GO:0006688,GO:0006793,GO:0006796,GO:0006807,GO:0006810,GO:0006886,GO:0006897,GO:0007034,GO:0007038,GO:0008104,GO:0008150,GO:0008152,GO:0008610,GO:0008654,GO:0009058,GO:0009247,GO:0009987,GO:0015031,GO:0016020,GO:0016021,GO:…
g73792.t1	6mA	GO:0000041,GO:0000166,GO:0001882,GO:0001883,GO:0003674,GO:0003824,GO:0003924,GO:0005215,GO:0005381,GO:0005488,GO:0005525,GO:0005575,GO:0005783,GO:0005829,GO:0006810,GO:0006811,GO:0006812,GO:0006826,GO:0006913,GO:0008104,GO:0008150,GO:0008324,GO:0015030,GO:0015031,GO:0015075,GO:0015093,GO:0015684,GO:0016021,GO:0016462,GO:0016482,GO:0016604,GO:0016787,GO:0016817,GO:0016818,GO:0017076,GO:0017111,GO:…
g38032.t1	6mA	GO:0000041,GO:0000166,GO:0001882,GO:0001883,GO:0003674,GO:0003824,GO:0004008,GO:0005215,GO:0005375,GO:0005488,GO:0005507,GO:0005524,GO:0005575,GO:0005768,GO:0005770,GO:0005802,GO:0005887,GO:0005911,GO:0005923,GO:0006810,GO:0006811,GO:0006812,GO:0006825,GO:0006873,GO:0006875,GO:0006878,GO:0006882,GO:0007589,GO:0007595,GO:0007623,GO:0008150,GO:0008270,GO:0008324,GO:0009719,GO:0009987,GO:0010033,GO:…
g39756.t1	6mA	GO:0000041,GO:0001775,GO:0003674,GO:0005215,GO:0005216,GO:0005261,GO:0005262,GO:0005575,GO:0005635,GO:0005801,GO:0005829,GO:0005886,GO:0005887,GO:0006810,GO:0006811,GO:0006812,GO:0006816,GO:0006828,GO:0006873,GO:0006874,GO:0006875,GO:0006928,GO:0007338,GO:0007411,GO:0007596,GO:0007599,GO:0008150,GO:0008324,GO:0009566,GO:0009987,GO:0015075,GO:0015085,GO:0015267,GO:0015276,GO:0015279,GO:0016020,GO:…
g59247.t1	6mA	GO:0000041,GO:0003674,GO:0005215,GO:0005216,GO:0005261,GO:0005262,GO:0005575,GO:0005829,GO:0005887,GO:0006810,GO:0006811,GO:0006812,GO:0006816,GO:0006828,GO:0006873,GO:0006874,GO:0006875,GO:0008150,GO:0008324,GO:0009314,GO:0009416,GO:0009581,GO:0009582,GO:0009583,GO:0009584,GO:0009605,GO:0009628,GO:0009987,GO:0015075,GO:0015085,GO:0015267,GO:0015276,GO:0015279,GO:0016021,GO:0016028,GO:0019725,GO:…
g63056.t1	6mA	GO:0000041,GO:0003674,GO:0005215,GO:0005381,GO:0005385,GO:0005575,GO:0005783,GO:0005794,GO:0005886,GO:0005887,GO:0006810,GO:0006811,GO:0006812,GO:0006826,GO:0006829,GO:0006873,GO:0006875,GO:0006882,GO:0008150,GO:0008324,GO:0009987,GO:0015075,GO:0015093,GO:0015684,GO:0016020,GO:0016021,GO:0019725,GO:0022857,GO:0022890,GO:0022891,GO:0022892,GO:0030001,GO:0030003,GO:0031224,GO:0031226,GO:0034220,GO:…
g32240.t1	6mA	GO:0000041,GO:0003674,GO:0005215,GO:0005385,GO:0005575,GO:0005634,GO:0005737,GO:0005794,GO:0005886,GO:0006810,GO:0006811,GO:0006812,GO:0006829,GO:0008150,GO:0008324,GO:0009987,GO:0015075,GO:0016020,GO:0016021,GO:0022857,GO:0022890,GO:0022891,GO:0022892,GO:0030001,GO:0031224,GO:0034220,GO:0043226,GO:0043227,GO:0043229,GO:0043231,GO:0044424,GO:0044425,GO:0044444,GO:0044464,GO:0044699,GO:0044763,GO:…
g67890.t1	6mA	GO:0000041,GO:0003674,GO:0005215,GO:0005385,GO:0005575,GO:0005886,GO:0006810,GO:0006811,GO:0006812,GO:0006828,GO:0006829,GO:0008150,GO:0008324,GO:0009987,GO:0010035,GO:0010038,GO:0010043,GO:0015075,GO:0016020,GO:0016021,GO:0022857,GO:0022890,GO:0022891,GO:0022892,GO:0030001,GO:0031224,GO:0032844,GO:0032879,GO:0034220,GO:0042221,GO:0044425,GO:0044464,GO:0044699,GO:0044763,GO:0044765,GO:0046873,GO:…
g55190.t1	6mA	GO:0000041,GO:0003674,GO:0005488,GO:0005507,GO:0005575,GO:0005737,GO:0006810,GO:0006811,GO:0006812,GO:0006825,GO:0008150,GO:0030001,GO:0043167,GO:0043169,GO:0044424,GO:0044464,GO:0044699,GO:0044765,GO:0046872,GO:0046914,GO:0051179,GO:0051234,GO:1902578
g45960.t1	6mA	GO:0000045,GO:0000422,GO:0003674,GO:0005488,GO:0005515,GO:0005543,GO:0005575,GO:0005829,GO:0006464,GO:0006497,GO:0006914,GO:0006996,GO:0007005,GO:0007033,GO:0008104,GO:0008150,GO:0008152,GO:0008289,GO:0009056,GO:0009987,GO:0016020,GO:0016043,GO:0019538,GO:0019898,GO:0022411,GO:0022607,GO:0031090,GO:0032266,GO:0033036,GO:0034045,GO:0034497,GO:0034613,GO:0035091,GO:0036211,GO:0043167,GO:0043168,GO:…
g11714.t1	6mA	GO:0000049,GO:0000166,GO:0001510,GO:0002097,GO:0002098,GO:0003674,GO:0003676,GO:0003723,GO:0003824,GO:0005488,GO:0005506,GO:0005575,GO:0005634,GO:0005654,GO:0005829,GO:0005856,GO:0006139,GO:0006399,GO:0006400,GO:0006725,GO:0006807,GO:0006950,GO:0006974,GO:0008033,GO:0008150,GO:0008152,GO:0008168,GO:0008173,GO:0008175,GO:0008270,GO:0009451,GO:0009987,GO:0015630,GO:0016070,GO:0016300,GO:0016491,GO:…
g47643.t1	6mA	GO:0000049,GO:0000166,GO:0001882,GO:0001883,GO:0003674,GO:0003676,GO:0003723,GO:0003746,GO:0003824,GO:0003924,GO:0005488,GO:0005525,GO:0005575,GO:0005615,GO:0005622,GO:0005730,GO:0005856,GO:0008135,GO:0008150,GO:0009719,GO:0009987,GO:0010033,GO:0016462,GO:0016787,GO:0016817,GO:0016818,GO:0017076,GO:0017111,GO:0019001,GO:0030863,GO:0030864,GO:0031253,GO:0031256,GO:0031982,GO:0031988,GO:0032549,GO:…
g65977.t1	6mA	GO:0000049,GO:0001510,GO:0003008,GO:0003674,GO:0003676,GO:0003723,GO:0003824,GO:0005488,GO:0005575,GO:0005634,GO:0005730,GO:0005737,GO:0006139,GO:0006399,GO:0006400,GO:0006725,GO:0006807,GO:0007610,GO:0007611,GO:0007613,GO:0007614,GO:0008033,GO:0008150,GO:0008152,GO:0008168,GO:0008173,GO:0008175,GO:0008757,GO:0009451,GO:0009987,GO:0016070,GO:0016427,GO:0016428,GO:0016740,GO:0016741,GO:0030488,GO:…
g44482.t1	6mA	GO:0000049,GO:0003674,GO:0003676,GO:0003723,GO:0003824,GO:0005488,GO:0005506,GO:0005515,GO:0005575,GO:0005737,GO:0006139,GO:0006399,GO:0006400,GO:0006725,GO:0006807,GO:0008033,GO:0008150,GO:0008152,GO:0009058,GO:0009451,GO:0009987,GO:0010467,GO:0016070,GO:0016491,GO:0016705,GO:0016706,GO:0031590,GO:0031591,GO:0034470,GO:0034641,GO:0034660,GO:0042802,GO:0042803,GO:0043167,GO:0043169,GO:0043170,GO:…
g22118.t1	6mA	GO:0000062,GO:0000139,GO:0003674,GO:0005488,GO:0005515,GO:0005575,GO:0005739,GO:0005794,GO:0006629,GO:0006694,GO:0006810,GO:0008150,GO:0008152,GO:0008202,GO:0008610,GO:0009058,GO:0016020,GO:0016021,GO:0031090,GO:0031224,GO:0034237,GO:0043167,GO:0043168,GO:0043226,GO:0043227,GO:0043229,GO:0043231,GO:0044238,GO:0044422,GO:0044424,GO:0044425,GO:0044431,GO:0044444,GO:0044446,GO:0044464,GO:0044699,GO:…
g65733.t1	6mA	GO:0000062,GO:0000166,GO:0003674,GO:0003824,GO:0003995,GO:0004466,GO:0005488,GO:0005575,GO:0005634,GO:0005739,GO:0005777,GO:0006082,GO:0006629,GO:0006631,GO:0006635,GO:0008150,GO:0008152,GO:0009055,GO:0009056,GO:0009062,GO:0009987,GO:0016020,GO:0016042,GO:0016054,GO:0016491,GO:0016627,GO:0017099,GO:0019395,GO:0019752,GO:0030258,GO:0031090,GO:0031966,GO:0032787,GO:0033539,GO:0034440,GO:0036094,GO:…
g3004.t1	6mA	GO:0000062,GO:0000166,GO:0003674,GO:0003824,GO:0003995,GO:0005488,GO:0005575,GO:0005739,GO:0006082,GO:0006520,GO:0006573,GO:0006574,GO:0006629,GO:0006631,GO:0006635,GO:0006807,GO:0008150,GO:0008152,GO:0009055,GO:0009056,GO:0009062,GO:0009063,GO:0009081,GO:0009083,GO:0009987,GO:0016042,GO:0016054,GO:0016491,GO:0016627,GO:0019395,GO:0019752,GO:0030258,GO:0032787,GO:0033539,GO:0034440,GO:0036094,GO:…
g21506.t1	6mA	GO:0000062,GO:0003674,GO:0005488,GO:0005575,GO:0005783,GO:0005794,GO:0006810,GO:0008150,GO:0008289,GO:0043167,GO:0043168,GO:0043226,GO:0043227,GO:0043229,GO:0043231,GO:0044424,GO:0044444,GO:0044464,GO:0048037,GO:0050662,GO:0051179,GO:0051234,GO:1901681
g27965.t1	6mA	GO:0000070,GO:0000075,GO:0000077,GO:0000079,GO:0000086,GO:0000122,GO:0000166,GO:0000226,GO:0000280,GO:0000281,GO:0000775,GO:0000776,GO:0000779,GO:0000780,GO:0000785,GO:0000795,GO:0000819,GO:0000910,GO:0000922,GO:0000940,GO:0000942,GO:0001578,GO:0001882,GO:0001883,GO:0001932,GO:0001933,GO:0001934,GO:0003674,GO:0003824,GO:0004672,GO:0004674,GO:0005488,GO:0005515,GO:0005524,GO:0005575,GO:0005634,GO:…
g53560.t1	6mA	GO:0000070,GO:0000075,GO:0000077,GO:0000166,GO:0000182,GO:0000217,GO:0000226,GO:0000280,GO:0000400,GO:0000712,GO:0000819,GO:0001882,GO:0001883,GO:0003674,GO:0003676,GO:0003677,GO:0003682,GO:0003696,GO:0003723,GO:0003729,GO:0003824,GO:0003916,GO:0003918,GO:0005488,GO:0005524,GO:0005575,GO:0005634,GO:0005694,GO:0006139,GO:0006259,GO:0006265,GO:0006323,GO:0006342,GO:0006355,GO:0006725,GO:0006807,GO:…
g29836.t1	6mA	GO:0000075,GO:0000076,GO:0000077,GO:0000165,GO:0000166,GO:0000187,GO:0000578,GO:0000793,GO:0001667,GO:0001882,GO:0001883,GO:0001932,GO:0001934,GO:0002376,GO:0003674,GO:0003824,GO:0004672,GO:0004674,GO:0004702,GO:0004708,GO:0004712,GO:0004713,GO:0004871,GO:0005057,GO:0005488,GO:0005524,GO:0005575,GO:0005694,GO:0005737,GO:0006464,GO:0006468,GO:0006793,GO:0006796,GO:0006928,GO:0006950,GO:0006974,GO:…
g14300.t1	6mA	GO:0000075,GO:0000076,GO:0000166,GO:0000781,GO:0000784,GO:0003674,GO:0003676,GO:0003677,GO:0003824,GO:0003887,GO:0004518,GO:0004527,GO:0005488,GO:0005575,GO:0005634,GO:0005657,GO:0006139,GO:0006259,GO:0006260,GO:0006270,GO:0006279,GO:0006355,GO:0006725,GO:0006807,GO:0007093,GO:0007346,GO:0008150,GO:0008152,GO:0008270,GO:0008408,GO:0009058,GO:0009059,GO:0009889,GO:0009987,GO:0010389,GO:0010468,GO:…
g56543.t1	6mA	GO:0000075,GO:0000077,GO:0000280,GO:0000428,GO:0001192,GO:0001193,GO:0003674,GO:0003676,GO:0003677,GO:0003824,GO:0003899,GO:0005488,GO:0005575,GO:0005634,GO:0005665,GO:0005730,GO:0006139,GO:0006259,GO:0006281,GO:0006283,GO:0006289,GO:0006351,GO:0006352,GO:0006366,GO:0006367,GO:0006725,GO:0006807,GO:0006950,GO:0006974,GO:0006996,GO:0007067,GO:0007093,GO:0007095,GO:0007346,GO:0008150,GO:0008152,GO:…
g40541.t1	6mA	GO:0000075,GO:0000077,GO:0002039,GO:0002230,GO:0002682,GO:0002697,GO:0002831,GO:0003674,GO:0003824,GO:0004842,GO:0005488,GO:0005515,GO:0005575,GO:0005634,GO:0005654,GO:0005737,GO:0006139,GO:0006259,GO:0006281,GO:0006464,GO:0006725,GO:0006807,GO:0006950,GO:0006974,GO:0007093,GO:0007346,GO:0008150,GO:0008152,GO:0008270,GO:0009314,GO:0009628,GO:0009987,GO:0010212,GO:0010564,GO:0010948,GO:0016567,GO:…
g56696.t1	6mA	GO:0000075,GO:0000077,GO:0002039,GO:0002230,GO:0002682,GO:0002697,GO:0002831,GO:0003674,GO:0003824,GO:0004842,GO:0005488,GO:0005515,GO:0005575,GO:0005634,GO:0005654,GO:0005737,GO:0006139,GO:0006259,GO:0006281,GO:0006464,GO:0006725,GO:0006807,GO:0006950,GO:0006974,GO:0007093,GO:0007346,GO:0008150,GO:0008152,GO:0008270,GO:0009314,GO:0009628,GO:0009987,GO:0010212,GO:0010564,GO:0010948,GO:0016567,GO:…
g59570.t1	6mA	GO:0000075,GO:0000077,GO:0003674,GO:0003824,GO:0004843,GO:0005575,GO:0005634,GO:0005654,GO:0005730,GO:0005737,GO:0006139,GO:0006259,GO:0006281,GO:0006464,GO:0006508,GO:0006511,GO:0006725,GO:0006807,GO:0006950,GO:0006974,GO:0007165,GO:0008150,GO:0008152,GO:0008233,GO:0008234,GO:0008283,GO:0008630,GO:0009056,GO:0009057,GO:0009314,GO:0009411,GO:0009416,GO:0009628,GO:0009987,GO:0010212,GO:0016579,GO:…
g4198.t1	6mA	GO:0000075,GO:0000900,GO:0000975,GO:0001067,GO:0001071,GO:0003674,GO:0003676,GO:0003677,GO:0003690,GO:0003691,GO:0003697,GO:0003700,GO:0003723,GO:0005488,GO:0005515,GO:0005575,GO:0005634,GO:0005662,GO:0005737,GO:0006139,GO:0006268,GO:0006351,GO:0006355,GO:0006417,GO:0006725,GO:0006807,GO:0006915,GO:0006996,GO:0007093,GO:0007346,GO:0007399,GO:0008134,GO:0008150,GO:0008152,GO:0008219,GO:0008283,GO:…
g29980.t1	6mA	GO:0000079,GO:0000082,GO:0000122,GO:0000165,GO:0000186,GO:0000209,GO:0000278,GO:0000502,GO:0001558,GO:0001932,GO:0001934,GO:0002218,GO:0002220,GO:0002223,GO:0002253,GO:0002376,GO:0002429,GO:0002474,GO:0002478,GO:0002479,GO:0002682,GO:0002684,GO:0002757,GO:0002758,GO:0002764,GO:0002768,GO:0003674,GO:0005488,GO:0005515,GO:0005575,GO:0005634,GO:0005654,GO:0005737,GO:0005829,GO:0005838,GO:0005856,GO:…
g33817.t1	6mA	GO:0000079,GO:0000166,GO:0001882,GO:0001883,GO:0001932,GO:0001934,GO:0003674,GO:0003824,GO:0004672,GO:0004674,GO:0005488,GO:0005524,GO:0005575,GO:0005634,GO:0005737,GO:0005886,GO:0006022,GO:0006355,GO:0006464,GO:0006468,GO:0006793,GO:0006796,GO:0006807,GO:0006915,GO:0007049,GO:0007165,GO:0007346,GO:0008150,GO:0008152,GO:0008219,GO:0008283,GO:0009889,GO:0009893,GO:0009987,GO:0010468,GO:0010556,GO:…
g59254.t1	6mA	GO:0000079,GO:0001932,GO:0003674,GO:0005488,GO:0005515,GO:0005575,GO:0008150,GO:0016021,GO:0019220,GO:0019222,GO:0019899,GO:0019900,GO:0019901,GO:0031224,GO:0031323,GO:0031399,GO:0032268,GO:0042325,GO:0043549,GO:0044425,GO:0045859,GO:0050789,GO:0050790,GO:0050794,GO:0051174,GO:0051246,GO:0051338,GO:0051726,GO:0060255,GO:0065007,GO:0065009,GO:0071900,GO:0080090
g54137.t1	6mA	GO:0000082,GO:0000166,GO:0000278,GO:0000722,GO:0000723,GO:0000731,GO:0003674,GO:0003676,GO:0003677,GO:0003682,GO:0003824,GO:0003887,GO:0004518,GO:0004527,GO:0005488,GO:0005575,GO:0005634,GO:0005654,GO:0005886,GO:0006139,GO:0006259,GO:0006260,GO:0006270,GO:0006287,GO:0006297,GO:0006310,GO:0006312,GO:0006725,GO:0006807,GO:0006996,GO:0007049,GO:0008150,GO:0008152,GO:0008270,GO:0008408,GO:0008622,GO:…
g13282.t1	6mA	GO:0000082,GO:0000932,GO:0003674,GO:0003676,GO:0003723,GO:0003824,GO:0004842,GO:0005488,GO:0005515,GO:0005575,GO:0006139,GO:0006417,GO:0006464,GO:0006725,GO:0006807,GO:0007165,GO:0007166,GO:0007167,GO:0007169,GO:0008150,GO:0008152,GO:0008270,GO:0008283,GO:0008543,GO:0009653,GO:0009888,GO:0009889,GO:0009890,GO:0009892,GO:0009987,GO:0010171,GO:0010172,GO:0010468,GO:0010556,GO:0010558,GO:0010586,GO:…
g9568.t1	6mA	GO:0000082,GO:0000932,GO:0003674,GO:0003676,GO:0003723,GO:0003824,GO:0004842,GO:0005488,GO:0005515,GO:0005575,GO:0006139,GO:0006417,GO:0006464,GO:0006725,GO:0006807,GO:0007165,GO:0007166,GO:0007167,GO:0007169,GO:0008150,GO:0008152,GO:0008270,GO:0008283,GO:0008543,GO:0009653,GO:0009888,GO:0009889,GO:0009890,GO:0009892,GO:0009987,GO:0010171,GO:0010172,GO:0010468,GO:0010556,GO:0010558,GO:0010586,GO:…
g52600.t1	6mA	GO:0000082,GO:0000932,GO:0003674,GO:0003676,GO:0003723,GO:0003824,GO:0004842,GO:0005488,GO:0005515,GO:0005575,GO:0006139,GO:0006417,GO:0006464,GO:0006725,GO:0006807,GO:0007165,GO:0007166,GO:0007167,GO:0007169,GO:0008150,GO:0008152,GO:0008270,GO:0008283,GO:0008543,GO:0009888,GO:0009889,GO:0009890,GO:0009892,GO:0009987,GO:0010468,GO:0010556,GO:0010558,GO:0010586,GO:0010605,GO:0010608,GO:0010629,GO:…
g33.t1	6mA	GO:0000082,GO:0001678,GO:0001975,GO:0002791,GO:0002792,GO:0003008,GO:0003012,GO:0003299,GO:0003300,GO:0003674,GO:0003824,GO:0004721,GO:0004722,GO:0004723,GO:0005488,GO:0005515,GO:0005516,GO:0005575,GO:0005634,GO:0005739,GO:0005829,GO:0005886,GO:0005955,GO:0006355,GO:0006357,GO:0006464,GO:0006470,GO:0006606,GO:0006793,GO:0006796,GO:0006810,GO:0006811,GO:0006812,GO:0006816,GO:0006886,GO:0006913,GO:…
g40103.t1	6mA	GO:0000086,GO:0000166,GO:0001882,GO:0001883,GO:0002376,GO:0002428,GO:0002474,GO:0002475,GO:0002476,GO:0002477,GO:0002478,GO:0002481,GO:0002483,GO:0002484,GO:0002485,GO:0002488,GO:0002489,GO:0002577,GO:0002579,GO:0002583,GO:0002585,GO:0002589,GO:0002591,GO:0002682,GO:0002684,GO:0003674,GO:0003824,GO:0005215,GO:0005488,GO:0005524,GO:0005575,GO:0005886,GO:0005911,GO:0006810,GO:0008150,GO:0008283,GO:…
g15950.t1	6mA	GO:0000096,GO:0000097,GO:0003674,GO:0003824,GO:0004497,GO:0005488,GO:0005506,GO:0005575,GO:0006082,GO:0006355,GO:0006520,GO:0006534,GO:0006725,GO:0006778,GO:0006779,GO:0006790,GO:0006807,GO:0008150,GO:0008152,GO:0008652,GO:0009058,GO:0009069,GO:0009070,GO:0009072,GO:0009073,GO:0009528,GO:0009535,GO:0009653,GO:0009706,GO:0009887,GO:0009889,GO:0009891,GO:0009893,GO:0009965,GO:0009987,GO:0010277,GO:…
g22270.t1	6mA	GO:0000096,GO:0003674,GO:0003824,GO:0004180,GO:0005488,GO:0005575,GO:0005654,GO:0005737,GO:0005829,GO:0006082,GO:0006518,GO:0006520,GO:0006575,GO:0006749,GO:0006750,GO:0006790,GO:0006805,GO:0006807,GO:0008150,GO:0008152,GO:0008233,GO:0008237,GO:0008238,GO:0009058,GO:0009987,GO:0016787,GO:0016805,GO:0019184,GO:0019752,GO:0031982,GO:0031988,GO:0034641,GO:0034701,GO:0042398,GO:0043043,GO:0043167,GO:…
g45052.t1	6mA	GO:0000099,GO:0000101,GO:0002376,GO:0003333,GO:0003674,GO:0003823,GO:0005215,GO:0005342,GO:0005488,GO:0005575,GO:0005886,GO:0005887,GO:0006461,GO:0006810,GO:0006811,GO:0006820,GO:0006865,GO:0006928,GO:0007596,GO:0007599,GO:0008150,GO:0008509,GO:0008514,GO:0009987,GO:0015075,GO:0015171,GO:0015175,GO:0015179,GO:0015184,GO:0015291,GO:0015297,GO:0015711,GO:0015804,GO:0015807,GO:0015811,GO:0015849,GO:…
g52951.t1	6mA	GO:0000103,GO:0000166,GO:0001882,GO:0001883,GO:0003674,GO:0003824,GO:0004020,GO:0004779,GO:0004781,GO:0005488,GO:0005524,GO:0006082,GO:0006139,GO:0006163,GO:0006164,GO:0006725,GO:0006753,GO:0006790,GO:0006793,GO:0006796,GO:0006807,GO:0007596,GO:0007599,GO:0008150,GO:0008152,GO:0009058,GO:0009116,GO:0009117,GO:0009119,GO:0009150,GO:0009152,GO:0009163,GO:0009165,GO:0009259,GO:0009260,GO:0009987,GO:…
g53526.t1	6mA	GO:0000118,GO:0000122,GO:0000166,GO:0000785,GO:0000790,GO:0000792,GO:0000975,GO:0000976,GO:0000977,GO:0000978,GO:0000980,GO:0000987,GO:0001012,GO:0001067,GO:0001158,GO:0001159,GO:0003674,GO:0003676,GO:0003677,GO:0003682,GO:0003723,GO:0003729,GO:0005488,GO:0005515,GO:0005575,GO:0005634,GO:0005737,GO:0006139,GO:0006325,GO:0006338,GO:0006342,GO:0006346,GO:0006351,GO:0006355,GO:0006357,GO:0006461,GO:…
g43452.t1	6mA	GO:0000118,GO:0003674,GO:0003824,GO:0004407,GO:0005488,GO:0005575,GO:0005634,GO:0005737,GO:0006139,GO:0006351,GO:0006355,GO:0006725,GO:0006807,GO:0008150,GO:0008152,GO:0009058,GO:0009059,GO:0009889,GO:0009987,GO:0010468,GO:0010556,GO:0010830,GO:0016070,GO:0016787,GO:0016810,GO:0016811,GO:0017136,GO:0018130,GO:0019213,GO:0019219,GO:0019222,GO:0019438,GO:0031078,GO:0031323,GO:0031326,GO:0032041,GO:…
g36830.t1	6mA	GO:0000122,GO:0000123,GO:0000975,GO:0000988,GO:0000989,GO:0001067,GO:0001071,GO:0001932,GO:0001933,GO:0003674,GO:0003676,GO:0003677,GO:0003700,GO:0003712,GO:0003713,GO:0003824,GO:0004518,GO:0004519,GO:0004520,GO:0004536,GO:0005102,GO:0005488,GO:0005515,GO:0005575,GO:0005634,GO:0005654,GO:0005667,GO:0005669,GO:0005737,GO:0005794,GO:0006139,GO:0006259,GO:0006260,GO:0006281,GO:0006351,GO:0006352,GO:…
g57772.t1	6mA	GO:0000122,GO:0000139,GO:0000902,GO:0000904,GO:0000975,GO:0000988,GO:0000989,GO:0001047,GO:0001067,GO:0001071,GO:0001076,GO:0001190,GO:0001525,GO:0001570,GO:0001669,GO:0001701,GO:0001708,GO:0001726,GO:0001763,GO:0001837,GO:0001889,GO:0001947,GO:0002009,GO:0002011,GO:0002040,GO:0002051,GO:0002052,GO:0002064,GO:0002065,GO:0002067,GO:0002193,GO:0002237,GO:0002376,GO:0002437,GO:0002682,GO:0002683,GO:…
g49447.t1	6mA	GO:0000122,GO:0000785,GO:0000993,GO:0001098,GO:0001099,GO:0001711,GO:0001826,GO:0001829,GO:0001832,GO:0002237,GO:0002682,GO:0002683,GO:0003674,GO:0005488,GO:0005515,GO:0005575,GO:0006139,GO:0006325,GO:0006351,GO:0006355,GO:0006357,GO:0006464,GO:0006479,GO:0006513,GO:0006725,GO:0006807,GO:0006996,GO:0007165,GO:0007166,GO:0007259,GO:0008023,GO:0008150,GO:0008152,GO:0008213,GO:0009058,GO:0009059,GO:…
g17944.t1	6mA	GO:0000122,GO:0000975,GO:0000976,GO:0000977,GO:0000978,GO:0000981,GO:0000982,GO:0000987,GO:0001012,GO:0001067,GO:0001071,GO:0001077,GO:0001159,GO:0001228,GO:0001817,GO:0001818,GO:0002064,GO:0002376,GO:0002507,GO:0002508,GO:0002634,GO:0002635,GO:0002643,GO:0002645,GO:0002646,GO:0002648,GO:0002661,GO:0002663,GO:0002682,GO:0002683,GO:0002684,GO:0002694,GO:0002695,GO:0002697,GO:0002698,GO:0002703,GO:…
g73685.t1	6mA	GO:0000122,GO:0000975,GO:0000976,GO:0000977,GO:0000979,GO:0001012,GO:0001046,GO:0001047,GO:0001067,GO:0001558,GO:0002009,GO:0003674,GO:0003676,GO:0003677,GO:0003723,GO:0003824,GO:0005488,GO:0005515,GO:0005575,GO:0005730,GO:0006139,GO:0006325,GO:0006351,GO:0006355,GO:0006357,GO:0006464,GO:0006482,GO:0006513,GO:0006725,GO:0006807,GO:0006996,GO:0007276,GO:0007283,GO:0008150,GO:0008152,GO:0008214,GO:…
g63524.t1	6mA	GO:0000122,GO:0000975,GO:0000976,GO:0000981,GO:0001046,GO:0001047,GO:0001067,GO:0001071,GO:0003674,GO:0003676,GO:0003677,GO:0003700,GO:0003705,GO:0005488,GO:0005515,GO:0005575,GO:0005634,GO:0005654,GO:0005667,GO:0005730,GO:0005737,GO:0005739,GO:0006139,GO:0006351,GO:0006355,GO:0006357,GO:0006366,GO:0006725,GO:0006807,GO:0007050,GO:0007420,GO:0007517,GO:0007623,GO:0008150,GO:0008152,GO:0008270,GO:…
g21509.t1	6mA	GO:0000122,GO:0000981,GO:0000982,GO:0001071,GO:0001078,GO:0001227,GO:0001708,GO:0001709,GO:0001752,GO:0001754,GO:0003008,GO:0003674,GO:0003676,GO:0003677,GO:0003700,GO:0005488,GO:0005575,GO:0005634,GO:0005875,GO:0005886,GO:0005938,GO:0006139,GO:0006351,GO:0006355,GO:0006357,GO:0006725,GO:0006807,GO:0006810,GO:0006897,GO:0006909,GO:0006928,GO:0007399,GO:0007400,GO:0007402,GO:0007405,GO:0007406,GO:…
g48376.t1	6mA	GO:0000122,GO:0000988,GO:0000989,GO:0001664,GO:0001817,GO:0001818,GO:0001846,GO:0001848,GO:0001849,GO:0002252,GO:0002253,GO:0002376,GO:0002673,GO:0002682,GO:0002683,GO:0002684,GO:0002685,GO:0002687,GO:0002688,GO:0002690,GO:0002697,GO:0002698,GO:0002831,GO:0002832,GO:0002920,GO:0003674,GO:0003676,GO:0003712,GO:0003714,GO:0003723,GO:0003729,GO:0005080,GO:0005102,GO:0005488,GO:0005515,GO:0005539,GO:…
g14270.t1	6mA	GO:0000122,GO:0001085,GO:0001102,GO:0003674,GO:0003676,GO:0003677,GO:0003824,GO:0004857,GO:0005488,GO:0005515,GO:0005575,GO:0005634,GO:0005737,GO:0005975,GO:0005996,GO:0006012,GO:0006139,GO:0006351,GO:0006355,GO:0006357,GO:0006725,GO:0006807,GO:0008134,GO:0008150,GO:0008152,GO:0009058,GO:0009059,GO:0009889,GO:0009890,GO:0009892,GO:0009987,GO:0010468,GO:0010556,GO:0010558,GO:0010563,GO:0010605,GO:…
g62486.t1	6mA	GO:0000122,GO:0001085,GO:0001103,GO:0003674,GO:0005488,GO:0005515,GO:0005575,GO:0005634,GO:0005694,GO:0005700,GO:0006139,GO:0006325,GO:0006333,GO:0006334,GO:0006351,GO:0006355,GO:0006357,GO:0006461,GO:0006725,GO:0006807,GO:0007517,GO:0008134,GO:0008150,GO:0008152,GO:0008593,GO:0009058,GO:0009059,GO:0009653,GO:0009889,GO:0009890,GO:0009892,GO:0009966,GO:0009968,GO:0009987,GO:0010468,GO:0010556,GO:…
g48824.t1	6mA	GO:0000122,GO:0001708,GO:0001709,GO:0003674,GO:0003676,GO:0003677,GO:0005488,GO:0005575,GO:0005634,GO:0006355,GO:0006357,GO:0007501,GO:0007517,GO:0007521,GO:0008150,GO:0009889,GO:0009890,GO:0009892,GO:0009987,GO:0010468,GO:0010556,GO:0010558,GO:0010605,GO:0010629,GO:0019219,GO:0019222,GO:0031323,GO:0031324,GO:0031326,GO:0031327,GO:0032502,GO:0043226,GO:0043227,GO:0043229,GO:0043231,GO:0043565,GO:…
g42652.t1	6mA	GO:0000122,GO:0002069,GO:0002070,GO:0002071,GO:0003674,GO:0003676,GO:0003677,GO:0005488,GO:0005575,GO:0005634,GO:0006139,GO:0006351,GO:0006355,GO:0006357,GO:0006725,GO:0006807,GO:0008150,GO:0008152,GO:0008283,GO:0009058,GO:0009059,GO:0009593,GO:0009730,GO:0009732,GO:0009743,GO:0009746,GO:0009749,GO:0009889,GO:0009890,GO:0009891,GO:0009892,GO:0009893,GO:0009987,GO:0010033,GO:0010468,GO:0010556,GO:…
g65082.t1	6mA	GO:0000132,GO:0000226,GO:0001736,GO:0001764,GO:0001838,GO:0001944,GO:0002009,GO:0003674,GO:0005488,GO:0005515,GO:0005575,GO:0005737,GO:0005886,GO:0005911,GO:0005912,GO:0005913,GO:0006915,GO:0006928,GO:0006935,GO:0006996,GO:0007010,GO:0007017,GO:0007155,GO:0007163,GO:0007164,GO:0007346,GO:0008150,GO:0008219,GO:0008283,GO:0009653,GO:0009987,GO:0010623,GO:0010941,GO:0010942,GO:0012501,GO:0014021,GO:…
g17073.t1	6mA	GO:0000139,GO:0000166,GO:0000935,GO:0001558,GO:0001882,GO:0001883,GO:0003674,GO:0003824,GO:0003924,GO:0005488,GO:0005525,GO:0005575,GO:0005886,GO:0005938,GO:0006810,GO:0006886,GO:0006888,GO:0007165,GO:0007264,GO:0008104,GO:0008150,GO:0015031,GO:0016020,GO:0016192,GO:0016462,GO:0016482,GO:0016787,GO:0016817,GO:0016818,GO:0017076,GO:0017111,GO:0019001,GO:0022603,GO:0022604,GO:0030307,GO:0030428,GO:…
g23356.t1	6mA	GO:0000139,GO:0000166,GO:0001745,GO:0001882,GO:0001883,GO:0003006,GO:0003674,GO:0003824,GO:0003924,GO:0005488,GO:0005525,GO:0005575,GO:0005794,GO:0006403,GO:0006810,GO:0006887,GO:0006890,GO:0006891,GO:0006928,GO:0006950,GO:0006952,GO:0007017,GO:0007165,GO:0007264,GO:0007265,GO:0007293,GO:0007316,GO:0007411,GO:0008103,GO:0008104,GO:0008150,GO:0008298,GO:0009605,GO:0009607,GO:0009620,GO:0009653,GO:…
g29291.t1	6mA	GO:0000139,GO:0000166,GO:0001882,GO:0001883,GO:0003674,GO:0003824,GO:0003924,GO:0005488,GO:0005525,GO:0005575,GO:0005768,GO:0005802,GO:0006810,GO:0006892,GO:0006895,GO:0006950,GO:0006952,GO:0006996,GO:0007165,GO:0007166,GO:0007167,GO:0007169,GO:0007264,GO:0008104,GO:0008150,GO:0008543,GO:0009605,GO:0009607,GO:0009617,GO:0009790,GO:0009987,GO:0010008,GO:0012506,GO:0015031,GO:0016020,GO:0016023,GO:…
g65202.t1	6mA	GO:0000139,GO:0000166,GO:0001882,GO:0001883,GO:0003674,GO:0005488,GO:0005525,GO:0005575,GO:0006810,GO:0006886,GO:0006887,GO:0006892,GO:0006893,GO:0007009,GO:0007165,GO:0007264,GO:0008104,GO:0008150,GO:0009987,GO:0012506,GO:0015031,GO:0016020,GO:0016043,GO:0016192,GO:0016482,GO:0017076,GO:0017157,GO:0019001,GO:0019002,GO:0030658,GO:0030659,GO:0030667,GO:0031090,GO:0031224,GO:0031226,GO:0032502,GO:…
g116.t1	6mA	GO:0000139,GO:0000271,GO:0003008,GO:0003674,GO:0003824,GO:0005575,GO:0005975,GO:0005976,GO:0006022,GO:0006023,GO:0006024,GO:0006082,GO:0006464,GO:0006486,GO:0006493,GO:0006790,GO:0006807,GO:0006928,GO:0007411,GO:0007600,GO:0007606,GO:0007608,GO:0008150,GO:0008152,GO:0008194,GO:0008375,GO:0008378,GO:0008532,GO:0009058,GO:0009059,GO:0009987,GO:0016020,GO:0016021,GO:0016051,GO:0016266,GO:0016740,GO:…
g37175.t1	6mA	GO:0000139,GO:0000271,GO:0003008,GO:0003674,GO:0003824,GO:0005575,GO:0005975,GO:0005976,GO:0006022,GO:0006023,GO:0006024,GO:0006082,GO:0006464,GO:0006486,GO:0006493,GO:0006790,GO:0006807,GO:0006928,GO:0007411,GO:0007600,GO:0007606,GO:0007608,GO:0008150,GO:0008152,GO:0008194,GO:0008375,GO:0008378,GO:0008532,GO:0009058,GO:0009059,GO:0009987,GO:0016020,GO:0016021,GO:0016051,GO:0016266,GO:0016740,GO:…
g3842.t1	6mA	GO:0000139,GO:0001525,GO:0003674,GO:0004872,GO:0005488,GO:0005509,GO:0005515,GO:0005575,GO:0005634,GO:0005796,GO:0005912,GO:0006139,GO:0006351,GO:0006355,GO:0006725,GO:0006807,GO:0007165,GO:0007166,GO:0007219,GO:0008150,GO:0008152,GO:0009058,GO:0009059,GO:0009653,GO:0009889,GO:0009987,GO:0010468,GO:0010556,GO:0016020,GO:0016021,GO:0016043,GO:0016070,GO:0016324,GO:0018130,GO:0019219,GO:0019222,GO:…
g42039.t1	6mA	GO:0000139,GO:0001537,GO:0002063,GO:0003674,GO:0003824,GO:0005575,GO:0005975,GO:0006022,GO:0006082,GO:0006790,GO:0006807,GO:0007585,GO:0008146,GO:0008150,GO:0008152,GO:0009058,GO:0009653,GO:0009791,GO:0009966,GO:0009968,GO:0009987,GO:0010646,GO:0010648,GO:0010941,GO:0016020,GO:0016021,GO:0016051,GO:0016740,GO:0016782,GO:0017015,GO:0023051,GO:0023057,GO:0030203,GO:0030204,GO:0030512,GO:0031090,GO:…
g27107.t1	6mA	GO:0000139,GO:0001726,GO:0003674,GO:0003824,GO:0004439,GO:0004445,GO:0005575,GO:0005737,GO:0005856,GO:0005886,GO:0005930,GO:0006629,GO:0006644,GO:0006650,GO:0006793,GO:0006796,GO:0008150,GO:0008152,GO:0009987,GO:0010720,GO:0010975,GO:0010976,GO:0016020,GO:0016311,GO:0016787,GO:0016788,GO:0016791,GO:0019637,GO:0030258,GO:0031090,GO:0031344,GO:0031346,GO:0032580,GO:0034593,GO:0034595,GO:0042578,GO:…
g55491.t1	6mA	GO:0000139,GO:0001775,GO:0002252,GO:0002361,GO:0002376,GO:0002521,GO:0002522,GO:0003674,GO:0003824,GO:0005575,GO:0005794,GO:0005975,GO:0005996,GO:0006004,GO:0006464,GO:0006486,GO:0006928,GO:0007155,GO:0007159,GO:0008150,GO:0008152,GO:0008417,GO:0009056,GO:0009987,GO:0016020,GO:0016021,GO:0016052,GO:0016337,GO:0016477,GO:0016740,GO:0016757,GO:0016758,GO:0019317,GO:0019318,GO:0019320,GO:0019538,GO:…
g67900.t1	6mA	GO:0000139,GO:0001775,GO:0002252,GO:0002361,GO:0002376,GO:0002521,GO:0002522,GO:0003674,GO:0003824,GO:0005575,GO:0005794,GO:0005975,GO:0005996,GO:0006004,GO:0006464,GO:0006486,GO:0006928,GO:0007155,GO:0007159,GO:0008150,GO:0008152,GO:0008417,GO:0009056,GO:0009987,GO:0016020,GO:0016021,GO:0016052,GO:0016337,GO:0016477,GO:0016740,GO:0016757,GO:0016758,GO:0019317,GO:0019318,GO:0019320,GO:0019538,GO:…
g58210.t1	6mA	GO:0000139,GO:0002063,GO:0003002,GO:0003674,GO:0003824,GO:0005488,GO:0005575,GO:0005576,GO:0006022,GO:0006023,GO:0006024,GO:0006082,GO:0006790,GO:0006807,GO:0007389,GO:0008150,GO:0008152,GO:0008194,GO:0008376,GO:0008589,GO:0009058,GO:0009059,GO:0009605,GO:0009653,GO:0009887,GO:0009954,GO:0009966,GO:0009967,GO:0009987,GO:0009991,GO:0010646,GO:0010647,GO:0015020,GO:0016020,GO:0016021,GO:0016740,GO:…
g68823.t1	6mA	GO:0000139,GO:0002063,GO:0003002,GO:0003674,GO:0003824,GO:0005488,GO:0005575,GO:0005576,GO:0006022,GO:0006023,GO:0006024,GO:0006082,GO:0006790,GO:0006807,GO:0007389,GO:0008150,GO:0008152,GO:0008194,GO:0008376,GO:0008589,GO:0009058,GO:0009059,GO:0009605,GO:0009653,GO:0009887,GO:0009954,GO:0009966,GO:0009967,GO:0009987,GO:0009991,GO:0010646,GO:0010647,GO:0015020,GO:0016020,GO:0016021,GO:0016740,GO:…
g49980.t1	6mA	GO:0000139,GO:0002230,GO:0002682,GO:0002697,GO:0002831,GO:0005575,GO:0005739,GO:0006810,GO:0008150,GO:0009987,GO:0016020,GO:0016021,GO:0031090,GO:0031224,GO:0031347,GO:0032101,GO:0043226,GO:0043227,GO:0043229,GO:0043231,GO:0043900,GO:0044422,GO:0044424,GO:0044425,GO:0044431,GO:0044444,GO:0044446,GO:0044464,GO:0044699,GO:0044763,GO:0044765,GO:0048583,GO:0050688,GO:0050691,GO:0050789,GO:0051179,GO:…
g50836.t1	6mA	GO:0000139,GO:0003674,GO:0003824,GO:0003945,GO:0005488,GO:0005575,GO:0005975,GO:0006464,GO:0006486,GO:0008150,GO:0008152,GO:0008194,GO:0008378,GO:0009987,GO:0016020,GO:0016021,GO:0016740,GO:0016757,GO:0016758,GO:0019538,GO:0031090,GO:0031224,GO:0032580,GO:0035250,GO:0036211,GO:0043167,GO:0043169,GO:0043170,GO:0043412,GO:0043413,GO:0044237,GO:0044238,GO:0044260,GO:0044267,GO:0044422,GO:0044424,GO:…
g20240.t1	6mA	GO:0000139,GO:0003674,GO:0003824,GO:0004175,GO:0004252,GO:0005575,GO:0005789,GO:0006810,GO:0006928,GO:0008104,GO:0008150,GO:0008233,GO:0008236,GO:0008283,GO:0009894,GO:0009966,GO:0009987,GO:0010646,GO:0015031,GO:0016020,GO:0016021,GO:0016477,GO:0016787,GO:0017171,GO:0019222,GO:0023051,GO:0030162,GO:0031090,GO:0031224,GO:0031323,GO:0031329,GO:0032268,GO:0032879,GO:0032880,GO:0033036,GO:0040011,GO:…
g60580.t1	6mA	GO:0000139,GO:0003674,GO:0003824,GO:0004653,GO:0005488,GO:0005575,GO:0005975,GO:0006464,GO:0006486,GO:0006493,GO:0008150,GO:0008152,GO:0008194,GO:0008376,GO:0009987,GO:0016020,GO:0016021,GO:0016740,GO:0016757,GO:0016758,GO:0018193,GO:0018210,GO:0018243,GO:0019538,GO:0030246,GO:0031090,GO:0031224,GO:0036211,GO:0043167,GO:0043169,GO:0043170,GO:0043412,GO:0043413,GO:0044237,GO:0044238,GO:0044260,GO:…
g70460.t1	6mA	GO:0000139,GO:0003674,GO:0003824,GO:0004656,GO:0005488,GO:0005506,GO:0005575,GO:0005783,GO:0005789,GO:0008150,GO:0008152,GO:0009987,GO:0016020,GO:0016021,GO:0016491,GO:0016705,GO:0016706,GO:0019798,GO:0019842,GO:0030246,GO:0031090,GO:0031224,GO:0031406,GO:0031418,GO:0031543,GO:0031545,GO:0032502,GO:0036094,GO:0043167,GO:0043168,GO:0043169,GO:0043177,GO:0043226,GO:0043227,GO:0043229,GO:0043231,GO:…
g43108.t1	6mA	GO:0000139,GO:0003674,GO:0003824,GO:0004871,GO:0005215,GO:0005488,GO:0005515,GO:0005575,GO:0005794,GO:0006464,GO:0006497,GO:0006810,GO:0008104,GO:0008150,GO:0008152,GO:0008270,GO:0008324,GO:0009966,GO:0009967,GO:0009987,GO:0010646,GO:0010647,GO:0012506,GO:0015031,GO:0015075,GO:0015095,GO:0016020,GO:0016021,GO:0016409,GO:0016417,GO:0016740,GO:0016746,GO:0016747,GO:0018345,GO:0019538,GO:0019706,GO:…
g21487.t1	6mA	GO:0000139,GO:0003674,GO:0003824,GO:0005215,GO:0005216,GO:0005488,GO:0005575,GO:0005794,GO:0005975,GO:0006464,GO:0006486,GO:0006493,GO:0006810,GO:0006811,GO:0008150,GO:0008152,GO:0008194,GO:0009987,GO:0015020,GO:0015075,GO:0015267,GO:0016020,GO:0016021,GO:0016740,GO:0016757,GO:0016758,GO:0019538,GO:0022803,GO:0022838,GO:0022857,GO:0022891,GO:0022892,GO:0031090,GO:0031224,GO:0032502,GO:0035268,GO:…
g18848.t1	6mA	GO:0000139,GO:0003674,GO:0003824,GO:0005488,GO:0005575,GO:0005975,GO:0006464,GO:0006486,GO:0008150,GO:0008152,GO:0009987,GO:0016020,GO:0016021,GO:0016740,GO:0016757,GO:0019538,GO:0030246,GO:0031090,GO:0031224,GO:0036211,GO:0043167,GO:0043169,GO:0043170,GO:0043412,GO:0043413,GO:0044237,GO:0044238,GO:0044260,GO:0044267,GO:0044422,GO:0044424,GO:0044425,GO:0044431,GO:0044444,GO:0044446,GO:0044464,GO:…
g39331.t1	6mA	GO:0000139,GO:0003674,GO:0005215,GO:0005216,GO:0005244,GO:0005575,GO:0006810,GO:0008104,GO:0008150,GO:0015031,GO:0015075,GO:0015267,GO:0016020,GO:0016021,GO:0022803,GO:0022832,GO:0022836,GO:0022838,GO:0022857,GO:0022891,GO:0022892,GO:0031090,GO:0031224,GO:0033036,GO:0044422,GO:0044424,GO:0044425,GO:0044431,GO:0044444,GO:0044446,GO:0044464,GO:0045184,GO:0051179,GO:0051234,GO:0071702,GO:0098588
g16003.t1	6mA	GO:0000139,GO:0003674,GO:0005215,GO:0005575,GO:0005634,GO:0005789,GO:0006464,GO:0006497,GO:0006505,GO:0006506,GO:0006629,GO:0006643,GO:0006644,GO:0006650,GO:0006661,GO:0006664,GO:0006793,GO:0006796,GO:0006810,GO:0006950,GO:0006974,GO:0007165,GO:0008104,GO:0008150,GO:0008152,GO:0008565,GO:0008610,GO:0008630,GO:0008654,GO:0009058,GO:0009247,GO:0009966,GO:0009968,GO:0009987,GO:0010646,GO:0010648,GO:…
g73109.t1	6mA	GO:0000139,GO:0003674,GO:0005215,GO:0005575,GO:0005795,GO:0005829,GO:0006810,GO:0006891,GO:0006996,GO:0007030,GO:0008150,GO:0008565,GO:0009987,GO:0016020,GO:0016043,GO:0016192,GO:0017119,GO:0022892,GO:0031090,GO:0032991,GO:0043234,GO:0044422,GO:0044424,GO:0044431,GO:0044444,GO:0044446,GO:0044464,GO:0044699,GO:0044765,GO:0046907,GO:0048193,GO:0051179,GO:0051234,GO:0051649,GO:0071840,GO:0098588,GO:…
g1913.t1	6mA	GO:0000139,GO:0003674,GO:0005488,GO:0005515,GO:0005575,GO:0008150,GO:0009893,GO:0009966,GO:0009967,GO:0010562,GO:0010632,GO:0010634,GO:0010646,GO:0010647,GO:0010717,GO:0010718,GO:0010720,GO:0010769,GO:0010770,GO:0016020,GO:0019220,GO:0019222,GO:0022603,GO:0022604,GO:0023051,GO:0023056,GO:0030334,GO:0030335,GO:0031090,GO:0031323,GO:0031325,GO:0031982,GO:0031988,GO:0032879,GO:0040012,GO:0040017,GO:…
g12312.t1	6mA	GO:0000139,GO:0003674,GO:0005488,GO:0005543,GO:0005575,GO:0005622,GO:0005737,GO:0005789,GO:0005811,GO:0006810,GO:0008104,GO:0008150,GO:0008289,GO:0015031,GO:0016020,GO:0030496,GO:0031090,GO:0032154,GO:0032155,GO:0032580,GO:0033036,GO:0043167,GO:0043168,GO:0043169,GO:0043226,GO:0043228,GO:0043229,GO:0043232,GO:0044422,GO:0044424,GO:0044425,GO:0044431,GO:0044432,GO:0044444,GO:0044446,GO:0044464,GO:…
g39395.t1	6mA	GO:0000139,GO:0005575,GO:0005789,GO:0005798,GO:0005886,GO:0006810,GO:0006890,GO:0006900,GO:0006996,GO:0008104,GO:0008150,GO:0009987,GO:0012506,GO:0015031,GO:0016020,GO:0016021,GO:0016023,GO:0016043,GO:0016050,GO:0016192,GO:0019222,GO:0030133,GO:0030135,GO:0030136,GO:0030137,GO:0030140,GO:0030658,GO:0030659,GO:0030667,GO:0031090,GO:0031224,GO:0031323,GO:0031410,GO:0031982,GO:0031988,GO:0032991,GO:…
g2214.t1	6mA	GO:0000139,GO:0005575,GO:0006810,GO:0006891,GO:0008104,GO:0008150,GO:0015031,GO:0016020,GO:0016192,GO:0017119,GO:0031090,GO:0032991,GO:0033036,GO:0043234,GO:0044422,GO:0044424,GO:0044431,GO:0044444,GO:0044446,GO:0044464,GO:0044699,GO:0044765,GO:0045184,GO:0046907,GO:0048193,GO:0051179,GO:0051234,GO:0051649,GO:0071702,GO:0098588,GO:1902578,GO:1902582
g70629.t1	6mA	GO:0000139,GO:0005575,GO:0010008,GO:0016020,GO:0016021,GO:0031090,GO:0031224,GO:0044422,GO:0044424,GO:0044425,GO:0044431,GO:0044440,GO:0044444,GO:0044446,GO:0044464,GO:0098588
g15658.t1	6mA	GO:0000149,GO:0000281,GO:0000910,GO:0001505,GO:0003674,GO:0005484,GO:0005488,GO:0005515,GO:0005575,GO:0005886,GO:0006810,GO:0006836,GO:0006886,GO:0006904,GO:0006906,GO:0006996,GO:0007154,GO:0007267,GO:0007268,GO:0007269,GO:0007274,GO:0007317,GO:0007349,GO:0007482,GO:0008021,GO:0008104,GO:0008150,GO:0009987,GO:0012505,GO:0015031,GO:0016020,GO:0016021,GO:0016023,GO:0016043,GO:0016050,GO:0016081,GO:…
g65493.t1	6mA	GO:0000149,GO:0000956,GO:0003674,GO:0005488,GO:0005515,GO:0005575,GO:0005783,GO:0005789,GO:0006139,GO:0006401,GO:0006402,GO:0006725,GO:0006807,GO:0006810,GO:0006890,GO:0008104,GO:0008150,GO:0008152,GO:0009056,GO:0009057,GO:0009892,GO:0009894,GO:0009895,GO:0009987,GO:0010605,GO:0015031,GO:0016020,GO:0016070,GO:0016071,GO:0016192,GO:0019219,GO:0019222,GO:0019439,GO:0031090,GO:0031323,GO:0031324,GO:…
g28537.t1	6mA	GO:0000149,GO:0001505,GO:0003674,GO:0005198,GO:0005484,GO:0005488,GO:0005515,GO:0005575,GO:0005886,GO:0006810,GO:0006836,GO:0006886,GO:0006906,GO:0006996,GO:0007154,GO:0007165,GO:0007166,GO:0007167,GO:0007169,GO:0007267,GO:0007268,GO:0007269,GO:0007399,GO:0008021,GO:0008104,GO:0008150,GO:0008286,GO:0009987,GO:0012505,GO:0015031,GO:0016020,GO:0016021,GO:0016023,GO:0016043,GO:0016050,GO:0017157,GO:…
g63428.t1	6mA	GO:0000149,GO:0001505,GO:0003674,GO:0005488,GO:0005509,GO:0005515,GO:0005543,GO:0005544,GO:0005575,GO:0006810,GO:0006836,GO:0006897,GO:0007269,GO:0008150,GO:0008289,GO:0009987,GO:0010646,GO:0010647,GO:0016020,GO:0016021,GO:0016192,GO:0019905,GO:0023051,GO:0023056,GO:0023061,GO:0030054,GO:0030276,GO:0030672,GO:0031090,GO:0031224,GO:0032879,GO:0032940,GO:0043167,GO:0043168,GO:0043169,GO:0044422,GO:…
g16223.t1	6mA	GO:0000149,GO:0003674,GO:0005484,GO:0005488,GO:0005515,GO:0005575,GO:0005765,GO:0005768,GO:0005774,GO:0006810,GO:0006886,GO:0006887,GO:0006906,GO:0006996,GO:0007034,GO:0007041,GO:0008104,GO:0008150,GO:0008333,GO:0009987,GO:0010008,GO:0015031,GO:0016020,GO:0016021,GO:0016043,GO:0016050,GO:0016079,GO:0016192,GO:0016197,GO:0016482,GO:0022406,GO:0031090,GO:0031201,GO:0031224,GO:0031901,GO:0031902,GO:…
g73562.t1	6mA	GO:0000151,GO:0000152,GO:0000209,GO:0002065,GO:0003674,GO:0003824,GO:0004842,GO:0005488,GO:0005515,GO:0005575,GO:0005680,GO:0006464,GO:0007165,GO:0007166,GO:0008150,GO:0008152,GO:0008270,GO:0009987,GO:0016567,GO:0016740,GO:0016874,GO:0016879,GO:0016881,GO:0019538,GO:0019787,GO:0030154,GO:0030318,GO:0030855,GO:0031386,GO:0031461,GO:0032446,GO:0032502,GO:0032991,GO:0036211,GO:0043167,GO:0043169,GO:…
g61655.t1	6mA	GO:0000151,GO:0000152,GO:0000209,GO:0003006,GO:0003674,GO:0003676,GO:0003677,GO:0003682,GO:0003824,GO:0004842,GO:0005102,GO:0005488,GO:0005515,GO:0005575,GO:0005634,GO:0005654,GO:0005737,GO:0005829,GO:0006139,GO:0006351,GO:0006355,GO:0006357,GO:0006464,GO:0006508,GO:0006511,GO:0006725,GO:0006807,GO:0007276,GO:0007283,GO:0008134,GO:0008150,GO:0008152,GO:0008270,GO:0008406,GO:0008584,GO:0009056,GO:…
g25422.t1	6mA	GO:0000151,GO:0000152,GO:0000209,GO:0003674,GO:0003824,GO:0004842,GO:0005488,GO:0005515,GO:0005575,GO:0005680,GO:0005737,GO:0006464,GO:0008150,GO:0008152,GO:0008270,GO:0009987,GO:0012505,GO:0016021,GO:0016567,GO:0016740,GO:0016874,GO:0019538,GO:0019787,GO:0031224,GO:0031461,GO:0032446,GO:0032991,GO:0036211,GO:0043167,GO:0043169,GO:0043170,GO:0043234,GO:0043412,GO:0044237,GO:0044238,GO:0044260,GO:…
g15871.t1	6mA	GO:0000151,GO:0000166,GO:0000209,GO:0001882,GO:0001883,GO:0003674,GO:0003824,GO:0004842,GO:0005488,GO:0005524,GO:0005575,GO:0006464,GO:0008150,GO:0008152,GO:0009987,GO:0016567,GO:0016740,GO:0017076,GO:0019538,GO:0019787,GO:0030554,GO:0031982,GO:0031988,GO:0032446,GO:0032549,GO:0032550,GO:0032553,GO:0032555,GO:0032559,GO:0032991,GO:0035639,GO:0036094,GO:0036211,GO:0043167,GO:0043168,GO:0043170,GO:…
g40635.t1	6mA	GO:0000151,GO:0000209,GO:0000323,GO:0001906,GO:0001909,GO:0002228,GO:0002250,GO:0002252,GO:0002376,GO:0002443,GO:0002449,GO:0003674,GO:0003824,GO:0004842,GO:0005488,GO:0005515,GO:0005575,GO:0005737,GO:0005764,GO:0005773,GO:0006464,GO:0006810,GO:0006950,GO:0006952,GO:0006955,GO:0008104,GO:0008150,GO:0008152,GO:0008270,GO:0009306,GO:0009893,GO:0009894,GO:0009896,GO:0009987,GO:0010604,GO:0015031,GO:…
g56576.t1	6mA	GO:0000151,GO:0000209,GO:0003674,GO:0003824,GO:0004842,GO:0005488,GO:0005515,GO:0005575,GO:0005634,GO:0005737,GO:0006464,GO:0008150,GO:0008152,GO:0009893,GO:0009894,GO:0009896,GO:0009987,GO:0010604,GO:0016567,GO:0016740,GO:0019222,GO:0019538,GO:0019787,GO:0019899,GO:0030162,GO:0031323,GO:0031325,GO:0031329,GO:0031331,GO:0031624,GO:0032268,GO:0032270,GO:0032434,GO:0032436,GO:0032446,GO:0032991,GO:…
g24487.t1	6mA	GO:0000151,GO:0000209,GO:0003674,GO:0003824,GO:0004842,GO:0005488,GO:0005515,GO:0005575,GO:0005737,GO:0005802,GO:0006464,GO:0006508,GO:0006511,GO:0006810,GO:0006892,GO:0006895,GO:0008104,GO:0008150,GO:0008152,GO:0009056,GO:0009057,GO:0009987,GO:0010498,GO:0010941,GO:0015031,GO:0016192,GO:0016197,GO:0016482,GO:0016567,GO:0016604,GO:0016605,GO:0016740,GO:0019538,GO:0019787,GO:0019941,GO:0019955,GO:…
g22483.t1	6mA	GO:0000151,GO:0000209,GO:0003674,GO:0003824,GO:0004842,GO:0005488,GO:0005515,GO:0005575,GO:0005737,GO:0005829,GO:0006464,GO:0006508,GO:0006511,GO:0007165,GO:0007166,GO:0008150,GO:0008152,GO:0008270,GO:0009056,GO:0009057,GO:0009893,GO:0009894,GO:0009896,GO:0009987,GO:0010604,GO:0016567,GO:0016740,GO:0016874,GO:0019221,GO:0019222,GO:0019538,GO:0019787,GO:0019899,GO:0019941,GO:0030162,GO:0031323,GO:…
g10152.t1	6mA	GO:0000151,GO:0003674,GO:0003824,GO:0004842,GO:0005488,GO:0005515,GO:0005575,GO:0006464,GO:0006508,GO:0006511,GO:0006513,GO:0008150,GO:0008152,GO:0009056,GO:0009057,GO:0009894,GO:0009966,GO:0009987,GO:0010498,GO:0010506,GO:0010646,GO:0014066,GO:0016020,GO:0016567,GO:0016740,GO:0019005,GO:0019222,GO:0019538,GO:0019787,GO:0019941,GO:0023051,GO:0030163,GO:0031146,GO:0031323,GO:0031329,GO:0031461,GO:…
g232.t1	6mA	GO:0000151,GO:0003674,GO:0005488,GO:0005515,GO:0005575,GO:0005634,GO:0006464,GO:0008150,GO:0008152,GO:0009893,GO:0009987,GO:0010604,GO:0019222,GO:0019538,GO:0019899,GO:0031323,GO:0031325,GO:0031396,GO:0031398,GO:0031399,GO:0031401,GO:0031624,GO:0032182,GO:0032268,GO:0032270,GO:0032446,GO:0032991,GO:0036211,GO:0043085,GO:0043170,GO:0043226,GO:0043227,GO:0043229,GO:0043231,GO:0043234,GO:0043412,GO:…
g9781.t1	6mA	GO:0000151,GO:0003674,GO:0005488,GO:0005515,GO:0005575,GO:0006464,GO:0008150,GO:0008152,GO:0009987,GO:0016567,GO:0019538,GO:0031461,GO:0031463,GO:0032446,GO:0032991,GO:0036211,GO:0043170,GO:0043234,GO:0043412,GO:0044237,GO:0044238,GO:0044260,GO:0044267,GO:0044424,GO:0044464,GO:0070647,GO:0071704,GO:1902494,GO:1990234
g8266.t1	6mA	GO:0000159,GO:0000166,GO:0000226,GO:0000413,GO:0001882,GO:0001883,GO:0003674,GO:0003755,GO:0003824,GO:0005488,GO:0005524,GO:0005575,GO:0005634,GO:0005654,GO:0005737,GO:0006464,GO:0006996,GO:0007010,GO:0007017,GO:0007051,GO:0007052,GO:0008047,GO:0008150,GO:0008152,GO:0008160,GO:0008287,GO:0008601,GO:0009892,GO:0009893,GO:0009987,GO:0010562,GO:0010563,GO:0010921,GO:0010922,GO:0010923,GO:0010941,GO:…
g72154.t1	6mA	GO:0000159,GO:0000280,GO:0003674,GO:0005575,GO:0005737,GO:0006996,GO:0007067,GO:0008150,GO:0008287,GO:0008601,GO:0009987,GO:0010458,GO:0010921,GO:0016043,GO:0019208,GO:0019220,GO:0019222,GO:0019888,GO:0022402,GO:0030234,GO:0031323,GO:0032991,GO:0034047,GO:0035303,GO:0043234,GO:0043666,GO:0044424,GO:0044464,GO:0044699,GO:0044763,GO:0048285,GO:0050789,GO:0050790,GO:0050794,GO:0051174,GO:0051301,GO:…
g47668.t1	6mA	GO:0000165,GO:0000166,GO:0000186,GO:0001505,GO:0001666,GO:0001726,GO:0001763,GO:0001882,GO:0001883,GO:0001932,GO:0001934,GO:0002009,GO:0003008,GO:0003674,GO:0003824,GO:0004672,GO:0004674,GO:0004702,GO:0004709,GO:0004871,GO:0005057,GO:0005488,GO:0005515,GO:0005518,GO:0005524,GO:0005575,GO:0005737,GO:0005794,GO:0005829,GO:0005886,GO:0005911,GO:0005912,GO:0005924,GO:0005925,GO:0006464,GO:0006468,GO:…
g19510.t1	6mA	GO:0000165,GO:0000166,GO:0000186,GO:0001882,GO:0001883,GO:0001890,GO:0001932,GO:0001934,GO:0003006,GO:0003674,GO:0003824,GO:0004672,GO:0004674,GO:0004702,GO:0004709,GO:0004871,GO:0005057,GO:0005488,GO:0005524,GO:0005575,GO:0005737,GO:0006275,GO:0006464,GO:0006468,GO:0006793,GO:0006796,GO:0006950,GO:0007165,GO:0007346,GO:0007530,GO:0007538,GO:0007542,GO:0008150,GO:0008152,GO:0009314,GO:0009411,GO:…
g38084.t1	6mA	GO:0000165,GO:0000166,GO:0001882,GO:0001883,GO:0002009,GO:0002376,GO:0003006,GO:0003008,GO:0003674,GO:0003824,GO:0004672,GO:0004713,GO:0004715,GO:0005488,GO:0005524,GO:0005575,GO:0005737,GO:0005886,GO:0006139,GO:0006259,GO:0006260,GO:0006464,GO:0006468,GO:0006725,GO:0006793,GO:0006796,GO:0006807,GO:0006810,GO:0006950,GO:0006952,GO:0006955,GO:0006996,GO:0007010,GO:0007165,GO:0007166,GO:0007167,GO:…
g46779.t1	6mA	GO:0000165,GO:0000186,GO:0000187,GO:0001704,GO:0001706,GO:0001932,GO:0001934,GO:0002376,GO:0002682,GO:0002764,GO:0002768,GO:0003674,GO:0003824,GO:0004721,GO:0004725,GO:0005575,GO:0005654,GO:0006139,GO:0006399,GO:0006400,GO:0006464,GO:0006470,GO:0006725,GO:0006793,GO:0006796,GO:0006807,GO:0006928,GO:0006950,GO:0006952,GO:0006955,GO:0007165,GO:0007166,GO:0007167,GO:0007169,GO:0007173,GO:0007264,GO:…
g61661.t1	6mA	GO:0000166,GO:0000209,GO:0001882,GO:0001883,GO:0003674,GO:0003824,GO:0004842,GO:0005488,GO:0005515,GO:0005524,GO:0005575,GO:0005737,GO:0006464,GO:0006508,GO:0006511,GO:0008150,GO:0008152,GO:0009056,GO:0009057,GO:0009987,GO:0016567,GO:0016740,GO:0017076,GO:0019538,GO:0019787,GO:0019899,GO:0019941,GO:0030554,GO:0031625,GO:0031982,GO:0031988,GO:0032446,GO:0032549,GO:0032550,GO:0032553,GO:0032555,GO:…
g6860.t1	6mA	GO:0000166,GO:0000209,GO:0001882,GO:0001883,GO:0003674,GO:0003824,GO:0004842,GO:0005488,GO:0005524,GO:0005575,GO:0005634,GO:0005737,GO:0006464,GO:0008150,GO:0008152,GO:0009987,GO:0016567,GO:0016740,GO:0017076,GO:0019538,GO:0019787,GO:0030554,GO:0032446,GO:0032549,GO:0032550,GO:0032553,GO:0032555,GO:0032559,GO:0035639,GO:0036094,GO:0036211,GO:0040008,GO:0043167,GO:0043168,GO:0043170,GO:0043226,GO:…
g23800.t1	6mA	GO:0000166,GO:0000226,GO:0000280,GO:0000776,GO:0001667,GO:0001709,GO:0001882,GO:0001883,GO:0002252,GO:0002376,GO:0003006,GO:0003674,GO:0003774,GO:0003777,GO:0003824,GO:0005488,GO:0005524,GO:0005575,GO:0005737,GO:0005794,GO:0005868,GO:0005874,GO:0005875,GO:0005938,GO:0006403,GO:0006582,GO:0006725,GO:0006810,GO:0006886,GO:0006928,GO:0006950,GO:0006952,GO:0006955,GO:0006996,GO:0007005,GO:0007010,GO:…
g73551.t1	6mA	GO:0000166,GO:0000226,GO:0000910,GO:0000922,GO:0001558,GO:0001882,GO:0001883,GO:0003674,GO:0005488,GO:0005525,GO:0005575,GO:0005739,GO:0005768,GO:0005770,GO:0005771,GO:0005802,GO:0005813,GO:0005815,GO:0005828,GO:0005874,GO:0005876,GO:0005886,GO:0006461,GO:0006810,GO:0006887,GO:0006996,GO:0007009,GO:0007010,GO:0007017,GO:0007032,GO:0007051,GO:0007052,GO:0007080,GO:0007165,GO:0007264,GO:0007346,GO:…
g60240.t1	6mA	GO:0000166,GO:0000226,GO:0001882,GO:0001883,GO:0003341,GO:0003674,GO:0003676,GO:0003723,GO:0003774,GO:0003777,GO:0003824,GO:0005488,GO:0005515,GO:0005524,GO:0005575,GO:0005737,GO:0005813,GO:0005815,GO:0005868,GO:0005874,GO:0005875,GO:0006810,GO:0006928,GO:0006996,GO:0007010,GO:0007017,GO:0007018,GO:0008150,GO:0009987,GO:0016020,GO:0016043,GO:0016462,GO:0016787,GO:0016817,GO:0016818,GO:0016887,GO:…
g19393.t1	6mA	GO:0000166,GO:0000228,GO:0000793,GO:0000794,GO:0001701,GO:0001756,GO:0001882,GO:0001883,GO:0001932,GO:0002020,GO:0003002,GO:0003007,GO:0003008,GO:0003012,GO:0003300,GO:0003674,GO:0003779,GO:0003824,GO:0004672,GO:0004674,GO:0004713,GO:0005198,GO:0005200,GO:0005488,GO:0005509,GO:0005515,GO:0005516,GO:0005524,GO:0005575,GO:0005694,GO:0005859,GO:0005865,GO:0006461,GO:0006464,GO:0006468,GO:0006793,GO:…
g57182.t1	6mA	GO:0000166,GO:0000278,GO:0000302,GO:0000722,GO:0000723,GO:0000726,GO:0001882,GO:0001883,GO:0003674,GO:0003676,GO:0003677,GO:0003824,GO:0003909,GO:0003910,GO:0005488,GO:0005524,GO:0005575,GO:0005634,GO:0005654,GO:0005739,GO:0005794,GO:0006139,GO:0006259,GO:0006266,GO:0006271,GO:0006281,GO:0006283,GO:0006284,GO:0006289,GO:0006297,GO:0006298,GO:0006302,GO:0006303,GO:0006310,GO:0006312,GO:0006725,GO:…
g61429.t1	6mA	GO:0000166,GO:0000280,GO:0001882,GO:0001883,GO:0003674,GO:0003824,GO:0004672,GO:0004674,GO:0005488,GO:0005524,GO:0005575,GO:0005634,GO:0005795,GO:0006464,GO:0006468,GO:0006793,GO:0006796,GO:0006996,GO:0007030,GO:0007067,GO:0008150,GO:0008152,GO:0009987,GO:0016043,GO:0016301,GO:0016310,GO:0016740,GO:0016772,GO:0016773,GO:0017076,GO:0018105,GO:0018193,GO:0018209,GO:0019538,GO:0022402,GO:0022411,GO:…
g15455.t1	6mA	GO:0000166,GO:0000287,GO:0001669,GO:0001882,GO:0001883,GO:0003006,GO:0003674,GO:0003824,GO:0004672,GO:0004674,GO:0005488,GO:0005524,GO:0005575,GO:0005929,GO:0006464,GO:0006468,GO:0006793,GO:0006796,GO:0007165,GO:0007275,GO:0007276,GO:0007281,GO:0007283,GO:0007286,GO:0008150,GO:0008152,GO:0009987,GO:0016020,GO:0016023,GO:0016301,GO:0016310,GO:0016740,GO:0016772,GO:0016773,GO:0017076,GO:0019538,GO:…
g8592.t1	6mA	GO:0000166,GO:0000287,GO:0001882,GO:0001883,GO:0003674,GO:0003824,GO:0004672,GO:0004674,GO:0005488,GO:0005524,GO:0005575,GO:0005737,GO:0006464,GO:0006468,GO:0006793,GO:0006796,GO:0007165,GO:0008150,GO:0008152,GO:0009987,GO:0016301,GO:0016310,GO:0016740,GO:0016772,GO:0016773,GO:0017076,GO:0019538,GO:0030554,GO:0032549,GO:0032550,GO:0032553,GO:0032555,GO:0032559,GO:0035556,GO:0035639,GO:0036094,GO:…
g25430.t1	6mA	GO:0000166,GO:0000302,GO:0001666,GO:0001882,GO:0001883,GO:0003674,GO:0003824,GO:0004383,GO:0005488,GO:0005515,GO:0005525,GO:0005575,GO:0005886,GO:0006139,GO:0006163,GO:0006164,GO:0006182,GO:0006725,GO:0006753,GO:0006793,GO:0006796,GO:0006807,GO:0006950,GO:0006979,GO:0007165,GO:0008074,GO:0008150,GO:0008152,GO:0009058,GO:0009117,GO:0009150,GO:0009152,GO:0009165,GO:0009187,GO:0009190,GO:0009259,GO:…
g11658.t1	6mA	GO:0000166,GO:0000306,GO:0000323,GO:0000421,GO:0001882,GO:0001883,GO:0001894,GO:0003674,GO:0003824,GO:0003924,GO:0005488,GO:0005515,GO:0005525,GO:0005575,GO:0005764,GO:0005768,GO:0005770,GO:0005773,GO:0005774,GO:0005794,GO:0005811,GO:0006605,GO:0006622,GO:0006623,GO:0006810,GO:0006873,GO:0006885,GO:0006886,GO:0006906,GO:0006996,GO:0007034,GO:0007041,GO:0007165,GO:0007174,GO:0007264,GO:0008104,GO:…
g52054.t1	6mA	GO:0000166,GO:0000309,GO:0001882,GO:0001883,GO:0003674,GO:0003824,GO:0004515,GO:0005488,GO:0005524,GO:0006082,GO:0006139,GO:0006520,GO:0006531,GO:0006725,GO:0006732,GO:0006733,GO:0006753,GO:0006793,GO:0006796,GO:0006807,GO:0008150,GO:0008152,GO:0009058,GO:0009066,GO:0009108,GO:0009117,GO:0009165,GO:0009435,GO:0009987,GO:0016740,GO:0016772,GO:0016779,GO:0017076,GO:0018130,GO:0019355,GO:0019359,GO:…
g3476.t1	6mA	GO:0000166,GO:0000339,GO:0000340,GO:0002252,GO:0002376,GO:0003674,GO:0003676,GO:0003723,GO:0003729,GO:0005488,GO:0005575,GO:0005634,GO:0005737,GO:0006139,GO:0006370,GO:0006396,GO:0006397,GO:0006725,GO:0006807,GO:0006810,GO:0006950,GO:0006952,GO:0008150,GO:0008152,GO:0009452,GO:0009605,GO:0009607,GO:0009615,GO:0009987,GO:0015931,GO:0016070,GO:0016071,GO:0032991,GO:0034518,GO:0034641,GO:0036094,GO:…
g10598.t1	6mA	GO:0000166,GO:0000381,GO:0003674,GO:0003676,GO:0003723,GO:0003729,GO:0005488,GO:0005575,GO:0005634,GO:0005737,GO:0006139,GO:0006396,GO:0006397,GO:0006725,GO:0006807,GO:0008150,GO:0008152,GO:0008380,GO:0009987,GO:0010468,GO:0016070,GO:0016071,GO:0019219,GO:0019222,GO:0031323,GO:0034641,GO:0036094,GO:0043170,GO:0043226,GO:0043227,GO:0043229,GO:0043231,GO:0043484,GO:0044237,GO:0044238,GO:0044260,GO:…
g50115.t1	6mA	GO:0000166,GO:0000422,GO:0001882,GO:0001883,GO:0003674,GO:0003824,GO:0004430,GO:0005488,GO:0005524,GO:0005575,GO:0005622,GO:0005886,GO:0006629,GO:0006644,GO:0006650,GO:0006793,GO:0006796,GO:0006914,GO:0006950,GO:0006996,GO:0007005,GO:0007010,GO:0007154,GO:0007165,GO:0008150,GO:0008152,GO:0009056,GO:0009267,GO:0009605,GO:0009987,GO:0009991,GO:0016020,GO:0016043,GO:0016236,GO:0016301,GO:0016310,GO:…
g28862.t1	6mA	GO:0000166,GO:0000578,GO:0001756,GO:0001882,GO:0001883,GO:0002009,GO:0003002,GO:0003674,GO:0005488,GO:0005525,GO:0005575,GO:0005829,GO:0005886,GO:0005911,GO:0007165,GO:0007264,GO:0007389,GO:0007507,GO:0008150,GO:0009653,GO:0009798,GO:0009880,GO:0009948,GO:0009952,GO:0016020,GO:0017076,GO:0019001,GO:0030054,GO:0032501,GO:0032502,GO:0032525,GO:0032549,GO:0032550,GO:0032553,GO:0032555,GO:0032561,GO:…
g67305.t1	6mA	GO:0000166,GO:0000733,GO:0001882,GO:0001883,GO:0003674,GO:0003676,GO:0003677,GO:0003678,GO:0003824,GO:0004003,GO:0004386,GO:0005488,GO:0005524,GO:0005575,GO:0005634,GO:0005654,GO:0006139,GO:0006259,GO:0006281,GO:0006310,GO:0006725,GO:0006807,GO:0006950,GO:0006974,GO:0006996,GO:0008026,GO:0008094,GO:0008150,GO:0008152,GO:0009987,GO:0016020,GO:0016043,GO:0016462,GO:0016787,GO:0016817,GO:0016818,GO:…
g70521.t1	6mA	GO:0000166,GO:0000768,GO:0001558,GO:0001667,GO:0001882,GO:0001883,GO:0002682,GO:0002791,GO:0002792,GO:0003006,GO:0003674,GO:0003824,GO:0004672,GO:0004674,GO:0005488,GO:0005524,GO:0005543,GO:0005575,GO:0005737,GO:0005829,GO:0005886,GO:0006464,GO:0006468,GO:0006629,GO:0006793,GO:0006796,GO:0006915,GO:0006928,GO:0006949,GO:0006950,GO:0006979,GO:0007165,GO:0007166,GO:0007167,GO:0007169,GO:0007276,GO:…
g52214.t1	6mA	GO:0000166,GO:0000902,GO:0000904,GO:0001101,GO:0001525,GO:0001569,GO:0001570,GO:0001763,GO:0001817,GO:0001819,GO:0001882,GO:0001883,GO:0001932,GO:0001934,GO:0001935,GO:0001936,GO:0001952,GO:0001954,GO:0002009,GO:0002040,GO:0002682,GO:0002684,GO:0002697,GO:0002699,GO:0002700,GO:0002702,GO:0002718,GO:0002720,GO:0002739,GO:0002741,GO:0003674,GO:0003824,GO:0004672,GO:0004713,GO:0004714,GO:0004871,GO:…
g55786.t1	6mA	GO:0000166,GO:0000902,GO:0000904,GO:0001101,GO:0001525,GO:0001569,GO:0001570,GO:0001763,GO:0001817,GO:0001819,GO:0001882,GO:0001883,GO:0001932,GO:0001934,GO:0001935,GO:0001936,GO:0001952,GO:0001954,GO:0002009,GO:0002040,GO:0002682,GO:0002684,GO:0002697,GO:0002699,GO:0002700,GO:0002702,GO:0002718,GO:0002720,GO:0002739,GO:0002741,GO:0003674,GO:0003824,GO:0004672,GO:0004713,GO:0004714,GO:0004871,GO:…
g19535.t1	6mA	GO:0000166,GO:0000902,GO:0000904,GO:0001882,GO:0001883,GO:0001947,GO:0002009,GO:0003002,GO:0003143,GO:0003674,GO:0005488,GO:0005525,GO:0005575,GO:0005929,GO:0005930,GO:0006928,GO:0006996,GO:0007165,GO:0007166,GO:0007224,GO:0007264,GO:0007389,GO:0008150,GO:0009653,GO:0009798,GO:0009953,GO:0009987,GO:0010927,GO:0016020,GO:0016043,GO:0016477,GO:0017076,GO:0019001,GO:0021532,GO:0021826,GO:0021830,GO:…
g66040.t1	6mA	GO:0000166,GO:0000902,GO:0001882,GO:0001883,GO:0001932,GO:0001934,GO:0001948,GO:0003674,GO:0003824,GO:0005488,GO:0005515,GO:0005524,GO:0005575,GO:0005576,GO:0005634,GO:0005739,GO:0005783,GO:0005788,GO:0005789,GO:0005790,GO:0005793,GO:0005886,GO:0005912,GO:0005924,GO:0005925,GO:0006508,GO:0006810,GO:0006950,GO:0006983,GO:0006984,GO:0006987,GO:0007154,GO:0007165,GO:0008150,GO:0008152,GO:0008180,GO:…
g62397.t1	6mA	GO:0000166,GO:0000902,GO:0001882,GO:0001883,GO:0003674,GO:0005488,GO:0005524,GO:0006457,GO:0008150,GO:0008152,GO:0009653,GO:0009987,GO:0016043,GO:0017076,GO:0019538,GO:0030554,GO:0032502,GO:0032549,GO:0032550,GO:0032553,GO:0032555,GO:0032559,GO:0032989,GO:0035639,GO:0036094,GO:0043167,GO:0043168,GO:0043170,GO:0044237,GO:0044238,GO:0044260,GO:0044267,GO:0044699,GO:0044763,GO:0044767,GO:0048869,GO:…
g8586.t1	6mA	GO:0000166,GO:0000932,GO:0001882,GO:0001883,GO:0003006,GO:0003674,GO:0003676,GO:0003723,GO:0003724,GO:0003824,GO:0004004,GO:0004386,GO:0005488,GO:0005524,GO:0005575,GO:0006139,GO:0006417,GO:0006725,GO:0006807,GO:0006915,GO:0006996,GO:0007276,GO:0007281,GO:0007283,GO:0007292,GO:0008026,GO:0008150,GO:0008152,GO:0008186,GO:0008219,GO:0008340,GO:0009889,GO:0009890,GO:0009892,GO:0009987,GO:0010468,GO:…
g22528.t1	6mA	GO:0000166,GO:0000988,GO:0000989,GO:0001076,GO:0001083,GO:0001129,GO:0001132,GO:0001882,GO:0001883,GO:0003674,GO:0003676,GO:0003677,GO:0003824,GO:0004402,GO:0004672,GO:0004674,GO:0005488,GO:0005515,GO:0005524,GO:0005575,GO:0005634,GO:0005654,GO:0005667,GO:0005669,GO:0005730,GO:0006139,GO:0006325,GO:0006352,GO:0006355,GO:0006357,GO:0006367,GO:0006464,GO:0006468,GO:0006473,GO:0006475,GO:0006725,GO:…
g38976.t1	6mA	GO:0000166,GO:0000988,GO:0000989,GO:0001882,GO:0001883,GO:0003674,GO:0003676,GO:0003677,GO:0003712,GO:0003824,GO:0004386,GO:0005488,GO:0005515,GO:0005524,GO:0005575,GO:0005634,GO:0006355,GO:0006357,GO:0008150,GO:0009889,GO:0009891,GO:0009893,GO:0010468,GO:0010556,GO:0010557,GO:0010604,GO:0010628,GO:0016462,GO:0016604,GO:0016607,GO:0016787,GO:0016817,GO:0016818,GO:0016887,GO:0017076,GO:0017111,GO:…
g50551.t1	6mA	GO:0000166,GO:0000988,GO:0000989,GO:0001882,GO:0001883,GO:0003674,GO:0003676,GO:0003712,GO:0003714,GO:0003723,GO:0003724,GO:0003824,GO:0004004,GO:0004386,GO:0005102,GO:0005488,GO:0005515,GO:0005524,GO:0005575,GO:0005634,GO:0005730,GO:0006139,GO:0006351,GO:0006355,GO:0006396,GO:0006725,GO:0006807,GO:0008026,GO:0008150,GO:0008152,GO:0008186,GO:0009058,GO:0009059,GO:0009889,GO:0009890,GO:0009892,GO:…
g68941.t1	6mA	GO:0000166,GO:0001101,GO:0001882,GO:0001883,GO:0003674,GO:0003824,GO:0005215,GO:0005488,GO:0005524,GO:0005575,GO:0005886,GO:0006810,GO:0006869,GO:0006950,GO:0006970,GO:0008150,GO:0008152,GO:0009058,GO:0009628,GO:0009651,GO:0009719,GO:0009725,GO:0009737,GO:0009987,GO:0010025,GO:0010033,GO:0010166,GO:0015399,GO:0015405,GO:0016020,GO:0016021,GO:0016462,GO:0016787,GO:0016817,GO:0016818,GO:0016820,GO:…
g64137.t1	6mA	GO:0000166,GO:0001101,GO:0001882,GO:0001883,GO:0003674,GO:0003824,GO:0005215,GO:0005488,GO:0005524,GO:0005575,GO:0005887,GO:0005911,GO:0006810,GO:0006811,GO:0006820,GO:0006855,GO:0006869,GO:0006873,GO:0006950,GO:0006979,GO:0008150,GO:0008509,GO:0008514,GO:0009266,GO:0009408,GO:0009628,GO:0009719,GO:0009725,GO:0009914,GO:0009986,GO:0009987,GO:0010033,GO:0010243,GO:0010817,GO:0014070,GO:0015075,GO:…
g29391.t1	6mA	GO:0000166,GO:0001505,GO:0001882,GO:0001883,GO:0003674,GO:0003824,GO:0005488,GO:0005524,GO:0005575,GO:0005794,GO:0006810,GO:0006836,GO:0007269,GO:0008021,GO:0008150,GO:0009987,GO:0016023,GO:0017076,GO:0023061,GO:0030054,GO:0030554,GO:0031410,GO:0031982,GO:0031988,GO:0032549,GO:0032550,GO:0032553,GO:0032555,GO:0032559,GO:0032940,GO:0035639,GO:0036094,GO:0043167,GO:0043168,GO:0043226,GO:0043227,GO:…
g18886.t1	6mA	GO:0000166,GO:0001525,GO:0001882,GO:0001883,GO:0001936,GO:0001938,GO:0002682,GO:0002684,GO:0002761,GO:0002763,GO:0002831,GO:0002833,GO:0003674,GO:0003824,GO:0004672,GO:0004674,GO:0004697,GO:0005488,GO:0005515,GO:0005524,GO:0005575,GO:0005634,GO:0005737,GO:0005829,GO:0005886,GO:0006464,GO:0006468,GO:0006793,GO:0006796,GO:0006915,GO:0007155,GO:0007165,GO:0007346,GO:0008150,GO:0008152,GO:0008219,GO:…
g68911.t1	6mA	GO:0000166,GO:0001558,GO:0001664,GO:0001882,GO:0001883,GO:0003674,GO:0003824,GO:0004672,GO:0004871,GO:0004872,GO:0004888,GO:0005102,GO:0005109,GO:0005488,GO:0005515,GO:0005524,GO:0005575,GO:0005634,GO:0005737,GO:0005886,GO:0006928,GO:0006935,GO:0007165,GO:0007166,GO:0007409,GO:0007411,GO:0008150,GO:0009653,GO:0009887,GO:0009893,GO:0009966,GO:0009967,GO:0009987,GO:0010562,GO:0010646,GO:0010647,GO:…
g71400.t1	6mA	GO:0000166,GO:0001653,GO:0001882,GO:0001883,GO:0003008,GO:0003013,GO:0003018,GO:0003674,GO:0003824,GO:0004383,GO:0004672,GO:0004871,GO:0004872,GO:0005488,GO:0005524,GO:0005525,GO:0005575,GO:0005886,GO:0006139,GO:0006140,GO:0006163,GO:0006164,GO:0006182,GO:0006464,GO:0006468,GO:0006584,GO:0006725,GO:0006753,GO:0006793,GO:0006796,GO:0006807,GO:0007165,GO:0007166,GO:0007167,GO:0007168,GO:0008074,GO:…
g50311.t1	6mA	GO:0000166,GO:0001654,GO:0001882,GO:0001883,GO:0003002,GO:0003006,GO:0003008,GO:0003674,GO:0003824,GO:0004672,GO:0004674,GO:0004690,GO:0004691,GO:0005488,GO:0005524,GO:0005575,GO:0005737,GO:0005886,GO:0005952,GO:0006355,GO:0006464,GO:0006468,GO:0006793,GO:0006796,GO:0007017,GO:0007165,GO:0007228,GO:0007276,GO:0007281,GO:0007292,GO:0007309,GO:0007314,GO:0007317,GO:0007389,GO:0007423,GO:0007447,GO:…
g40915.t1	6mA	GO:0000166,GO:0001676,GO:0001882,GO:0001883,GO:0003674,GO:0003824,GO:0004467,GO:0005488,GO:0005515,GO:0005524,GO:0005575,GO:0005741,GO:0005778,GO:0005789,GO:0005886,GO:0006082,GO:0006629,GO:0006631,GO:0006637,GO:0006638,GO:0006639,GO:0006641,GO:0006732,GO:0006790,GO:0006793,GO:0008150,GO:0008152,GO:0008610,GO:0009058,GO:0009108,GO:0009987,GO:0015645,GO:0016020,GO:0016021,GO:0016874,GO:0016877,GO:…
g11663.t1	6mA	GO:0000166,GO:0001708,GO:0001709,GO:0001882,GO:0001883,GO:0003674,GO:0005102,GO:0005112,GO:0005488,GO:0005515,GO:0005524,GO:0005575,GO:0005634,GO:0005737,GO:0005938,GO:0006928,GO:0007165,GO:0007166,GO:0007219,GO:0007400,GO:0007405,GO:0007417,GO:0007419,GO:0007422,GO:0007507,GO:0007610,GO:0007622,GO:0008104,GO:0008150,GO:0008283,GO:0008347,GO:0008356,GO:0008593,GO:0009786,GO:0009888,GO:0009966,GO:…
g36103.t1	6mA	GO:0000166,GO:0001708,GO:0001709,GO:0001882,GO:0001883,GO:0003674,GO:0005102,GO:0005112,GO:0005488,GO:0005515,GO:0005524,GO:0005575,GO:0005634,GO:0005737,GO:0005938,GO:0006928,GO:0007165,GO:0007166,GO:0007219,GO:0007400,GO:0007405,GO:0007417,GO:0007419,GO:0007422,GO:0007507,GO:0007610,GO:0007622,GO:0008104,GO:0008150,GO:0008283,GO:0008347,GO:0008356,GO:0008593,GO:0009786,GO:0009888,GO:0009966,GO:…
g17864.t1	6mA	GO:0000166,GO:0001726,GO:0001882,GO:0001883,GO:0003674,GO:0003824,GO:0003924,GO:0005488,GO:0005525,GO:0005575,GO:0005829,GO:0005886,GO:0006810,GO:0006897,GO:0007165,GO:0007264,GO:0008104,GO:0008150,GO:0010008,GO:0015031,GO:0016020,GO:0016023,GO:0016192,GO:0016462,GO:0016787,GO:0016817,GO:0016818,GO:0017076,GO:0017111,GO:0019001,GO:0019003,GO:0031090,GO:0031410,GO:0031901,GO:0031982,GO:0031988,GO:…
g68249.t1	6mA	GO:0000166,GO:0001775,GO:0001816,GO:0001865,GO:0001882,GO:0001883,GO:0002250,GO:0002253,GO:0002376,GO:0002429,GO:0002521,GO:0002682,GO:0002684,GO:0002757,GO:0002764,GO:0002768,GO:0003674,GO:0003824,GO:0004672,GO:0004713,GO:0004715,GO:0005488,GO:0005524,GO:0005575,GO:0005829,GO:0005911,GO:0006464,GO:0006468,GO:0006793,GO:0006796,GO:0006950,GO:0006952,GO:0006955,GO:0007155,GO:0007159,GO:0007165,GO:…
g32846.t1	6mA	GO:0000166,GO:0001775,GO:0001817,GO:0001818,GO:0001882,GO:0001883,GO:0002237,GO:0002376,GO:0003674,GO:0005488,GO:0005515,GO:0005524,GO:0005575,GO:0005737,GO:0006355,GO:0007155,GO:0007159,GO:0007165,GO:0007249,GO:0008150,GO:0009605,GO:0009607,GO:0009889,GO:0009966,GO:0009968,GO:0009987,GO:0010033,GO:0010468,GO:0010556,GO:0010646,GO:0010648,GO:0016337,GO:0017076,GO:0019219,GO:0019222,GO:0022610,GO:…
g70743.t1	6mA	GO:0000166,GO:0001882,GO:0001883,GO:0001887,GO:0003674,GO:0003824,GO:0005488,GO:0005524,GO:0006082,GO:0006520,GO:0006541,GO:0006575,GO:0006807,GO:0006996,GO:0007005,GO:0007049,GO:0007444,GO:0008150,GO:0008152,GO:0008283,GO:0008284,GO:0008652,GO:0009058,GO:0009064,GO:0009069,GO:0009070,GO:0009888,GO:0009892,GO:0009987,GO:0016043,GO:0016053,GO:0016259,GO:0016260,GO:0016301,GO:0016740,GO:0016772,GO:…
g55877.t1	6mA	GO:0000166,GO:0001882,GO:0001883,GO:0001932,GO:0001934,GO:0002376,GO:0003674,GO:0003824,GO:0004672,GO:0004674,GO:0004712,GO:0004713,GO:0004715,GO:0005102,GO:0005154,GO:0005488,GO:0005515,GO:0005524,GO:0005575,GO:0005634,GO:0005737,GO:0005768,GO:0005886,GO:0005905,GO:0005912,GO:0006464,GO:0006468,GO:0006521,GO:0006793,GO:0006796,GO:0006810,GO:0006897,GO:0006928,GO:0006950,GO:0006952,GO:0006955,GO:…
g61738.t1	6mA	GO:0000166,GO:0001882,GO:0001883,GO:0001932,GO:0001934,GO:0003674,GO:0005488,GO:0005525,GO:0005575,GO:0005622,GO:0005886,GO:0005912,GO:0007165,GO:0007264,GO:0007275,GO:0008150,GO:0009893,GO:0010562,GO:0010604,GO:0016020,GO:0017076,GO:0019001,GO:0019220,GO:0019222,GO:0030054,GO:0031323,GO:0031325,GO:0031399,GO:0031401,GO:0032268,GO:0032270,GO:0032501,GO:0032502,GO:0032549,GO:0032550,GO:0032553,GO:…
g72184.t1	6mA	GO:0000166,GO:0001882,GO:0001883,GO:0001952,GO:0002376,GO:0003674,GO:0003824,GO:0004672,GO:0004674,GO:0005488,GO:0005524,GO:0005575,GO:0005737,GO:0005794,GO:0006464,GO:0006468,GO:0006793,GO:0006796,GO:0006950,GO:0006996,GO:0007010,GO:0007154,GO:0007165,GO:0007267,GO:0007268,GO:0007275,GO:0007346,GO:0008150,GO:0008152,GO:0009653,GO:0009893,GO:0009966,GO:0009967,GO:0009987,GO:0010469,GO:0010562,GO:…
g31068.t1	6mA	GO:0000166,GO:0001882,GO:0001883,GO:0002009,GO:0003674,GO:0003824,GO:0004672,GO:0004674,GO:0004697,GO:0005488,GO:0005524,GO:0005575,GO:0005634,GO:0005737,GO:0005829,GO:0005856,GO:0006139,GO:0006351,GO:0006355,GO:0006464,GO:0006468,GO:0006725,GO:0006793,GO:0006796,GO:0006807,GO:0006996,GO:0007010,GO:0007049,GO:0007155,GO:0007165,GO:0007391,GO:0007472,GO:0007560,GO:0008150,GO:0008152,GO:0009058,GO:…
g54559.t1	6mA	GO:0000166,GO:0001882,GO:0001883,GO:0002097,GO:0002098,GO:0002143,GO:0003674,GO:0003824,GO:0004792,GO:0005488,GO:0005524,GO:0005575,GO:0005829,GO:0006139,GO:0006399,GO:0006400,GO:0006464,GO:0006725,GO:0006732,GO:0006777,GO:0006793,GO:0006796,GO:0006807,GO:0008033,GO:0008150,GO:0008152,GO:0008641,GO:0009058,GO:0009108,GO:0009451,GO:0009987,GO:0016070,GO:0016740,GO:0016772,GO:0016779,GO:0016782,GO:…
g39199.t1	6mA	GO:0000166,GO:0001882,GO:0001883,GO:0002250,GO:0002376,GO:0003674,GO:0003824,GO:0004672,GO:0004713,GO:0004715,GO:0005488,GO:0005524,GO:0005575,GO:0005634,GO:0005737,GO:0006139,GO:0006351,GO:0006355,GO:0006464,GO:0006468,GO:0006725,GO:0006793,GO:0006796,GO:0006807,GO:0006950,GO:0006952,GO:0006955,GO:0007165,GO:0007166,GO:0007167,GO:0007169,GO:0008150,GO:0008152,GO:0008289,GO:0009058,GO:0009059,GO:…
g4960.t1	6mA	GO:0000166,GO:0001882,GO:0001883,GO:0003006,GO:0003674,GO:0003676,GO:0003723,GO:0003724,GO:0003824,GO:0004004,GO:0004386,GO:0005488,GO:0005524,GO:0005575,GO:0005634,GO:0005737,GO:0006139,GO:0006405,GO:0006406,GO:0006417,GO:0006725,GO:0006807,GO:0006810,GO:0006913,GO:0007275,GO:0007281,GO:0007286,GO:0008026,GO:0008150,GO:0008152,GO:0008186,GO:0009889,GO:0009987,GO:0010468,GO:0010501,GO:0010556,GO:…
g6293.t1	6mA	GO:0000166,GO:0001882,GO:0001883,GO:0003006,GO:0003674,GO:0003824,GO:0004175,GO:0004197,GO:0004198,GO:0004672,GO:0004674,GO:0005488,GO:0005524,GO:0005575,GO:0005622,GO:0005634,GO:0005737,GO:0006464,GO:0006468,GO:0006508,GO:0006793,GO:0006796,GO:0006915,GO:0006928,GO:0006935,GO:0007162,GO:0007165,GO:0008150,GO:0008152,GO:0008219,GO:0008233,GO:0008234,GO:0008283,GO:0009719,GO:0009987,GO:0010033,GO:…
g60803.t1	6mA	GO:0000166,GO:0001882,GO:0001883,GO:0003008,GO:0003674,GO:0003774,GO:0003824,GO:0005488,GO:0005515,GO:0005524,GO:0005575,GO:0005737,GO:0005856,GO:0006928,GO:0007600,GO:0007605,GO:0008092,GO:0008150,GO:0008407,GO:0009653,GO:0009886,GO:0009887,GO:0009987,GO:0016043,GO:0016459,GO:0016462,GO:0016787,GO:0016817,GO:0016818,GO:0016887,GO:0017022,GO:0017076,GO:0017111,GO:0030029,GO:0030030,GO:0030048,GO:…
g27360.t1	6mA	GO:0000166,GO:0001882,GO:0001883,GO:0003674,GO:0003676,GO:0003677,GO:0003723,GO:0003724,GO:0003824,GO:0004004,GO:0004386,GO:0005488,GO:0005524,GO:0005575,GO:0005730,GO:0005794,GO:0006139,GO:0006725,GO:0006807,GO:0008026,GO:0008150,GO:0008152,GO:0008186,GO:0009987,GO:0010501,GO:0016070,GO:0016462,GO:0016787,GO:0016817,GO:0016818,GO:0016887,GO:0017076,GO:0017111,GO:0022613,GO:0030554,GO:0032549,GO:…
g46207.t1	6mA	GO:0000166,GO:0001882,GO:0001883,GO:0003674,GO:0003676,GO:0003677,GO:0005488,GO:0005524,GO:0005575,GO:0005634,GO:0005737,GO:0005813,GO:0005815,GO:0008150,GO:0008152,GO:0009058,GO:0016043,GO:0016226,GO:0017076,GO:0022607,GO:0030554,GO:0031163,GO:0031616,GO:0032549,GO:0032550,GO:0032553,GO:0032555,GO:0032559,GO:0035639,GO:0036094,GO:0043167,GO:0043168,GO:0043169,GO:0043226,GO:0043227,GO:0043228,GO:…
g36132.t1	6mA	GO:0000166,GO:0001882,GO:0001883,GO:0003674,GO:0003676,GO:0003723,GO:0003746,GO:0003824,GO:0003924,GO:0005488,GO:0005525,GO:0005575,GO:0005622,GO:0006414,GO:0008135,GO:0008150,GO:0008152,GO:0009058,GO:0009059,GO:0009987,GO:0016462,GO:0016787,GO:0016817,GO:0016818,GO:0017076,GO:0017111,GO:0019001,GO:0032549,GO:0032550,GO:0032553,GO:0032555,GO:0032561,GO:0034645,GO:0035639,GO:0036094,GO:0043167,GO:…
g8752.t1	6mA	GO:0000166,GO:0001882,GO:0001883,GO:0003674,GO:0003676,GO:0003824,GO:0005488,GO:0005524,GO:0005575,GO:0005635,GO:0005654,GO:0005737,GO:0005840,GO:0006413,GO:0006417,GO:0008150,GO:0008152,GO:0008494,GO:0009889,GO:0009891,GO:0009893,GO:0009987,GO:0010468,GO:0010556,GO:0010557,GO:0010604,GO:0010608,GO:0010628,GO:0016462,GO:0016787,GO:0016817,GO:0016818,GO:0016887,GO:0017076,GO:0017111,GO:0019222,GO:…
g73457.t1	6mA	GO:0000166,GO:0001882,GO:0001883,GO:0003674,GO:0003774,GO:0003777,GO:0003824,GO:0005488,GO:0005515,GO:0005524,GO:0005575,GO:0005737,GO:0005871,GO:0005874,GO:0005875,GO:0006928,GO:0007017,GO:0007018,GO:0008017,GO:0008092,GO:0008150,GO:0009987,GO:0015631,GO:0016462,GO:0016787,GO:0016817,GO:0016818,GO:0016887,GO:0017076,GO:0017111,GO:0030554,GO:0031982,GO:0031988,GO:0032403,GO:0032549,GO:0032550,GO:…
g71539.t1	6mA	GO:0000166,GO:0001882,GO:0001883,GO:0003674,GO:0003774,GO:0003777,GO:0003824,GO:0005488,GO:0005515,GO:0005524,GO:0005575,GO:0005737,GO:0005871,GO:0005874,GO:0005875,GO:0006928,GO:0007017,GO:0007018,GO:0008017,GO:0008092,GO:0008150,GO:0009987,GO:0015631,GO:0016462,GO:0016787,GO:0016817,GO:0016818,GO:0016887,GO:0017076,GO:0017111,GO:0030554,GO:0032403,GO:0032549,GO:0032550,GO:0032553,GO:0032555,GO:…
g54383.t1	6mA	GO:0000166,GO:0001882,GO:0001883,GO:0003674,GO:0003774,GO:0003777,GO:0003824,GO:0005488,GO:0005524,GO:0005575,GO:0005737,GO:0005874,GO:0005875,GO:0005929,GO:0006928,GO:0007017,GO:0007018,GO:0008150,GO:0009987,GO:0016462,GO:0016787,GO:0016817,GO:0016818,GO:0016887,GO:0017076,GO:0017111,GO:0030286,GO:0030554,GO:0032549,GO:0032550,GO:0032553,GO:0032555,GO:0032559,GO:0032991,GO:0035639,GO:0036094,GO:…
g70508.t1	6mA	GO:0000166,GO:0001882,GO:0001883,GO:0003674,GO:0003774,GO:0003824,GO:0005488,GO:0005515,GO:0005524,GO:0005575,GO:0016459,GO:0016462,GO:0016787,GO:0016817,GO:0016818,GO:0017076,GO:0017111,GO:0030016,GO:0030554,GO:0032549,GO:0032550,GO:0032553,GO:0032555,GO:0032559,GO:0032982,GO:0032991,GO:0035639,GO:0036094,GO:0043167,GO:0043168,GO:0043226,GO:0043228,GO:0043229,GO:0043232,GO:0043234,GO:0043292,GO:…
g63189.t1	6mA	GO:0000166,GO:0001882,GO:0001883,GO:0003674,GO:0003824,GO:0003878,GO:0005488,GO:0005524,GO:0005575,GO:0005654,GO:0005739,GO:0005886,GO:0006082,GO:0006084,GO:0006085,GO:0006101,GO:0006629,GO:0006637,GO:0006732,GO:0006790,GO:0006793,GO:0008150,GO:0008152,GO:0008610,GO:0009058,GO:0009108,GO:0009987,GO:0016020,GO:0016740,GO:0016746,GO:0017076,GO:0019752,GO:0030554,GO:0031982,GO:0031988,GO:0032549,GO:…
g9525.t1	6mA	GO:0000166,GO:0001882,GO:0001883,GO:0003674,GO:0003824,GO:0003924,GO:0004871,GO:0005488,GO:0005515,GO:0005525,GO:0007165,GO:0007166,GO:0007186,GO:0007187,GO:0007188,GO:0008150,GO:0016462,GO:0016787,GO:0016817,GO:0016818,GO:0017076,GO:0017111,GO:0019001,GO:0031683,GO:0032403,GO:0032549,GO:0032550,GO:0032553,GO:0032555,GO:0032561,GO:0035639,GO:0036094,GO:0043167,GO:0043168,GO:0043169,GO:0044877,GO:…
g67354.t1	6mA	GO:0000166,GO:0001882,GO:0001883,GO:0003674,GO:0003824,GO:0003924,GO:0005198,GO:0005200,GO:0005488,GO:0005525,GO:0005575,GO:0005737,GO:0005874,GO:0007017,GO:0008150,GO:0009987,GO:0016462,GO:0016787,GO:0016817,GO:0016818,GO:0017076,GO:0017111,GO:0019001,GO:0032549,GO:0032550,GO:0032553,GO:0032555,GO:0032561,GO:0032991,GO:0035639,GO:0036094,GO:0043167,GO:0043168,GO:0043234,GO:0044422,GO:0044424,GO:…
g55754.t1	6mA	GO:0000166,GO:0001882,GO:0001883,GO:0003674,GO:0003824,GO:0003924,GO:0005488,GO:0005525,GO:0005575,GO:0005622,GO:0005743,GO:0006412,GO:0008150,GO:0008152,GO:0009058,GO:0009059,GO:0009987,GO:0016020,GO:0016462,GO:0016787,GO:0016817,GO:0016818,GO:0017076,GO:0017111,GO:0019001,GO:0019538,GO:0019866,GO:0031090,GO:0031966,GO:0032549,GO:0032550,GO:0032553,GO:0032555,GO:0032561,GO:0034645,GO:0035639,GO:…
g42386.t1	6mA	GO:0000166,GO:0001882,GO:0001883,GO:0003674,GO:0003824,GO:0003924,GO:0005488,GO:0005525,GO:0005575,GO:0005634,GO:0005737,GO:0016462,GO:0016787,GO:0016817,GO:0016818,GO:0017076,GO:0017111,GO:0019001,GO:0032549,GO:0032550,GO:0032553,GO:0032555,GO:0032561,GO:0035639,GO:0036094,GO:0043167,GO:0043168,GO:0043226,GO:0043227,GO:0043229,GO:0043231,GO:0044424,GO:0044464,GO:0097159,GO:0097367,GO:1901265,GO:…
g61895.t1	6mA	GO:0000166,GO:0001882,GO:0001883,GO:0003674,GO:0003824,GO:0003924,GO:0005488,GO:0005525,GO:0005575,GO:0005634,GO:0006810,GO:0006886,GO:0006913,GO:0007165,GO:0007264,GO:0008104,GO:0008150,GO:0015031,GO:0016462,GO:0016482,GO:0016787,GO:0016817,GO:0016818,GO:0017076,GO:0017111,GO:0019001,GO:0032549,GO:0032550,GO:0032553,GO:0032555,GO:0032561,GO:0033036,GO:0035556,GO:0035639,GO:0036094,GO:0043167,GO:…
g37910.t1	6mA	GO:0000166,GO:0001882,GO:0001883,GO:0003674,GO:0003824,GO:0003956,GO:0004672,GO:0004674,GO:0005488,GO:0005515,GO:0005524,GO:0005575,GO:0005576,GO:0005618,GO:0005829,GO:0005886,GO:0005887,GO:0005975,GO:0006464,GO:0006471,GO:0006486,GO:0006950,GO:0007154,GO:0008150,GO:0008152,GO:0009267,GO:0009405,GO:0009605,GO:0009889,GO:0009890,GO:0009892,GO:0009893,GO:0009987,GO:0009991,GO:0010565,GO:0016020,GO:…
g44975.t1	6mA	GO:0000166,GO:0001882,GO:0001883,GO:0003674,GO:0003824,GO:0004305,GO:0005488,GO:0005524,GO:0006629,GO:0006644,GO:0006646,GO:0006650,GO:0006793,GO:0006796,GO:0008150,GO:0008152,GO:0008610,GO:0008654,GO:0009058,GO:0009987,GO:0016301,GO:0016740,GO:0016772,GO:0016773,GO:0017076,GO:0019637,GO:0030554,GO:0032549,GO:0032550,GO:0032553,GO:0032555,GO:0032559,GO:0035639,GO:0036094,GO:0043167,GO:0043168,GO:…
g3393.t1	6mA	GO:0000166,GO:0001882,GO:0001883,GO:0003674,GO:0003824,GO:0004383,GO:0004672,GO:0005488,GO:0005515,GO:0005524,GO:0005525,GO:0005575,GO:0005886,GO:0006139,GO:0006163,GO:0006164,GO:0006182,GO:0006464,GO:0006468,GO:0006725,GO:0006753,GO:0006793,GO:0006796,GO:0006807,GO:0007165,GO:0007166,GO:0007167,GO:0007168,GO:0008074,GO:0008150,GO:0008152,GO:0009058,GO:0009117,GO:0009150,GO:0009152,GO:0009165,GO:…
g29955.t1	6mA	GO:0000166,GO:0001882,GO:0001883,GO:0003674,GO:0003824,GO:0004672,GO:0004674,GO:0004683,GO:0005488,GO:0005509,GO:0005515,GO:0005516,GO:0005524,GO:0005575,GO:0005737,GO:0005886,GO:0006464,GO:0006468,GO:0006793,GO:0006796,GO:0007165,GO:0008150,GO:0008152,GO:0009738,GO:0009755,GO:0009931,GO:0009987,GO:0010857,GO:0016020,GO:0016301,GO:0016310,GO:0016740,GO:0016772,GO:0016773,GO:0017076,GO:0018105,GO:…
g70579.t1	6mA	GO:0000166,GO:0001882,GO:0001883,GO:0003674,GO:0003824,GO:0004672,GO:0004674,GO:0004702,GO:0004707,GO:0004871,GO:0005057,GO:0005488,GO:0005524,GO:0005575,GO:0005622,GO:0006139,GO:0006351,GO:0006355,GO:0006464,GO:0006468,GO:0006725,GO:0006793,GO:0006796,GO:0006807,GO:0007049,GO:0008150,GO:0008152,GO:0009058,GO:0009059,GO:0009889,GO:0009987,GO:0010468,GO:0010556,GO:0016070,GO:0016301,GO:0016310,GO:…
g68524.t1	6mA	GO:0000166,GO:0001882,GO:0001883,GO:0003674,GO:0003824,GO:0004672,GO:0004674,GO:0005085,GO:0005088,GO:0005089,GO:0005488,GO:0005524,GO:0005575,GO:0005737,GO:0008150,GO:0009966,GO:0010646,GO:0016301,GO:0016740,GO:0016772,GO:0016773,GO:0017076,GO:0023051,GO:0030554,GO:0032549,GO:0032550,GO:0032553,GO:0032555,GO:0032559,GO:0035023,GO:0035639,GO:0036094,GO:0043167,GO:0043168,GO:0044424,GO:0044464,GO:…
g68527.t1	6mA	GO:0000166,GO:0001882,GO:0001883,GO:0003674,GO:0003824,GO:0004672,GO:0004674,GO:0005085,GO:0005088,GO:0005089,GO:0005488,GO:0005524,GO:0005575,GO:0005737,GO:0008150,GO:0009966,GO:0010646,GO:0016301,GO:0016740,GO:0016772,GO:0016773,GO:0017076,GO:0023051,GO:0030554,GO:0032549,GO:0032550,GO:0032553,GO:0032555,GO:0032559,GO:0035023,GO:0035639,GO:0036094,GO:0043167,GO:0043168,GO:0044424,GO:0044464,GO:…
g15254.t1	6mA	GO:0000166,GO:0001882,GO:0001883,GO:0003674,GO:0003824,GO:0004672,GO:0004674,GO:0005085,GO:0005088,GO:0005089,GO:0005488,GO:0005524,GO:0005575,GO:0005829,GO:0005856,GO:0006464,GO:0006468,GO:0006793,GO:0006796,GO:0006810,GO:0006928,GO:0007165,GO:0007166,GO:0007167,GO:0007169,GO:0007264,GO:0007399,GO:0007411,GO:0008150,GO:0008152,GO:0009893,GO:0009966,GO:0009987,GO:0010646,GO:0010941,GO:0010942,GO:…
g34893.t1	6mA	GO:0000166,GO:0001882,GO:0001883,GO:0003674,GO:0003824,GO:0004672,GO:0004674,GO:0005215,GO:0005216,GO:0005261,GO:0005262,GO:0005488,GO:0005524,GO:0005575,GO:0006461,GO:0006810,GO:0006811,GO:0006812,GO:0008150,GO:0008324,GO:0009636,GO:0015075,GO:0015085,GO:0015267,GO:0016020,GO:0016021,GO:0016043,GO:0016301,GO:0016324,GO:0016740,GO:0016772,GO:0016773,GO:0017076,GO:0022607,GO:0022803,GO:0022838,GO:…
g62101.t1	6mA	GO:0000166,GO:0001882,GO:0001883,GO:0003674,GO:0003824,GO:0004672,GO:0004674,GO:0005488,GO:0005515,GO:0005524,GO:0005575,GO:0005576,GO:0005618,GO:0005829,GO:0005886,GO:0005887,GO:0006950,GO:0007154,GO:0008150,GO:0009267,GO:0009405,GO:0009605,GO:0009889,GO:0009890,GO:0009892,GO:0009893,GO:0009987,GO:0009991,GO:0010565,GO:0016020,GO:0016021,GO:0016036,GO:0016301,GO:0016740,GO:0016772,GO:0016773,GO:…
g70940.t1	6mA	GO:0000166,GO:0001882,GO:0001883,GO:0003674,GO:0003824,GO:0004672,GO:0004674,GO:0005488,GO:0005515,GO:0005524,GO:0005575,GO:0005576,GO:0005618,GO:0005829,GO:0005886,GO:0005887,GO:0006950,GO:0007154,GO:0008150,GO:0009267,GO:0009405,GO:0009605,GO:0009889,GO:0009890,GO:0009892,GO:0009893,GO:0009987,GO:0009991,GO:0010565,GO:0016020,GO:0016021,GO:0016036,GO:0016301,GO:0016740,GO:0016772,GO:0016773,GO:…
g16960.t1	6mA	GO:0000166,GO:0001882,GO:0001883,GO:0003674,GO:0003824,GO:0004672,GO:0004674,GO:0005488,GO:0005515,GO:0005524,GO:0005575,GO:0005737,GO:0006464,GO:0006468,GO:0006793,GO:0006796,GO:0006915,GO:0008150,GO:0008152,GO:0008219,GO:0009987,GO:0012501,GO:0016265,GO:0016301,GO:0016310,GO:0016740,GO:0016772,GO:0016773,GO:0017076,GO:0019538,GO:0030554,GO:0032549,GO:0032550,GO:0032553,GO:0032555,GO:0032559,GO:…
g50013.t1	6mA	GO:0000166,GO:0001882,GO:0001883,GO:0003674,GO:0003824,GO:0004672,GO:0004674,GO:0005488,GO:0005515,GO:0005524,GO:0005575,GO:0006464,GO:0006468,GO:0006793,GO:0006796,GO:0008150,GO:0008152,GO:0009987,GO:0016301,GO:0016310,GO:0016740,GO:0016772,GO:0016773,GO:0017076,GO:0018105,GO:0018107,GO:0018193,GO:0018209,GO:0018210,GO:0019538,GO:0030554,GO:0031672,GO:0032549,GO:0032550,GO:0032553,GO:0032555,GO:…
g46379.t1	6mA	GO:0000166,GO:0001882,GO:0001883,GO:0003674,GO:0003824,GO:0004672,GO:0004674,GO:0005488,GO:0005524,GO:0005575,GO:0005576,GO:0005618,GO:0005829,GO:0005886,GO:0005887,GO:0006950,GO:0007154,GO:0008150,GO:0009267,GO:0009405,GO:0009605,GO:0009889,GO:0009890,GO:0009892,GO:0009893,GO:0009987,GO:0009991,GO:0010565,GO:0016020,GO:0016021,GO:0016036,GO:0016301,GO:0016740,GO:0016772,GO:0016773,GO:0017076,GO:…
g7164.t1	6mA	GO:0000166,GO:0001882,GO:0001883,GO:0003674,GO:0003824,GO:0004672,GO:0004674,GO:0005488,GO:0005524,GO:0005575,GO:0005576,GO:0005618,GO:0005829,GO:0005886,GO:0005887,GO:0006950,GO:0007154,GO:0008150,GO:0009267,GO:0009405,GO:0009605,GO:0009889,GO:0009890,GO:0009892,GO:0009893,GO:0009987,GO:0009991,GO:0010565,GO:0016020,GO:0016021,GO:0016036,GO:0016301,GO:0016740,GO:0016772,GO:0016773,GO:0017076,GO:…
g33765.t1	6mA	GO:0000166,GO:0001882,GO:0001883,GO:0003674,GO:0003824,GO:0004672,GO:0004674,GO:0005488,GO:0005524,GO:0005575,GO:0005634,GO:0005737,GO:0005813,GO:0005815,GO:0006139,GO:0006259,GO:0006281,GO:0006464,GO:0006468,GO:0006725,GO:0006793,GO:0006796,GO:0006807,GO:0006950,GO:0006974,GO:0007165,GO:0007166,GO:0008150,GO:0008152,GO:0009987,GO:0016055,GO:0016301,GO:0016310,GO:0016740,GO:0016772,GO:0016773,GO:…
g65689.t1	6mA	GO:0000166,GO:0001882,GO:0001883,GO:0003674,GO:0003824,GO:0004672,GO:0004674,GO:0005488,GO:0005524,GO:0005575,GO:0005634,GO:0005737,GO:0005813,GO:0005815,GO:0006464,GO:0006468,GO:0006793,GO:0006796,GO:0006810,GO:0006897,GO:0006909,GO:0007165,GO:0007166,GO:0007346,GO:0008150,GO:0008152,GO:0009893,GO:0009894,GO:0009896,GO:0009987,GO:0010564,GO:0010604,GO:0016055,GO:0016192,GO:0016301,GO:0016310,GO:…
g31632.t1	6mA	GO:0000166,GO:0001882,GO:0001883,GO:0003674,GO:0003824,GO:0004672,GO:0004674,GO:0005488,GO:0005524,GO:0005575,GO:0005634,GO:0005737,GO:0005813,GO:0005815,GO:0006464,GO:0006468,GO:0006793,GO:0006796,GO:0007017,GO:0007059,GO:0008150,GO:0008152,GO:0009987,GO:0016301,GO:0016310,GO:0016740,GO:0016772,GO:0016773,GO:0017076,GO:0019538,GO:0030554,GO:0032549,GO:0032550,GO:0032553,GO:0032555,GO:0032559,GO:…
g35379.t1	6mA	GO:0000166,GO:0001882,GO:0001883,GO:0003674,GO:0003824,GO:0004672,GO:0004674,GO:0005488,GO:0005524,GO:0005575,GO:0005634,GO:0016301,GO:0016740,GO:0016772,GO:0016773,GO:0017076,GO:0030554,GO:0032549,GO:0032550,GO:0032553,GO:0032555,GO:0032559,GO:0035639,GO:0036094,GO:0043167,GO:0043168,GO:0043226,GO:0043227,GO:0043229,GO:0043231,GO:0044424,GO:0044464,GO:0097159,GO:0097367,GO:1901265,GO:1901363
g31711.t1	6mA	GO:0000166,GO:0001882,GO:0001883,GO:0003674,GO:0003824,GO:0004672,GO:0004713,GO:0004714,GO:0004871,GO:0004872,GO:0004888,GO:0005488,GO:0005515,GO:0005524,GO:0005575,GO:0005887,GO:0006464,GO:0006468,GO:0006793,GO:0006796,GO:0007165,GO:0007166,GO:0007167,GO:0007169,GO:0008150,GO:0008152,GO:0009987,GO:0016021,GO:0016055,GO:0016301,GO:0016310,GO:0016740,GO:0016772,GO:0016773,GO:0017076,GO:0017147,GO:…
g71509.t1	6mA	GO:0000166,GO:0001882,GO:0001883,GO:0003674,GO:0003824,GO:0004672,GO:0004713,GO:0004714,GO:0004871,GO:0004872,GO:0004888,GO:0005488,GO:0005524,GO:0005575,GO:0006464,GO:0006468,GO:0006793,GO:0006796,GO:0008150,GO:0008152,GO:0009987,GO:0016021,GO:0016301,GO:0016310,GO:0016740,GO:0016772,GO:0016773,GO:0017076,GO:0019199,GO:0019538,GO:0030554,GO:0031224,GO:0032549,GO:0032550,GO:0032553,GO:0032555,GO:…
g8634.t1	6mA	GO:0000166,GO:0001882,GO:0001883,GO:0003674,GO:0003824,GO:0004672,GO:0005488,GO:0005515,GO:0005524,GO:0005575,GO:0005938,GO:0006464,GO:0006468,GO:0006793,GO:0006796,GO:0006810,GO:0006888,GO:0008150,GO:0008152,GO:0009987,GO:0012505,GO:0016192,GO:0016301,GO:0016310,GO:0016482,GO:0016740,GO:0016772,GO:0016773,GO:0017076,GO:0019538,GO:0030554,GO:0032549,GO:0032550,GO:0032553,GO:0032555,GO:0032559,GO:…
g58172.t1	6mA	GO:0000166,GO:0001882,GO:0001883,GO:0003674,GO:0003824,GO:0005215,GO:0005391,GO:0005488,GO:0005524,GO:0005575,GO:0005886,GO:0005889,GO:0006810,GO:0006811,GO:0006812,GO:0006813,GO:0006814,GO:0006818,GO:0006873,GO:0006875,GO:0006883,GO:0006885,GO:0008150,GO:0008324,GO:0008556,GO:0008900,GO:0009987,GO:0010033,GO:0010035,GO:0010038,GO:0010107,GO:0010248,GO:0014070,GO:0015075,GO:0015077,GO:0015078,GO:…
g42674.t1	6mA	GO:0000166,GO:0001882,GO:0001883,GO:0003674,GO:0003824,GO:0005215,GO:0005391,GO:0005488,GO:0005524,GO:0005575,GO:0005886,GO:0008324,GO:0008556,GO:0015075,GO:0015077,GO:0015079,GO:0015081,GO:0015399,GO:0015405,GO:0015662,GO:0016020,GO:0016021,GO:0016462,GO:0016787,GO:0016817,GO:0016818,GO:0016820,GO:0016887,GO:0017076,GO:0017111,GO:0019829,GO:0022804,GO:0022857,GO:0022890,GO:0022891,GO:0022892,GO:…
g62616.t1	6mA	GO:0000166,GO:0001882,GO:0001883,GO:0003674,GO:0003824,GO:0005215,GO:0005488,GO:0005524,GO:0005575,GO:0005741,GO:0005743,GO:0005783,GO:0005794,GO:0005886,GO:0006810,GO:0006873,GO:0006875,GO:0006879,GO:0008150,GO:0009987,GO:0015399,GO:0015405,GO:0016020,GO:0016021,GO:0016462,GO:0016787,GO:0016817,GO:0016818,GO:0016820,GO:0016887,GO:0017076,GO:0017111,GO:0019725,GO:0019866,GO:0019867,GO:0022804,GO:…
g65691.t1	6mA	GO:0000166,GO:0001882,GO:0001883,GO:0003674,GO:0003824,GO:0005215,GO:0005488,GO:0005524,GO:0005575,GO:0005754,GO:0006139,GO:0006163,GO:0006164,GO:0006725,GO:0006753,GO:0006754,GO:0006793,GO:0006796,GO:0006807,GO:0006810,GO:0006811,GO:0006812,GO:0006818,GO:0006839,GO:0008150,GO:0008152,GO:0008324,GO:0009058,GO:0009116,GO:0009117,GO:0009119,GO:0009123,GO:0009124,GO:0009126,GO:0009127,GO:0009141,GO:…
g3676.t1	6mA	GO:0000166,GO:0001882,GO:0001883,GO:0003674,GO:0003824,GO:0005215,GO:0005488,GO:0005524,GO:0005575,GO:0005886,GO:0006810,GO:0008150,GO:0009987,GO:0015399,GO:0015405,GO:0016020,GO:0016021,GO:0016462,GO:0016787,GO:0016817,GO:0016818,GO:0016820,GO:0016887,GO:0017076,GO:0017111,GO:0022804,GO:0022857,GO:0030554,GO:0031224,GO:0032549,GO:0032550,GO:0032553,GO:0032555,GO:0032559,GO:0035639,GO:0036094,GO:…
g41581.t1	6mA	GO:0000166,GO:0001882,GO:0001883,GO:0003674,GO:0003824,GO:0005488,GO:0005515,GO:0005525,GO:0005575,GO:0005622,GO:0006464,GO:0007165,GO:0007264,GO:0008150,GO:0008152,GO:0008270,GO:0009987,GO:0016567,GO:0016874,GO:0017076,GO:0019001,GO:0019538,GO:0032446,GO:0032549,GO:0032550,GO:0032553,GO:0032555,GO:0032561,GO:0035556,GO:0035639,GO:0036094,GO:0036211,GO:0043167,GO:0043168,GO:0043169,GO:0043170,GO:…
g11471.t1	6mA	GO:0000166,GO:0001882,GO:0001883,GO:0003674,GO:0003824,GO:0005488,GO:0005524,GO:0005575,GO:0005737,GO:0005739,GO:0006464,GO:0006468,GO:0006793,GO:0006796,GO:0008150,GO:0008152,GO:0008887,GO:0009987,GO:0016301,GO:0016310,GO:0016740,GO:0016772,GO:0016773,GO:0017076,GO:0019538,GO:0030554,GO:0032549,GO:0032550,GO:0032553,GO:0032555,GO:0032559,GO:0035639,GO:0036094,GO:0036211,GO:0043167,GO:0043168,GO:…
g39644.t1	6mA	GO:0000166,GO:0001882,GO:0001883,GO:0003674,GO:0003824,GO:0005488,GO:0005524,GO:0005575,GO:0005737,GO:0006464,GO:0008150,GO:0008152,GO:0009249,GO:0009987,GO:0016740,GO:0016874,GO:0016879,GO:0016979,GO:0017076,GO:0018055,GO:0018065,GO:0018193,GO:0018205,GO:0019538,GO:0030554,GO:0032549,GO:0032550,GO:0032553,GO:0032555,GO:0032559,GO:0035639,GO:0036094,GO:0036211,GO:0043167,GO:0043168,GO:0043170,GO:…
g44922.t1	6mA	GO:0000166,GO:0001882,GO:0001883,GO:0003674,GO:0003824,GO:0005488,GO:0005524,GO:0005575,GO:0005737,GO:0016301,GO:0016740,GO:0016772,GO:0016773,GO:0017076,GO:0030554,GO:0032549,GO:0032550,GO:0032553,GO:0032555,GO:0032559,GO:0035639,GO:0036094,GO:0043167,GO:0043168,GO:0044424,GO:0044464,GO:0050201,GO:0097159,GO:0097367,GO:1901265,GO:1901363
g69523.t1	6mA	GO:0000166,GO:0001882,GO:0001883,GO:0003674,GO:0003824,GO:0005488,GO:0005524,GO:0005575,GO:0006508,GO:0008150,GO:0008152,GO:0008233,GO:0016021,GO:0016787,GO:0017076,GO:0019538,GO:0030554,GO:0031224,GO:0032549,GO:0032550,GO:0032553,GO:0032555,GO:0032559,GO:0035639,GO:0036094,GO:0043167,GO:0043168,GO:0043170,GO:0044238,GO:0044425,GO:0071704,GO:0097159,GO:0097367,GO:1901265,GO:1901363
g17865.t1	6mA	GO:0000166,GO:0001882,GO:0001883,GO:0003674,GO:0003824,GO:0005488,GO:0005524,GO:0005575,GO:0006629,GO:0006644,GO:0006650,GO:0006793,GO:0006796,GO:0006810,GO:0006897,GO:0006898,GO:0008150,GO:0008152,GO:0009987,GO:0016020,GO:0016192,GO:0016301,GO:0016307,GO:0016308,GO:0016310,GO:0016324,GO:0016740,GO:0016772,GO:0016773,GO:0017076,GO:0019637,GO:0030258,GO:0030554,GO:0032549,GO:0032550,GO:0032553,GO:…
g483.t1	6mA	GO:0000166,GO:0001882,GO:0001883,GO:0003674,GO:0003824,GO:0005488,GO:0005524,GO:0005575,GO:0006810,GO:0008150,GO:0016020,GO:0016021,GO:0016462,GO:0016787,GO:0016817,GO:0016818,GO:0016887,GO:0017076,GO:0017111,GO:0030554,GO:0031224,GO:0032549,GO:0032550,GO:0032553,GO:0032555,GO:0032559,GO:0035639,GO:0036094,GO:0043167,GO:0043168,GO:0044425,GO:0051179,GO:0051234,GO:0097159,GO:0097367,GO:1901265,GO:…
g65580.t1	6mA	GO:0000166,GO:0001882,GO:0001883,GO:0003674,GO:0003824,GO:0005488,GO:0005524,GO:0006793,GO:0006796,GO:0008150,GO:0008152,GO:0009987,GO:0016301,GO:0016310,GO:0016740,GO:0016772,GO:0017076,GO:0030554,GO:0032549,GO:0032550,GO:0032553,GO:0032555,GO:0032559,GO:0035639,GO:0036094,GO:0043167,GO:0043168,GO:0044237,GO:0097159,GO:0097367,GO:1901265,GO:1901363
g30479.t1	6mA	GO:0000166,GO:0001882,GO:0001883,GO:0003674,GO:0003824,GO:0005488,GO:0005524,GO:0016209,GO:0016491,GO:0016667,GO:0017076,GO:0030554,GO:0032542,GO:0032549,GO:0032550,GO:0032553,GO:0032555,GO:0032559,GO:0035639,GO:0036094,GO:0043167,GO:0043168,GO:0097159,GO:0097367,GO:1901265,GO:1901363
g60057.t1	6mA	GO:0000166,GO:0001882,GO:0001883,GO:0003674,GO:0003824,GO:0005488,GO:0005524,GO:0016301,GO:0016307,GO:0016308,GO:0016740,GO:0016772,GO:0016773,GO:0017076,GO:0030554,GO:0032549,GO:0032550,GO:0032553,GO:0032555,GO:0032559,GO:0035639,GO:0036094,GO:0043167,GO:0043168,GO:0097159,GO:0097367,GO:1901265,GO:1901363
g61555.t1	6mA	GO:0000166,GO:0001882,GO:0001883,GO:0003674,GO:0005488,GO:0005509,GO:0005525,GO:0005575,GO:0006810,GO:0007165,GO:0007264,GO:0008104,GO:0008150,GO:0015031,GO:0017076,GO:0019001,GO:0032549,GO:0032550,GO:0032553,GO:0032555,GO:0032561,GO:0033036,GO:0035556,GO:0035639,GO:0036094,GO:0043167,GO:0043168,GO:0043169,GO:0044424,GO:0044444,GO:0044464,GO:0045184,GO:0046872,GO:0048471,GO:0050789,GO:0050794,GO:…
g72618.t1	6mA	GO:0000166,GO:0001882,GO:0001883,GO:0003674,GO:0005488,GO:0005524,GO:0005575,GO:0005737,GO:0005885,GO:0007015,GO:0008064,GO:0008150,GO:0009987,GO:0010638,GO:0016043,GO:0017076,GO:0030554,GO:0030832,GO:0030833,GO:0030838,GO:0031334,GO:0032271,GO:0032273,GO:0032535,GO:0032549,GO:0032550,GO:0032553,GO:0032555,GO:0032559,GO:0032956,GO:0032970,GO:0032991,GO:0033043,GO:0034314,GO:0035639,GO:0036094,GO:…
g62809.t1	6mA	GO:0000166,GO:0001882,GO:0001883,GO:0003674,GO:0005488,GO:0005524,GO:0005575,GO:0005737,GO:0005886,GO:0006605,GO:0006810,GO:0006886,GO:0008104,GO:0008150,GO:0009987,GO:0015031,GO:0016020,GO:0017038,GO:0017076,GO:0030554,GO:0032549,GO:0032550,GO:0032553,GO:0032555,GO:0032559,GO:0033036,GO:0035639,GO:0036094,GO:0043167,GO:0043168,GO:0043169,GO:0044424,GO:0044464,GO:0044699,GO:0044763,GO:0044765,GO:…
g61397.t1	6mA	GO:0000166,GO:0001882,GO:0001883,GO:0003674,GO:0005488,GO:0005524,GO:0005575,GO:0017076,GO:0030554,GO:0031982,GO:0031988,GO:0032549,GO:0032550,GO:0032553,GO:0032555,GO:0032559,GO:0035639,GO:0036094,GO:0043167,GO:0043168,GO:0043226,GO:0043227,GO:0043230,GO:0044421,GO:0065010,GO:0070062,GO:0097159,GO:0097367,GO:1901265,GO:1901363,GO:1903561
g42857.t1	6mA	GO:0000166,GO:0001882,GO:0001883,GO:0003674,GO:0005488,GO:0005525,GO:0005575,GO:0005634,GO:0005829,GO:0017076,GO:0019001,GO:0032549,GO:0032550,GO:0032553,GO:0032555,GO:0032561,GO:0035639,GO:0036094,GO:0043167,GO:0043168,GO:0043226,GO:0043227,GO:0043229,GO:0043231,GO:0044424,GO:0044444,GO:0044464,GO:0097159,GO:0097367,GO:1901265,GO:1901363
g18151.t1	6mA	GO:0000166,GO:0001882,GO:0001883,GO:0003674,GO:0005488,GO:0005525,GO:0005575,GO:0005794,GO:0006810,GO:0007165,GO:0007264,GO:0008104,GO:0008150,GO:0015031,GO:0016192,GO:0017076,GO:0019001,GO:0032549,GO:0032550,GO:0032553,GO:0032555,GO:0032561,GO:0033036,GO:0035556,GO:0035639,GO:0036094,GO:0043167,GO:0043168,GO:0043226,GO:0043227,GO:0043229,GO:0043231,GO:0044424,GO:0044444,GO:0044464,GO:0045184,GO:…
g27096.t1	6mA	GO:0000166,GO:0001882,GO:0001883,GO:0003674,GO:0005488,GO:0005525,GO:0005575,GO:0005794,GO:0006810,GO:0007165,GO:0007264,GO:0008104,GO:0008150,GO:0015031,GO:0016192,GO:0017076,GO:0019001,GO:0032549,GO:0032550,GO:0032553,GO:0032555,GO:0032561,GO:0033036,GO:0035556,GO:0035639,GO:0036094,GO:0043167,GO:0043168,GO:0043226,GO:0043227,GO:0043229,GO:0043231,GO:0044424,GO:0044444,GO:0044464,GO:0045184,GO:…
g42557.t1	6mA	GO:0000166,GO:0001882,GO:0001883,GO:0003674,GO:0005488,GO:0005525,GO:0005575,GO:0005829,GO:0017076,GO:0019001,GO:0032549,GO:0032550,GO:0032553,GO:0032555,GO:0032561,GO:0035639,GO:0036094,GO:0043167,GO:0043168,GO:0044424,GO:0044444,GO:0044464,GO:0097159,GO:0097367,GO:1901265,GO:1901363
g14951.t1	6mA	GO:0000166,GO:0001882,GO:0001883,GO:0003674,GO:0005488,GO:0005525,GO:0008150,GO:0017076,GO:0019001,GO:0022613,GO:0032549,GO:0032550,GO:0032553,GO:0032555,GO:0032561,GO:0035639,GO:0036094,GO:0042254,GO:0043167,GO:0043168,GO:0044085,GO:0071840,GO:0097159,GO:0097367,GO:1901265,GO:1901363
g17252.t1	6mA	GO:0000166,GO:0001882,GO:0001883,GO:0003674,GO:0005488,GO:0005525,GO:0017076,GO:0019001,GO:0032549,GO:0032550,GO:0032553,GO:0032555,GO:0032561,GO:0035639,GO:0036094,GO:0043167,GO:0043168,GO:0097159,GO:0097367,GO:1901265,GO:1901363
g58298.t1	6mA	GO:0000166,GO:0001882,GO:0001883,GO:0003674,GO:0005488,GO:0005525,GO:0017076,GO:0019001,GO:0032549,GO:0032550,GO:0032553,GO:0032555,GO:0032561,GO:0035639,GO:0036094,GO:0043167,GO:0043168,GO:0097159,GO:0097367,GO:1901265,GO:1901363
g67022.t1	6mA	GO:0000166,GO:0001882,GO:0001883,GO:0003674,GO:0005488,GO:0005525,GO:0017076,GO:0019001,GO:0032549,GO:0032550,GO:0032553,GO:0032555,GO:0032561,GO:0035639,GO:0036094,GO:0043167,GO:0043168,GO:0097159,GO:0097367,GO:1901265,GO:1901363
g33234.t1	6mA	GO:0000166,GO:0001932,GO:0001933,GO:0001934,GO:0002376,GO:0002791,GO:0003008,GO:0003014,GO:0003091,GO:0003674,GO:0004857,GO:0004860,GO:0004862,GO:0005488,GO:0005515,GO:0005575,GO:0005829,GO:0005886,GO:0005952,GO:0006091,GO:0006112,GO:0006464,GO:0006468,GO:0006469,GO:0006793,GO:0006796,GO:0006810,GO:0006833,GO:0006950,GO:0006952,GO:0006955,GO:0007165,GO:0007166,GO:0007167,GO:0007169,GO:0007173,GO:…
g40886.t1	6mA	GO:0000166,GO:0003006,GO:0003674,GO:0003676,GO:0003723,GO:0005488,GO:0005575,GO:0005777,GO:0007049,GO:0007276,GO:0007281,GO:0007292,GO:0008150,GO:0009987,GO:0010468,GO:0019222,GO:0022412,GO:0022414,GO:0032502,GO:0036094,GO:0042579,GO:0043226,GO:0043227,GO:0043229,GO:0043231,GO:0044424,GO:0044444,GO:0044464,GO:0044699,GO:0044702,GO:0044763,GO:0044767,GO:0048468,GO:0048477,GO:0048609,GO:0048856,GO:…
g66039.t1	6mA	GO:0000166,GO:0003674,GO:0003676,GO:0003723,GO:0005488,GO:0005575,GO:0005634,GO:0005730,GO:0006139,GO:0006364,GO:0006725,GO:0006807,GO:0008150,GO:0008152,GO:0009987,GO:0016070,GO:0016072,GO:0019843,GO:0034470,GO:0034641,GO:0034660,GO:0036094,GO:0043170,GO:0043226,GO:0043227,GO:0043228,GO:0043229,GO:0043231,GO:0043232,GO:0044237,GO:0044238,GO:0044260,GO:0044422,GO:0044424,GO:0044428,GO:0044446,GO:…
g17343.t1	6mA	GO:0000166,GO:0003674,GO:0003676,GO:0003723,GO:0005488,GO:0005575,GO:0005634,GO:0030529,GO:0032991,GO:0036094,GO:0043226,GO:0043227,GO:0043229,GO:0043231,GO:0044424,GO:0044464,GO:0097159,GO:1901265,GO:1901363
g23414.t1	6mA	GO:0000166,GO:0003674,GO:0003676,GO:0003723,GO:0005488,GO:0005575,GO:0005654,GO:0005681,GO:0005737,GO:0006139,GO:0006396,GO:0006397,GO:0006725,GO:0006807,GO:0008150,GO:0008152,GO:0008380,GO:0009987,GO:0016070,GO:0016071,GO:0030529,GO:0032991,GO:0034641,GO:0036094,GO:0043170,GO:0044237,GO:0044238,GO:0044260,GO:0044422,GO:0044424,GO:0044428,GO:0044446,GO:0044464,GO:0046483,GO:0071704,GO:0090304,GO:…
g27622.t1	6mA	GO:0000166,GO:0003674,GO:0003676,GO:0003723,GO:0005488,GO:0005575,GO:0005654,GO:0005681,GO:0005737,GO:0006139,GO:0006396,GO:0006397,GO:0006725,GO:0006807,GO:0008150,GO:0008152,GO:0008380,GO:0009987,GO:0016070,GO:0016071,GO:0030529,GO:0032991,GO:0034641,GO:0036094,GO:0043170,GO:0044237,GO:0044238,GO:0044260,GO:0044422,GO:0044424,GO:0044428,GO:0044446,GO:0044464,GO:0046483,GO:0071704,GO:0090304,GO:…
g73329.t1	6mA	GO:0000166,GO:0003674,GO:0003676,GO:0003723,GO:0005488,GO:0036094,GO:0044822,GO:0097159,GO:1901265,GO:1901363
g68594.t1	6mA	GO:0000166,GO:0003674,GO:0003824,GO:0003885,GO:0005488,GO:0005575,GO:0008150,GO:0008152,GO:0008168,GO:0016020,GO:0016491,GO:0016614,GO:0016740,GO:0016741,GO:0016899,GO:0036094,GO:0043167,GO:0043168,GO:0044699,GO:0044710,GO:0048037,GO:0050660,GO:0050662,GO:0055114,GO:0097159,GO:1901265,GO:1901363
g37452.t1	6mA	GO:0000166,GO:0003674,GO:0003824,GO:0003956,GO:0005488,GO:0005515,GO:0005575,GO:0005576,GO:0008150,GO:0009405,GO:0016740,GO:0016757,GO:0016763,GO:0016772,GO:0016779,GO:0036094,GO:0051704,GO:0097159,GO:1901265,GO:1901363
g52417.t1	6mA	GO:0000166,GO:0003674,GO:0003824,GO:0003956,GO:0005488,GO:0005575,GO:0005576,GO:0005975,GO:0006464,GO:0006471,GO:0006486,GO:0008150,GO:0008152,GO:0009405,GO:0009987,GO:0016740,GO:0016757,GO:0016763,GO:0016772,GO:0016779,GO:0019538,GO:0036094,GO:0036211,GO:0043170,GO:0043412,GO:0043413,GO:0044237,GO:0044238,GO:0044260,GO:0044267,GO:0044699,GO:0044710,GO:0044723,GO:0044763,GO:0051704,GO:0070085,GO:…
g62451.t1	6mA	GO:0000166,GO:0003674,GO:0003824,GO:0003957,GO:0005215,GO:0005488,GO:0005575,GO:0005739,GO:0005743,GO:0005746,GO:0006082,GO:0006099,GO:0006101,GO:0006139,GO:0006725,GO:0006732,GO:0006733,GO:0006739,GO:0006740,GO:0006753,GO:0006793,GO:0006796,GO:0006807,GO:0006810,GO:0006811,GO:0006812,GO:0006818,GO:0008150,GO:0008152,GO:0008324,GO:0008746,GO:0008750,GO:0009117,GO:0009987,GO:0015075,GO:0015077,GO:…
g871.t1	6mA	GO:0000166,GO:0003674,GO:0003824,GO:0004407,GO:0005488,GO:0005575,GO:0005737,GO:0005739,GO:0005743,GO:0005759,GO:0006091,GO:0006325,GO:0006464,GO:0006476,GO:0006521,GO:0006996,GO:0008150,GO:0008152,GO:0008270,GO:0009060,GO:0009892,GO:0009987,GO:0010565,GO:0010605,GO:0015980,GO:0016020,GO:0016043,GO:0016568,GO:0016569,GO:0016570,GO:0016575,GO:0016787,GO:0016810,GO:0016811,GO:0017136,GO:0018193,GO:…
g41025.t1	6mA	GO:0000166,GO:0003674,GO:0003824,GO:0004616,GO:0005488,GO:0005515,GO:0005575,GO:0005739,GO:0006082,GO:0006520,GO:0006573,GO:0006574,GO:0006807,GO:0008150,GO:0008152,GO:0008442,GO:0009056,GO:0009063,GO:0009081,GO:0009083,GO:0009987,GO:0016054,GO:0016491,GO:0016614,GO:0016616,GO:0019752,GO:0036094,GO:0043226,GO:0043227,GO:0043229,GO:0043231,GO:0043436,GO:0044237,GO:0044238,GO:0044248,GO:0044281,GO:…
g20709.t1	6mA	GO:0000166,GO:0003674,GO:0003824,GO:0004733,GO:0005488,GO:0008150,GO:0008152,GO:0010181,GO:0016491,GO:0016638,GO:0016641,GO:0032553,GO:0036094,GO:0043167,GO:0043168,GO:0044699,GO:0044710,GO:0048037,GO:0050662,GO:0055114,GO:0097159,GO:0097367,GO:1901265,GO:1901363
g55450.t1	6mA	GO:0000166,GO:0003674,GO:0003824,GO:0005488,GO:0005575,GO:0005886,GO:0008150,GO:0008152,GO:0016020,GO:0016491,GO:0016614,GO:0036094,GO:0043167,GO:0043168,GO:0044464,GO:0044699,GO:0044710,GO:0048037,GO:0050660,GO:0050662,GO:0055114,GO:0097159,GO:1901265,GO:1901363
g29854.t1	6mA	GO:0000166,GO:0003674,GO:0003824,GO:0005488,GO:0008150,GO:0008152,GO:0008863,GO:0016491,GO:0016614,GO:0016616,GO:0016620,GO:0016903,GO:0036094,GO:0044699,GO:0044710,GO:0048037,GO:0050662,GO:0051287,GO:0055114,GO:0097159,GO:1901265,GO:1901363
g7437.t1	6mA	GO:0000166,GO:0003674,GO:0005488,GO:0005575,GO:0005737,GO:0005886,GO:0005952,GO:0006928,GO:0007411,GO:0007610,GO:0007622,GO:0007623,GO:0007626,GO:0008150,GO:0008603,GO:0009987,GO:0016020,GO:0017076,GO:0019207,GO:0019887,GO:0030234,GO:0030534,GO:0030551,GO:0030552,GO:0030554,GO:0032501,GO:0032553,GO:0032555,GO:0032559,GO:0032991,GO:0036094,GO:0043167,GO:0043168,GO:0043234,GO:0044424,GO:0044464,GO:…
g36590.t1	6mA	GO:0000166,GO:0003674,GO:0005488,GO:0005575,GO:0005765,GO:0005774,GO:0006810,GO:0006811,GO:0008150,GO:0016020,GO:0016021,GO:0031090,GO:0031224,GO:0031982,GO:0031988,GO:0036094,GO:0043226,GO:0043227,GO:0043230,GO:0044421,GO:0044422,GO:0044424,GO:0044425,GO:0044437,GO:0044444,GO:0044446,GO:0044464,GO:0044699,GO:0044765,GO:0051179,GO:0051234,GO:0065010,GO:0070062,GO:0097159,GO:0098588,GO:1901265,GO:…
g18551.t1	6mA	GO:0000175,GO:0003674,GO:0003824,GO:0004518,GO:0004527,GO:0004532,GO:0004535,GO:0004540,GO:0005488,GO:0005515,GO:0005575,GO:0005634,GO:0005737,GO:0006139,GO:0006351,GO:0006355,GO:0006396,GO:0006397,GO:0006417,GO:0006725,GO:0006807,GO:0008150,GO:0008152,GO:0008408,GO:0009058,GO:0009059,GO:0009889,GO:0009892,GO:0009987,GO:0010468,GO:0010556,GO:0010605,GO:0010608,GO:0010629,GO:0016070,GO:0016071,GO:…
g3615.t1	6mA	GO:0000175,GO:0003674,GO:0003824,GO:0004518,GO:0004527,GO:0004532,GO:0004535,GO:0004540,GO:0005488,GO:0005575,GO:0005759,GO:0006139,GO:0006396,GO:0006397,GO:0006725,GO:0006807,GO:0008150,GO:0008152,GO:0008408,GO:0009987,GO:0016070,GO:0016071,GO:0016787,GO:0016788,GO:0016796,GO:0016896,GO:0031974,GO:0034641,GO:0043167,GO:0043169,GO:0043170,GO:0043233,GO:0044237,GO:0044238,GO:0044260,GO:0044422,GO:…
g57381.t1	6mA	GO:0000177,GO:0000178,GO:0003674,GO:0003676,GO:0003723,GO:0005488,GO:0005575,GO:0006139,GO:0006401,GO:0006725,GO:0006807,GO:0008150,GO:0008152,GO:0009056,GO:0009057,GO:0009987,GO:0016070,GO:0016072,GO:0016075,GO:0017091,GO:0019439,GO:0032991,GO:0034641,GO:0034655,GO:0034660,GO:0034661,GO:0043170,GO:0043234,GO:0044237,GO:0044238,GO:0044248,GO:0044260,GO:0044265,GO:0044270,GO:0044424,GO:0044444,GO:…
g69900.t1	6mA	GO:0000184,GO:0000288,GO:0000290,GO:0000291,GO:0000932,GO:0000956,GO:0003674,GO:0003676,GO:0003723,GO:0003729,GO:0003824,GO:0005488,GO:0005575,GO:0005634,GO:0005737,GO:0005829,GO:0006139,GO:0006401,GO:0006402,GO:0006725,GO:0006807,GO:0008047,GO:0008150,GO:0008152,GO:0009056,GO:0009057,GO:0009893,GO:0009987,GO:0010467,GO:0016020,GO:0016070,GO:0016071,GO:0016787,GO:0019222,GO:0019439,GO:0030234,GO:…
g68166.t1	6mA	GO:0000184,GO:0000956,GO:0003674,GO:0003676,GO:0003723,GO:0003729,GO:0003735,GO:0005198,GO:0005488,GO:0005575,GO:0005634,GO:0005730,GO:0005737,GO:0005829,GO:0005840,GO:0005912,GO:0005924,GO:0005925,GO:0006139,GO:0006401,GO:0006402,GO:0006412,GO:0006413,GO:0006414,GO:0006415,GO:0006417,GO:0006446,GO:0006605,GO:0006612,GO:0006613,GO:0006614,GO:0006725,GO:0006807,GO:0006810,GO:0006886,GO:0008104,GO:…
g28162.t1	6mA	GO:0000184,GO:0000956,GO:0006139,GO:0006401,GO:0006402,GO:0006725,GO:0006807,GO:0008150,GO:0008152,GO:0009056,GO:0009057,GO:0009987,GO:0016070,GO:0016071,GO:0019439,GO:0034641,GO:0034655,GO:0043170,GO:0044237,GO:0044238,GO:0044248,GO:0044260,GO:0044265,GO:0044270,GO:0046483,GO:0046700,GO:0071704,GO:0090304,GO:1901360,GO:1901361,GO:1901575
g59711.t1	6mA	GO:0000187,GO:0001540,GO:0001666,GO:0001817,GO:0001818,GO:0001932,GO:0001934,GO:0003008,GO:0003674,GO:0004871,GO:0004872,GO:0004888,GO:0004889,GO:0005215,GO:0005216,GO:0005230,GO:0005231,GO:0005261,GO:0005488,GO:0005515,GO:0005575,GO:0005886,GO:0005892,GO:0006810,GO:0006811,GO:0006812,GO:0006816,GO:0006873,GO:0006874,GO:0006875,GO:0006950,GO:0007154,GO:0007165,GO:0007267,GO:0007268,GO:0007271,GO:…
g32472.t1	6mA	GO:0000187,GO:0001556,GO:0001932,GO:0001934,GO:0003006,GO:0003674,GO:0003707,GO:0004871,GO:0004872,GO:0005488,GO:0005496,GO:0005575,GO:0005886,GO:0006140,GO:0007165,GO:0007194,GO:0007275,GO:0008150,GO:0008289,GO:0009719,GO:0009725,GO:0009755,GO:0009889,GO:0009890,GO:0009892,GO:0009893,GO:0009966,GO:0009967,GO:0009987,GO:0010033,GO:0010562,GO:0010563,GO:0010604,GO:0010646,GO:0010647,GO:0014070,GO:…
g65984.t1	6mA	GO:0000188,GO:0001932,GO:0001933,GO:0002237,GO:0002682,GO:0002683,GO:0002697,GO:0002698,GO:0002819,GO:0003674,GO:0003824,GO:0004721,GO:0004725,GO:0005575,GO:0005654,GO:0005794,GO:0006464,GO:0006469,GO:0006470,GO:0006793,GO:0006796,GO:0008138,GO:0008150,GO:0008152,GO:0009605,GO:0009607,GO:0009892,GO:0009966,GO:0009968,GO:0009987,GO:0010001,GO:0010033,GO:0010563,GO:0010605,GO:0010646,GO:0010648,GO:…
g27561.t1	6mA	GO:0000209,GO:0002376,GO:0002474,GO:0003674,GO:0003824,GO:0004175,GO:0004177,GO:0004180,GO:0004197,GO:0005575,GO:0005634,GO:0005737,GO:0005829,GO:0006464,GO:0006508,GO:0008150,GO:0008152,GO:0008233,GO:0008234,GO:0008238,GO:0009636,GO:0009987,GO:0016567,GO:0016787,GO:0019538,GO:0019882,GO:0031982,GO:0031988,GO:0032446,GO:0036211,GO:0042221,GO:0042493,GO:0043170,GO:0043226,GO:0043227,GO:0043229,GO:…
g31917.t1	6mA	GO:0000212,GO:0000226,GO:0001709,GO:0003006,GO:0005575,GO:0005737,GO:0005811,GO:0005856,GO:0005886,GO:0006928,GO:0006996,GO:0007010,GO:0007015,GO:0007017,GO:0007051,GO:0007276,GO:0007281,GO:0007282,GO:0007292,GO:0007294,GO:0007411,GO:0007525,GO:0007527,GO:0008150,GO:0008283,GO:0008302,GO:0008356,GO:0009987,GO:0016020,GO:0016043,GO:0016328,GO:0019725,GO:0022402,GO:0022412,GO:0022414,GO:0030029,GO:…
g2846.t1	6mA	GO:0000226,GO:0000242,GO:0000280,GO:0000922,GO:0000924,GO:0000930,GO:0000931,GO:0003674,GO:0005488,GO:0005515,GO:0005575,GO:0005654,GO:0005730,GO:0005737,GO:0005813,GO:0005814,GO:0005815,GO:0005886,GO:0006996,GO:0007010,GO:0007017,GO:0007019,GO:0007067,GO:0008104,GO:0008150,GO:0008274,GO:0009987,GO:0016020,GO:0016043,GO:0022402,GO:0022411,GO:0031109,GO:0032879,GO:0032880,GO:0032984,GO:0032991,GO:…
g6731.t1	6mA	GO:0000226,GO:0000776,GO:0000777,GO:0003674,GO:0005488,GO:0005515,GO:0005575,GO:0005794,GO:0005802,GO:0005815,GO:0005819,GO:0005874,GO:0005881,GO:0005886,GO:0006996,GO:0007010,GO:0007017,GO:0007020,GO:0007026,GO:0007030,GO:0007051,GO:0007052,GO:0008017,GO:0008092,GO:0008150,GO:0009987,GO:0010458,GO:0010639,GO:0015631,GO:0016020,GO:0016043,GO:0022402,GO:0031023,GO:0031110,GO:0031111,GO:0031114,GO:…
g70161.t1	6mA	GO:0000226,GO:0001932,GO:0001934,GO:0003674,GO:0005085,GO:0005488,GO:0005515,GO:0005575,GO:0005622,GO:0005912,GO:0005924,GO:0005925,GO:0006521,GO:0006996,GO:0007010,GO:0007017,GO:0007163,GO:0007165,GO:0007264,GO:0007409,GO:0008150,GO:0009653,GO:0009893,GO:0009987,GO:0010562,GO:0010565,GO:0010604,GO:0014910,GO:0014911,GO:0016043,GO:0017016,GO:0017048,GO:0019220,GO:0019222,GO:0019899,GO:0022027,GO:…
g57428.t1	6mA	GO:0000245,GO:0000974,GO:0003674,GO:0003676,GO:0003723,GO:0005488,GO:0005575,GO:0005681,GO:0006139,GO:0006396,GO:0006725,GO:0006807,GO:0008150,GO:0008152,GO:0009719,GO:0009987,GO:0010033,GO:0016043,GO:0016070,GO:0021987,GO:0022607,GO:0022618,GO:0030529,GO:0032502,GO:0032991,GO:0034622,GO:0034641,GO:0042221,GO:0043170,GO:0043234,GO:0043933,GO:0044237,GO:0044238,GO:0044260,GO:0044422,GO:0044424,GO:…
g49319.t1	6mA	GO:0000266,GO:0001541,GO:0001764,GO:0001775,GO:0001776,GO:0001777,GO:0001782,GO:0001783,GO:0001822,GO:0001836,GO:0001844,GO:0001894,GO:0001932,GO:0001933,GO:0001974,GO:0002253,GO:0002260,GO:0002262,GO:0002339,GO:0002352,GO:0002358,GO:0002376,GO:0002429,GO:0002682,GO:0002684,GO:0002757,GO:0002764,GO:0002768,GO:0002902,GO:0002904,GO:0003006,GO:0003674,GO:0005215,GO:0005488,GO:0005515,GO:0005575,GO:…
g62193.t1	6mA	GO:0000270,GO:0003674,GO:0003824,GO:0005575,GO:0005576,GO:0006022,GO:0006026,GO:0006027,GO:0006807,GO:0006950,GO:0006952,GO:0008150,GO:0008152,GO:0008745,GO:0009056,GO:0009057,GO:0009253,GO:0009605,GO:0009607,GO:0009617,GO:0009987,GO:0016043,GO:0016787,GO:0016810,GO:0016811,GO:0030203,GO:0042742,GO:0043170,GO:0043207,GO:0045229,GO:0050896,GO:0051704,GO:0051707,GO:0071554,GO:0071555,GO:0071704,GO:…
g68564.t1	6mA	GO:0000270,GO:0005575,GO:0005886,GO:0006022,GO:0006023,GO:0006024,GO:0006807,GO:0008150,GO:0008152,GO:0008360,GO:0009058,GO:0009059,GO:0009252,GO:0009987,GO:0016020,GO:0016043,GO:0022603,GO:0022604,GO:0030154,GO:0030203,GO:0030435,GO:0032502,GO:0034645,GO:0043170,GO:0043934,GO:0044036,GO:0044038,GO:0044237,GO:0044249,GO:0044260,GO:0044464,GO:0044699,GO:0044710,GO:0044711,GO:0044763,GO:0044767,GO:…
g63060.t1	6mA	GO:0000271,GO:0003674,GO:0003824,GO:0005575,GO:0005794,GO:0005829,GO:0005911,GO:0005975,GO:0005976,GO:0006073,GO:0006139,GO:0006725,GO:0006753,GO:0006793,GO:0006796,GO:0006807,GO:0008150,GO:0008152,GO:0009058,GO:0009059,GO:0009117,GO:0009225,GO:0009250,GO:0009506,GO:0009832,GO:0009987,GO:0016020,GO:0016043,GO:0016051,GO:0016853,GO:0016866,GO:0019637,GO:0030054,GO:0030243,GO:0030244,GO:0033356,GO:…
g28103.t1	6mA	GO:0000272,GO:0001871,GO:0003674,GO:0003824,GO:0004553,GO:0005488,GO:0005575,GO:0005576,GO:0005975,GO:0005976,GO:0006073,GO:0008150,GO:0008152,GO:0008810,GO:0009056,GO:0009057,GO:0009251,GO:0009987,GO:0016052,GO:0016787,GO:0016798,GO:0030243,GO:0030245,GO:0030246,GO:0030247,GO:0030248,GO:0043170,GO:0044042,GO:0044237,GO:0044238,GO:0044247,GO:0044248,GO:0044260,GO:0044262,GO:0044264,GO:0044275,GO:…
g53483.t1	6mA	GO:0000272,GO:0001871,GO:0003674,GO:0003824,GO:0004553,GO:0005488,GO:0005575,GO:0005576,GO:0005975,GO:0005976,GO:0006073,GO:0008150,GO:0008152,GO:0008810,GO:0009056,GO:0009057,GO:0009251,GO:0009987,GO:0016052,GO:0016787,GO:0016798,GO:0030243,GO:0030245,GO:0030246,GO:0030247,GO:0030248,GO:0043170,GO:0044042,GO:0044237,GO:0044238,GO:0044247,GO:0044248,GO:0044260,GO:0044262,GO:0044264,GO:0044275,GO:…
g45242.t1	6mA	GO:0000276,GO:0003674,GO:0005215,GO:0005575,GO:0005739,GO:0005811,GO:0006139,GO:0006163,GO:0006164,GO:0006725,GO:0006753,GO:0006754,GO:0006793,GO:0006796,GO:0006807,GO:0006810,GO:0006811,GO:0006812,GO:0006818,GO:0006897,GO:0006909,GO:0008150,GO:0008152,GO:0008324,GO:0009058,GO:0009116,GO:0009117,GO:0009119,GO:0009123,GO:0009124,GO:0009126,GO:0009127,GO:0009141,GO:0009142,GO:0009144,GO:0009145,GO:…
g22823.t1	6mA	GO:0000280,GO:0000723,GO:0000932,GO:0000956,GO:0003674,GO:0003676,GO:0003677,GO:0003723,GO:0003824,GO:0004518,GO:0004527,GO:0004532,GO:0004534,GO:0004540,GO:0005488,GO:0005575,GO:0005634,GO:0005737,GO:0005794,GO:0005856,GO:0005886,GO:0006139,GO:0006259,GO:0006396,GO:0006401,GO:0006402,GO:0006725,GO:0006807,GO:0006996,GO:0007126,GO:0007568,GO:0007569,GO:0008150,GO:0008152,GO:0008334,GO:0008409,GO:…
g8199.t1	6mA	GO:0000280,GO:0000922,GO:0003674,GO:0005488,GO:0005515,GO:0005575,GO:0005737,GO:0005813,GO:0005815,GO:0005819,GO:0006996,GO:0007067,GO:0007346,GO:0008150,GO:0009987,GO:0016043,GO:0022402,GO:0030496,GO:0032991,GO:0043226,GO:0043228,GO:0043229,GO:0043232,GO:0043234,GO:0044422,GO:0044424,GO:0044430,GO:0044446,GO:0044464,GO:0044699,GO:0044763,GO:0048285,GO:0050789,GO:0050794,GO:0051233,GO:0051301,GO:…
g69683.t1	6mA	GO:0000280,GO:0000922,GO:0003674,GO:0005488,GO:0005515,GO:0005575,GO:0005737,GO:0005813,GO:0005815,GO:0006996,GO:0007067,GO:0007346,GO:0008150,GO:0009987,GO:0016043,GO:0022402,GO:0030496,GO:0043226,GO:0043228,GO:0043229,GO:0043232,GO:0044422,GO:0044424,GO:0044430,GO:0044446,GO:0044464,GO:0044699,GO:0044763,GO:0048285,GO:0050789,GO:0050794,GO:0051301,GO:0051726,GO:0065007,GO:0071840,GO:1902589,GO:…
g68792.t1	6mA	GO:0000280,GO:0001932,GO:0001934,GO:0005575,GO:0005634,GO:0005737,GO:0005819,GO:0006139,GO:0006351,GO:0006355,GO:0006521,GO:0006725,GO:0006807,GO:0006950,GO:0006974,GO:0006996,GO:0007067,GO:0007165,GO:0007346,GO:0008150,GO:0008152,GO:0009058,GO:0009059,GO:0009889,GO:0009891,GO:0009892,GO:0009893,GO:0009894,GO:0009895,GO:0009987,GO:0010468,GO:0010556,GO:0010557,GO:0010562,GO:0010564,GO:0010565,GO:…
g6742.t1	6mA	GO:0000280,GO:0001947,GO:0002009,GO:0003143,GO:0003674,GO:0003676,GO:0003677,GO:0003824,GO:0005488,GO:0005515,GO:0005575,GO:0005634,GO:0005654,GO:0005694,GO:0006325,GO:0006355,GO:0006464,GO:0006479,GO:0006996,GO:0007059,GO:0007067,GO:0007389,GO:0008150,GO:0008152,GO:0008168,GO:0008170,GO:0008213,GO:0008270,GO:0008276,GO:0008757,GO:0009653,GO:0009798,GO:0009889,GO:0009890,GO:0009892,GO:0009987,GO:…
g53540.t1	6mA	GO:0000280,GO:0003002,GO:0003674,GO:0003824,GO:0005488,GO:0005515,GO:0005575,GO:0005634,GO:0005694,GO:0006139,GO:0006325,GO:0006351,GO:0006355,GO:0006464,GO:0006479,GO:0006725,GO:0006807,GO:0006996,GO:0007067,GO:0007389,GO:0008150,GO:0008152,GO:0008168,GO:0008170,GO:0008213,GO:0008276,GO:0008757,GO:0009058,GO:0009059,GO:0009889,GO:0009893,GO:0009953,GO:0009987,GO:0010468,GO:0010556,GO:0010604,GO:…
g18099.t1	6mA	GO:0000280,GO:0003674,GO:0005198,GO:0005488,GO:0005515,GO:0005575,GO:0005819,GO:0005886,GO:0006109,GO:0006810,GO:0006886,GO:0006897,GO:0006898,GO:0006996,GO:0007030,GO:0007067,GO:0008022,GO:0008092,GO:0008104,GO:0008150,GO:0009889,GO:0009890,GO:0009892,GO:0009987,GO:0010556,GO:0010558,GO:0010605,GO:0012506,GO:0015031,GO:0016020,GO:0016023,GO:0016043,GO:0016192,GO:0019222,GO:0022402,GO:0030117,GO:…
g8746.t1	6mA	GO:0000280,GO:0003674,GO:0005488,GO:0005515,GO:0005575,GO:0005634,GO:0006996,GO:0007049,GO:0007067,GO:0007346,GO:0008150,GO:0009794,GO:0009987,GO:0016043,GO:0016538,GO:0019207,GO:0019887,GO:0019899,GO:0019900,GO:0019901,GO:0022402,GO:0030234,GO:0043226,GO:0043227,GO:0043229,GO:0043231,GO:0044424,GO:0044464,GO:0044699,GO:0044763,GO:0045995,GO:0048285,GO:0050789,GO:0050793,GO:0050794,GO:0051239,GO:…
g17546.t1	6mA	GO:0000280,GO:0003674,GO:0006996,GO:0007049,GO:0007126,GO:0007127,GO:0008150,GO:0009987,GO:0016043,GO:0016538,GO:0019207,GO:0019887,GO:0022402,GO:0030234,GO:0044699,GO:0044763,GO:0048285,GO:0051301,GO:0071840,GO:1902589,GO:1903046
g18399.t1	6mA	GO:0000280,GO:0005575,GO:0005634,GO:0006996,GO:0007067,GO:0008150,GO:0009987,GO:0016043,GO:0022402,GO:0043226,GO:0043227,GO:0043229,GO:0043231,GO:0044424,GO:0044464,GO:0044699,GO:0044763,GO:0048285,GO:0051301,GO:0071840,GO:1902589,GO:1903047
g33885.t1	6mA	GO:0000281,GO:0000323,GO:0000910,GO:0001508,GO:0002028,GO:0003254,GO:0003674,GO:0005198,GO:0005200,GO:0005488,GO:0005515,GO:0005575,GO:0005764,GO:0005773,GO:0005783,GO:0005794,GO:0005856,GO:0005886,GO:0005911,GO:0006605,GO:0006612,GO:0006810,GO:0006886,GO:0006892,GO:0006893,GO:0006928,GO:0006996,GO:0007009,GO:0007010,GO:0007016,GO:0007165,GO:0007409,GO:0007411,GO:0008092,GO:0008104,GO:0008150,GO:…
g23796.t1	6mA	GO:0000287,GO:0003674,GO:0003824,GO:0004610,GO:0004614,GO:0005488,GO:0005575,GO:0005829,GO:0005975,GO:0006040,GO:0006041,GO:0006047,GO:0006048,GO:0006139,GO:0006464,GO:0006486,GO:0006487,GO:0006488,GO:0006493,GO:0006725,GO:0006753,GO:0006793,GO:0006796,GO:0006807,GO:0007276,GO:0007283,GO:0008150,GO:0008152,GO:0009058,GO:0009117,GO:0009165,GO:0009225,GO:0009226,GO:0009987,GO:0016853,GO:0016866,GO:…
g57087.t1	6mA	GO:0000287,GO:0003674,GO:0003824,GO:0004614,GO:0005488,GO:0005575,GO:0005737,GO:0005975,GO:0005996,GO:0006006,GO:0006793,GO:0006796,GO:0008150,GO:0008152,GO:0008973,GO:0009056,GO:0009987,GO:0016853,GO:0016866,GO:0016868,GO:0019318,GO:0019637,GO:0019692,GO:0043167,GO:0043169,GO:0044237,GO:0044238,GO:0044424,GO:0044464,GO:0044699,GO:0044710,GO:0044723,GO:0046386,GO:0046434,GO:0046872,GO:0071704,GO:…
g67737.t1	6mA	GO:0000287,GO:0003674,GO:0003824,GO:0004614,GO:0005488,GO:0005575,GO:0005737,GO:0005975,GO:0005996,GO:0006006,GO:0006793,GO:0006796,GO:0008150,GO:0008152,GO:0008973,GO:0009056,GO:0009987,GO:0016853,GO:0016866,GO:0016868,GO:0019318,GO:0019637,GO:0019692,GO:0043167,GO:0043169,GO:0044237,GO:0044238,GO:0044424,GO:0044464,GO:0044699,GO:0044710,GO:0044723,GO:0046386,GO:0046434,GO:0046872,GO:0071704,GO:…
g60274.t1	6mA	GO:0000302,GO:0003006,GO:0003341,GO:0003351,GO:0003674,GO:0003824,GO:0004550,GO:0005575,GO:0005929,GO:0006139,GO:0006163,GO:0006164,GO:0006165,GO:0006183,GO:0006213,GO:0006220,GO:0006221,GO:0006228,GO:0006241,GO:0006725,GO:0006753,GO:0006793,GO:0006796,GO:0006807,GO:0006928,GO:0006950,GO:0006979,GO:0006996,GO:0007017,GO:0007018,GO:0007281,GO:0007286,GO:0008150,GO:0008152,GO:0009058,GO:0009116,GO:…
g56143.t1	6mA	GO:0000302,GO:0003674,GO:0005215,GO:0005575,GO:0005886,GO:0006810,GO:0006811,GO:0006812,GO:0006813,GO:0006814,GO:0006950,GO:0006970,GO:0006979,GO:0008150,GO:0008324,GO:0009526,GO:0009628,GO:0009651,GO:0009941,GO:0009987,GO:0010035,GO:0010163,GO:0015075,GO:0015077,GO:0015078,GO:0015291,GO:0015297,GO:0015298,GO:0015299,GO:0015672,GO:0016020,GO:0016021,GO:0019222,GO:0022804,GO:0022857,GO:0022890,GO:…
g40126.t1	6mA	GO:0000323,GO:0001948,GO:0002020,GO:0003008,GO:0003674,GO:0004872,GO:0005041,GO:0005488,GO:0005509,GO:0005515,GO:0005575,GO:0005764,GO:0005768,GO:0005769,GO:0005770,GO:0005773,GO:0005794,GO:0005886,GO:0005905,GO:0006066,GO:0006629,GO:0006810,GO:0006811,GO:0006820,GO:0006869,GO:0006897,GO:0006898,GO:0008150,GO:0008152,GO:0008202,GO:0008203,GO:0009056,GO:0009057,GO:0009889,GO:0009891,GO:0009893,GO:…
g13705.t1	6mA	GO:0000323,GO:0003008,GO:0003012,GO:0003674,GO:0005215,GO:0005216,GO:0005217,GO:0005218,GO:0005244,GO:0005245,GO:0005261,GO:0005262,GO:0005575,GO:0005764,GO:0005765,GO:0005773,GO:0005774,GO:0005886,GO:0006810,GO:0006811,GO:0006936,GO:0006939,GO:0008150,GO:0008324,GO:0009987,GO:0015075,GO:0015085,GO:0015267,GO:0015276,GO:0015278,GO:0016020,GO:0016021,GO:0022803,GO:0022832,GO:0022834,GO:0022836,GO:…
g4865.t1	6mA	GO:0000323,GO:0003008,GO:0003674,GO:0003824,GO:0004553,GO:0004559,GO:0005488,GO:0005575,GO:0005764,GO:0005773,GO:0005975,GO:0005996,GO:0006013,GO:0006464,GO:0006517,GO:0007610,GO:0007611,GO:0008150,GO:0008152,GO:0008270,GO:0009987,GO:0015923,GO:0016787,GO:0016798,GO:0019318,GO:0019538,GO:0030246,GO:0032501,GO:0036211,GO:0043167,GO:0043169,GO:0043170,GO:0043226,GO:0043227,GO:0043229,GO:0043231,GO:…
g28341.t1	6mA	GO:0000323,GO:0003674,GO:0003824,GO:0004175,GO:0004197,GO:0004843,GO:0005488,GO:0005515,GO:0005575,GO:0005764,GO:0005773,GO:0006464,GO:0006508,GO:0006511,GO:0008150,GO:0008152,GO:0008233,GO:0008234,GO:0008238,GO:0008242,GO:0008270,GO:0009056,GO:0009057,GO:0009893,GO:0009894,GO:0009896,GO:0009987,GO:0010604,GO:0016579,GO:0016787,GO:0019222,GO:0019538,GO:0019783,GO:0019941,GO:0030162,GO:0031323,GO:…
g59790.t1	6mA	GO:0000323,GO:0003674,GO:0003824,GO:0004175,GO:0004197,GO:0005575,GO:0005764,GO:0005773,GO:0006508,GO:0008150,GO:0008152,GO:0008233,GO:0008234,GO:0016787,GO:0019538,GO:0030260,GO:0040011,GO:0043170,GO:0043226,GO:0043227,GO:0043229,GO:0043231,GO:0044238,GO:0044409,GO:0044419,GO:0044424,GO:0044444,GO:0044464,GO:0046718,GO:0051701,GO:0051704,GO:0051806,GO:0051828,GO:0052126,GO:0052192,GO:0070011,GO:…
g20044.t1	6mA	GO:0000323,GO:0003674,GO:0003824,GO:0004553,GO:0004559,GO:0005488,GO:0005575,GO:0005764,GO:0005773,GO:0005975,GO:0005996,GO:0006013,GO:0008150,GO:0008152,GO:0008270,GO:0015923,GO:0016787,GO:0016798,GO:0019318,GO:0030246,GO:0043167,GO:0043169,GO:0043226,GO:0043227,GO:0043229,GO:0043231,GO:0044238,GO:0044424,GO:0044444,GO:0044464,GO:0044699,GO:0044710,GO:0044723,GO:0046872,GO:0046914,GO:0071704
g19506.t1	6mA	GO:0000339,GO:0003674,GO:0003676,GO:0003723,GO:0003729,GO:0003730,GO:0005488,GO:0005515,GO:0005575,GO:0005654,GO:0005737,GO:0006413,GO:0006417,GO:0007165,GO:0008150,GO:0008152,GO:0008190,GO:0008283,GO:0008494,GO:0009889,GO:0009891,GO:0009893,GO:0009894,GO:0009896,GO:0009987,GO:0010468,GO:0010506,GO:0010508,GO:0010556,GO:0010557,GO:0010604,GO:0010608,GO:0010628,GO:0010646,GO:0010647,GO:0016020,GO:…
g42219.t1	6mA	GO:0000375,GO:0000377,GO:0000398,GO:0000974,GO:0005575,GO:0005681,GO:0005730,GO:0006139,GO:0006396,GO:0006397,GO:0006725,GO:0006807,GO:0008150,GO:0008152,GO:0008380,GO:0009987,GO:0016070,GO:0016071,GO:0030529,GO:0032991,GO:0034641,GO:0043170,GO:0043226,GO:0043228,GO:0043229,GO:0043232,GO:0043234,GO:0044237,GO:0044238,GO:0044260,GO:0044422,GO:0044424,GO:0044428,GO:0044446,GO:0044464,GO:0046483,GO:…
g29915.t1	6mA	GO:0000375,GO:0000377,GO:0000398,GO:0003674,GO:0003676,GO:0003723,GO:0005488,GO:0005515,GO:0005575,GO:0005681,GO:0005684,GO:0006139,GO:0006396,GO:0006397,GO:0006725,GO:0006807,GO:0008150,GO:0008152,GO:0008380,GO:0009987,GO:0016070,GO:0016071,GO:0030529,GO:0032991,GO:0034641,GO:0043170,GO:0044237,GO:0044238,GO:0044260,GO:0044422,GO:0044424,GO:0044428,GO:0044446,GO:0044464,GO:0046483,GO:0071006,GO:…
g33360.t1	6mA	GO:0000375,GO:0000377,GO:0000398,GO:0003674,GO:0003676,GO:0003723,GO:0005488,GO:0005575,GO:0005634,GO:0005654,GO:0005681,GO:0005737,GO:0006139,GO:0006396,GO:0006397,GO:0006725,GO:0006807,GO:0006928,GO:0007409,GO:0007411,GO:0007528,GO:0008045,GO:0008150,GO:0008152,GO:0008380,GO:0009653,GO:0009987,GO:0015030,GO:0016043,GO:0016049,GO:0016070,GO:0016071,GO:0016358,GO:0016604,GO:0030018,GO:0030030,GO:…
g70502.t1	6mA	GO:0000413,GO:0003674,GO:0003755,GO:0003824,GO:0006457,GO:0006464,GO:0008150,GO:0008152,GO:0009987,GO:0016853,GO:0016859,GO:0018193,GO:0018208,GO:0019538,GO:0036211,GO:0043170,GO:0043412,GO:0044237,GO:0044238,GO:0044260,GO:0044267,GO:0071704
g31708.t1	6mA	GO:0000422,GO:0000423,GO:0003674,GO:0005215,GO:0005575,GO:0005739,GO:0005741,GO:0005742,GO:0006605,GO:0006626,GO:0006810,GO:0006839,GO:0006886,GO:0006914,GO:0006950,GO:0006996,GO:0007005,GO:0007006,GO:0007008,GO:0007154,GO:0008104,GO:0008150,GO:0008152,GO:0008320,GO:0008565,GO:0009056,GO:0009267,GO:0009605,GO:0009987,GO:0009991,GO:0010468,GO:0010608,GO:0015031,GO:0016020,GO:0016021,GO:0016043,GO:…
g37272.t1	6mA	GO:0000422,GO:0005575,GO:0005737,GO:0005741,GO:0006914,GO:0006950,GO:0006974,GO:0006996,GO:0007005,GO:0008150,GO:0008152,GO:0009056,GO:0009057,GO:0009987,GO:0016020,GO:0016043,GO:0019538,GO:0019867,GO:0022411,GO:0030163,GO:0031090,GO:0031966,GO:0031968,GO:0033554,GO:0035694,GO:0035695,GO:0043170,GO:0043226,GO:0043227,GO:0043229,GO:0043231,GO:0044237,GO:0044238,GO:0044248,GO:0044257,GO:0044260,GO:…
g43724.t1	6mA	GO:0000428,GO:0003674,GO:0003676,GO:0003677,GO:0003824,GO:0003899,GO:0003916,GO:0005488,GO:0005575,GO:0005634,GO:0005694,GO:0005730,GO:0005736,GO:0005829,GO:0006139,GO:0006259,GO:0006265,GO:0006351,GO:0006353,GO:0006360,GO:0006363,GO:0006725,GO:0006807,GO:0006996,GO:0008150,GO:0008152,GO:0008270,GO:0009058,GO:0009059,GO:0009987,GO:0016043,GO:0016070,GO:0016740,GO:0016772,GO:0016779,GO:0016853,GO:…
g69545.t1	6mA	GO:0000428,GO:0003674,GO:0003676,GO:0003677,GO:0003824,GO:0003899,GO:0005488,GO:0005575,GO:0005634,GO:0005654,GO:0005665,GO:0005666,GO:0005736,GO:0006139,GO:0006351,GO:0006360,GO:0006366,GO:0006383,GO:0006725,GO:0006807,GO:0008150,GO:0008152,GO:0009058,GO:0009059,GO:0009987,GO:0016070,GO:0016740,GO:0016772,GO:0016779,GO:0018130,GO:0019438,GO:0030880,GO:0032774,GO:0032991,GO:0034062,GO:0034641,GO:…
g62105.t1	6mA	GO:0000462,GO:0003674,GO:0003676,GO:0003723,GO:0005488,GO:0005515,GO:0005575,GO:0005634,GO:0005730,GO:0006139,GO:0006364,GO:0006725,GO:0006807,GO:0008150,GO:0008152,GO:0009987,GO:0016020,GO:0016070,GO:0016072,GO:0030490,GO:0030515,GO:0030529,GO:0030684,GO:0031090,GO:0031965,GO:0032040,GO:0032991,GO:0034388,GO:0034470,GO:0034641,GO:0034660,GO:0043170,GO:0043226,GO:0043227,GO:0043228,GO:0043229,GO:…
g30821.t1	6mA	GO:0000502,GO:0003674,GO:0003824,GO:0004175,GO:0004298,GO:0005575,GO:0005634,GO:0005654,GO:0005737,GO:0005829,GO:0005839,GO:0006508,GO:0006511,GO:0008150,GO:0008152,GO:0008233,GO:0009056,GO:0009057,GO:0009987,GO:0016787,GO:0019538,GO:0019773,GO:0019941,GO:0031982,GO:0031988,GO:0032991,GO:0043170,GO:0043226,GO:0043227,GO:0043229,GO:0043230,GO:0043231,GO:0043234,GO:0043632,GO:0044237,GO:0044238,GO:…
g37213.t1	6mA	GO:0000502,GO:0003674,GO:0003824,GO:0004175,GO:0004298,GO:0005575,GO:0005634,GO:0005654,GO:0005737,GO:0005829,GO:0005839,GO:0006508,GO:0006511,GO:0008150,GO:0008152,GO:0008233,GO:0009056,GO:0009057,GO:0009987,GO:0016787,GO:0019538,GO:0019773,GO:0019941,GO:0031982,GO:0031988,GO:0032991,GO:0043170,GO:0043226,GO:0043227,GO:0043229,GO:0043230,GO:0043231,GO:0043234,GO:0043632,GO:0044237,GO:0044238,GO:…
g50625.t1	6mA	GO:0000502,GO:0003674,GO:0003824,GO:0005488,GO:0005515,GO:0005575,GO:0005737,GO:0005886,GO:0006464,GO:0006508,GO:0006511,GO:0008150,GO:0008152,GO:0008233,GO:0008234,GO:0009056,GO:0009057,GO:0009987,GO:0016020,GO:0016579,GO:0016787,GO:0019538,GO:0019941,GO:0032403,GO:0032991,GO:0036211,GO:0036459,GO:0043170,GO:0043234,GO:0043412,GO:0043632,GO:0044237,GO:0044238,GO:0044248,GO:0044260,GO:0044265,GO:…
g12305.t1	6mA	GO:0000724,GO:0000725,GO:0000781,GO:0003674,GO:0003824,GO:0004842,GO:0005488,GO:0005575,GO:0005634,GO:0006139,GO:0006259,GO:0006281,GO:0006301,GO:0006302,GO:0006310,GO:0006464,GO:0006725,GO:0006807,GO:0006950,GO:0006974,GO:0008150,GO:0008152,GO:0008270,GO:0009987,GO:0016567,GO:0016740,GO:0016874,GO:0019538,GO:0019787,GO:0030915,GO:0032446,GO:0032991,GO:0033554,GO:0034641,GO:0036211,GO:0043167,GO:…
g38430.t1	6mA	GO:0000768,GO:0001932,GO:0001933,GO:0001942,GO:0003674,GO:0004857,GO:0004866,GO:0004867,GO:0005488,GO:0005515,GO:0005575,GO:0005615,GO:0005886,GO:0006949,GO:0008150,GO:0008285,GO:0009892,GO:0009966,GO:0009968,GO:0009986,GO:0009987,GO:0010563,GO:0010605,GO:0010646,GO:0010648,GO:0010837,GO:0010839,GO:0016020,GO:0017015,GO:0019220,GO:0019222,GO:0019838,GO:0019955,GO:0022404,GO:0022405,GO:0023051,GO:…
g29848.t1	6mA	GO:0000781,GO:0005575,GO:0005634,GO:0005737,GO:0016020,GO:0043226,GO:0043227,GO:0043229,GO:0043231,GO:0044422,GO:0044424,GO:0044427,GO:0044446,GO:0044464,GO:0098687
g15547.t1	6mA	GO:0000785,GO:0001955,GO:0002376,GO:0002682,GO:0002684,GO:0002697,GO:0002699,GO:0002831,GO:0002833,GO:0003674,GO:0003676,GO:0003682,GO:0003723,GO:0005488,GO:0005515,GO:0005575,GO:0005634,GO:0005737,GO:0006275,GO:0006950,GO:0006952,GO:0006955,GO:0007346,GO:0007492,GO:0008150,GO:0009605,GO:0009607,GO:0009617,GO:0009888,GO:0009889,GO:0009966,GO:0009967,GO:0010556,GO:0010564,GO:0010646,GO:0010647,GO:…
g68535.t1	6mA	GO:0000902,GO:0000904,GO:0001725,GO:0002064,GO:0003334,GO:0003382,GO:0003674,GO:0003676,GO:0003723,GO:0003779,GO:0005488,GO:0005515,GO:0005575,GO:0005737,GO:0005829,GO:0005856,GO:0005886,GO:0005903,GO:0005912,GO:0005924,GO:0005925,GO:0005938,GO:0006996,GO:0007010,GO:0007016,GO:0007165,GO:0007166,GO:0007519,GO:0008092,GO:0008150,GO:0009653,GO:0009888,GO:0009987,GO:0014706,GO:0015629,GO:0016020,GO:…
g62354.t1	6mA	GO:0000902,GO:0003674,GO:0003824,GO:0003924,GO:0005575,GO:0005737,GO:0005929,GO:0006457,GO:0007023,GO:0008150,GO:0008152,GO:0009653,GO:0009987,GO:0016043,GO:0016462,GO:0016787,GO:0016817,GO:0016818,GO:0017111,GO:0019538,GO:0031513,GO:0032391,GO:0032502,GO:0032989,GO:0042995,GO:0043170,GO:0043226,GO:0044237,GO:0044238,GO:0044260,GO:0044267,GO:0044424,GO:0044464,GO:0044699,GO:0044763,GO:0044767,GO:…
g65837.t1	6mA	GO:0000922,GO:0005575,GO:0005737,GO:0005814,GO:0005815,GO:0043226,GO:0043228,GO:0043229,GO:0043232,GO:0044422,GO:0044424,GO:0044430,GO:0044444,GO:0044446,GO:0044450,GO:0044464
g7011.t1	6mA	GO:0000975,GO:0000976,GO:0000977,GO:0000978,GO:0000981,GO:0000982,GO:0000987,GO:0001012,GO:0001067,GO:0001071,GO:0001077,GO:0001159,GO:0001228,GO:0003674,GO:0003676,GO:0003677,GO:0003700,GO:0005488,GO:0005575,GO:0005634,GO:0005829,GO:0006139,GO:0006351,GO:0006355,GO:0006357,GO:0006366,GO:0006725,GO:0006807,GO:0008150,GO:0008152,GO:0009058,GO:0009059,GO:0009743,GO:0009889,GO:0009891,GO:0009893,GO:…
g6050.t1	6mA	GO:0000975,GO:0000976,GO:0000977,GO:0000981,GO:0001012,GO:0001067,GO:0001071,GO:0003674,GO:0003676,GO:0003677,GO:0003700,GO:0004879,GO:0005488,GO:0005575,GO:0005634,GO:0006109,GO:0006139,GO:0006351,GO:0006355,GO:0006357,GO:0006725,GO:0006807,GO:0006950,GO:0007165,GO:0008150,GO:0008152,GO:0008270,GO:0009058,GO:0009059,GO:0009605,GO:0009755,GO:0009889,GO:0009987,GO:0009991,GO:0010468,GO:0010556,GO:…
g12942.t1	6mA	GO:0000975,GO:0000976,GO:0000977,GO:0001012,GO:0001067,GO:0001071,GO:0003674,GO:0003676,GO:0003677,GO:0003700,GO:0005488,GO:0005575,GO:0005634,GO:0006139,GO:0006351,GO:0006355,GO:0006725,GO:0006807,GO:0008150,GO:0008152,GO:0009058,GO:0009059,GO:0009889,GO:0009987,GO:0010468,GO:0010556,GO:0016070,GO:0018130,GO:0019219,GO:0019222,GO:0019438,GO:0031323,GO:0031326,GO:0032774,GO:0034641,GO:0034645,GO:…
g31097.t1	6mA	GO:0000975,GO:0001067,GO:0001555,GO:0001701,GO:0003006,GO:0003674,GO:0003676,GO:0003677,GO:0003824,GO:0005488,GO:0005515,GO:0005575,GO:0005634,GO:0005654,GO:0006139,GO:0006325,GO:0006342,GO:0006351,GO:0006355,GO:0006357,GO:0006464,GO:0006479,GO:0006725,GO:0006807,GO:0006996,GO:0007276,GO:0007281,GO:0007292,GO:0008150,GO:0008152,GO:0008168,GO:0008170,GO:0008213,GO:0008270,GO:0008276,GO:0008284,GO:…
g67192.t1	6mA	GO:0000975,GO:0001067,GO:0002064,GO:0003006,GO:0003674,GO:0003676,GO:0003677,GO:0005488,GO:0005575,GO:0005634,GO:0005654,GO:0005737,GO:0006139,GO:0006325,GO:0006349,GO:0006351,GO:0006355,GO:0006357,GO:0006464,GO:0006479,GO:0006725,GO:0006807,GO:0006996,GO:0007276,GO:0007283,GO:0008150,GO:0008152,GO:0008213,GO:0009058,GO:0009059,GO:0009889,GO:0009891,GO:0009892,GO:0009893,GO:0009987,GO:0010467,GO:…
g65143.t1	6mA	GO:0000975,GO:0001067,GO:0003674,GO:0003676,GO:0003677,GO:0003682,GO:0005488,GO:0005515,GO:0005575,GO:0005634,GO:0006139,GO:0006351,GO:0006355,GO:0006725,GO:0006807,GO:0006915,GO:0008150,GO:0008152,GO:0008219,GO:0009058,GO:0009059,GO:0009889,GO:0009891,GO:0009893,GO:0009987,GO:0010468,GO:0010556,GO:0010557,GO:0010604,GO:0010628,GO:0010941,GO:0012501,GO:0016070,GO:0016265,GO:0018130,GO:0019219,GO:…
g4968.t1	6mA	GO:0000981,GO:0000982,GO:0001071,GO:0001077,GO:0001228,GO:0003674,GO:0003676,GO:0003677,GO:0003682,GO:0003700,GO:0005488,GO:0005575,GO:0005634,GO:0006355,GO:0008150,GO:0009889,GO:0009966,GO:0009967,GO:0009968,GO:0010468,GO:0010556,GO:0010646,GO:0010647,GO:0010648,GO:0010941,GO:0019219,GO:0019222,GO:0023051,GO:0023056,GO:0023057,GO:0031323,GO:0031326,GO:0042981,GO:0043066,GO:0043067,GO:0043069,GO:…
g18225.t1	6mA	GO:0000981,GO:0001071,GO:0001655,GO:0001756,GO:0003002,GO:0003008,GO:0003674,GO:0003676,GO:0003677,GO:0003700,GO:0005488,GO:0005575,GO:0005634,GO:0006139,GO:0006351,GO:0006355,GO:0006357,GO:0006725,GO:0006807,GO:0006810,GO:0006928,GO:0007154,GO:0007389,GO:0007412,GO:0007589,GO:0007595,GO:0007610,GO:0007611,GO:0007612,GO:0007632,GO:0008150,GO:0008152,GO:0008306,GO:0008542,GO:0009058,GO:0009059,GO:…
g55426.t1	6mA	GO:0000981,GO:0001071,GO:0003674,GO:0003676,GO:0003677,GO:0003700,GO:0003707,GO:0004871,GO:0004872,GO:0004879,GO:0005488,GO:0005575,GO:0005634,GO:0006139,GO:0006351,GO:0006355,GO:0006725,GO:0006807,GO:0007165,GO:0008150,GO:0008152,GO:0008270,GO:0008434,GO:0009058,GO:0009059,GO:0009755,GO:0009889,GO:0009987,GO:0010468,GO:0010556,GO:0016070,GO:0018130,GO:0019219,GO:0019222,GO:0019438,GO:0031323,GO:…
g13348.t1	6mA	GO:0000981,GO:0001071,GO:0003674,GO:0003676,GO:0003677,GO:0003700,GO:0005488,GO:0005575,GO:0005634,GO:0006139,GO:0006351,GO:0006355,GO:0006357,GO:0006725,GO:0006807,GO:0008150,GO:0008152,GO:0009058,GO:0009059,GO:0009653,GO:0009889,GO:0009987,GO:0010468,GO:0010556,GO:0016070,GO:0018130,GO:0019219,GO:0019222,GO:0019438,GO:0030154,GO:0031323,GO:0031326,GO:0032502,GO:0032774,GO:0034641,GO:0034645,GO:…
g60459.t1	6mA	GO:0000988,GO:0000989,GO:0003674,GO:0003712,GO:0005488,GO:0006139,GO:0006351,GO:0006355,GO:0006357,GO:0006725,GO:0006807,GO:0007369,GO:0007498,GO:0008150,GO:0008152,GO:0008270,GO:0009058,GO:0009059,GO:0009653,GO:0009888,GO:0009889,GO:0009891,GO:0009893,GO:0009987,GO:0010468,GO:0010556,GO:0010557,GO:0010604,GO:0010628,GO:0010721,GO:0016070,GO:0018130,GO:0019219,GO:0019222,GO:0019438,GO:0031323,GO:…
g5578.t1	6mA	GO:0001071,GO:0001843,GO:0003674,GO:0003676,GO:0003677,GO:0003700,GO:0005488,GO:0005575,GO:0005634,GO:0006355,GO:0008150,GO:0009889,GO:0009987,GO:0010468,GO:0010556,GO:0019219,GO:0019222,GO:0030154,GO:0030900,GO:0031323,GO:0031326,GO:0032502,GO:0035148,GO:0043167,GO:0043169,GO:0043226,GO:0043227,GO:0043229,GO:0043231,GO:0044424,GO:0044464,GO:0044699,GO:0044763,GO:0044767,GO:0046872,GO:0048646,GO:…
g34646.t1	6mA	GO:0001071,GO:0003674,GO:0003676,GO:0003677,GO:0003700,GO:0003707,GO:0004871,GO:0004872,GO:0005488,GO:0005496,GO:0005575,GO:0005634,GO:0006139,GO:0006351,GO:0006355,GO:0006725,GO:0006807,GO:0007165,GO:0008150,GO:0008152,GO:0008270,GO:0008289,GO:0009058,GO:0009059,GO:0009755,GO:0009889,GO:0009987,GO:0010468,GO:0010556,GO:0016070,GO:0018130,GO:0019219,GO:0019222,GO:0019438,GO:0030284,GO:0030518,GO:…
g44106.t1	6mA	GO:0001071,GO:0003674,GO:0003676,GO:0003677,GO:0003700,GO:0005488,GO:0005575,GO:0005634,GO:0006139,GO:0006351,GO:0006355,GO:0006725,GO:0006807,GO:0007165,GO:0008150,GO:0008152,GO:0008270,GO:0009058,GO:0009059,GO:0009755,GO:0009889,GO:0009987,GO:0010468,GO:0010556,GO:0016070,GO:0018130,GO:0019219,GO:0019222,GO:0019438,GO:0031323,GO:0031326,GO:0032774,GO:0034641,GO:0034645,GO:0034654,GO:0043167,GO:…
g13800.t1	6mA	GO:0001071,GO:0003674,GO:0003676,GO:0003677,GO:0003700,GO:0005488,GO:0005575,GO:0005634,GO:0006139,GO:0006351,GO:0006355,GO:0006725,GO:0006807,GO:0007165,GO:0008150,GO:0008152,GO:0009058,GO:0009059,GO:0009889,GO:0009987,GO:0010468,GO:0010556,GO:0016070,GO:0018130,GO:0019219,GO:0019222,GO:0019438,GO:0031323,GO:0031326,GO:0032774,GO:0034641,GO:0034645,GO:0034654,GO:0035329,GO:0035556,GO:0043170,GO:…
g34029.t1	6mA	GO:0001071,GO:0003674,GO:0003676,GO:0003677,GO:0003700,GO:0005488,GO:0005575,GO:0005634,GO:0006139,GO:0006351,GO:0006355,GO:0006725,GO:0006807,GO:0008150,GO:0008152,GO:0009058,GO:0009059,GO:0009889,GO:0009891,GO:0009893,GO:0009987,GO:0010468,GO:0010556,GO:0010557,GO:0010604,GO:0010628,GO:0016070,GO:0018130,GO:0019219,GO:0019222,GO:0019438,GO:0031323,GO:0031325,GO:0031326,GO:0031328,GO:0032774,GO:…
g45818.t1	6mA	GO:0001071,GO:0003674,GO:0003676,GO:0003677,GO:0003700,GO:0005488,GO:0005575,GO:0005634,GO:0006139,GO:0006351,GO:0006355,GO:0006725,GO:0006807,GO:0008150,GO:0008152,GO:0009058,GO:0009059,GO:0009889,GO:0009987,GO:0010468,GO:0010556,GO:0016070,GO:0018130,GO:0019219,GO:0019222,GO:0019438,GO:0031323,GO:0031326,GO:0032774,GO:0034641,GO:0034645,GO:0034654,GO:0043170,GO:0043226,GO:0043227,GO:0043229,GO:…
g24108.t1	6mA	GO:0001071,GO:0003674,GO:0003676,GO:0003677,GO:0003700,GO:0005488,GO:0005575,GO:0005634,GO:0006355,GO:0008150,GO:0009653,GO:0009886,GO:0009889,GO:0010468,GO:0010556,GO:0019219,GO:0019222,GO:0031323,GO:0031326,GO:0032502,GO:0043226,GO:0043227,GO:0043229,GO:0043231,GO:0044424,GO:0044464,GO:0050789,GO:0050794,GO:0051171,GO:0051252,GO:0060255,GO:0065007,GO:0080090,GO:0097159,GO:1901363,GO:1903506,GO:…
g44199.t1	6mA	GO:0001071,GO:0003674,GO:0003676,GO:0003677,GO:0003700,GO:0005488,GO:0005575,GO:0005634,GO:0006355,GO:0008150,GO:0009889,GO:0010468,GO:0010556,GO:0019219,GO:0019222,GO:0031323,GO:0031326,GO:0043167,GO:0043169,GO:0043226,GO:0043227,GO:0043229,GO:0043231,GO:0044424,GO:0044464,GO:0046872,GO:0050789,GO:0050794,GO:0051171,GO:0051252,GO:0060255,GO:0065007,GO:0080090,GO:0097159,GO:1901363,GO:1903506,GO:…
g73781.t1	6mA	GO:0001071,GO:0003674,GO:0003676,GO:0003677,GO:0003700,GO:0005488,GO:0005575,GO:0005634,GO:0007275,GO:0008150,GO:0032501,GO:0032502,GO:0043226,GO:0043227,GO:0043229,GO:0043231,GO:0043565,GO:0044424,GO:0044464,GO:0044699,GO:0044707,GO:0044767,GO:0097159,GO:1901363
g37738.t1	6mA	GO:0001071,GO:0003674,GO:0003700,GO:0005488,GO:0005515,GO:0006355,GO:0008150,GO:0009653,GO:0009889,GO:0010468,GO:0010556,GO:0019219,GO:0019222,GO:0031323,GO:0031326,GO:0032502,GO:0050789,GO:0050794,GO:0051171,GO:0051252,GO:0060255,GO:0065007,GO:0080090,GO:1903506,GO:2000112,GO:2001141
g20428.t1	6mA	GO:0001071,GO:0003674,GO:0003700,GO:0005488,GO:0005543,GO:0005575,GO:0005737,GO:0005929,GO:0006355,GO:0006464,GO:0007165,GO:0008104,GO:0008150,GO:0008152,GO:0008289,GO:0009889,GO:0009987,GO:0010468,GO:0010556,GO:0016567,GO:0019219,GO:0019222,GO:0019538,GO:0031323,GO:0031326,GO:0032446,GO:0033036,GO:0033365,GO:0034613,GO:0035091,GO:0035556,GO:0036211,GO:0042995,GO:0043167,GO:0043168,GO:0043170,GO:…
g17997.t1	6mA	GO:0001101,GO:0001607,GO:0001653,GO:0003674,GO:0004871,GO:0004872,GO:0004888,GO:0004930,GO:0005575,GO:0006810,GO:0006950,GO:0007154,GO:0007165,GO:0007166,GO:0007186,GO:0007218,GO:0007589,GO:0008150,GO:0008188,GO:0008528,GO:0009269,GO:0009414,GO:0009415,GO:0009605,GO:0009628,GO:0009987,GO:0009991,GO:0010035,GO:0010959,GO:0016020,GO:0016021,GO:0016323,GO:0030594,GO:0031224,GO:0031668,GO:0032501,GO:…
g49977.t1	6mA	GO:0001101,GO:0001607,GO:0001653,GO:0003674,GO:0004871,GO:0004872,GO:0004888,GO:0004930,GO:0005575,GO:0006810,GO:0006950,GO:0007154,GO:0007165,GO:0007166,GO:0007186,GO:0007218,GO:0007589,GO:0008150,GO:0008188,GO:0008528,GO:0009269,GO:0009414,GO:0009415,GO:0009605,GO:0009628,GO:0009987,GO:0009991,GO:0010035,GO:0010959,GO:0016020,GO:0016021,GO:0016323,GO:0030594,GO:0031224,GO:0031668,GO:0032501,GO:…
g11240.t1	6mA	GO:0001101,GO:0003674,GO:0003676,GO:0003677,GO:0005488,GO:0005575,GO:0005634,GO:0006139,GO:0006351,GO:0006355,GO:0006725,GO:0006807,GO:0007399,GO:0007423,GO:0007476,GO:0007480,GO:0007610,GO:0007631,GO:0008049,GO:0008150,GO:0008152,GO:0008343,GO:0009058,GO:0009059,GO:0009415,GO:0009628,GO:0009653,GO:0009886,GO:0009889,GO:0009987,GO:0010035,GO:0010468,GO:0010556,GO:0016070,GO:0018130,GO:0019098,GO:…
g64565.t1	6mA	GO:0001101,GO:0003674,GO:0003676,GO:0003723,GO:0003824,GO:0003968,GO:0005488,GO:0006139,GO:0006396,GO:0006725,GO:0006807,GO:0006950,GO:0006952,GO:0008150,GO:0008152,GO:0009058,GO:0009605,GO:0009607,GO:0009615,GO:0009751,GO:0009987,GO:0010025,GO:0010033,GO:0010166,GO:0014070,GO:0016070,GO:0016740,GO:0016772,GO:0016779,GO:0030422,GO:0031050,GO:0034062,GO:0034641,GO:0042221,GO:0043170,GO:0043207,GO:…
g6906.t1	6mA	GO:0001101,GO:0003674,GO:0004871,GO:0004872,GO:0004888,GO:0004970,GO:0005215,GO:0005216,GO:0005230,GO:0005231,GO:0005234,GO:0005261,GO:0005262,GO:0005575,GO:0005622,GO:0005886,GO:0006810,GO:0006811,GO:0006812,GO:0006816,GO:0007165,GO:0008066,GO:0008150,GO:0008324,GO:0009719,GO:0009987,GO:0010033,GO:0010243,GO:0015075,GO:0015085,GO:0015267,GO:0015276,GO:0016020,GO:0016021,GO:0019722,GO:0019932,GO:…
g21968.t1	6mA	GO:0001306,GO:0001588,GO:0001963,GO:0003008,GO:0003674,GO:0004871,GO:0004872,GO:0004888,GO:0004930,GO:0004935,GO:0004952,GO:0005488,GO:0005575,GO:0005886,GO:0005887,GO:0006950,GO:0006979,GO:0007154,GO:0007165,GO:0007166,GO:0007186,GO:0007187,GO:0007188,GO:0007189,GO:0007191,GO:0007200,GO:0007212,GO:0007267,GO:0007268,GO:0007270,GO:0007610,GO:0007611,GO:0007612,GO:0008150,GO:0008226,GO:0008227,GO:…
g72342.t1	6mA	GO:0001501,GO:0001649,GO:0001657,GO:0003674,GO:0005488,GO:0005509,GO:0005515,GO:0005539,GO:0005540,GO:0005575,GO:0005576,GO:0005578,GO:0005615,GO:0006022,GO:0006030,GO:0006040,GO:0006807,GO:0006928,GO:0007155,GO:0007417,GO:0007507,GO:0008061,GO:0008150,GO:0008152,GO:0008347,GO:0009888,GO:0009987,GO:0010921,GO:0016020,GO:0016477,GO:0019220,GO:0019222,GO:0019899,GO:0019902,GO:0019903,GO:0022610,GO:…
g57743.t1	6mA	GO:0001503,GO:0001523,GO:0001525,GO:0001958,GO:0002062,GO:0003674,GO:0005488,GO:0005515,GO:0005575,GO:0005576,GO:0005605,GO:0005615,GO:0005775,GO:0005796,GO:0005886,GO:0005912,GO:0005924,GO:0005925,GO:0005975,GO:0006022,GO:0006023,GO:0006024,GO:0006026,GO:0006027,GO:0006082,GO:0006629,GO:0006720,GO:0006721,GO:0006790,GO:0006807,GO:0007165,GO:0007420,GO:0007602,GO:0007603,GO:0008022,GO:0008104,GO:…
g11497.t1	6mA	GO:0001503,GO:0001658,GO:0001763,GO:0002009,GO:0003007,GO:0003674,GO:0005488,GO:0005509,GO:0005575,GO:0005622,GO:0005886,GO:0007009,GO:0007155,GO:0007156,GO:0007157,GO:0007165,GO:0008150,GO:0009653,GO:0009887,GO:0009987,GO:0016020,GO:0016021,GO:0016043,GO:0021987,GO:0022008,GO:0022610,GO:0030030,GO:0030154,GO:0030856,GO:0031224,GO:0031982,GO:0031988,GO:0032501,GO:0032502,GO:0035239,GO:0035295,GO:…
g59643.t1	6mA	GO:0001504,GO:0001505,GO:0003674,GO:0005215,GO:0005326,GO:0005328,GO:0005329,GO:0005330,GO:0005488,GO:0005575,GO:0005887,GO:0006810,GO:0006811,GO:0006812,GO:0006820,GO:0006836,GO:0007610,GO:0007622,GO:0007623,GO:0008144,GO:0008150,GO:0008324,GO:0008504,GO:0008509,GO:0008519,GO:0009987,GO:0015075,GO:0015077,GO:0015081,GO:0015101,GO:0015103,GO:0015291,GO:0015293,GO:0015294,GO:0015370,GO:0015672,GO:…
g25741.t1	6mA	GO:0001505,GO:0003674,GO:0003824,GO:0003990,GO:0004104,GO:0005575,GO:0005615,GO:0008150,GO:0008152,GO:0009056,GO:0009987,GO:0016787,GO:0016788,GO:0030054,GO:0042133,GO:0042135,GO:0044237,GO:0044248,GO:0044421,GO:0045202,GO:0052689,GO:0065007,GO:0065008
g66451.t1	6mA	GO:0001508,GO:0001661,GO:0001666,GO:0001775,GO:0002376,GO:0002682,GO:0002684,GO:0002694,GO:0002696,GO:0003008,GO:0003012,GO:0003674,GO:0004871,GO:0004872,GO:0004888,GO:0004889,GO:0005215,GO:0005216,GO:0005230,GO:0005231,GO:0005261,GO:0005488,GO:0005575,GO:0005886,GO:0005892,GO:0006461,GO:0006810,GO:0006811,GO:0006812,GO:0006816,GO:0006936,GO:0006939,GO:0006950,GO:0007154,GO:0007165,GO:0007267,GO:…
g29278.t1	6mA	GO:0001508,GO:0001964,GO:0003008,GO:0003674,GO:0005215,GO:0005216,GO:0005244,GO:0005249,GO:0005251,GO:0005261,GO:0005267,GO:0005575,GO:0005783,GO:0005829,GO:0005887,GO:0006461,GO:0006810,GO:0006811,GO:0006812,GO:0006813,GO:0006937,GO:0007154,GO:0007165,GO:0007405,GO:0008076,GO:0008104,GO:0008150,GO:0008283,GO:0008324,GO:0009581,GO:0009582,GO:0009605,GO:0009612,GO:0009628,GO:0009986,GO:0009987,GO:…
g34229.t1	6mA	GO:0001508,GO:0003008,GO:0003009,GO:0003012,GO:0003674,GO:0004871,GO:0004872,GO:0004888,GO:0004889,GO:0005215,GO:0005216,GO:0005230,GO:0005231,GO:0005261,GO:0005488,GO:0005575,GO:0005892,GO:0006810,GO:0006811,GO:0006812,GO:0006936,GO:0006941,GO:0007154,GO:0007267,GO:0007268,GO:0007271,GO:0007274,GO:0007528,GO:0008150,GO:0008324,GO:0009719,GO:0009986,GO:0009987,GO:0010033,GO:0010243,GO:0014070,GO:…
g37761.t1	6mA	GO:0001523,GO:0003008,GO:0003674,GO:0003824,GO:0005575,GO:0005788,GO:0006066,GO:0006629,GO:0006720,GO:0006721,GO:0007600,GO:0007601,GO:0008150,GO:0008152,GO:0009987,GO:0010817,GO:0016020,GO:0016101,GO:0016491,GO:0031974,GO:0032501,GO:0034308,GO:0034754,GO:0042445,GO:0042572,GO:0043233,GO:0044237,GO:0044238,GO:0044255,GO:0044281,GO:0044297,GO:0044422,GO:0044424,GO:0044432,GO:0044444,GO:0044446,GO:…
g22783.t1	6mA	GO:0001525,GO:0001618,GO:0003674,GO:0003824,GO:0004177,GO:0004872,GO:0005488,GO:0005575,GO:0005737,GO:0005886,GO:0006508,GO:0006518,GO:0006807,GO:0008150,GO:0008152,GO:0008233,GO:0008235,GO:0008237,GO:0008238,GO:0008270,GO:0009056,GO:0009987,GO:0016020,GO:0016021,GO:0016787,GO:0019538,GO:0030154,GO:0031224,GO:0032502,GO:0033218,GO:0034641,GO:0042277,GO:0043167,GO:0043169,GO:0043170,GO:0043171,GO:…
g55404.t1	6mA	GO:0001525,GO:0001936,GO:0001938,GO:0003674,GO:0003824,GO:0004175,GO:0004197,GO:0004198,GO:0005488,GO:0005509,GO:0005515,GO:0005575,GO:0005634,GO:0005737,GO:0005768,GO:0005783,GO:0005789,GO:0006810,GO:0006886,GO:0006915,GO:0006919,GO:0006950,GO:0007165,GO:0007166,GO:0007167,GO:0007169,GO:0008104,GO:0008150,GO:0008152,GO:0008219,GO:0008233,GO:0008234,GO:0008284,GO:0009266,GO:0009408,GO:0009628,GO:…
g64972.t1	6mA	GO:0001525,GO:0001990,GO:0002003,GO:0002005,GO:0003008,GO:0003044,GO:0003073,GO:0003081,GO:0003674,GO:0003824,GO:0004177,GO:0005488,GO:0005575,GO:0005765,GO:0005774,GO:0005886,GO:0005887,GO:0005903,GO:0006518,GO:0006807,GO:0006928,GO:0007154,GO:0007267,GO:0008150,GO:0008152,GO:0008217,GO:0008233,GO:0008235,GO:0008237,GO:0008238,GO:0008270,GO:0008283,GO:0009056,GO:0009057,GO:0009897,GO:0009987,GO:…
g62529.t1	6mA	GO:0001530,GO:0001817,GO:0002218,GO:0002221,GO:0002224,GO:0002253,GO:0002376,GO:0002682,GO:0002684,GO:0002697,GO:0002700,GO:0002718,GO:0002757,GO:0002758,GO:0002764,GO:0003674,GO:0005488,GO:0005515,GO:0005575,GO:0006950,GO:0006952,GO:0006954,GO:0006955,GO:0007165,GO:0008150,GO:0008289,GO:0031347,GO:0031349,GO:0032991,GO:0034142,GO:0043234,GO:0043235,GO:0044425,GO:0045087,GO:0045088,GO:0045089,GO:…
g49300.t1	6mA	GO:0001541,GO:0003006,GO:0003674,GO:0003824,GO:0004105,GO:0005575,GO:0005737,GO:0005789,GO:0006066,GO:0006576,GO:0006629,GO:0006644,GO:0006650,GO:0006656,GO:0006657,GO:0006793,GO:0006796,GO:0006807,GO:0007276,GO:0007283,GO:0008150,GO:0008152,GO:0008610,GO:0008654,GO:0009058,GO:0009308,GO:0009987,GO:0016020,GO:0016740,GO:0016772,GO:0016779,GO:0019637,GO:0022414,GO:0022602,GO:0031090,GO:0032502,GO:…
g27784.t1	6mA	GO:0001558,GO:0001736,GO:0001737,GO:0001738,GO:0002009,GO:0003674,GO:0005488,GO:0005575,GO:0005737,GO:0005886,GO:0007163,GO:0007164,GO:0007389,GO:0008104,GO:0008150,GO:0008270,GO:0008593,GO:0009653,GO:0009798,GO:0009886,GO:0009948,GO:0009966,GO:0009968,GO:0009987,GO:0010646,GO:0010648,GO:0010720,GO:0010769,GO:0010770,GO:0010975,GO:0010976,GO:0016020,GO:0016348,GO:0022603,GO:0022604,GO:0023051,GO:…
g4396.t1	6mA	GO:0001558,GO:0001764,GO:0003674,GO:0005102,GO:0005488,GO:0005509,GO:0005515,GO:0005539,GO:0005575,GO:0005576,GO:0005578,GO:0005615,GO:0006928,GO:0007165,GO:0007166,GO:0007411,GO:0008150,GO:0008201,GO:0009987,GO:0010721,GO:0010769,GO:0010771,GO:0010975,GO:0010977,GO:0016049,GO:0016477,GO:0022603,GO:0022604,GO:0030308,GO:0030516,GO:0030517,GO:0031012,GO:0031344,GO:0031345,GO:0032101,GO:0032102,GO:…
g70524.t1	6mA	GO:0001588,GO:0001963,GO:0003008,GO:0003674,GO:0004871,GO:0004872,GO:0004888,GO:0004930,GO:0004952,GO:0005488,GO:0005575,GO:0005887,GO:0006950,GO:0007154,GO:0007165,GO:0007166,GO:0007186,GO:0007187,GO:0007188,GO:0007189,GO:0007191,GO:0007212,GO:0007267,GO:0007268,GO:0007270,GO:0007610,GO:0007611,GO:0007612,GO:0007613,GO:0007632,GO:0007635,GO:0008150,GO:0008306,GO:0008355,GO:0008542,GO:0009266,GO:…
g11602.t1	6mA	GO:0001637,GO:0001653,GO:0003674,GO:0004871,GO:0004872,GO:0004888,GO:0004896,GO:0004930,GO:0004950,GO:0005575,GO:0006935,GO:0007165,GO:0007166,GO:0007186,GO:0008150,GO:0008528,GO:0016021,GO:0020002,GO:0031224,GO:0033643,GO:0033644,GO:0038023,GO:0040011,GO:0042330,GO:0044217,GO:0044218,GO:0044279,GO:0044421,GO:0044425,GO:0050789,GO:0050794,GO:0060089,GO:0065007
g54167.t1	6mA	GO:0001649,GO:0003674,GO:0003676,GO:0003723,GO:0003824,GO:0004518,GO:0005488,GO:0005575,GO:0005634,GO:0005739,GO:0006139,GO:0006351,GO:0006355,GO:0006725,GO:0006807,GO:0008150,GO:0008152,GO:0009058,GO:0009059,GO:0009889,GO:0009892,GO:0009987,GO:0010468,GO:0010556,GO:0010605,GO:0010629,GO:0016020,GO:0016023,GO:0016070,GO:0016442,GO:0016458,GO:0016787,GO:0016788,GO:0018130,GO:0019219,GO:0019222,GO:…
g70651.t1	6mA	GO:0001653,GO:0003674,GO:0004871,GO:0004872,GO:0004888,GO:0004930,GO:0004983,GO:0005575,GO:0005886,GO:0007165,GO:0007166,GO:0007186,GO:0008150,GO:0008188,GO:0008528,GO:0016020,GO:0016021,GO:0030594,GO:0031224,GO:0038023,GO:0044425,GO:0044464,GO:0050789,GO:0050794,GO:0060089,GO:0065007
g46672.t1	6mA	GO:0001653,GO:0003674,GO:0004871,GO:0004872,GO:0004888,GO:0004930,GO:0004994,GO:0005488,GO:0005575,GO:0005887,GO:0007165,GO:0007166,GO:0007186,GO:0007187,GO:0008150,GO:0008188,GO:0008285,GO:0008528,GO:0009719,GO:0009725,GO:0009755,GO:0009987,GO:0010033,GO:0010243,GO:0014070,GO:0016021,GO:0030594,GO:0031224,GO:0031226,GO:0031960,GO:0032870,GO:0033218,GO:0033993,GO:0038023,GO:0038169,GO:0038170,GO:…
g25668.t1	6mA	GO:0001653,GO:0003674,GO:0004871,GO:0004872,GO:0004888,GO:0004930,GO:0005575,GO:0005886,GO:0007165,GO:0007166,GO:0007186,GO:0007610,GO:0007621,GO:0008150,GO:0008528,GO:0016020,GO:0016021,GO:0019098,GO:0022414,GO:0031224,GO:0032501,GO:0033057,GO:0038023,GO:0043900,GO:0044425,GO:0044464,GO:0044703,GO:0044705,GO:0044706,GO:0045434,GO:0045924,GO:0046008,GO:0046662,GO:0048042,GO:0048583,GO:0048609,GO:…
g29327.t1	6mA	GO:0001662,GO:0002209,GO:0003674,GO:0004871,GO:0005575,GO:0005834,GO:0005886,GO:0006091,GO:0006112,GO:0006950,GO:0006952,GO:0007154,GO:0007165,GO:0007166,GO:0007167,GO:0007168,GO:0007186,GO:0007267,GO:0007268,GO:0007610,GO:0007626,GO:0008150,GO:0008152,GO:0008277,GO:0009719,GO:0009725,GO:0009966,GO:0009987,GO:0010033,GO:0010243,GO:0010646,GO:0015980,GO:0016020,GO:0023051,GO:0023052,GO:0031982,GO:…
g22807.t1	6mA	GO:0001664,GO:0002064,GO:0002090,GO:0002092,GO:0003402,GO:0003674,GO:0004871,GO:0005102,GO:0005198,GO:0005488,GO:0005515,GO:0005575,GO:0005634,GO:0005737,GO:0005768,GO:0005770,GO:0005886,GO:0005911,GO:0005923,GO:0006461,GO:0006810,GO:0007050,GO:0007165,GO:0007166,GO:0008104,GO:0008150,GO:0008285,GO:0009719,GO:0009893,GO:0009966,GO:0009968,GO:0009987,GO:0010033,GO:0010562,GO:0010604,GO:0010646,GO:…
g73474.t1	6mA	GO:0001664,GO:0003674,GO:0005085,GO:0005088,GO:0005089,GO:0005096,GO:0005102,GO:0005488,GO:0005515,GO:0005575,GO:0005737,GO:0007165,GO:0007166,GO:0007186,GO:0008047,GO:0008150,GO:0009966,GO:0010646,GO:0016020,GO:0023051,GO:0030234,GO:0030695,GO:0031982,GO:0031988,GO:0035023,GO:0035556,GO:0043226,GO:0043227,GO:0043230,GO:0044421,GO:0044424,GO:0044464,GO:0046578,GO:0048583,GO:0050789,GO:0050794,GO:…
g13344.t1	6mA	GO:0001666,GO:0003674,GO:0004871,GO:0004872,GO:0005057,GO:0005215,GO:0005216,GO:0005217,GO:0005220,GO:0005261,GO:0005262,GO:0005488,GO:0005543,GO:0005575,GO:0005737,GO:0005783,GO:0005789,GO:0005886,GO:0005938,GO:0006810,GO:0006811,GO:0006812,GO:0006816,GO:0006950,GO:0007165,GO:0008150,GO:0008289,GO:0008324,GO:0009628,GO:0009719,GO:0009987,GO:0010033,GO:0010243,GO:0014070,GO:0014074,GO:0015075,GO:…
g53645.t1	6mA	GO:0001674,GO:0003674,GO:0003824,GO:0005488,GO:0005515,GO:0005575,GO:0005634,GO:0005654,GO:0005730,GO:0008022,GO:0015030,GO:0015036,GO:0016020,GO:0016491,GO:0016604,GO:0016667,GO:0042802,GO:0043073,GO:0043226,GO:0043227,GO:0043228,GO:0043229,GO:0043231,GO:0043232,GO:0044422,GO:0044424,GO:0044428,GO:0044446,GO:0044451,GO:0044464
g40401.t1	6mA	GO:0001725,GO:0003674,GO:0005488,GO:0005509,GO:0005515,GO:0005575,GO:0007155,GO:0008092,GO:0008150,GO:0016337,GO:0016459,GO:0016460,GO:0017022,GO:0022610,GO:0030018,GO:0032036,GO:0032432,GO:0032991,GO:0034109,GO:0042641,GO:0043167,GO:0043169,GO:0043234,GO:0044422,GO:0044424,GO:0044430,GO:0044444,GO:0044446,GO:0044449,GO:0044464,GO:0044699,GO:0046872,GO:0070527,GO:0098602
g17720.t1	6mA	GO:0001731,GO:0003674,GO:0003676,GO:0003723,GO:0003743,GO:0005488,GO:0005515,GO:0005575,GO:0005852,GO:0006413,GO:0006417,GO:0006446,GO:0008135,GO:0008150,GO:0008152,GO:0009889,GO:0009987,GO:0010468,GO:0010556,GO:0010608,GO:0016043,GO:0016282,GO:0019222,GO:0022607,GO:0022618,GO:0030529,GO:0031323,GO:0031326,GO:0031369,GO:0032268,GO:0032991,GO:0033290,GO:0034622,GO:0043021,GO:0043022,GO:0043234,GO:…
g5544.t1	6mA	GO:0001763,GO:0002009,GO:0002011,GO:0003674,GO:0005198,GO:0005201,GO:0005488,GO:0005575,GO:0005576,GO:0005578,GO:0005604,GO:0005605,GO:0005606,GO:0005608,GO:0005615,GO:0005911,GO:0006464,GO:0006468,GO:0006793,GO:0006796,GO:0007155,GO:0007163,GO:0007165,GO:0007166,GO:0008150,GO:0008152,GO:0008289,GO:0009653,GO:0009888,GO:0009987,GO:0016043,GO:0016310,GO:0019538,GO:0022610,GO:0030010,GO:0030030,GO:…
g42794.t1	6mA	GO:0001763,GO:0002009,GO:0002070,GO:0003006,GO:0003674,GO:0003824,GO:0004842,GO:0005102,GO:0005123,GO:0005126,GO:0005488,GO:0005515,GO:0005575,GO:0005634,GO:0005654,GO:0005737,GO:0006464,GO:0006915,GO:0008150,GO:0008152,GO:0008219,GO:0009653,GO:0009966,GO:0009987,GO:0010564,GO:0010646,GO:0010941,GO:0012501,GO:0016265,GO:0016567,GO:0016740,GO:0019222,GO:0019538,GO:0019787,GO:0021700,GO:0022414,GO:…
g11222.t1	6mA	GO:0001764,GO:0003002,GO:0003341,GO:0003674,GO:0004871,GO:0004872,GO:0004888,GO:0004930,GO:0005488,GO:0005509,GO:0005575,GO:0005737,GO:0005886,GO:0006355,GO:0006810,GO:0006928,GO:0006996,GO:0007017,GO:0007018,GO:0007155,GO:0007156,GO:0007165,GO:0007166,GO:0007186,GO:0007276,GO:0007283,GO:0007389,GO:0007589,GO:0008150,GO:0009653,GO:0009889,GO:0009952,GO:0009987,GO:0010468,GO:0010556,GO:0010927,GO:…
g37092.t1	6mA	GO:0001765,GO:0003674,GO:0005488,GO:0005515,GO:0005543,GO:0005575,GO:0005654,GO:0005768,GO:0005769,GO:0005829,GO:0005856,GO:0005901,GO:0005911,GO:0005912,GO:0005924,GO:0005925,GO:0006810,GO:0006897,GO:0006898,GO:0006996,GO:0007009,GO:0007010,GO:0008104,GO:0008150,GO:0008289,GO:0009653,GO:0009987,GO:0010008,GO:0012506,GO:0016020,GO:0016043,GO:0016192,GO:0019898,GO:0022607,GO:0030029,GO:0030030,GO:…
g26355.t1	6mA	GO:0001775,GO:0002252,GO:0002253,GO:0002376,GO:0002429,GO:0002431,GO:0002433,GO:0002577,GO:0002625,GO:0002682,GO:0002684,GO:0002697,GO:0002703,GO:0002706,GO:0002709,GO:0002757,GO:0002764,GO:0002768,GO:0002819,GO:0002822,GO:0003674,GO:0005488,GO:0005515,GO:0005575,GO:0005829,GO:0005856,GO:0005911,GO:0006461,GO:0006810,GO:0006928,GO:0006950,GO:0006952,GO:0006955,GO:0007015,GO:0007155,GO:0007159,GO:…
g39752.t1	6mA	GO:0001786,GO:0003674,GO:0005488,GO:0005509,GO:0005543,GO:0005544,GO:0005575,GO:0005615,GO:0005654,GO:0005886,GO:0008289,GO:0016020,GO:0031982,GO:0031988,GO:0043167,GO:0043168,GO:0043169,GO:0043226,GO:0043227,GO:0043230,GO:0044421,GO:0044422,GO:0044424,GO:0044428,GO:0044446,GO:0044464,GO:0046872,GO:0065010,GO:0070062,GO:0072341,GO:0097367,GO:1901611,GO:1903561
g41355.t1	6mA	GO:0001816,GO:0001817,GO:0001819,GO:0002831,GO:0003674,GO:0003676,GO:0003723,GO:0003824,GO:0005488,GO:0005575,GO:0005615,GO:0005634,GO:0005730,GO:0005737,GO:0006139,GO:0006355,GO:0006396,GO:0006401,GO:0006725,GO:0006807,GO:0007165,GO:0007166,GO:0008150,GO:0008152,GO:0008270,GO:0009056,GO:0009057,GO:0009889,GO:0009966,GO:0009987,GO:0010468,GO:0010556,GO:0010586,GO:0010587,GO:0010646,GO:0016070,GO:…
g65145.t1	6mA	GO:0001817,GO:0001819,GO:0003674,GO:0005488,GO:0005515,GO:0005575,GO:0005634,GO:0006355,GO:0008134,GO:0008150,GO:0009889,GO:0010468,GO:0010556,GO:0019219,GO:0019222,GO:0031323,GO:0031326,GO:0031347,GO:0031349,GO:0032101,GO:0032103,GO:0043226,GO:0043227,GO:0043229,GO:0043231,GO:0044093,GO:0044424,GO:0044464,GO:0048518,GO:0048583,GO:0048584,GO:0050727,GO:0050729,GO:0050789,GO:0050794,GO:0051059,GO:…
g20934.t1	6mA	GO:0001817,GO:0002682,GO:0002683,GO:0005575,GO:0005634,GO:0005829,GO:0008150,GO:0009966,GO:0009968,GO:0010646,GO:0010648,GO:0023051,GO:0023057,GO:0031982,GO:0031988,GO:0043226,GO:0043227,GO:0043229,GO:0043230,GO:0043231,GO:0044421,GO:0044424,GO:0044444,GO:0044464,GO:0048519,GO:0048523,GO:0048583,GO:0048585,GO:0050789,GO:0050794,GO:0050854,GO:0050856,GO:0050858,GO:0050860,GO:0051239,GO:0065007,GO:…
g32975.t1	6mA	GO:0001822,GO:0001947,GO:0002009,GO:0003143,GO:0003279,GO:0003283,GO:0003341,GO:0003351,GO:0003674,GO:0003824,GO:0003956,GO:0005488,GO:0005515,GO:0005575,GO:0005829,GO:0005929,GO:0005975,GO:0006464,GO:0006471,GO:0006486,GO:0006928,GO:0006996,GO:0007017,GO:0007018,GO:0007165,GO:0007166,GO:0007368,GO:0007389,GO:0008150,GO:0008152,GO:0009653,GO:0009799,GO:0009855,GO:0009887,GO:0009966,GO:0009968,GO:…
g39567.t1	6mA	GO:0001822,GO:0001947,GO:0002009,GO:0003143,GO:0003279,GO:0003283,GO:0003341,GO:0003351,GO:0003674,GO:0005488,GO:0005515,GO:0005575,GO:0005576,GO:0005829,GO:0005929,GO:0006928,GO:0006996,GO:0007017,GO:0007018,GO:0007165,GO:0007166,GO:0007368,GO:0007389,GO:0008150,GO:0009405,GO:0009653,GO:0009799,GO:0009855,GO:0009887,GO:0009966,GO:0009968,GO:0009987,GO:0010646,GO:0010648,GO:0016043,GO:0016055,GO:…
g45275.t1	6mA	GO:0001822,GO:0001947,GO:0002009,GO:0003143,GO:0003279,GO:0003283,GO:0003341,GO:0003351,GO:0003674,GO:0005488,GO:0005515,GO:0005575,GO:0005576,GO:0005829,GO:0005929,GO:0006928,GO:0006996,GO:0007017,GO:0007018,GO:0007165,GO:0007166,GO:0007368,GO:0007389,GO:0008150,GO:0009405,GO:0009653,GO:0009799,GO:0009855,GO:0009887,GO:0009966,GO:0009968,GO:0009987,GO:0010646,GO:0010648,GO:0016043,GO:0016055,GO:…
g319.t1	6mA	GO:0001822,GO:0001947,GO:0002009,GO:0003143,GO:0003279,GO:0003283,GO:0003341,GO:0003351,GO:0003674,GO:0005488,GO:0005515,GO:0005575,GO:0005829,GO:0005929,GO:0006928,GO:0006996,GO:0007017,GO:0007018,GO:0007165,GO:0007166,GO:0007368,GO:0007389,GO:0008150,GO:0009653,GO:0009799,GO:0009855,GO:0009887,GO:0009966,GO:0009968,GO:0009987,GO:0010646,GO:0010648,GO:0016043,GO:0016055,GO:0022603,GO:0023051,GO:…
g2487.t1	6mA	GO:0001822,GO:0001947,GO:0002009,GO:0003143,GO:0003279,GO:0003283,GO:0003674,GO:0005488,GO:0005515,GO:0005575,GO:0005576,GO:0005929,GO:0006140,GO:0006629,GO:0007163,GO:0007165,GO:0007166,GO:0007368,GO:0007389,GO:0008150,GO:0008152,GO:0009405,GO:0009653,GO:0009799,GO:0009855,GO:0009887,GO:0009966,GO:0009968,GO:0009987,GO:0010646,GO:0010648,GO:0016043,GO:0016055,GO:0019219,GO:0019220,GO:0019222,GO:…
g55714.t1	6mA	GO:0001822,GO:0001947,GO:0002009,GO:0003143,GO:0003279,GO:0003283,GO:0003674,GO:0005488,GO:0005515,GO:0005575,GO:0005576,GO:0005929,GO:0006140,GO:0006629,GO:0007163,GO:0007165,GO:0007166,GO:0007368,GO:0007389,GO:0008150,GO:0008152,GO:0009405,GO:0009653,GO:0009799,GO:0009855,GO:0009887,GO:0009966,GO:0009968,GO:0009987,GO:0010646,GO:0010648,GO:0016043,GO:0016055,GO:0019219,GO:0019220,GO:0019222,GO:…
g18154.t1	6mA	GO:0001822,GO:0001947,GO:0002009,GO:0003143,GO:0003279,GO:0003283,GO:0003674,GO:0005488,GO:0005515,GO:0005575,GO:0005929,GO:0006140,GO:0006629,GO:0007163,GO:0007165,GO:0007166,GO:0007368,GO:0007389,GO:0008150,GO:0008152,GO:0009653,GO:0009799,GO:0009855,GO:0009887,GO:0009966,GO:0009968,GO:0009987,GO:0010646,GO:0010648,GO:0016043,GO:0016055,GO:0019219,GO:0019220,GO:0019222,GO:0023051,GO:0023057,GO:…
g8205.t1	6mA	GO:0001822,GO:0001947,GO:0002009,GO:0003143,GO:0003279,GO:0003283,GO:0003674,GO:0005488,GO:0005515,GO:0005575,GO:0005929,GO:0006140,GO:0006629,GO:0007163,GO:0007165,GO:0007166,GO:0007368,GO:0007389,GO:0008150,GO:0008152,GO:0009653,GO:0009799,GO:0009855,GO:0009887,GO:0009966,GO:0009968,GO:0009987,GO:0010646,GO:0010648,GO:0016043,GO:0016055,GO:0019219,GO:0019220,GO:0019222,GO:0023051,GO:0023057,GO:…
g63656.t1	6mA	GO:0001846,GO:0001848,GO:0001849,GO:0001871,GO:0001872,GO:0001878,GO:0002252,GO:0002376,GO:0003674,GO:0005488,GO:0005515,GO:0005575,GO:0005615,GO:0006950,GO:0006952,GO:0006955,GO:0008150,GO:0008228,GO:0009605,GO:0009607,GO:0009620,GO:0009889,GO:0009891,GO:0009892,GO:0009893,GO:0010605,GO:0019222,GO:0030100,GO:0030246,GO:0030247,GO:0031323,GO:0031324,GO:0031325,GO:0031326,GO:0031328,GO:0032879,GO:…
g70752.t1	6mA	GO:0001871,GO:0002376,GO:0003674,GO:0003824,GO:0004872,GO:0005044,GO:0005488,GO:0005575,GO:0005615,GO:0006508,GO:0006955,GO:0007155,GO:0008150,GO:0008152,GO:0008233,GO:0008234,GO:0016787,GO:0019538,GO:0022610,GO:0030246,GO:0030247,GO:0038024,GO:0043170,GO:0044238,GO:0044421,GO:0050896,GO:0060089,GO:0070011,GO:0071704
[truncated: 826 more rows]

## Sheet: Av-GO_slim
GO_slim	Definitions	Counts-all	Fractions-all	Counts-6mA-TS	Fractions-6mA-TS	Fisher-test	p-val
[truncated: 111 more rows]

[truncated: 1 more sheets: AvL1-GO_slim]
